# Supplementary material for: Xkr regulates phosphatidylserine transport via enhanced ER-PM connectivity to promote apoptotic cell clearance
Source: Research Square preprint supplement (doi:10.21203/rs.3.rs-5680329/v1), 2025-01-31
Supplement: Supplementary file 1 [file 4b1186057cd8aaeee4a8dcb6.xlsx]

## Sheet: Sheet2
Gene	Forward	Reverse
xkr	CGCGTATGTGGCCAGTAT	TAAGTACGCACAGTATTTGGA
tm9sf4	GGAGAGACGCAGCTATATTT	TCGCGACCCTTCATTGTT
sac1	CGGGCACACGGCTCTT	CTGCGTGGACACCAATTTG
cg1513	GGGACAAGGAAAGCCTTTAG	CAGCATTCTCGTCCAGAAC
cg3860	CCGTATCAGCATTAGCCTC	GAAACTCGACGGTCACAG
cg9205	ATGGCAGTACCGTTGGTTT	TTGTTCCGTGAGAAACAGAG
cg42668	GCAGCAGCCCGCAAC	ACGCCCAGCGATTGGT
cg6708	GTAGTAGCGAGGACCAGG	CAGCAGCGGATTGAAGG
vap33	GACTAAACCGGGGACCGTAT	TGTGAGGGATTTCATAGGGC
dcp-1	GCGGTGGCCATACTCTC	GAACAGCTTCGGCTTGC
Add T7 promoter taatacgactcactatagggaga to each primer 5’end.
