# Supplementary material for: Xkr regulates phosphatidylserine transport via enhanced ER-PM connectivity to promote apoptotic cell clearance
Source: Research Square preprint supplement (doi:10.21203/rs.3.rs-5680329/v1), 2025-01-31
Supplement: Supplementary file 2 [file 6cae57a7c2cf974f00ef24bb.xlsx]

## Sheet: Sheet2
Gene	Forward	Reverse	Reference
Rpl32	CCTCTCAACGTATTGCAGAC	GTAAATGAACACTGCGAAGATTATG	This paper
xkr	GAATCAGCACCGCAGAAAATAC	AGGCGATTGGAGTGATTGTAC	This paper
cg1513	AAGGTCAAGTAATAGGCAAGGG	GTCGTAGGCATCGTAGAAGTC	This paper
tm9sf4	ACTTATTTCCAGCTCTGCGG	CGTCGGTATGAACTCTGTGATC	This paper
cg3860	GGTAACTTGGATGGTGCCTC	CTTTGTATGTGGGTTAGTTGCG	This paper
sac1	ATCCACAAGTGCGATACGAG	GATAGACACCGAACTGATCCTG	This paper
xkr8	GCAGCTGGGTTACCTGTAC	GTCTCGAAGAGCCGCAG	This paper
osbpl5	ACAGCCGCACATTCTACATAG	AGCGAGTTCCCATAAAACCTG	This paper
osbpl8	GAATCCAACACCTGACATTAAGC	TCTTGGGTAGCTTCAGTTTGG	This paper
sacm1l	GCGATGCTAAACCATGTCTTG	TCCATACAAACCGCTGATCTG	This paper
vapb	GATATGGAAGCAGTATGGAAGGAG	CTGTCTTTGATGCAGTTGTGG	This paper
htm9sf4	GGTGTTTGGCGGATTTTCTG	GAGTGCTTTCCCCAAATGAAG	This paper
xkr sgRNA1	ttcGCACATGTGCAATAAGGAGG	aacCCTCCTTATTGCACATGTGC	This paper
xkr sgRNA2	ttcGAAGTGGACGCCCTTATGAT	aacATCATAAGGGCGTCCACTTC	This paper
xkr sgRNA3	ttcGATTTGCATCAACTGGAGCC	aacGGCTCCAGTTGATGCAAATC	This paper
