# Supplementary material for: Xkr regulates phosphatidylserine transport via enhanced ER-PM connectivity to promote apoptotic cell clearance
Source: Research Square preprint supplement (doi:10.21203/rs.3.rs-5680329/v1), 2025-01-31
Supplement: Supplementary file 3 [file 936d8732be857b629508cb7f.xlsx]

## Sheet: Sheet1
Protein IDs	Protein names	Gene names	Fasta headers	Number of proteins	Peptides	Unique peptides	Mol. weight [kDa]	Sequence length	Sequence coverage R1202-S2 [%]	Sequence coverage R1202-SAC1 [%]	LFQ intensity R1202-S2	LFQ intensity R1202-SAC1
A0A1B2AJK8;B7FNL1;Q24154;Q8SXW1	60S ribosomal protein L29	RpL29-RB;RpL29	tr|A0A1B2AJK8|A0A1B2AJK8_DROME 60S ribosomal protein L29 (Fragment) OS=Drosophila melanogaster OX=7227 PE=2 SV=1;tr|B7FNL1|B7FNL1_DROME 60S ribosomal protein L29 (Fragment) OS=Drosophila melanogaster OX=7227 GN=RpL29-RB PE=2 SV=1;sp|Q24154|RL29_DROME 60S r	4	3	3	8.9202	76	0	25	0	4770200
M9PCI2;Q9V3U2	H/ACA ribonucleoprotein complex subunit 2-like protein	NHP2	tr|M9PCI2|M9PCI2_DROME GEO11453p1 OS=Drosophila melanogaster OX=7227 GN=NHP2 PE=2 SV=1;sp|Q9V3U2|NHP2_DROME H/ACA ribonucleoprotein complex subunit 2-like protein OS=Drosophila melanogaster OX=7227 GN=NHP2 PE=1 SV=1	2	2	2	17.723	160	0	24.4	0	1894400
Q8I7Q4		sORF	tr|Q8I7Q4|Q8I7Q4_DROME ORF1 OS=Drosophila melanogaster OX=7227 PE=4 SV=1	1	1	1	11.585	101	0	19.8	0	654640
A8E6J8;Q9VE50	Golgi SNAP receptor complex member 1	Gos28	tr|A8E6J8|A8E6J8_DROME Golgi SNAP receptor complex member 1 OS=Drosophila melanogaster OX=7227 GN=Gos28 PE=2 SV=1;sp|Q9VE50|GOSR1_DROME Golgi SNAP receptor complex member 1 OS=Drosophila melanogaster OX=7227 GN=Gos28 PE=2 SV=1	2	2	2	25.562	232	0	18.1	0	1430800
A0A1B2AJN1;Q8SZ16	Succinate dehydrogenase assembly factor 3, mitochondrial	Sdhaf3	tr|A0A1B2AJN1|A0A1B2AJN1_DROME GEO07535p1 (Fragment) OS=Drosophila melanogaster OX=7227 PE=2 SV=1;sp|Q8SZ16|SDHF3_DROME Succinate dehydrogenase assembly factor 3, mitochondrial OS=Drosophila melanogaster OX=7227 GN=Sdhaf3 PE=2 SV=1	2	1	1	13.894	120	0	17.5	0	225200
Q9VDL4			tr|Q9VDL4|Q9VDL4_DROME LP04613p OS=Drosophila melanogaster OX=7227 GN=Dmel\CG10877 PE=1 SV=1	1	3	3	48.495	441	0	16.6	0	857620
E1JGQ3;Q9W2J6;A0A0B4LG72;A0A0B4LG29;A0A0B4K7X5;A0A0B4LFW5;C0PUZ9		Glycogenin	tr|E1JGQ3|E1JGQ3_DROME Glycogenin, isoform I OS=Drosophila melanogaster OX=7227 GN=Gyg PE=1 SV=1;tr|Q9W2J6|Q9W2J6_DROME Glycogenin, isoform B OS=Drosophila melanogaster OX=7227 GN=Gyg PE=1 SV=3;tr|A0A0B4LG72|A0A0B4LG72_DROME Glycogenin, isoform H OS=Drosop	7	2	2	32.839	287	0	16	0	727590
Q8MRI6;Q9VMB3;Q8IGQ9		CG11050	tr|Q8MRI6|Q8MRI6_DROME LD22339p OS=Drosophila melanogaster OX=7227 GN=CG11050 PE=2 SV=1;tr|Q9VMB3|Q9VMB3_DROME Uncharacterized protein, isoform A OS=Drosophila melanogaster OX=7227 GN=Dmel\CG11050 PE=1 SV=1;tr|Q8IGQ9|Q8IGQ9_DROME RE44531p OS=Drosophila mel	3	2	2	20.159	176	0	15.9	0	639710
M9PJE8;Q24337	Protein enhancer of rudimentary	e(r)	tr|M9PJE8|M9PJE8_DROME Protein enhancer of rudimentary OS=Drosophila melanogaster OX=7227 GN=e(r) PE=2 SV=1;sp|Q24337|ER_DROME Protein enhancer of rudimentary OS=Drosophila melanogaster OX=7227 GN=e(r) PE=1 SV=1	2	1	1	12.188	104	0	15.4	0	450680
P43332;K7Z580	U1 small nuclear ribonucleoprotein A	snf	sp|P43332|SNRPA_DROME U1 small nuclear ribonucleoprotein A OS=Drosophila melanogaster OX=7227 GN=snf PE=1 SV=1;tr|K7Z580|K7Z580_DROME Sans fille (Fragment) OS=Drosophila melanogaster OX=7227 GN=snf PE=4 SV=1	2	2	2	24.546	216	0	15.3	0	1550000
C0PUW8;Q9V9S0;Q8SZP0		CG3305-RA;Lamp1	tr|C0PUW8|C0PUW8_DROME MIP02948p OS=Drosophila melanogaster OX=7227 GN=CG3305-RA PE=2 SV=1;tr|Q9V9S0|Q9V9S0_DROME FI04419p OS=Drosophila melanogaster OX=7227 GN=Lamp1 PE=1 SV=3;tr|Q8SZP0|Q8SZP0_DROME RE72002p OS=Drosophila melanogaster OX=7227 GN=Lamp1 PE=	3	2	2	22.573	202	0	13.9	0	1253700
Q9VBX2	Molybdopterin synthase catalytic subunit	Mocs2	sp|Q9VBX2|MOC2B_DROME Molybdopterin synthase catalytic subunit OS=Drosophila melanogaster OX=7227 GN=Mocs2 PE=2 SV=2	1	2	2	41.89	367	0	13.9	0	1775700
Q8SX73;Q9VJI6;X2JED0;A8DZ09;M9PG25;M9PBC6		CG17912	tr|Q8SX73|Q8SX73_DROME LD27810p OS=Drosophila melanogaster OX=7227 GN=BuGZ PE=2 SV=1;tr|Q9VJI6|Q9VJI6_DROME Bub3 interacting GLEBS and zinc finger domain protein, isoform A OS=Drosophila melanogaster OX=7227 GN=BuGZ PE=1 SV=2;tr|X2JED0|X2JED0_DROME Bub3 in	6	1	1	10.6	101	0	13.9	0	607410
Q9VVN2	Probable 28S ribosomal protein S26, mitochondrial	mRpS26	sp|Q9VVN2|RT26_DROME Probable 28S ribosomal protein S26, mitochondrial OS=Drosophila melanogaster OX=7227 GN=mRpS26 PE=2 SV=1	1	1	1	26.263	225	0	13.8	0	251380
Q9VPL3	39S ribosomal protein L10, mitochondrial	mRpL10	sp|Q9VPL3|RM10_DROME 39S ribosomal protein L10, mitochondrial OS=Drosophila melanogaster OX=7227 GN=mRpL10 PE=2 SV=1	1	2	2	28.336	248	0	13.3	0	499790
X2JGV8;Q9VW12	UPF0389 protein CG9231	CG9231	tr|X2JGV8|X2JGV8_DROME Uncharacterized protein, isoform B OS=Drosophila melanogaster OX=7227 GN=Dmel\CG9231 PE=4 SV=1;sp|Q9VW12|U389_DROME UPF0389 protein CG9231 OS=Drosophila melanogaster OX=7227 GN=CG9231 PE=1 SV=1	2	1	1	14.104	125	0	12.8	0	687470
Q9VUL8		Pex3	tr|Q9VUL8|Q9VUL8_DROME LD41491p OS=Drosophila melanogaster OX=7227 GN=Pex3 PE=1 SV=1	1	2	2	43.693	385	0	12.5	0	1894600
Q5BIK3;Q9VDE5	Protein Peter pan	ppan	tr|Q5BIK3|Q5BIK3_DROME RH53050p OS=Drosophila melanogaster OX=7227 GN=ppan PE=2 SV=1;sp|Q9VDE5|PPAN_DROME Protein Peter pan OS=Drosophila melanogaster OX=7227 GN=ppan PE=1 SV=1	2	2	2	30.542	267	0	12.4	0	897160
Q9VHK6		IscU	tr|Q9VHK6|Q9VHK6_DROME GEO04668p1 OS=Drosophila melanogaster OX=7227 GN=IscU PE=1 SV=1	1	1	1	16.717	154	0	12.3	0	378200
Q9VMY1	Probable 39S ribosomal protein L24, mitochondrial	mRpL24	sp|Q9VMY1|RM24_DROME Probable 39S ribosomal protein L24, mitochondrial OS=Drosophila melanogaster OX=7227 GN=mRpL24 PE=2 SV=1	1	2	2	29.216	247	0	12.1	0	727670
Q7K4C7		Cct1	tr|Q7K4C7|Q7K4C7_DROME LD46058p OS=Drosophila melanogaster OX=7227 GN=Pcyt1 PE=1 SV=1	1	2	2	58.201	526	0	12	0	1603100
Q9VMH8			tr|Q9VMH8|Q9VMH8_DROME GEO07746p1 OS=Drosophila melanogaster OX=7227 GN=Pfdn1 PE=1 SV=2	1	1	1	14.749	126	0	11.9	0	1030600
A4UZ58;A1Z6Q0;Q8MS42;A1Z6Q1;A0A0B4KEE4		koi	tr|A4UZ58|A4UZ58_DROME Klaroid, isoform E OS=Drosophila melanogaster OX=7227 GN=koi PE=1 SV=1;tr|A1Z6Q0|A1Z6Q0_DROME Klaroid, isoform D OS=Drosophila melanogaster OX=7227 GN=koi PE=1 SV=1;tr|Q8MS42|Q8MS42_DROME RE12054p OS=Drosophila melanogaster OX=7227 G	5	3	3	42.173	365	0	11.5	0	692870
Q9VMQ9		cl	tr|Q9VMQ9|Q9VMQ9_DROME Clot protein OS=Drosophila melanogaster OX=7227 GN=cl PE=1 SV=1	1	1	1	14.66	126	0	11.1	0	0
Q9VZY9;Q86P96;M9PBJ9;Q6NQW5		Aats-pro	tr|Q9VZY9|Q9VZY9_DROME FI22774p1 OS=Drosophila melanogaster OX=7227 GN=ProRS-m PE=1 SV=1;tr|Q86P96|Q86P96_DROME GM03563p OS=Drosophila melanogaster OX=7227 GN=ProRS-m PE=2 SV=1;tr|M9PBJ9|M9PBJ9_DROME Prolyl-tRNA synthetase, mitochondrial, isoform B OS=Dros	4	4	4	50.66	458	0	10.9	0	1213000
Q9VU36		mRpL20	tr|Q9VU36|Q9VU36_DROME LP04985p OS=Drosophila melanogaster OX=7227 GN=mRpL20 PE=1 SV=1	1	1	1	17.372	150	0	10.7	0	369600
Q9VA97			tr|Q9VA97|Q9VA97_DROME Pyridoxal phosphate homeostasis protein OS=Drosophila melanogaster OX=7227 GN=Dmel\CG1983 PE=1 SV=2	1	2	2	28.272	254	0	10.6	0	175640
P48611	6-pyruvoyl tetrahydrobiopterin synthase	pr	sp|P48611|PTPS_DROME 6-pyruvoyl tetrahydrobiopterin synthase OS=Drosophila melanogaster OX=7227 GN=pr PE=1 SV=1	1	1	1	19.337	168	0	10.1	0	627120
Q9VG96	Glutathione S-transferase D4	GstD4	sp|Q9VG96|GSTD4_DROME Glutathione S-transferase D4 OS=Drosophila melanogaster OX=7227 GN=GstD4 PE=1 SV=1	1	1	1	24.736	215	0	9.8	0	350470
Q9W3C8			tr|Q9W3C8|Q9W3C8_DROME LD36568p OS=Drosophila melanogaster OX=7227 GN=CAH3 PE=1 SV=1	1	1	1	28.803	250	0	9.6	0	954990
Q8IGA0;Q9VIT3;Q9U6R8		msb1l	tr|Q8IGA0|Q8IGA0_DROME SD14117p OS=Drosophila melanogaster OX=7227 GN=msb1l PE=2 SV=1;tr|Q9VIT3|Q9VIT3_DROME LD32040p OS=Drosophila melanogaster OX=7227 GN=msb1l PE=1 SV=2;tr|Q9U6R8|Q9U6R8_DROME MSB1L OS=Drosophila melanogaster OX=7227 GN=msb1l PE=2 SV=1	3	2	2	33.043	298	0	9.4	0	914570
Q9W4I3;Q8SYI9		mRpL30	tr|Q9W4I3|Q9W4I3_DROME FI01736p OS=Drosophila melanogaster OX=7227 GN=mRpL30 PE=1 SV=1;tr|Q8SYI9|Q8SYI9_DROME RE56957p OS=Drosophila melanogaster OX=7227 GN=mRpL30 PE=2 SV=1	2	1	1	20.989	180	0	9.4	0	894260
Q9VZZ6			tr|Q9VZZ6|Q9VZZ6_DROME CG16985 protein OS=Drosophila melanogaster OX=7227 GN=BcDNA:RE30174 PE=1 SV=1	1	1	1	16.077	149	0	9.4	0	762270
A0A0B4KF31;Q9W1X9	OCIA domain-containing protein 1	asrij	tr|A0A0B4KF31|A0A0B4KF31_DROME Asrij, isoform B OS=Drosophila melanogaster OX=7227 GN=asrij PE=4 SV=1;sp|Q9W1X9|OCAD1_DROME OCIA domain-containing protein 1 OS=Drosophila melanogaster OX=7227 GN=asrij PE=1 SV=1	2	1	1	28.692	258	0	9.3	0	0
C0PV05;M9NCX9;E1JHQ0;E1JHP9;C0PV96;Q9VPI6	Galectin	galectin-RA;galectin	tr|C0PV05|C0PV05_DROME Galectin OS=Drosophila melanogaster OX=7227 GN=galectin-RA PE=2 SV=1;tr|M9NCX9|M9NCX9_DROME Galectin OS=Drosophila melanogaster OX=7227 GN=galectin PE=1 SV=1;tr|E1JHQ0|E1JHQ0_DROME Galectin OS=Drosophila melanogaster OX=7227 GN=galec	6	1	1	24.69	214	0	9.3	0	170870
Q95T90;E1JHY0;Q9I7R1;Q0E8F4;Q4LDP7;Q0E8F5;X2JGK6	NADH-cytochrome b5 reductase	CG5946;zetaCOP;CG5946-RB	tr|Q95T90|Q95T90_DROME NADH-cytochrome b5 reductase OS=Drosophila melanogaster OX=7227 GN=CG5946 PE=2 SV=1;tr|E1JHY0|E1JHY0_DROME NADH-cytochrome b5 reductase OS=Drosophila melanogaster OX=7227 GN=Dmel\CG5946 PE=1 SV=1;tr|Q9I7R1|Q9I7R1_DROME NADH-cytochrom	7	2	2	29.654	263	0	9.1	0	1052200
Q8IH72;Q9I7W2		CG12106	tr|Q8IH72|Q8IH72_DROME GH03263p (Fragment) OS=Drosophila melanogaster OX=7227 GN=CG12106 PE=2 SV=1;tr|Q9I7W2|Q9I7W2_DROME RE09151p OS=Drosophila melanogaster OX=7227 GN=Dmel\CG12106 PE=2 SV=1	2	1	1	22.836	209	0	9.1	0	68529
Q9VXK7;Q9VAK5;Q4V6N9		ND-20;ND-20L;CG2014	tr|Q9VXK7|Q9VXK7_DROME LD31474p OS=Drosophila melanogaster OX=7227 GN=ND-20 PE=2 SV=1;tr|Q9VAK5|Q9VAK5_DROME NADH dehydrogenase (Ubiquinone) 20 kDa subunit-like, isoform A OS=Drosophila melanogaster OX=7227 GN=ND-20L PE=3 SV=1;tr|Q4V6N9|Q4V6N9_DROME IP0816	3	2	2	24.594	221	0	9	0	714420
Q86DT8;Q86DT7;Q86DT6;Q86DT5;Q9XYW6		CHIP	tr|Q86DT8|Q86DT8_DROME Hsp70-interacting protein (Fragment) OS=Drosophila melanogaster OX=7227 GN=STUB1 PE=4 SV=1;tr|Q86DT7|Q86DT7_DROME Hsp70-interacting protein (Fragment) OS=Drosophila melanogaster OX=7227 GN=STUB1 PE=4 SV=1;tr|Q86DT6|Q86DT6_DROME Hsp70	5	1	1	26.01	221	0	9	0	317310
Q9VET3			tr|Q9VET3|Q9VET3_DROME Uncharacterized protein OS=Drosophila melanogaster OX=7227 GN=Dmel\CG14903 PE=4 SV=1	1	1	1	13.47	119	0	8.4	0	199170
Q9VQ84;E4NKL4;Q9VQ83;M9PB06		CG10874-RB	tr|Q9VQ84|Q9VQ84_DROME Uncharacterized protein, isoform B OS=Drosophila melanogaster OX=7227 GN=FBgn 31395 PE=1 SV=3;tr|E4NKL4|E4NKL4_DROME LP11854p OS=Drosophila melanogaster OX=7227 GN=CG10874-RB PE=1 SV=1;tr|Q9VQ83|Q9VQ83_DROME RE23541p OS=Drosophila me	4	1	1	24.129	218	0	8.3	0	130350
Q9VLW8;Q2Q0L4;Q2Q0L3;Q2Q0L0;Q2Q0K9;Q2Q0K8;Q2Q0K7		r2d2	tr|Q9VLW8|Q9VLW8_DROME LD06392p OS=Drosophila melanogaster OX=7227 GN=r2d2 PE=1 SV=1;tr|Q2Q0L4|Q2Q0L4_DROME R2D2 OS=Drosophila melanogaster OX=7227 GN=r2d2 PE=4 SV=1;tr|Q2Q0L3|Q2Q0L3_DROME R2D2 OS=Drosophila melanogaster OX=7227 GN=r2d2 PE=4 SV=1;tr|Q2Q0L0	7	2	2	35.069	311	0	8	0	1180200
Q8IA62;Q9VJ11		anon-37B-2	tr|Q8IA62|Q8IA62_DROME Calcium load-activated calcium channel OS=Drosophila melanogaster OX=7227 GN=anon-37B-2 PE=3 SV=1;tr|Q9VJ11|Q9VJ11_DROME Calcium load-activated calcium channel OS=Drosophila melanogaster OX=7227 GN=anon-37B-2 PE=1 SV=1	2	1	1	20.369	177	0	7.9	0	627990
Q9W107	Tyrosine--tRNA ligase, mitochondrial	Aats-tyr-m	sp|Q9W107|SYYM_DROME Tyrosine--tRNA ligase, mitochondrial OS=Drosophila melanogaster OX=7227 GN=TyrRS-m PE=2 SV=1	1	2	2	52.574	464	0	7.8	0	839900
Q9VND4;Q4QPV1			tr|Q9VND4|Q9VND4_DROME GEO12035p1 OS=Drosophila melanogaster OX=7227 GN=Dmel\CG14671 PE=2 SV=1;tr|Q4QPV1|Q4QPV1_DROME IP04606p (Fragment) OS=Drosophila melanogaster OX=7227 PE=2 SV=1	2	1	1	17.293	155	0	7.7	0	514440
Q9V439	Mediator of RNA polymerase II transcription subunit 22	MED22	sp|Q9V439|MED22_DROME Mediator of RNA polymerase II transcription subunit 22 OS=Drosophila melanogaster OX=7227 GN=MED22 PE=1 SV=1	1	1	1	16.594	143	0	7.7	0	206110
Q9VG76	C-Myc-binding protein homolog	CG17202	sp|Q9VG76|MYCBP_DROME c-Myc-binding protein homolog OS=Drosophila melanogaster OX=7227 GN=CG17202 PE=2 SV=2	1	1	1	20.153	181	0	7.7	0	975560
M9PBM3;Q9VPW2		Atg4a	tr|M9PBM3|M9PBM3_DROME Cysteine protease OS=Drosophila melanogaster OX=7227 GN=Atg4a PE=1 SV=1;tr|Q9VPW2|Q9VPW2_DROME Cysteine protease OS=Drosophila melanogaster OX=7227 GN=Atg4a PE=1 SV=1	2	2	2	45.516	410	0	7.6	0	946400
A0A0B4LGC6;Q8MLS7;A0A0B4LG95;Q7K274		l(2)k09913	tr|A0A0B4LGC6|A0A0B4LGC6_DROME Lethal (2) k09913, isoform G OS=Drosophila melanogaster OX=7227 GN=l(2)k09913 PE=1 SV=1;tr|Q8MLS7|Q8MLS7_DROME Lethal (2) k09913, isoform D OS=Drosophila melanogaster OX=7227 GN=l(2)k09913 PE=1 SV=1;tr|A0A0B4LG95|A0A0B4LG95_D	4	1	1	33.302	288	0	7.3	0	751550
Q95SC3;Q9VZ62		feo	tr|Q95SC3|Q95SC3_DROME GM03548p OS=Drosophila melanogaster OX=7227 GN=feo PE=2 SV=1;tr|Q9VZ62|Q9VZ62_DROME Fascetto OS=Drosophila melanogaster OX=7227 GN=feo PE=1 SV=1	2	1	1	47.89	413	0	7.3	0	456770
Q9W1I0;O97469;Q8SXP8;O97468		TBPH	tr|Q9W1I0|Q9W1I0_DROME TAR DNA-binding protein-43 homolog, isoform A OS=Drosophila melanogaster OX=7227 GN=TBPH PE=1 SV=2;tr|O97469|O97469_DROME TAR-binding protein OS=Drosophila melanogaster OX=7227 GN=TBPH PE=2 SV=1;tr|Q8SXP8|Q8SXP8_DROME GH09868p OS=Dro	4	1	1	37.67	332	0	7.2	0	311640
A0A0B4KGQ0;Q9VCI7		RanBP3	tr|A0A0B4KGQ0|A0A0B4KGQ0_DROME Ran binding protein 3, isoform B OS=Drosophila melanogaster OX=7227 GN=RanBP3 PE=1 SV=1;tr|Q9VCI7|Q9VCI7_DROME LD02979p OS=Drosophila melanogaster OX=7227 GN=RanBP3 PE=1 SV=1	2	2	2	47.373	448	0	7.1	0	1868300
A9UNF7;Q8SZ03;Q7PLE6;H0RNB9		CG17691-RA;CG17691;CG17691-RE	tr|A9UNF7|A9UNF7_DROME LD02908p (Fragment) OS=Drosophila melanogaster OX=7227 GN=CG17691-RA PE=2 SV=2;tr|Q8SZ03|Q8SZ03_DROME RE25729p OS=Drosophila melanogaster OX=7227 GN=CG17691 PE=2 SV=1;tr|Q7PLE6|Q7PLE6_DROME Uncharacterized protein, isoform C OS=Droso	4	1	1	37.128	337	0	7.1	0	579940
Q9VHQ0;Q8IGA1		mRpS18A	tr|Q9VHQ0|Q9VHQ0_DROME FI06460p OS=Drosophila melanogaster OX=7227 GN=mRpS18A PE=1 SV=3;tr|Q8IGA1|Q8IGA1_DROME SD13983p OS=Drosophila melanogaster OX=7227 GN=mRpS18A PE=2 SV=1	2	1	1	17.828	155	0	7.1	0	548420
Q9VNC0;Q8IPQ6			tr|Q9VNC0|Q9VNC0_DROME GH11824p OS=Drosophila melanogaster OX=7227 GN=POLDIP2 PE=1 SV=1;tr|Q8IPQ6|Q8IPQ6_DROME Polymerase (DNA-directed), delta interacting protein 2, isoform B OS=Drosophila melanogaster OX=7227 GN=POLDIP2 PE=1 SV=1	2	2	2	46.283	410	0	6.8	0	586780
E8NH56;O96607;Q9VM94;M9PB54;M9PEX1;C9QPJ7;Q0E8S7		homer-RB;homer	tr|E8NH56|E8NH56_DROME AT09976p OS=Drosophila melanogaster OX=7227 GN=homer-RB PE=2 SV=1;tr|O96607|O96607_DROME Homer OS=Drosophila melanogaster OX=7227 GN=homer PE=1 SV=1;tr|Q9VM94|Q9VM94_DROME Homer, isoform B OS=Drosophila melanogaster OX=7227 GN=homer	7	1	1	27.198	250	0	6.8	0	740080
F6J6F8;F6J6F6;F6J6F4;Q8MRM0		CG1681;GstT4	tr|F6J6F8|F6J6F8_DROME CG1681 (Fragment) OS=Drosophila melanogaster OX=7227 GN=CG1681 PE=4 SV=1;tr|F6J6F6|F6J6F6_DROME CG1681 (Fragment) OS=Drosophila melanogaster OX=7227 GN=CG1681 PE=4 SV=1;tr|F6J6F4|F6J6F4_DROME CG1681 (Fragment) OS=Drosophila melanogas	4	1	1	22.478	192	0	6.8	0	784010
Q7K1Z5	Ubiquitin-fold modifier-conjugating enzyme 1	CG8386	sp|Q7K1Z5|UFC1_DROME Ubiquitin-fold modifier-conjugating enzyme 1 OS=Drosophila melanogaster OX=7227 GN=Ufc1 PE=2 SV=1	1	1	1	19.004	164	0	6.7	0	497840
Q960M5;Q9VDS7;A0A0B4LID7		CG4538;CG4538-RA	tr|Q960M5|Q960M5_DROME LD45279p OS=Drosophila melanogaster OX=7227 GN=CG4538 PE=2 SV=1;tr|Q9VDS7|Q9VDS7_DROME LD11650p OS=Drosophila melanogaster OX=7227 GN=Dmel\CG4538 PE=1 SV=2;tr|A0A0B4LID7|A0A0B4LID7_DROME Uncharacterized protein, isoform C OS=Drosophi	3	2	2	51.081	478	0	6.5	0	648750
Q5U119;Q9U1H6;O76521	Importin subunit alpha	Kap-alpha1	tr|Q5U119|Q5U119_DROME LP05312p OS=Drosophila melanogaster OX=7227 GN=Kap-alpha1 PE=2 SV=1;tr|Q9U1H6|Q9U1H6_DROME Importin subunit alpha OS=Drosophila melanogaster OX=7227 GN=Kap-alpha1 PE=3 SV=1;tr|O76521|O76521_DROME Importin subunit alpha OS=Drosophila	3	1	1	36.674	331	0	6.3	0	100260
E1JHX5;Q7K0L4	WD repeat-containing protein 26 homolog	CG7611	tr|E1JHX5|E1JHX5_DROME Uncharacterized protein, isoform B OS=Drosophila melanogaster OX=7227 GN=Dmel\CG7611 PE=1 SV=1;sp|Q7K0L4|WDR26_DROME WD repeat-containing protein 26 homolog OS=Drosophila melanogaster OX=7227 GN=CG7611 PE=1 SV=1	2	2	2	69.616	630	0	6.2	0	1717000
Q9Y124		BcDNA.GH08385	tr|Q9Y124|Q9Y124_DROME BcDNA.GH08385 OS=Drosophila melanogaster OX=7227 GN=BcDNA.GH08385 PE=1 SV=1	1	1	1	51.046	448	0	6.2	0	440540
A0A0B4K7R1;Q9VCA9	Signal peptidase complex subunit 3	Spase22-23	tr|A0A0B4K7R1|A0A0B4K7R1_DROME Signal peptidase complex subunit 3 OS=Drosophila melanogaster OX=7227 GN=Spase22-23 PE=3 SV=1;sp|Q9VCA9|SPCS3_DROME Signal peptidase complex subunit 3 OS=Drosophila melanogaster OX=7227 GN=Spase22-23 PE=2 SV=1	2	1	1	20.304	179	0	6.1	0	418680
Q7KN99;E2QD26		Ppcs	tr|Q7KN99|Q7KN99_DROME Phosphopantothenoylcysteine synthetase, isoform A OS=Drosophila melanogaster OX=7227 GN=Ppcs PE=1 SV=1;tr|E2QD26|E2QD26_DROME Phosphopantothenoylcysteine synthetase, isoform C OS=Drosophila melanogaster OX=7227 GN=Ppcs PE=1 SV=1	2	1	1	35.751	313	0	6.1	0	1211600
Q9VAM9	Guanosine-3,5-bis(diphosphate) 3-pyrophosphohydrolase MESH1	Mesh1	sp|Q9VAM9|MESH1_DROME Guanosine-3,5-bis(diphosphate) 3-pyrophosphohydrolase MESH1 OS=Drosophila melanogaster OX=7227 GN=Mesh1 PE=1 SV=1	1	1	1	20.569	179	0	6.1	0	0
Q9VN77			tr|Q9VN77|Q9VN77_DROME LD31216p OS=Drosophila melanogaster OX=7227 GN=Dmel\CG12007 PE=1 SV=1	1	2	2	59.793	515	0	6	0	614440
Q8INS9;Q6NP69		gfzf	tr|Q8INS9|Q8INS9_DROME GST-containing FLYWCH zinc-finger protein, isoform D OS=Drosophila melanogaster OX=7227 GN=gfzf PE=1 SV=2;tr|Q6NP69|Q6NP69_DROME GST-containing FLYWCH zinc-finger protein OS=Drosophila melanogaster OX=7227 GN=gfzf PE=1 SV=1	2	1	1	26.96	234	0	6	0	647140
Q9VMU6		CG18592	tr|Q9VMU6|Q9VMU6_DROME LD31822p OS=Drosophila melanogaster OX=7227 GN=Nepl3 PE=1 SV=2	1	3	3	73.136	629	0	5.9	0	1300900
A0A0B4KEK7;Q9V637	Proteasome inhibitor PI31 subunit	PI31	tr|A0A0B4KEK7|A0A0B4KEK7_DROME Proteasome inhibitor 31 kDa, isoform D OS=Drosophila melanogaster OX=7227 GN=PI31 PE=4 SV=1;sp|Q9V637|PSMF1_DROME Proteasome inhibitor PI31 subunit OS=Drosophila melanogaster OX=7227 GN=PI31 PE=1 SV=1	2	1	1	30.088	270	0	5.9	0	1435800
Q4V5T6;Q9VP84		CG10581	tr|Q4V5T6|Q4V5T6_DROME IP06602p OS=Drosophila melanogaster OX=7227 GN=CG10581 PE=2 SV=1;tr|Q9VP84|Q9VP84_DROME IP06402p OS=Drosophila melanogaster OX=7227 GN=Dmel\CG10581 PE=2 SV=2	2	1	1	20.665	187	0	5.9	0	346690
Q9VX56		CG5445-RD	tr|Q9VX56|Q9VX56_DROME LD03052p OS=Drosophila melanogaster OX=7227 GN=Dmel\CG5445 PE=2 SV=1	1	1	1	33.842	303	0	5.9	0	488150
M9PEN1;Q9VSY4	Alpha-tubulin N-acetyltransferase;Alpha-tubulin N-acetyltransferase 1	CG3967	tr|M9PEN1|M9PEN1_DROME Alpha-tubulin N-acetyltransferase OS=Drosophila melanogaster OX=7227 GN=Dmel\CG3967 PE=3 SV=1;sp|Q9VSY4|ATAT1_DROME Alpha-tubulin N-acetyltransferase 1 OS=Drosophila melanogaster OX=7227 GN=CG3967 PE=2 SV=2	2	1	1	32.015	291	0	5.8	0	565020
Q9VPX8		Tango14	tr|Q9VPX8|Q9VPX8_DROME RH48586p OS=Drosophila melanogaster OX=7227 GN=Tango14 PE=2 SV=1	1	1	1	31.475	278	0	5.8	0	529420
Q9VAJ9			tr|Q9VAJ9|Q9VAJ9_DROME SD09259p OS=Drosophila melanogaster OX=7227 GN=Dmel\CG1907 PE=1 SV=1	1	2	2	34.619	317	0	5.7	0	669530
Q5IF77;Q9VXW3;C5I7R2;C5I7Q4;C5I7K6;C5I7J0;C5I7I2;C5I7F8;C5I7E2;C5I7B8;C5I7A2		CG12608	tr|Q5IF77|Q5IF77_DROME CG12608 (Fragment) OS=Drosophila melanogaster OX=7227 GN=CG12608 PE=4 SV=1;tr|Q9VXW3|Q9VXW3_DROME LD30439p OS=Drosophila melanogaster OX=7227 GN=Dmel\CG12608 PE=1 SV=2;tr|C5I7R2|C5I7R2_DROME Uncharacterized protein OS=Drosophila mela	11	1	1	36.959	334	0	5.7	0	73069
Q7KS11;Q961C4		Ude	tr|Q7KS11|Q7KS11_DROME Uracil-DNA degrading factor, isoform B OS=Drosophila melanogaster OX=7227 GN=Ude PE=1 SV=1;tr|Q961C4|Q961C4_DROME LD23619p OS=Drosophila melanogaster OX=7227 GN=Ude PE=2 SV=1	2	1	1	35.52	316	0	5.7	0	149600
Q9VWS2	Nucleoporin NUP53		sp|Q9VWS2|NUP35_DROME Nucleoporin Nup35 OS=Drosophila melanogaster OX=7227 GN=Nup35 PE=1 SV=1	1	1	1	35.099	331	0	5.7	0	0
D3DMW7;Q24192	Ras-like GTP-binding protein RhoL	RhoL-RA;RhoL	tr|D3DMW7|D3DMW7_DROME MIP16962p OS=Drosophila melanogaster OX=7227 GN=RhoL PE=1 SV=1;sp|Q24192|RHOL_DROME Ras-like GTP-binding protein RhoL OS=Drosophila melanogaster OX=7227 GN=RhoL PE=2 SV=1	2	1	1	24.773	214	0	5.6	0	939890
Q9W0F9;Q9U3Y9		312	tr|Q9W0F9|Q9W0F9_DROME 312, isoform A OS=Drosophila melanogaster OX=7227 GN=312 PE=1 SV=1;tr|Q9U3Y9|Q9U3Y9_DROME 312 protein OS=Drosophila melanogaster OX=7227 GN=312 PE=2 SV=1	2	1	1	28.075	241	0	5.4	0	104900
Q9VUY9	Phosphoglucomutase	Pgm	sp|Q9VUY9|PGM_DROME Phosphoglucomutase OS=Drosophila melanogaster OX=7227 GN=Pgm PE=1 SV=1	1	1	1	60.765	560	0	5.4	0	717570
Q9VXB5	39S ribosomal protein L22, mitochondrial	mRpL22	sp|Q9VXB5|RM22_DROME 39S ribosomal protein L22, mitochondrial OS=Drosophila melanogaster OX=7227 GN=mRpL22 PE=2 SV=2	1	1	1	26.953	233	0	5.2	0	475040
Q8MRS6;Q9VPW9		CG4552	tr|Q8MRS6|Q8MRS6_DROME AT03044p OS=Drosophila melanogaster OX=7227 GN=CG4552 PE=2 SV=1;tr|Q9VPW9|Q9VPW9_DROME Uncharacterized protein OS=Drosophila melanogaster OX=7227 GN=Dmel\CG4552 PE=1 SV=2	2	3	3	77.462	689	0	5.1	0	307550
Q9VQ93	Golgi phosphoprotein 3 homolog rotini	rti	sp|Q9VQ93|GOLP3_DROME Golgi phosphoprotein 3 homolog sauron OS=Drosophila melanogaster OX=7227 GN=sau PE=1 SV=1	1	2	2	33.511	294	0	5.1	0	303100
Q95SB2;O16050;Q9VES8		CG10340;anon2A5	tr|Q95SB2|Q95SB2_DROME GM04207p OS=Drosophila melanogaster OX=7227 GN=CG10340 PE=2 SV=1;tr|O16050|O16050_DROME Anon2A5 (Fragment) OS=Drosophila melanogaster OX=7227 GN=anon2A5 PE=2 SV=1;tr|Q9VES8|Q9VES8_DROME RE28913p OS=Drosophila melanogaster OX=7227 GN=	3	1	1	29.339	254	0	5.1	0	413470
Q9VT75		vnc	tr|Q9VT75|Q9VT75_DROME LD19812p OS=Drosophila melanogaster OX=7227 GN=vnc PE=1 SV=1	1	1	1	22.324	196	0	5.1	0	1040900
A4V383;P91929	NADH dehydrogenase [ubiquinone] 1 alpha subcomplex subunit 10, mitochondrial	ND-42;ND42	tr|A4V383|A4V383_DROME NADH dehydrogenase [ubiquinone] 1 alpha subcomplex subunit 10, mitochondrial OS=Drosophila melanogaster OX=7227 GN=ND-42 PE=1 SV=1;sp|P91929|NDUAA_DROME NADH dehydrogenase [ubiquinone] 1 alpha subcomplex subunit 10, mitochondrial OS=	2	2	2	46.897	407	0	4.9	0	234140
A0A0B4KEH8;A0A0B4KEC2;Q9W5H8			tr|A0A0B4KEH8|A0A0B4KEH8_DROME Uncharacterized protein, isoform D OS=Drosophila melanogaster OX=7227 GN=Dmel\CG17883 PE=4 SV=1;tr|A0A0B4KEC2|A0A0B4KEC2_DROME Uncharacterized protein, isoform C OS=Drosophila melanogaster OX=7227 GN=CG40289 PE=4 SV=1;tr|Q9W5	3	1	1	43.107	371	0	4.9	0	57281
Q95SN1;Q5BIA9		CG8613	tr|Q95SN1|Q95SN1_DROME GH13403p OS=Drosophila melanogaster OX=7227 GN=CG8613 PE=2 SV=1;tr|Q5BIA9|Q5BIA9_DROME RE10908p OS=Drosophila melanogaster OX=7227 GN=Dmel\CG8613 PE=1 SV=1	2	2	2	71.328	629	0	4.8	0	253230
M9PBM0;O18391	Probable serine hydrolase	kraken	tr|M9PBM0|M9PBM0_DROME Kraken, isoform B OS=Drosophila melanogaster OX=7227 GN=kraken PE=4 SV=1;sp|O18391|KRAK_DROME Probable serine hydrolase OS=Drosophila melanogaster OX=7227 GN=kraken PE=2 SV=1	2	1	1	37.093	331	0	4.8	0	417630
Q1RL11;X2JJ32;B7Z134;D0IQI4;Q6IDE0;M9NGW5;M9NDS5;Q9W391	Probable phosphorylase b kinase regulatory subunit alpha	CG7766;CG7766-RB	tr|Q1RL11|Q1RL11_DROME Phosphorylase b kinase regulatory subunit OS=Drosophila melanogaster OX=7227 GN=CG7766 PE=2 SV=1;tr|X2JJ32|X2JJ32_DROME Phosphorylase b kinase regulatory subunit OS=Drosophila melanogaster OX=7227 GN=Dmel\CG7766 PE=1 SV=1;tr|B7Z134|B	8	1	1	65.816	577	0	4.7	0	206300
A0A0B4KHW3;A0A0B4K6V1;D0IQH2;Q9VA73;Q8SY57	Calcium-binding mitochondrial carrier protein Aralar1	aralar1;aralar1-RB	tr|A0A0B4KHW3|A0A0B4KHW3_DROME Aralar1, isoform F OS=Drosophila melanogaster OX=7227 GN=aralar1 PE=1 SV=1;tr|A0A0B4K6V1|A0A0B4K6V1_DROME Aralar1, isoform E OS=Drosophila melanogaster OX=7227 GN=aralar1 PE=1 SV=1;tr|D0IQH2|D0IQH2_DROME GH21613p (Fragment) O	5	2	2	76.51	694	0	4.5	0	545920
A0A0B4LHI3;Q9XZL8	Protein sarah	sra	tr|A0A0B4LHI3|A0A0B4LHI3_DROME Sarah, isoform B OS=Drosophila melanogaster OX=7227 GN=sra PE=4 SV=1;sp|Q9XZL8|SRA_DROME Protein sarah OS=Drosophila melanogaster OX=7227 GN=sra PE=1 SV=1	2	1	1	31.423	292	0	4.5	0	376840
Q9VX36;Q7JYN2		ND-24	tr|Q9VX36|Q9VX36_DROME NADH dehydrogenase (Ubiquinone) 24 kDa subunit, isoform A OS=Drosophila melanogaster OX=7227 GN=ND-24 PE=1 SV=1;tr|Q7JYN2|Q7JYN2_DROME GH08937p (Fragment) OS=Drosophila melanogaster OX=7227 GN=ND-24 PE=2 SV=1	2	1	1	26.781	242	0	4.5	0	382530
Q7KMK8;Q9VT61		BcDNA.GH07921	tr|Q7KMK8|Q7KMK8_DROME BcDNA.GH07921 OS=Drosophila melanogaster OX=7227 GN=BcDNA.GH07921 PE=2 SV=1;tr|Q9VT61|Q9VT61_DROME LD27033p OS=Drosophila melanogaster OX=7227 GN=Dmel\CG8108 PE=1 SV=1	2	1	1	46.658	418	0	4.5	0	147010
Q9W1F4	THO complex subunit 5	thoc5	sp|Q9W1F4|THOC5_DROME THO complex subunit 5 OS=Drosophila melanogaster OX=7227 GN=thoc5 PE=1 SV=2	1	2	2	70.888	616	0	4.4	0	512050
Q95S79;Q7JWQ7		Swim	tr|Q95S79|Q95S79_DROME GM06507p OS=Drosophila melanogaster OX=7227 GN=Swim PE=2 SV=1;tr|Q7JWQ7|Q7JWQ7_DROME RE01730p OS=Drosophila melanogaster OX=7227 GN=Swim PE=1 SV=1	2	1	1	48.671	430	0	4.4	0	366760
Q9VIV3	Cytoplasmic tRNA 2-thiolation protein 2	CG10189	sp|Q9VIV3|CTU2_DROME Cytoplasmic tRNA 2-thiolation protein 2 OS=Drosophila melanogaster OX=7227 GN=CG10189 PE=2 SV=1	1	1	1	44.772	405	0	4.4	0	113050
Q9VPY8	Probable queuine tRNA-ribosyltransferase	Tgt	sp|Q9VPY8|TGT_DROME Queuine tRNA-ribosyltransferase catalytic subunit OS=Drosophila melanogaster OX=7227 GN=Tgt PE=2 SV=1	1	1	1	47.75	427	0	4.4	0	282970
B6UW20;B6UW17;B6UW08;B6UW05;B6UW04;B6UW03;B6UVZ6;B6UVZ5;B6UVZ0		ald	tr|B6UW20|B6UW20_DROME Altered disjunction (Fragment) OS=Drosophila melanogaster OX=7227 GN=ald PE=4 SV=1;tr|B6UW17|B6UW17_DROME Altered disjunction (Fragment) OS=Drosophila melanogaster OX=7227 GN=ald PE=4 SV=1;tr|B6UW08|B6UW08_DROME Altered disjunction (	9	1	1	32.42	300	0	4.3	0	374980
Q9VP13			tr|Q9VP13|Q9VP13_DROME CR6-interacting factor OS=Drosophila melanogaster OX=7227 GN=CRIF PE=1 SV=1	1	1	1	26.78	232	0	4.3	0	565550
Q9XZ68		betaggt-II	tr|Q9XZ68|Q9XZ68_DROME Geranylgeranyl transferase type-2 subunit beta OS=Drosophila melanogaster OX=7227 GN=betaggt-II PE=1 SV=1	1	1	1	38.542	347	0	4.3	0	0
Q9VK89	Probable tRNA (guanine(26)-N(2))-dimethyltransferase	CG6388	sp|Q9VK89|TRM1_DROME Probable tRNA (guanine(26)-N(2))-dimethyltransferase OS=Drosophila melanogaster OX=7227 GN=CG6388 PE=2 SV=1	1	2	2	64.956	578	0	4.2	0	132190
Q9VGW9;B3DNM7		mRpL37;CG6547-RA	tr|Q9VGW9|Q9VGW9_DROME LD25118p OS=Drosophila melanogaster OX=7227 GN=mRpL37 PE=1 SV=3;tr|B3DNM7|B3DNM7_DROME RH29922p OS=Drosophila melanogaster OX=7227 GN=CG6547-RA PE=2 SV=1	2	1	1	45.757	408	0	4.2	0	0
Q9VA69		PH4alphaEFB	tr|Q9VA69|Q9VA69_DROME Prolyl 4-hydroxylase alpha-related protein PH4[alpha]EFB OS=Drosophila melanogaster OX=7227 GN=PH4alphaEFB PE=1 SV=2	1	1	1	63.115	550	0	4.2	0	110080
Q8T3V6		mRpL47	tr|Q8T3V6|Q8T3V6_DROME AT29239p OS=Drosophila melanogaster OX=7227 GN=mRpL47 PE=1 SV=1	1	1	1	31.712	271	0	4.1	0	517920
Q9V564	Conserved oligomeric Golgi complex subunit 6	CG1968	sp|Q9V564|COG6_DROME Conserved oligomeric Golgi complex subunit 6 OS=Drosophila melanogaster OX=7227 GN=CG1968 PE=2 SV=1	1	1	1	71.205	630	0	4.1	0	611440
A0A0B4KEI6;P18289	Transcription factor AP-1	Jra	tr|A0A0B4KEI6|A0A0B4KEI6_DROME Jun-related antigen, isoform C OS=Drosophila melanogaster OX=7227 GN=Jra PE=3 SV=1;sp|P18289|JRA_DROME Transcription factor AP-1 OS=Drosophila melanogaster OX=7227 GN=Jra PE=1 SV=2	2	1	1	39.869	372	0	4	0	516850
Q9VCU5	Mitochondrial ribosome-associated GTPase 1	CG17141	sp|Q9VCU5|MTG1_DROME Mitochondrial ribosome-associated GTPase 1 OS=Drosophila melanogaster OX=7227 GN=CG17141 PE=1 SV=2	1	1	1	36.545	323	0	4	0	370690
D2NUE8;Q8IQ96;Q5U192;Q9U7D8;Q58CL4;A8JNN0;Q8IQ95;Q8IQ97		pbl	tr|D2NUE8|D2NUE8_DROME MIP14634p OS=Drosophila melanogaster OX=7227 GN=pbl PE=2 SV=1;tr|Q8IQ96|Q8IQ96_DROME Pebble, isoform C OS=Drosophila melanogaster OX=7227 GN=pbl PE=4 SV=1;tr|Q5U192|Q5U192_DROME RE42782p OS=Drosophila melanogaster OX=7227 PE=2 SV=1;t	8	1	1	64.149	567	0	3.9	0	194530
Q7JXB9		EndoG	tr|Q7JXB9|Q7JXB9_DROME Endonuclease G OS=Drosophila melanogaster OX=7227 GN=EndoG PE=1 SV=1	1	1	1	34.645	310	0	3.9	0	359800
Q9VIS4;Q8MRT5	tRNA-dihydrouridine(47) synthase [NAD(P)(+)]	CG10463	tr|Q9VIS4|Q9VIS4_DROME tRNA-dihydrouridine(47) synthase [NAD(P)(+)] OS=Drosophila melanogaster OX=7227 GN=Dmel\CG10463 PE=1 SV=1;tr|Q8MRT5|Q8MRT5_DROME tRNA-dihydrouridine(47) synthase [NAD(P)(+)] OS=Drosophila melanogaster OX=7227 GN=CG10463 PE=2 SV=1	2	1	1	68.024	604	0	3.8	0	228040
Q9VC58		Syx18	tr|Q9VC58|Q9VC58_DROME LD37002p OS=Drosophila melanogaster OX=7227 GN=Syx18 PE=1 SV=1	1	1	1	45.135	395	0	3.8	0	471400
Q9VI13;Q24213;Q24190;B7Z0W0	Non-specific serine/threonine protein kinase	Pak	tr|Q9VI13|Q9VI13_DROME Non-specific serine/threonine protein kinase OS=Drosophila melanogaster OX=7227 GN=Pak PE=2 SV=1;tr|Q24213|Q24213_DROME Non-specific serine/threonine protein kinase OS=Drosophila melanogaster OX=7227 GN=Pak PE=2 SV=1;tr|Q24190|Q24190	4	2	2	76.186	704	0	3.7	0	824320
Q9VDE3;A0A0B4KHK1		slmb	tr|Q9VDE3|Q9VDE3_DROME LD08669p OS=Drosophila melanogaster OX=7227 GN=slmb PE=1 SV=1;tr|A0A0B4KHK1|A0A0B4KHK1_DROME Supernumerary limbs, isoform B OS=Drosophila melanogaster OX=7227 GN=slmb PE=4 SV=1	2	1	1	58.952	510	0	3.7	0	17566
Q8MLV5;Q9W2E3;Q9GSP1;H0RNJ0		NC2alpha;NC2alpha-RA	tr|Q8MLV5|Q8MLV5_DROME GH27814p OS=Drosophila melanogaster OX=7227 GN=NC2alpha PE=2 SV=1;tr|Q9W2E3|Q9W2E3_DROME Negative cofactor 2alpha OS=Drosophila melanogaster OX=7227 GN=NC2alpha PE=1 SV=2;tr|Q9GSP1|Q9GSP1_DROME LD24434p OS=Drosophila melanogaster OX=	4	1	1	33.908	321	0	3.7	0	94653
E4NKG9;Q9VKX6		CG5096-RA;CG5091	tr|E4NKG9|E4NKG9_DROME RT10538p (Fragment) OS=Drosophila melanogaster OX=7227 GN=CG5096-RA PE=2 SV=1;tr|Q9VKX6|Q9VKX6_DROME RE59088p OS=Drosophila melanogaster OX=7227 GN=Dmel\CG5096 PE=2 SV=2	2	1	1	46.465	413	0	3.6	0	777420
Q9VTM5	Dimethyladenosine transferase 1, mitochondrial	mtTFB1	sp|Q9VTM5|TFB1M_DROME Dimethyladenosine transferase 1, mitochondrial OS=Drosophila melanogaster OX=7227 GN=mtTFB1 PE=2 SV=2	1	1	1	38.1	330	0	3.6	0	75800
M9PEY6;Q9VM71;Q95RS5	5-3 exoribonuclease 2 homolog	Rat1	tr|M9PEY6|M9PEY6_DROME 5-3 exoribonuclease OS=Drosophila melanogaster OX=7227 GN=Rat1 PE=1 SV=1;sp|Q9VM71|XRN2_DROME 5-3 exoribonuclease 2 homolog OS=Drosophila melanogaster OX=7227 GN=Rat1 PE=1 SV=2;tr|Q95RS5|Q95RS5_DROME LD13761p OS=Drosophila melano	3	2	2	103.96	908	0	3.5	0	766280
H0RNK7;A9UNB4;Q9W261	RNA polymerase-associated protein Rtf1	Rtf1-RA;CG10955;Rtf1	tr|H0RNK7|H0RNK7_DROME FI16824p1 OS=Drosophila melanogaster OX=7227 GN=Rtf1 PE=1 SV=1;tr|A9UNB4|A9UNB4_DROME LP07508p OS=Drosophila melanogaster OX=7227 GN=CG10955 PE=2 SV=1;sp|Q9W261|RTF1_DROME RNA polymerase-associated protein Rtf1 OS=Drosophila melanoga	3	1	1	87.551	775	0	3.5	0	722600
M9PFV4;Q9VP50			tr|M9PFV4|M9PFV4_DROME Uncharacterized protein, isoform B OS=Drosophila melanogaster OX=7227 GN=Dmel\CG7632 PE=1 SV=1;tr|Q9VP50|Q9VP50_DROME SD17025p OS=Drosophila melanogaster OX=7227 GN=Dmel\CG7632 PE=1 SV=1	2	1	1	35.91	312	0	3.5	0	365270
Q961R5;Q0E980		CG8547	tr|Q961R5|Q961R5_DROME GH09468p OS=Drosophila melanogaster OX=7227 GN=CG8547 PE=2 SV=1;tr|Q0E980|Q0E980_DROME Uncharacterized protein, isoform C OS=Drosophila melanogaster OX=7227 GN=Dmel\CG8547 PE=1 SV=2	2	1	1	63.582	577	0	3.5	0	258960
Q9VJ58;O77047		Faf	tr|Q9VJ58|Q9VJ58_DROME Fas-associated factor 2, isoform A OS=Drosophila melanogaster OX=7227 GN=Faf2 PE=1 SV=1;tr|O77047|O77047_DROME Fas-associated factor OS=Drosophila melanogaster OX=7227 GN=Faf2 PE=2 SV=1	2	1	1	52.96	464	0	3.4	0	470030
Q9XZ53;Q7KN63		OstStt3	tr|Q9XZ53|Q9XZ53_DROME Catalytic subunit 3B of the oligosaccharyltransferase complex OS=Drosophila melanogaster OX=7227 GN=Stt3B PE=1 SV=1;tr|Q7KN63|Q7KN63_DROME GM01838p (Fragment) OS=Drosophila melanogaster OX=7227 GN=Stt3B PE=2 SV=1	2	1	1	87.626	774	0	3.4	0	1725000
Q8SXB3		eap	tr|Q8SXB3|Q8SXB3_DROME GH12334p OS=Drosophila melanogaster OX=7227 GN=eap PE=2 SV=1	1	1	1	33.173	290	0	3.4	0	0
Q95RI2			tr|Q95RI2|Q95RI2_DROME LD28549p OS=Drosophila melanogaster OX=7227 GN=Dmel\CG10973 PE=1 SV=1	1	1	1	34.018	306	0	3.3	0	282530
Q9VVC8;Q8IHE7;C9QPB0		CG6664	tr|Q9VVC8|Q9VVC8_DROME LD23434p OS=Drosophila melanogaster OX=7227 GN=Dmel\CG6664 PE=1 SV=1;tr|Q8IHE7|Q8IHE7_DROME AT08590p OS=Drosophila melanogaster OX=7227 GN=CG6664 PE=2 SV=1;tr|C9QPB0|C9QPB0_DROME FI12105p OS=Drosophila melanogaster OX=7227 PE=2 SV=1	3	1	1	57.806	532	0	3.2	0	633840
Q7KHK9		Strica	tr|Q7KHK9|Q7KHK9_DROME DREAM OS=Drosophila melanogaster OX=7227 GN=Strica PE=1 SV=1	1	1	1	57.448	527	0	3.2	0	313040
Q9VN55		atms	tr|Q9VN55|Q9VN55_DROME Antimeros, isoform A OS=Drosophila melanogaster OX=7227 GN=atms PE=1 SV=1	1	1	1	60.793	538	0	3.2	0	837500
Q86BR6;B7Z0R7		Atg16	tr|Q86BR6|Q86BR6_DROME Autophagy-related 16, isoform C OS=Drosophila melanogaster OX=7227 GN=Atg16 PE=1 SV=1;tr|B7Z0R7|B7Z0R7_DROME Autophagy-related 16, isoform F OS=Drosophila melanogaster OX=7227 GN=Atg16 PE=1 SV=2	2	1	1	67.275	604	0	3.1	0	389570
Q9VNX4;Q8T3P0		P5CDh1	tr|Q9VNX4|Q9VNX4_DROME Delta-1-Pyrroline-5-carboxylate dehydrogenase 1, isoform A OS=Drosophila melanogaster OX=7227 GN=P5CDh1 PE=1 SV=1;tr|Q8T3P0|Q8T3P0_DROME GM01289p OS=Drosophila melanogaster OX=7227 GN=P5CDh1 PE=2 SV=1	2	1	1	63.666	574	0	3.1	0	732410
Q9VV52;Q95RV6		RAF2;CG4877	tr|Q9VV52|Q9VV52_DROME LD37257p OS=Drosophila melanogaster OX=7227 GN=RAF2 PE=1 SV=3;tr|Q95RV6|Q95RV6_DROME LD09503p OS=Drosophila melanogaster OX=7227 GN=CG4877 PE=2 SV=1	2	2	2	125.49	1117	0	3	0	1480200
Q960U8;Q8ST50	O-acyltransferase	mdy	tr|Q960U8|Q960U8_DROME O-acyltransferase OS=Drosophila melanogaster OX=7227 GN=mdy PE=2 SV=1;tr|Q8ST50|Q8ST50_DROME O-acyltransferase OS=Drosophila melanogaster OX=7227 GN=mdy PE=2 SV=1	2	1	1	64.943	565	0	3	0	376630
Q9VBK9;Q960C1		CG5913	tr|Q9VBK9|Q9VBK9_DROME Uncharacterized protein OS=Drosophila melanogaster OX=7227 GN=Dmel\CG5913 PE=1 SV=1;tr|Q960C1|Q960C1_DROME SD08037p OS=Drosophila melanogaster OX=7227 GN=CG5913 PE=2 SV=1	2	1	1	49.967	454	0	2.9	0	207140
Q7K0X3			tr|Q7K0X3|Q7K0X3_DROME Ctr9, isoform A OS=Drosophila melanogaster OX=7227 GN=Ctr9 PE=1 SV=1	1	2	2	130.47	1150	0	2.8	0	1071200
C3KGI3;A1Z9G2		CG6197-RA;fand	tr|C3KGI3|C3KGI3_DROME RE06860p OS=Drosophila melanogaster OX=7227 GN=CG6197-RA PE=2 SV=1;tr|A1Z9G2|A1Z9G2_DROME FI18620p1 OS=Drosophila melanogaster OX=7227 GN=fand PE=1 SV=1	2	1	1	103.35	883	0	2.8	0	814810
Q9VDS6	Surfeit locus protein 6 homolog	Surf6	sp|Q9VDS6|SURF6_DROME Surfeit locus protein 6 homolog OS=Drosophila melanogaster OX=7227 GN=Surf6 PE=1 SV=1	1	1	1	38.134	324	0	2.8	0	877850
Q9VHB5		Vps45	tr|Q9VHB5|Q9VHB5_DROME SD10846p OS=Drosophila melanogaster OX=7227 GN=Vps45 PE=1 SV=1	1	1	1	65.078	574	0	2.8	0	1178200
Q9V677	Proteasome-associated protein ECM29 homolog	CG8858	sp|Q9V677|ECM29_DROME Proteasome-associated protein ECM29 homolog OS=Drosophila melanogaster OX=7227 GN=CG8858 PE=1 SV=1	1	3	3	212.08	1890	0	2.7	0	889290
Q9VIP9;P91663	Condensin complex subunit 2	barr	tr|Q9VIP9|Q9VIP9_DROME Condensin complex subunit 2 OS=Drosophila melanogaster OX=7227 GN=barr PE=1 SV=1;tr|P91663|P91663_DROME Condensin complex subunit 2 OS=Drosophila melanogaster OX=7227 GN=barr PE=2 SV=1	2	1	1	82.761	735	0	2.7	0	281770
Q8SYC4			tr|Q8SYC4|Q8SYC4_DROME RE68566p OS=Drosophila melanogaster OX=7227 GN=Dmel\CG13893 PE=1 SV=1	1	1	1	47.708	407	0	2.7	0	449190
Q9VFL5	Methionine--tRNA ligase, mitochondrial	Aats-met	sp|Q9VFL5|SYMM_DROME Methionine--tRNA ligase, mitochondrial OS=Drosophila melanogaster OX=7227 GN=MetRS-m PE=1 SV=2	1	1	1	65.998	582	0	2.7	0	263810
Q8MT27;M9WDW1;A0A0C5K8A0;P34739	Transcription termination factor 2	lds;lds-RA	tr|Q8MT27|Q8MT27_DROME RE70645p OS=Drosophila melanogaster OX=7227 GN=lds PE=2 SV=1;tr|M9WDW1|M9WDW1_DROME FI21104p1 OS=Drosophila melanogaster OX=7227 GN=lds-RA PE=2 SV=1;tr|A0A0C5K8A0|A0A0C5K8A0_DROME FI21128p1 OS=Drosophila melanogaster OX=7227 GN=lds-R	4	2	2	93.762	835	0	2.6	0	368890
Q8IMG6;O77069;Q7KPL1;O61458;O76259;O62609	Mothers against decapentaplegic homolog	Med	tr|Q8IMG6|Q8IMG6_DROME Mothers against decapentaplegic homolog OS=Drosophila melanogaster OX=7227 GN=Med PE=3 SV=1;tr|O77069|O77069_DROME Mothers against decapentaplegic homolog OS=Drosophila melanogaster OX=7227 GN=Med PE=2 SV=1;tr|Q7KPL1|Q7KPL1_DROME Mot	6	1	1	73.679	697	0	2.6	0	215440
Q9VWE8		Arp10	tr|Q9VWE8|Q9VWE8_DROME Actin-related protein 10, isoform A OS=Drosophila melanogaster OX=7227 GN=Arp10 PE=1 SV=1	1	1	1	42.247	378	0	2.6	0	0
H1ZYE3;Q94533;P91656	Ribosomal protein S6 kinase	S6k	tr|H1ZYE3|H1ZYE3_DROME RPS6-p70-protein kinase (Fragment) OS=Drosophila melanogaster OX=7227 GN=S6k PE=3 SV=1;tr|Q94533|Q94533_DROME Ribosomal protein S6 kinase OS=Drosophila melanogaster OX=7227 GN=S6k PE=1 SV=2;tr|P91656|P91656_DROME Ribosomal protein S6	3	1	1	44.895	395	0	2.5	0	776140
Q9VVU5	COP9 signalosome complex subunit 1b	CSN1b	sp|Q9VVU5|CSN1_DROME COP9 signalosome complex subunit 1b OS=Drosophila melanogaster OX=7227 GN=CSN1b PE=2 SV=1	1	1	1	58.214	525	0	2.5	0	1460300
D0IQH8;M9NDM3;M9PEJ8;M9PBW9;Q9VSL8;Q960C2		rhea-RA;rhea	tr|D0IQH8|D0IQH8_DROME MIP14644p (Fragment) OS=Drosophila melanogaster OX=7227 GN=rhea-RA PE=2 SV=1;tr|M9NDM3|M9NDM3_DROME Rhea, isoform C OS=Drosophila melanogaster OX=7227 GN=rhea PE=1 SV=1;tr|M9PEJ8|M9PEJ8_DROME Rhea, isoform H OS=Drosophila melanogaste	6	2	2	137.06	1283	0	2.4	0	1302400
E4NKI3;P39205	Molybdenum cofactor synthesis protein cinnamon;Molybdopterin adenylyltransferase;Molybdopterin molybdenumtransferase	cin-RA;cin	tr|E4NKI3|E4NKI3_DROME Molybdopterin molybdenumtransferase (Fragment) OS=Drosophila melanogaster OX=7227 GN=cin-RA PE=2 SV=1;sp|P39205|CIN_DROME Molybdenum cofactor synthesis protein cinnamon OS=Drosophila melanogaster OX=7227 GN=cin PE=1 SV=3	2	1	1	40.743	374	0	2.4	0	0
Q9VL91;O44122		zf30C	tr|Q9VL91|Q9VL91_DROME LD23102p OS=Drosophila melanogaster OX=7227 GN=zf30C PE=1 SV=2;tr|O44122|O44122_DROME Zinc finger 30C OS=Drosophila melanogaster OX=7227 GN=zf30C PE=2 SV=1	2	1	1	88.347	777	0	2.4	0	389140
Q9VEV7			tr|Q9VEV7|Q9VEV7_DROME Protein farnesyltransferase subunit beta OS=Drosophila melanogaster OX=7227 GN=FNTB PE=1 SV=1	1	1	1	46.711	419	0	2.4	0	620300
Q8MRI7;Q8SWW0;A0A0B4LEY4;A1Z7K9	PAB-dependent poly(A)-specific ribonuclease subunit PAN2	PAN2	tr|Q8MRI7|Q8MRI7_DROME LD22095p OS=Drosophila melanogaster OX=7227 GN=PAN2 PE=2 SV=1;tr|Q8SWW0|Q8SWW0_DROME LD37466p OS=Drosophila melanogaster OX=7227 GN=PAN2 PE=2 SV=1;tr|A0A0B4LEY4|A0A0B4LEY4_DROME PAN2-PAN3 deadenylation complex catalytic subunit PAN2	4	1	1	72.993	658	0	2.3	0	0
Q7JRE4		MAN1	sp|Q7JRE4|MAN1_DROME Inner nuclear membrane protein Man1 OS=Drosophila melanogaster OX=7227 GN=MAN1 PE=1 SV=1	1	1	1	73.878	650	0	2.3	0	0
Q8MSB1		CG13638	tr|Q8MSB1|Q8MSB1_DROME LD35157p OS=Drosophila melanogaster OX=7227 GN=CG13638 PE=1 SV=1	1	1	1	45.375	394	0	2.3	0	441520
Q95TH3;Q9VV61		CG4638	tr|Q95TH3|Q95TH3_DROME SD04694p OS=Drosophila melanogaster OX=7227 GN=CG4638 PE=2 SV=1;tr|Q9VV61|Q9VV61_DROME Uncharacterized protein OS=Drosophila melanogaster OX=7227 GN=CG4638 PE=1 SV=3	2	1	1	106.04	949	0	2.3	0	88269
Q9VLK8;Q9U1J8		fu2	tr|Q9VLK8|Q9VLK8_DROME FI01024p OS=Drosophila melanogaster OX=7227 GN=prg PE=1 SV=2;tr|Q9U1J8|Q9U1J8_DROME Putative DNA binding protein OS=Drosophila melanogaster OX=7227 GN=prg PE=2 SV=1	2	1	1	63.855	558	0	2.3	0	149740
Q9VJ10		l(2)37Bb	tr|Q9VJ10|Q9VJ10_DROME Lethal (2) 37Bb OS=Drosophila melanogaster OX=7227 GN=l(2)37Bb PE=1 SV=1	1	1	1	56.758	515	0	2.3	0	533210
Q8IG93;Q86NV8;J9XXX0;Q9VF02;Q71V44		Hel89B;Hel89B-RB	tr|Q8IG93|Q8IG93_DROME SD16865p (Fragment) OS=Drosophila melanogaster OX=7227 GN=Hel89B PE=2 SV=1;tr|Q86NV8|Q86NV8_DROME GH12153p (Fragment) OS=Drosophila melanogaster OX=7227 GN=Hel89B PE=2 SV=1;tr|J9XXX0|J9XXX0_DROME SD05972p1 (Fragment) OS=Drosophila me	5	1	1	75.573	673	0	2.2	0	445630
A4V448;Q9W3K5	Glutamate--cysteine ligase	Gclc	tr|A4V448|A4V448_DROME Glutamate-cysteine ligase catalytic subunit, isoform B OS=Drosophila melanogaster OX=7227 GN=Gclc PE=1 SV=1;sp|Q9W3K5|GSH1_DROME Glutamate--cysteine ligase OS=Drosophila melanogaster OX=7227 GN=Gclc PE=2 SV=1	2	1	1	80.745	717	0	2.1	0	627340
Q9VZ82		Aats-leu	tr|Q9VZ82|Q9VZ82_DROME LD44376p OS=Drosophila melanogaster OX=7227 GN=LeuRS-m PE=1 SV=1	1	1	1	99.299	869	0	2.1	0	0
Q9U1J0;Q9VB69;E1JIZ5;E1JIZ4	Malic enzyme	Men-b	tr|Q9U1J0|Q9U1J0_DROME Malic enzyme OS=Drosophila melanogaster OX=7227 GN=Men-b PE=2 SV=1;tr|Q9VB69|Q9VB69_DROME Malic enzyme OS=Drosophila melanogaster OX=7227 GN=Men-b PE=1 SV=1;tr|E1JIZ5|E1JIZ5_DROME Malic enzyme OS=Drosophila melanogaster OX=7227 GN=Me	4	1	1	66.834	604	0	2	0	455300
Q8T3Y5;Q8IMT2		CG10551;CG31099-RA	tr|Q8T3Y5|Q8T3Y5_DROME AT25434p OS=Drosophila melanogaster OX=7227 GN=CG10551 PE=2 SV=1;tr|Q8IMT2|Q8IMT2_DROME FI21747p1 OS=Drosophila melanogaster OX=7227 GN=CG10551 PE=2 SV=1	2	1	1	46.218	400	0	2	0	2842000
Q95RC5			tr|Q95RC5|Q95RC5_DROME LD44506p OS=Drosophila melanogaster OX=7227 GN=Dmel\CG5745 PE=2 SV=1	1	1	1	61.511	546	0	2	0	183790
Q9V3D6	Probable cleavage and polyadenylation specificity factor subunit 2	Cpsf100	sp|Q9V3D6|CPSF2_DROME Probable cleavage and polyadenylation specificity factor subunit 2 OS=Drosophila melanogaster OX=7227 GN=Cpsf100 PE=1 SV=1	1	1	1	85.417	756	0	2	0	337440
Q9VKC2		JhI-21	tr|Q9VKC2|Q9VKC2_DROME Amino acid transporter protein JHI-21 OS=Drosophila melanogaster OX=7227 GN=JhI-21 PE=1 SV=1	1	1	1	54.82	500	0	2	0	0
M9PJQ3;A0A0C5KMR0;M9PHG0;M9PHY4;M9PHV3;Q9VX32;D1Z398	Rho GTPase-activating protein 190	RhoGAPp190;RhoGAPp190-RB;RhoGAPp190-RA	tr|M9PJQ3|M9PJQ3_DROME Rho GTPase activating protein p190, isoform G OS=Drosophila melanogaster OX=7227 GN=RhoGAPp190 PE=1 SV=1;tr|A0A0C5KMR0|A0A0C5KMR0_DROME FI22442p1 OS=Drosophila melanogaster OX=7227 GN=RhoGAPp190-RB PE=2 SV=1;tr|M9PHG0|M9PHG0_DROME Rh	7	2	2	161.23	1398	0	1.9	0	216920
Q8T035;Q9VHC4;A0A0B4KFZ2;Q6AWD5		CG8165	tr|Q8T035|Q8T035_DROME LD34536p OS=Drosophila melanogaster OX=7227 GN=CG8165 PE=2 SV=1;tr|Q9VHC4|Q9VHC4_DROME Uncharacterized protein, isoform A OS=Drosophila melanogaster OX=7227 GN=Dmel\CG8176 PE=1 SV=3;tr|A0A0B4KFZ2|A0A0B4KFZ2_DROME Uncharacterized prot	4	1	1	96.545	924	0	1.9	0	516180
L7RZC6;Q9VZZ9	Protein daughter of sevenless	dos-RA;dos	tr|L7RZC6|L7RZC6_DROME LD26592p1 OS=Drosophila melanogaster OX=7227 GN=dos-RA PE=2 SV=1;sp|Q9VZZ9|DOS_DROME Protein daughter of sevenless OS=Drosophila melanogaster OX=7227 GN=dos PE=1 SV=1	2	1	1	95.535	878	0	1.9	0	702710
O46043	Poly(ADP-ribose) glycohydrolase	Parg	sp|O46043|PARG_DROME Poly(ADP-ribose) glycohydrolase OS=Drosophila melanogaster OX=7227 GN=Parg PE=1 SV=3	1	1	1	81.108	723	0	1.9	0	0
Q8T0J3;Q9V4P1	Actin-binding protein anillin	scra	tr|Q8T0J3|Q8T0J3_DROME GH27072p OS=Drosophila melanogaster OX=7227 GN=scra PE=1 SV=1;sp|Q9V4P1|ANLN_DROME Anillin OS=Drosophila melanogaster OX=7227 GN=scra PE=1 SV=3	2	1	1	66.296	616	0	1.9	0	560350
A1Z8W9;A0A0B4K7N0;A1Z8W8		garz	tr|A1Z8W9|A1Z8W9_DROME Gartenzwerg, isoform A OS=Drosophila melanogaster OX=7227 GN=garz PE=1 SV=1;tr|A0A0B4K7N0|A0A0B4K7N0_DROME Gartenzwerg, isoform C OS=Drosophila melanogaster OX=7227 GN=garz PE=1 SV=1;tr|A1Z8W8|A1Z8W8_DROME Gartenzwerg, isoform B OS=D	3	2	2	194.87	1740	0	1.8	0	400670
I1V4X6;X2J6S0;A8B8J6;A8B8J2;A8B8H8;A8B8H2;A8B8G2;A8B8F9;A8B8F5;A8B8F0;A8B8E7;A8ILH8;A8ILH3;A8ILG9;A8ILG6;A8ILG1;A8ILF7;A8ILF3;A8ILE8;P50535	Protein male-specific lethal-1	msl-1;msl1	tr|I1V4X6|I1V4X6_DROME Male-specific lethal 1 OS=Drosophila melanogaster OX=7227 GN=msl-1 PE=4 SV=1;tr|X2J6S0|X2J6S0_DROME Male-specific lethal 1, isoform B OS=Drosophila melanogaster OX=7227 GN=msl-1 PE=1 SV=1;tr|A8B8J6|A8B8J6_DROME MSL1 OS=Drosophila mel	20	1	1	117.44	1038	0	1.8	0	230680
Q9W2F4		clt	tr|Q9W2F4|Q9W2F4_DROME Cricklet OS=Drosophila melanogaster OX=7227 GN=clt PE=1 SV=1	1	1	1	63.732	562	0	1.8	0	254110
Q7KS07;E1JIV8;A0A0B4KHG2;Q9VC27	Nicastrin	nct	tr|Q7KS07|Q7KS07_DROME Nicastrin, isoform D OS=Drosophila melanogaster OX=7227 GN=Nct PE=1 SV=2;tr|E1JIV8|E1JIV8_DROME Nicastrin, isoform C OS=Drosophila melanogaster OX=7227 GN=Nct PE=1 SV=1;tr|A0A0B4KHG2|A0A0B4KHG2_DROME Nicastrin, isoform E OS=Drosophil	4	1	1	77.675	692	0	1.7	0	558970
Q9VZT8			tr|Q9VZT8|Q9VZT8_DROME Uncharacterized protein OS=Drosophila melanogaster OX=7227 GN=Dmel\CG14964 PE=4 SV=3	1	1	1	160.56	1443	0	1.7	0	0
A1Z6I7;O76755;Q7KN56		BubR1	tr|A1Z6I7|A1Z6I7_DROME Bub1-related kinase OS=Drosophila melanogaster OX=7227 GN=BubR1 PE=1 SV=1;tr|O76755|O76755_DROME Mitotic checkpoint control protein kinase BUB1 OS=Drosophila melanogaster OX=7227 GN=BubR1 PE=2 SV=1;tr|Q7KN56|Q7KN56_DROME LD23835p (Fr	3	1	1	165.06	1460	0	1.6	0	892990
Q9VEX5	Protein asunder	Asun	sp|Q9VEX5|INT13_DROME Protein asunder OS=Drosophila melanogaster OX=7227 GN=Asun PE=1 SV=1	1	1	1	75.727	689	0	1.6	0	234840
Q9VUR2			tr|Q9VUR2|Q9VUR2_DROME LD31322p OS=Drosophila melanogaster OX=7227 GN=Dmel\CG12301 PE=1 SV=2	1	1	1	88.727	771	0	1.6	0	95030
M9PEA7;Q9VRT9;M9PER3			tr|M9PEA7|M9PEA7_DROME Uncharacterized protein, isoform C OS=Drosophila melanogaster OX=7227 GN=Dmel\CG13293 PE=4 SV=1;tr|Q9VRT9|Q9VRT9_DROME Uncharacterized protein, isoform B OS=Drosophila melanogaster OX=7227 GN=Dmel\CG13293 PE=4 SV=3;tr|M9PER3|M9PER3_D	3	1	1	68.357	594	0	1.5	0	825040
P91875	DNA-directed RNA polymerase I subunit RPA1	RpI1	sp|P91875|RPA1_DROME DNA-directed RNA polymerase I subunit RPA1 OS=Drosophila melanogaster OX=7227 GN=RpI1 PE=1 SV=2	1	1	1	185.41	1642	0	1.4	0	957270
Q2XXT6;Q9VZX7		Atg2	tr|Q2XXT6|Q2XXT6_DROME CG1241 (Fragment) OS=Drosophila melanogaster OX=7227 GN=Atg2 PE=4 SV=1;tr|Q9VZX7|Q9VZX7_DROME Autophagy-related 2, isoform A OS=Drosophila melanogaster OX=7227 GN=Atg2 PE=2 SV=1	2	1	1	210.98	1873	0	1.4	0	222790
Q9W374;Q4TWT4		su(r)	tr|Q9W374|Q9W374_DROME Dihydropyrimidine dehydrogenase [NADP(+)] OS=Drosophila melanogaster OX=7227 GN=su(r) PE=1 SV=2;tr|Q4TWT4|Q4TWT4_DROME Dihydropyrimidine dehydrogenase [NADP(+)] OS=Drosophila melanogaster OX=7227 GN=su(r) PE=3 SV=1	2	1	1	111.22	1031	0	1.4	0	517850
X2JGB3;Q9VRP9	E3 ubiquitin-protein ligase Bre1	Bre1	tr|X2JGB3|X2JGB3_DROME E3 ubiquitin protein ligase OS=Drosophila melanogaster OX=7227 GN=Bre1 PE=3 SV=1;sp|Q9VRP9|BRE1_DROME E3 ubiquitin-protein ligase Bre1 OS=Drosophila melanogaster OX=7227 GN=Bre1 PE=1 SV=2	2	1	1	119.06	1044	0	1.3	0	118220
Q8SY33	Protein Gawky	gw	sp|Q8SY33|GAWKY_DROME Protein Gawky OS=Drosophila melanogaster OX=7227 GN=gw PE=1 SV=1	1	1	1	142.97	1384	0	1.1	0	777920
Q2XXV4;Q9VY97;Q9GTU6;Q7YU37;A0A0C5KMR8		mus101;mus101-RA	tr|Q2XXV4|Q2XXV4_DROME CG11156 (Fragment) OS=Drosophila melanogaster OX=7227 GN=mus101 PE=4 SV=1;tr|Q9VY97|Q9VY97_DROME Mutagen-sensitive 101 OS=Drosophila melanogaster OX=7227 GN=mus101 PE=1 SV=1;tr|Q9GTU6|Q9GTU6_DROME BRCT-domain protein MUS101 OS=Drosop	5	1	1	157.05	1412	0	1	0	107920
Q9W485		IntS6	sp|Q9W485|INT6_DROME Integrator complex subunit 6 OS=Drosophila melanogaster OX=7227 GN=IntS6 PE=1 SV=2	1	1	1	137.11	1284	0	1	0	0
O16125;M9PHL6;Q9VYV8;M9PGW8;Q962F2;Q8IR86;M9PHA0		bif	tr|O16125|O16125_DROME Bifocal OS=Drosophila melanogaster OX=7227 GN=bif PE=2 SV=2;tr|M9PHL6|M9PHL6_DROME Bifocal, isoform E OS=Drosophila melanogaster OX=7227 GN=bif PE=1 SV=1;tr|Q9VYV8|Q9VYV8_DROME Bifocal, isoform C OS=Drosophila melanogaster OX=7227 GN	7	1	1	118	1107	0	0.8	0	0
Q4V5E9;Q9VPR5		CG2807	tr|Q4V5E9|Q4V5E9_DROME RH74732p (Fragment) OS=Drosophila melanogaster OX=7227 GN=CG2807 PE=2 SV=1;tr|Q9VPR5|Q9VPR5_DROME Splicing factor 3b subunit 1, isoform A OS=Drosophila melanogaster OX=7227 GN=Sf3b1 PE=1 SV=2	2	1	1	146.7	1316	0	0.8	0	109390
Q8MSU4	Symplekin	Sym	sp|Q8MSU4|SYMPK_DROME Symplekin OS=Drosophila melanogaster OX=7227 GN=Sym PE=1 SV=1	1	1	1	132.08	1165	0	0.8	0	419910
M9PE74;Q9W2U7		nocte	tr|M9PE74|M9PE74_DROME No circadian temperature entrainment, isoform D OS=Drosophila melanogaster OX=7227 GN=nocte PE=1 SV=1;tr|Q9W2U7|Q9W2U7_DROME LP18708p OS=Drosophila melanogaster OX=7227 GN=nocte PE=1 SV=4	2	1	1	235.04	2305	0	0.6	0	907690
Q9VTC1			tr|Q9VTC1|Q9VTC1_DROME LD32732p OS=Drosophila melanogaster OX=7227 GN=DmRH27 PE=1 SV=1	1	4	4	87.252	791	1	7.1	0	1082500
Q9VVW6;M9PI97;Q9GU52		MESR6	tr|Q9VVW6|Q9VVW6_DROME LD22716p OS=Drosophila melanogaster OX=7227 GN=MESR6 PE=1 SV=1;tr|M9PI97|M9PI97_DROME Misexpression suppressor of ras 6, isoform B OS=Drosophila melanogaster OX=7227 GN=MESR6 PE=1 SV=1;tr|Q9GU52|Q9GU52_DROME Misexpression suppressor	3	5	5	53.94	470	3.2	22.6	1111400	1898900
Q9NFR7;Q9VB22;Q9NH88		pins	tr|Q9NFR7|Q9NFR7_DROME Rapsynoid OS=Drosophila melanogaster OX=7227 GN=pins PE=2 SV=1;tr|Q9VB22|Q9VB22_DROME LD33695p OS=Drosophila melanogaster OX=7227 GN=pins PE=1 SV=1;tr|Q9NH88|Q9NH88_DROME Partner of Inscuteable OS=Drosophila melanogaster OX=7227 GN=p	3	6	6	71.455	658	2.3	15.5	1496900	4227000
A0A0B4KHM2;Q9XZ58	COP9 signalosome complex subunit 5	CSN5	tr|A0A0B4KHM2|A0A0B4KHM2_DROME COP9 signalosome subunit 5, isoform B OS=Drosophila melanogaster OX=7227 GN=CSN5 PE=4 SV=1;sp|Q9XZ58|CSN5_DROME COP9 signalosome complex subunit 5 OS=Drosophila melanogaster OX=7227 GN=CSN5 PE=1 SV=1	2	3	3	36.87	325	2.2	14.8	0	1483500
P20353	G protein alpha i subunit	Galphai	sp|P20353|GNAI_DROME G protein alpha i subunit OS=Drosophila melanogaster OX=7227 GN=Galphai PE=1 SV=2	1	4	3	40.595	355	3.1	18.6	3334800	3188900
Q9W1Y0;A0A0B4KFY4;F3YDF1		CG3499-RC	tr|Q9W1Y0|Q9W1Y0_DROME GH14313p OS=Drosophila melanogaster OX=7227 GN=YME1L PE=1 SV=1;tr|A0A0B4KFY4|A0A0B4KFY4_DROME YME1 like ATPase, isoform D OS=Drosophila melanogaster OX=7227 GN=YME1L PE=1 SV=1;tr|F3YDF1|F3YDF1_DROME MIP17311p OS=Drosophila melanogast	3	3	3	80.65	736	1	5.6	1000700	0
X2JGG6;P02517	Heat shock protein 26	Hsp26	tr|X2JGG6|X2JGG6_DROME Heat shock protein 26, isoform B OS=Drosophila melanogaster OX=7227 GN=Hsp26 PE=3 SV=1;sp|P02517|HSP26_DROME Heat shock protein 26 OS=Drosophila melanogaster OX=7227 GN=Hsp26 PE=1 SV=2	2	4	4	22.994	208	7.7	40.4	160630	14624000
Q9VT04;Q9VT03		path	sp|Q9VT04|PATH_DROME Proton-coupled amino acid transporter-like protein pathetic OS=Drosophila melanogaster OX=7227 GN=path PE=1 SV=1;tr|Q9VT03|Q9VT03_DROME Pathetic, isoform E OS=Drosophila melanogaster OX=7227 GN=path PE=1 SV=3	2	4	4	52.055	471	2.8	13.6	98408	5362300
Q9VM57;Q8SZ50;C8VV39;Q7KTL4;F7VJV6;Q7KTL5		sip2;sip2-RD;sip2-RC	tr|Q9VM57|Q9VM57_DROME Septin interacting protein 2, isoform A OS=Drosophila melanogaster OX=7227 GN=sip2 PE=1 SV=2;tr|Q8SZ50|Q8SZ50_DROME RE16905p OS=Drosophila melanogaster OX=7227 GN=sip2 PE=2 SV=1;tr|C8VV39|C8VV39_DROME AT05639p OS=Drosophila melanogas	6	3	3	68.895	625	2.2	10.6	541940	1333700
Q9V460	Transcription elongation factor SPT5	Spt5	sp|Q9V460|SPT5H_DROME Transcription elongation factor SPT5 OS=Drosophila melanogaster OX=7227 GN=Spt5 PE=1 SV=1	1	6	6	119.44	1078	2.1	8.9	769940	4355000
Q8IPZ5;Q9VQJ6			tr|Q8IPZ5|Q8IPZ5_DROME Uncharacterized protein, isoform B OS=Drosophila melanogaster OX=7227 GN=Dmel\CG9641 PE=1 SV=1;tr|Q9VQJ6|Q9VQJ6_DROME LD20423p OS=Drosophila melanogaster OX=7227 GN=Dmel\CG9641 PE=1 SV=1	2	4	4	49.998	443	2.3	9.5	1314500	1241200
Q9VC99;D2NUI4;Q8MRJ1;B7Z0P8	Probable uridine-cytidine kinase	CG6364;CG6364-RB	sp|Q9VC99|UCK_DROME Uridine-cytidine kinase OS=Drosophila melanogaster OX=7227 GN=Uck PE=2 SV=1;tr|D2NUI4|D2NUI4_DROME MIP01067p OS=Drosophila melanogaster OX=7227 GN=CG6364-RB PE=2 SV=1;tr|Q8MRJ1|Q8MRJ1_DROME LD13909p OS=Drosophila melanogaster OX=7227 GN	4	3	3	29.213	260	3.8	15.4	0	165170
Q9VRE0;B3DN57		CG1518-RA	tr|Q9VRE0|Q9VRE0_DROME Catalytic subunit 3A of the oligosaccharyltransferase complex, isoform A OS=Drosophila melanogaster OX=7227 GN=Stt3A PE=1 SV=1;tr|B3DN57|B3DN57_DROME LD39332p (Fragment) OS=Drosophila melanogaster OX=7227 GN=CG1518-RA PE=2 SV=1	2	3	3	80.668	713	1.3	5.2	0	1194200
Q8IQW2;Q9VWD1;C1C592		COX6B;CG14235-RA	tr|Q8IQW2|Q8IQW2_DROME Cytochrome c oxidase subunit OS=Drosophila melanogaster OX=7227 GN=COX6B PE=1 SV=1;tr|Q9VWD1|Q9VWD1_DROME Cytochrome c oxidase subunit OS=Drosophila melanogaster OX=7227 GN=COX6B PE=1 SV=2;tr|C1C592|C1C592_DROME GH28726p (Fragment) O	3	4	4	9.2864	77	15.6	61	1386100	4975100
Q9V3G3	Peptidyl-prolyl cis-trans isomerase E	cyp33	sp|Q9V3G3|PPIE_DROME Peptidyl-prolyl cis-trans isomerase E OS=Drosophila melanogaster OX=7227 GN=cyp33 PE=1 SV=1	1	3	3	33.276	300	4.7	18	2878500	1139000
Q8T6B9;A4V193	Poly(U)-binding-splicing factor half pint	pUf68	sp|Q8T6B9|PUF68_DROME Poly(U)-binding-splicing factor half pint OS=Drosophila melanogaster OX=7227 GN=hfp PE=1 SV=2	2	3	3	67.939	637	1.9	7.2	410990	989760
Q24090		Snr1	tr|Q24090|Q24090_DROME GH08712p OS=Drosophila melanogaster OX=7227 GN=Snr1 PE=1 SV=2	1	3	3	41.911	370	3.5	13.2	1451000	1426500
A0A0B4LHV4;H1UUJ8;A0A0B4KGX1;Q01989	Myosin heavy chain 95F	jar;jar-RG	tr|A0A0B4LHV4|A0A0B4LHV4_DROME Jaguar, isoform N OS=Drosophila melanogaster OX=7227 GN=jar PE=1 SV=1;tr|H1UUJ8|H1UUJ8_DROME FI18104p1 OS=Drosophila melanogaster OX=7227 GN=jar PE=1 SV=1;tr|A0A0B4KGX1|A0A0B4KGX1_DROME Jaguar, isoform L OS=Drosophila melanog	4	3	3	141.76	1238	1.2	4.5	806570	2214400
X2J9R2;Q9V3D2	Oxygen-dependent coproporphyrinogen-III oxidase	Coprox	tr|X2J9R2|X2J9R2_DROME Coproporphyrinogen oxidase, isoform B OS=Drosophila melanogaster OX=7227 GN=Coprox PE=4 SV=1;sp|Q9V3D2|HEM6_DROME Oxygen-dependent coproporphyrinogen-III oxidase OS=Drosophila melanogaster OX=7227 GN=Coprox PE=2 SV=1	2	9	9	44.419	390	7.9	29.2	1710700	6674200
Q9VL71;O61646		Srp54	tr|Q9VL71|Q9VL71_DROME LD29830p OS=Drosophila melanogaster OX=7227 GN=Srp54 PE=1 SV=1;tr|O61646|O61646_DROME Splicing factor SRp54 OS=Drosophila melanogaster OX=7227 GN=Srp54 PE=2 SV=3	2	3	3	58.365	513	2.9	10.7	323440	2475900
A0A0B4KFW0;Q8T0S6	Serine/threonine-protein kinase hippo	hpo	tr|A0A0B4KFW0|A0A0B4KFW0_DROME Hippo, isoform B OS=Drosophila melanogaster OX=7227 GN=hpo PE=4 SV=1;sp|Q8T0S6|HIPPO_DROME Serine/threonine-protein kinase hippo OS=Drosophila melanogaster OX=7227 GN=hpo PE=1 SV=1	2	2	2	75.109	669	1.9	6.9	854270	1096100
Q9VVI0		U4-U6-60K	tr|Q9VVI0|Q9VVI0_DROME SD09427p OS=Drosophila melanogaster OX=7227 GN=U4-U6-60K PE=1 SV=1	1	3	3	61.563	553	2.5	9	0	589330
H5V8F3;Q9VN93	Putative cysteine proteinase CG12163	CG12163-RB;CG12163	tr|H5V8F3|H5V8F3_DROME FI18603p1 OS=Drosophila melanogaster OX=7227 GN=CG12163-RB PE=2 SV=1;sp|Q9VN93|CPR1_DROME Putative cysteine proteinase CG12163 OS=Drosophila melanogaster OX=7227 GN=CG12163 PE=2 SV=2	2	5	5	53.545	475	4.6	16.4	3004600	2174100
Q4QQC4;Q0KIB3			tr|Q4QQC4|Q4QQC4_DROME Histone acetyltransferase type B catalytic subunit OS=Drosophila melanogaster OX=7227 PE=2 SV=1;tr|Q0KIB3|Q0KIB3_DROME Histone acetyltransferase type B catalytic subunit OS=Drosophila melanogaster OX=7227 GN=Hat1 PE=1 SV=1	2	4	4	47.976	405	3.2	11.4	862070	4502600
A1YKB1;A1YKA8;A1YKA7;A1YKA5;A1YKA3;A1YKA1;A8JV18;Q9VXE6	Nuclear pore complex protein Nup153	Nup153	tr|A1YKB1|A1YKB1_DROME Nup153 (Fragment) OS=Drosophila melanogaster OX=7227 GN=Nup153 PE=4 SV=1;tr|A1YKA8|A1YKA8_DROME Nup153 (Fragment) OS=Drosophila melanogaster OX=7227 GN=Nup153 PE=4 SV=1;tr|A1YKA7|A1YKA7_DROME Nup153 (Fragment) OS=Drosophila melanogas	8	3	3	86.858	796	2	6.9	416080	1576600
A1ZA05;Q9GSP5;Q0E965;Q95SW3;C5WLP3;G2J5W6;A0A0B4KF69;Q6NP56;C4JC89		SRPK;SRPK-RC;SRPK-RA	tr|A1ZA05|A1ZA05_DROME SR protein kinase, isoform C OS=Drosophila melanogaster OX=7227 GN=SRPK PE=1 SV=1;tr|Q9GSP5|Q9GSP5_DROME SR protein kinase 1 OS=Drosophila melanogaster OX=7227 GN=SRPK PE=2 SV=1;tr|Q0E965|Q0E965_DROME SR protein kinase, isoform A OS=	9	3	3	68.054	607	2.3	7.9	953590	804430
Q32KE6;B5RJQ0;Q95028	L-lactate dehydrogenase	ImpL3	tr|Q32KE6|Q32KE6_DROME L-lactate dehydrogenase OS=Drosophila melanogaster OX=7227 GN=ImpL3 PE=2 SV=1;tr|B5RJQ0|B5RJQ0_DROME L-lactate dehydrogenase OS=Drosophila melanogaster OX=7227 GN=Ldh PE=1 SV=1;sp|Q95028|LDH_DROME L-lactate dehydrogenase OS=Drosophil	3	3	3	35.546	332	6	20.5	766080	1633000
Q9VR42			tr|Q9VR42|Q9VR42_DROME Serine/threonine-protein kinase RIO3 OS=Drosophila melanogaster OX=7227 GN=Dmel\CG3008 PE=1 SV=1	1	2	2	69.277	603	1.8	6.1	372500	436480
Q9VE85;B5RJQ1;Q8SYC6		Nup43;CG7671-RA	tr|Q9VE85|Q9VE85_DROME Nucleoporin 43kD OS=Drosophila melanogaster OX=7227 GN=Nup43 PE=1 SV=1;tr|B5RJQ1|B5RJQ1_DROME FI09332p (Fragment) OS=Drosophila melanogaster OX=7227 GN=CG7671-RA PE=2 SV=1	3	3	3	40.148	358	3.6	12	948230	1732500
Q9W5X0;Q95RH7;F0JAF7		Rab35	tr|Q9W5X0|Q9W5X0_DROME LD21953p OS=Drosophila melanogaster OX=7227 GN=Rab35 PE=1 SV=1;tr|Q95RH7|Q95RH7_DROME LD28840p OS=Drosophila melanogaster OX=7227 GN=Rab35 PE=2 SV=1;tr|F0JAF7|F0JAF7_DROME MIP14774p OS=Drosophila melanogaster OX=7227 GN=Rab35 PE=1 SV	3	3	3	22.862	201	4.5	14.9	1920300	722420
X2JA43;Q9W590	Large subunit GTPase 1 homolog	Ns3	tr|X2JA43|X2JA43_DROME Nucleostemin 3, isoform B OS=Drosophila melanogaster OX=7227 GN=Ns3 PE=4 SV=1;sp|Q9W590|LSG1_DROME Large subunit GTPase 1 homolog OS=Drosophila melanogaster OX=7227 GN=Ns3 PE=1 SV=1	2	2	2	70.245	606	1.3	4.3	88253	319240
Q95RA9		GILT1	sp|Q95RA9|GILT1_DROME GILT-like protein 1 OS=Drosophila melanogaster OX=7227 GN=GILT1 PE=1 SV=1	1	3	3	27.691	250	4.8	15.6	341060	1613300
Q95RK8;Q9W329		Gga	tr|Q95RK8|Q95RK8_DROME LD22310p OS=Drosophila melanogaster OX=7227 GN=Gga PE=2 SV=1;tr|Q9W329|Q9W329_DROME Golgi-localized, gamma-adaptin ear containing, ARF binding protein OS=Drosophila melanogaster OX=7227 GN=Gga PE=1 SV=2	2	2	2	55.516	505	2.8	9.1	179310	634430
Q9VP46;M9PIF1			tr|Q9VP46|Q9VP46_DROME GH16847p OS=Drosophila melanogaster OX=7227 GN=Q9VP46 PE=1 SV=1;tr|M9PIF1|M9PIF1_DROME Uncharacterized protein, isoform B OS=Drosophila melanogaster OX=7227 GN=Dmel\CG7324 PE=1 SV=1	2	6	6	147.26	1291	2	6.4	886500	2380100
M9PFB2;M9PCB7;M9PFF9;M9PFG3;Q9VTZ0;M9PI44;M9PF14;M9PF20		tral	tr|M9PFB2|M9PFB2_DROME Trailer hitch, isoform E OS=Drosophila melanogaster OX=7227 GN=tral PE=1 SV=1;tr|M9PCB7|M9PCB7_DROME Trailer hitch, isoform G OS=Drosophila melanogaster OX=7227 GN=tral PE=1 SV=1;tr|M9PFF9|M9PFF9_DROME Trailer hitch, isoform D OS=Dro	8	5	5	68.303	642	4.2	13.4	6086900	8864700
Q9VXV6;Q9NHD7		Scamp	tr|Q9VXV6|Q9VXV6_DROME Secretory carrier-associated membrane protein OS=Drosophila melanogaster OX=7227 GN=Scamp PE=1 SV=1;tr|Q9NHD7|Q9NHD7_DROME Secretory carrier-associated membrane protein OS=Drosophila melanogaster OX=7227 GN=Scamp PE=2 SV=1	2	2	2	38.543	343	3.2	10.2	2823100	1531500
Q9VFS8	26S proteasome non-ATPase regulatory subunit 9	CG9588	sp|Q9VFS8|PSMD9_DROME 26S proteasome non-ATPase regulatory subunit 9 OS=Drosophila melanogaster OX=7227 GN=CG9588 PE=1 SV=1	1	3	3	23.898	220	5	15.9	0	1027000
A8E6L6;Q9V6X7	GDP-fucose protein O-fucosyltransferase 1	O-fut1	tr|A8E6L6|A8E6L6_DROME FI01906p OS=Drosophila melanogaster OX=7227 GN=O-fut1 PE=1 SV=1;sp|Q9V6X7|OFUT1_DROME GDP-fucose protein O-fucosyltransferase 1 OS=Drosophila melanogaster OX=7227 GN=O-fut1 PE=1 SV=1	2	4	4	46.834	402	5.2	16.4	782210	1561500
Q8T045;A0A0B4KGR5	O-glucosyltransferase rumi	rumi	sp|Q8T045|RUMI_DROME O-glucosyltransferase rumi OS=Drosophila melanogaster OX=7227 GN=rumi PE=1 SV=1;tr|A0A0B4KGR5|A0A0B4KGR5_DROME Rumi, isoform B OS=Drosophila melanogaster OX=7227 GN=rumi PE=4 SV=1	2	3	3	47.735	411	3.2	10	1671700	1584800
Q8MQQ9;C3KKC8;A1Z9K0		CG6701;CG6701-RA	tr|Q8MQQ9|Q8MQQ9_DROME LD17208p (Fragment) OS=Drosophila melanogaster OX=7227 GN=CG6701 PE=2 SV=1;tr|C3KKC8|C3KKC8_DROME MIP09682p OS=Drosophila melanogaster OX=7227 GN=CG6701-RA PE=2 SV=1;tr|A1Z9K0|A1Z9K0_DROME Uncharacterized protein, isoform B OS=Drosop	3	3	3	143.28	1261	0.8	2.5	0	527690
M9PF42;Q9VLT9;Q86M30;M9NEC0;D3DML3		Cka	tr|M9PF42|M9PF42_DROME Connector of kinase to AP-1, isoform G OS=Drosophila melanogaster OX=7227 GN=Cka PE=1 SV=1;tr|Q9VLT9|Q9VLT9_DROME Connector of kinase to AP-1, isoform A OS=Drosophila melanogaster OX=7227 GN=Cka PE=1 SV=2;tr|Q86M30|Q86M30_DROME WD-40	5	3	3	77.105	722	2.5	7.8	1860800	2427600
Q9VRG8			tr|Q9VRG8|Q9VRG8_DROME GH01474p OS=Drosophila melanogaster OX=7227 GN=Dmel\CG1486 PE=1 SV=1	1	2	2	91.521	852	1.8	5.6	338490	1367900
A0A0B4K891;Q7K581			tr|A0A0B4K891|A0A0B4K891_DROME Uncharacterized protein, isoform E OS=Drosophila melanogaster OX=7227 GN=Dmel\CG8963 PE=1 SV=1;tr|Q7K581|Q7K581_DROME SD01637p OS=Drosophila melanogaster OX=7227 GN=Dmel\CG8963 PE=1 SV=1	2	2	2	58.357	520	2.5	7.7	639170	1108200
Q9VG73	Interleukin enhancer-binding factor 2 homolog	CG5641	sp|Q9VG73|ILF2_DROME Interleukin enhancer-binding factor 2 homolog OS=Drosophila melanogaster OX=7227 GN=CG5641 PE=2 SV=1	1	4	4	43.657	396	4.5	13.6	1150300	1946600
M9PFV9;P20232	Transcription elongation factor S-II	TfIIS	tr|M9PFV9|M9PFV9_DROME RNA polymerase II elongation factor, isoform B OS=Drosophila melanogaster OX=7227 GN=TfIIS PE=4 SV=1;sp|P20232|TFS2_DROME Transcription elongation factor S-II OS=Drosophila melanogaster OX=7227 GN=TfIIS PE=2 SV=1	2	5	5	34.3	313	8	24	3726200	2413800
A1Z9J3;A0A0B4K718;O96936;E1JH64;A1Z9J2;Q7KJN8;A1Z9J0;B7YZG4;B7YZG2;B7YZG3;A1Z9I8;E1JH62;A1Z9I9;A0A0B4K7P8;A0A0B4K7Y9;A0A0B4K869;E1JH65;A0A0B4K788;A0A0B4K867;B7YZG6;B7YZG5;E1JH63;A1Z9J1;Q7KAJ2;O77291		shot	tr|A1Z9J3|A1Z9J3_DROME Short stop, isoform H OS=Drosophila melanogaster OX=7227 GN=shot PE=1 SV=1;tr|A0A0B4K718|A0A0B4K718_DROME Short stop, isoform AB OS=Drosophila melanogaster OX=7227 GN=shot PE=1 SV=1;tr|O96936|O96936_DROME Kakapo (Fragment) OS=Drosoph	25	4	4	989.54	8805	0.3	0.9	152730	824800
X2J564;Q9VLT1	Protein MON2 homolog	mon2	tr|X2J564|X2J564_DROME Monensin sensitivity 2, isoform C OS=Drosophila melanogaster OX=7227 GN=mon2 PE=4 SV=1;sp|Q9VLT1|MON2_DROME Protein MON2 homolog OS=Drosophila melanogaster OX=7227 GN=mon2 PE=2 SV=4	2	3	3	186.99	1684	0.8	2.4	1326900	1521600
A0A126GUQ5;Q9Y0Y6	Nuclear receptor-binding protein homolog	Madm	tr|A0A126GUQ5|A0A126GUQ5_DROME MLF1-adaptor molecule, isoform B OS=Drosophila melanogaster OX=7227 GN=Madm PE=4 SV=1;sp|Q9Y0Y6|NRBP_DROME Nuclear receptor-binding protein homolog OS=Drosophila melanogaster OX=7227 GN=Madm PE=1 SV=1	2	2	2	70.507	637	1.7	5	0	888730
Q8IRJ9;Q8IGQ5;Q9W0U0		Gyk	tr|Q8IRJ9|Q8IRJ9_DROME Glycerol kinase 1, isoform B OS=Drosophila melanogaster OX=7227 GN=Gk1 PE=1 SV=1;tr|Q8IGQ5|Q8IGQ5_DROME RE46914p OS=Drosophila melanogaster OX=7227 GN=Gk1 PE=2 SV=1;tr|Q9W0U0|Q9W0U0_DROME GH12641p OS=Drosophila melanogaster OX=7227 G	3	3	3	51.827	474	3.6	10.5	0	1794700
Q5G1W2;M9PEL3;O61538;Q9VS54;O61539		qm	tr|Q5G1W2|Q5G1W2_DROME Quemao protein (Fragment) OS=Drosophila melanogaster OX=7227 GN=qm PE=4 SV=1;tr|M9PEL3|M9PEL3_DROME Quemao, isoform C OS=Drosophila melanogaster OX=7227 GN=qm PE=1 SV=1;tr|O61538|O61538_DROME Geranylgeranyl pyrophosphate synthase OS=	5	2	2	8.5759	74	13.5	39.2	119350	484820
Q9VCH5;Q86G43;Q868A8;Q867W7;Q867M7;Q867M2;Q867H5		Nup98-96	sp|Q9VCH5|NUP98_DROME Nuclear pore complex protein Nup98-Nup96 OS=Drosophila melanogaster OX=7227 GN=Nup98-96 PE=1 SV=3;tr|Q86G43|Q86G43_DROME Nucleoporin 98-96 (Fragment) OS=Drosophila melanogaster OX=7227 GN=Nup98-96 PE=4 SV=1;tr|Q868A8|Q868A8_DROME Nucl	7	6	3	210.14	1960	1.9	5.5	1062300	2492200
M9MRM4;Q9W0I6	Phosphatidylinositide phosphatase SAC1	Sac1	tr|M9MRM4|M9MRM4_DROME Sac1 phosphatase, isoform B OS=Drosophila melanogaster OX=7227 GN=Sac1 PE=4 SV=1;sp|Q9W0I6|SAC1_DROME Phosphatidylinositide phosphatase SAC1 OS=Drosophila melanogaster OX=7227 GN=Sac1 PE=2 SV=1	2	39	39	67.767	592	21.6	61.5	4630200	1175800000
B5RJ67;Q9I7K0;A0A0B4KG85	Microtubule-associated protein Jupiter	Jupiter-RD;Jupiter	tr|B5RJ67|B5RJ67_DROME FI07631p (Fragment) OS=Drosophila melanogaster OX=7227 GN=Jupiter-RD PE=2 SV=1;sp|Q9I7K0|JUPIT_DROME Microtubule-associated protein Jupiter OS=Drosophila melanogaster OX=7227 GN=Jupiter PE=1 SV=2	3	3	3	24.452	230	8.3	23.5	750430	5263300
Q9VK59			tr|Q9VK59|Q9VK59_DROME LD23647p OS=Drosophila melanogaster OX=7227 GN=Dmel\CG5787 PE=1 SV=2	1	5	5	100.26	950	2.8	7.9	1563000	3536500
M9MRT5;Q4TZM6;Q27IS7;Q27IS6;X2JAB1;Q8IP72;X2J5X6;Q9VJY9		loqs	tr|M9MRT5|M9MRT5_DROME Loquacious, isoform D OS=Drosophila melanogaster OX=7227 GN=loqs PE=1 SV=1;tr|Q4TZM6|Q4TZM6_DROME Loquacious OS=Drosophila melanogaster OX=7227 GN=loqs PE=1 SV=1;tr|Q27IS7|Q27IS7_DROME R3D1 (Fragment) OS=Drosophila melanogaster OX=72	8	2	2	38.455	359	3.3	9.2	130950	936190
Q9VV51;D5AEK7;Q961F9			tr|Q9VV51|Q9VV51_DROME RE10780p OS=Drosophila melanogaster OX=7227 GN=Agpat3 PE=1 SV=1;tr|D5AEK7|D5AEK7_DROME MIP21173p OS=Drosophila melanogaster OX=7227 GN=Agpat3 PE=1 SV=1;tr|Q961F9|Q961F9_DROME GEO04450p1 OS=Drosophila melanogaster OX=7227 GN=Agpat3 PE	3	5	5	44.397	386	5.7	15.8	2031100	3050000
Q9VVL5		CG5567-RA	tr|Q9VVL5|Q9VVL5_DROME FI11325p OS=Drosophila melanogaster OX=7227 GN=Dmel\CG5567 PE=1 SV=1	1	2	2	36.378	330	4.8	13.3	98899	940900
Q9VKD3	Probable cysteine desulfurase, mitochondrial	CG12264	sp|Q9VKD3|NFS1_DROME Probable cysteine desulfurase, mitochondrial OS=Drosophila melanogaster OX=7227 GN=CG12264 PE=2 SV=1	1	7	7	51.074	462	6.9	19	5276800	4506800
A4V0S1;Q24509	Syntaxin-5	Syx5	tr|A4V0S1|A4V0S1_DROME Syntaxin 5, isoform B OS=Drosophila melanogaster OX=7227 GN=Syx5 PE=1 SV=1;sp|Q24509|STX5_DROME Syntaxin-5 OS=Drosophila melanogaster OX=7227 GN=Syx5 PE=2 SV=2	2	2	2	51.849	467	2.6	7.1	1268900	1123600
Q7KMJ6		nito	sp|Q7KMJ6|NITO_DROME RNA-binding protein spenito OS=Drosophila melanogaster OX=7227 GN=nito PE=1 SV=1	1	3	3	89.052	793	1.1	3	0	747370
Q8MSR4;Q9GQ88;Q8MPP2;A1ZA22;Q95SC4		eIF2B-gamma;eIF2B-gamma-RA	tr|Q8MSR4|Q8MSR4_DROME SD04737p OS=Drosophila melanogaster OX=7227 GN=eIF2Bgamma PE=2 SV=1;tr|Q9GQ88|Q9GQ88_DROME Eukaryotic initiation factor eIF2B gamma subunit OS=Drosophila melanogaster OX=7227 GN=eIF2Bgamma PE=2 SV=1;tr|Q8MPP2|Q8MPP2_DROME eIF2B-gamma	5	4	4	50.627	455	5.1	13.8	550280	1069700
Q9VNI9			tr|Q9VNI9|Q9VNI9_DROME IP18173p OS=Drosophila melanogaster OX=7227 GN=Dmel\CG2023 PE=1 SV=1	1	2	2	25.695	227	8.8	23.8	1658100	1020800
Q9VGV8			tr|Q9VGV8|Q9VGV8_DROME GM03430p OS=Drosophila melanogaster OX=7227 GN=Dmel\CG4511 PE=2 SV=1	1	2	2	25.109	216	6	16.2	330430	1053700
Q1EBY0;Q9VDE2;Q8T8S4;Q1EC44		CG5793	tr|Q1EBY0|Q1EBY0_DROME IP15522p OS=Drosophila melanogaster OX=7227 GN=CG5793 PE=2 SV=1;tr|Q9VDE2|Q9VDE2_DROME Uncharacterized protein, isoform B OS=Drosophila melanogaster OX=7227 GN=FBgn0038858 PE=1 SV=3;tr|Q8T8S4|Q8T8S4_DROME AT31109p OS=Drosophila melan	4	3	3	14.135	132	13.6	36.4	392330	951950
Q86BQ4;Q8STA5			tr|Q86BQ4|Q86BQ4_DROME Uncharacterized protein, isoform B OS=Drosophila melanogaster OX=7227 GN=Dmel\CG2862 PE=1 SV=1;tr|Q8STA5|Q8STA5_DROME RH02823p OS=Drosophila melanogaster OX=7227 GN=Dmel\CG2862 PE=1 SV=1	2	5	5	13.845	126	18.3	48.4	9243800	7339500
U3Q053;Q9VDQ7	Phagocyte signaling-impaired protein	psidin-RA;psidin	tr|U3Q053|U3Q053_DROME FI24217p1 OS=Drosophila melanogaster OX=7227 GN=psidin-RA PE=2 SV=1;sp|Q9VDQ7|NAA25_DROME Phagocyte signaling-impaired protein OS=Drosophila melanogaster OX=7227 GN=psidin PE=2 SV=1	2	6	6	109.11	948	3.2	8.4	805610	3199400
A0A0B4KHJ5;D5SHR2;Q9VFC8	Glycogen [starch] synthase	GlyS;CG6904-RA	tr|A0A0B4KHJ5|A0A0B4KHJ5_DROME Glycogen [starch] synthase OS=Drosophila melanogaster OX=7227 GN=GlyS PE=1 SV=1;tr|D5SHR2|D5SHR2_DROME Glycogen [starch] synthase OS=Drosophila melanogaster OX=7227 GN=CG6904-RA PE=2 SV=1;sp|Q9VFC8|GYS_DROME Glycogen [starch]	3	7	7	79.233	689	5.7	14.9	1388900	5261900
Q7K519		RagC-D	tr|Q7K519|Q7K519_DROME GH16429p OS=Drosophila melanogaster OX=7227 GN=RagC-D PE=1 SV=1	1	2	2	43.965	385	2.3	6	0	690180
E2QCZ9;Q7JZB4	Mannose-1-phosphate guanyltransferase beta	CG1129	tr|E2QCZ9|E2QCZ9_DROME Uncharacterized protein, isoform B OS=Drosophila melanogaster OX=7227 GN=Dmel\CG1129 PE=1 SV=1;sp|Q7JZB4|GMPPB_DROME Mannose-1-phosphate guanyltransferase beta OS=Drosophila melanogaster OX=7227 GN=CG1129 PE=1 SV=1	2	4	4	40.448	369	7.6	19.5	3428700	5351300
X2JE34;Q8IR13;Q9VXF8;E8NH88;Q7KUX7;Q29R50;X2JC79;Q26272		Rbp2;Rbp2-RB	tr|X2JE34|X2JE34_DROME Eukaryotic translation initiation factor 4H1, isoform E OS=Drosophila melanogaster OX=7227 GN=eIF4H1 PE=1 SV=1;tr|Q8IR13|Q8IR13_DROME Eukaryotic translation initiation factor 4H1, isoform B OS=Drosophila melanogaster OX=7227 GN=eIF4H	8	7	7	34.23	317	10.7	27.1	4233200	9652600
Q9VYD5	Branched-chain-amino-acid aminotransferase		tr|Q9VYD5|Q9VYD5_DROME Branched-chain-amino-acid aminotransferase OS=Drosophila melanogaster OX=7227 GN=cg1673 PE=1 SV=2	1	7	7	49.536	443	8.6	21.7	3899100	9300200
Q9VLM9			tr|Q9VLM9|Q9VLM9_DROME GH05949p OS=Drosophila melanogaster OX=7227 GN=Dmel\CG17294 PE=1 SV=1	1	2	2	28.013	255	4.7	11.8	361510	708200
D5SHM9;E3CTS3;Q8IGH3;A1Z6Z3;A0A0B4KEE1;Q7JR61;A0A0B4KEL0;A0A0B4KF99;A4UZ69;A1Z6Z4;A0A0C4FEI5;A0A0C4DHC8;Q8T0K8	Aldehyde dehydrogenase	Aldh-III-RE;Aldh-III-RI;Aldh-III	tr|D5SHM9|D5SHM9_DROME Aldehyde dehydrogenase OS=Drosophila melanogaster OX=7227 GN=Aldh-III-RE PE=2 SV=1;tr|E3CTS3|E3CTS3_DROME Aldehyde dehydrogenase OS=Drosophila melanogaster OX=7227 GN=Aldh-III-RI PE=2 SV=1;tr|Q8IGH3|Q8IGH3_DROME Aldehyde dehydrogenas	13	2	2	47.938	431	2.6	6.5	673720	1182800
Q9VBY8		Unc-13-4B	sp|Q9VBY8|UN13B_DROME Protein unc-13 homolog 4B OS=Drosophila melanogaster OX=7227 GN=stac PE=1 SV=5	1	2	2	131.92	1153	1	2.5	116360	451990
Q9VW09	E3 ubiquitin-protein ligase listerin	l(3)76BDr	sp|Q9VW09|LTN1_DROME E3 ubiquitin-protein ligase listerin OS=Drosophila melanogaster OX=7227 GN=Ltn1 PE=1 SV=2	1	2	2	198.64	1747	0.8	2	231520	519870
Q9VX98	Density-regulated protein homolog	DENR	sp|Q9VX98|DENR_DROME Density-regulated protein homolog OS=Drosophila melanogaster OX=7227 GN=DENR PE=1 SV=3	1	2	2	21.349	189	5.3	13.2	792390	676110
Q7PLL6			tr|Q7PLL6|Q7PLL6_DROME Uncharacterized protein, isoform A OS=Drosophila melanogaster OX=7227 GN=Dmel\CG17514 PE=1 SV=2	1	7	7	293.91	2630	1.9	4.7	396550	2134100
Q9VQR2;A0AQ24		ND-PDSW;CG8844	tr|Q9VQR2|Q9VQR2_DROME CG8844 protein OS=Drosophila melanogaster OX=7227 GN=ND-PDSW PE=1 SV=1;tr|A0AQ24|A0AQ24_DROME CG8844 protein OS=Drosophila melanogaster OX=7227 GN=CG8844 PE=4 SV=1	2	2	2	18.918	159	6.9	17	1198600	726920
M9PG43;Q9NBK5	Serine/threonine-protein kinase tricorner	trc	tr|M9PG43|M9PG43_DROME Tricornered, isoform B OS=Drosophila melanogaster OX=7227 GN=trc PE=3 SV=1;sp|Q9NBK5|TRC_DROME Serine/threonine-protein kinase tricorner OS=Drosophila melanogaster OX=7227 GN=trc PE=1 SV=1	2	2	2	53.332	463	2.2	5.4	947380	604650
A0A0B4LHF9;R4HZM7;Q9I7I7;Q8SYZ4	NAD-dependent protein deacetylase Sirt2	Sirt2;Sirt2-RA	tr|A0A0B4LHF9|A0A0B4LHF9_DROME NAD-dependent protein deacetylase OS=Drosophila melanogaster OX=7227 GN=Sirt2 PE=1 SV=1;tr|R4HZM7|R4HZM7_DROME NAD-dependent protein deacetylase OS=Drosophila melanogaster OX=7227 GN=Sirt2-RA PE=2 SV=1;sp|Q9I7I7|SIRT2_DROME N	4	2	2	40.112	355	3.1	7.6	1218800	591630
A8E6K0;Q7KVQ0	Probable H/ACA ribonucleoprotein complex subunit 1	CG4038	tr|A8E6K0|A8E6K0_DROME H/ACA ribonucleoprotein complex subunit OS=Drosophila melanogaster OX=7227 GN=CG4038 PE=2 SV=1;sp|Q7KVQ0|GAR1_DROME Probable H/ACA ribonucleoprotein complex subunit 1 OS=Drosophila melanogaster OX=7227 GN=CG4038 PE=2 SV=1	2	6	6	22.665	237	11.8	28.7	2444400	5561400
Q7KSQ0		sea	tr|Q7KSQ0|Q7KSQ0_DROME LD46175p OS=Drosophila melanogaster OX=7227 GN=sea PE=1 SV=1	1	2	2	34.093	317	2.5	6	927960	1605900
Q86BI3;Q94540;F0JAG2;Q9VUY6		Zn72D	tr|Q86BI3|Q86BI3_DROME Zinc-finger protein at 72D, isoform B OS=Drosophila melanogaster OX=7227 GN=Zn72D PE=1 SV=1;tr|Q94540|Q94540_DROME Zinc-finger protein Zn72D OS=Drosophila melanogaster OX=7227 GN=Zn72D PE=2 SV=1;tr|F0JAG2|F0JAG2_DROME MIP27703p OS=Dr	4	2	2	96.028	884	1	2.4	726260	887850
Q9VUB8		endos	tr|Q9VUB8|Q9VUB8_DROME Endosulfine, isoform A OS=Drosophila melanogaster OX=7227 GN=endos PE=1 SV=1	1	3	3	12.949	119	13.4	31.9	3238600	4158900
Q9VE62;Q7KSD3		fray	tr|Q9VE62|Q9VE62_DROME Ste20-like protein kinase OS=Drosophila melanogaster OX=7227 GN=fray PE=2 SV=3;tr|Q7KSD3|Q7KSD3_DROME Frayed, isoform A OS=Drosophila melanogaster OX=7227 GN=fray PE=1 SV=1	2	2	2	60.29	552	1.6	3.8	1402300	675960
Q24241;Q0KIE7;Q95TU4		Ank	tr|Q24241|Q24241_DROME Ankyrin OS=Drosophila melanogaster OX=7227 GN=Ank PE=4 SV=1;tr|Q0KIE7|Q0KIE7_DROME Ankyrin, isoform B OS=Drosophila melanogaster OX=7227 GN=Ank PE=1 SV=1;tr|Q95TU4|Q95TU4_DROME LD21682p OS=Drosophila melanogaster OX=7227 GN=Ank PE=2	3	2	2	170.1	1549	0.8	1.9	627150	398050
C7LA78;Q9VMW9	GDP-mannose 4,6 dehydratase	Gmd-RA;Gmd	tr|C7LA78|C7LA78_DROME FI07655p OS=Drosophila melanogaster OX=7227 GN=Gmd-RA PE=2 SV=1;sp|Q9VMW9|GMDS_DROME GDP-mannose 4,6 dehydratase OS=Drosophila melanogaster OX=7227 GN=Gmd PE=1 SV=2	2	2	2	44.783	395	3	7.1	71632	584800
M9PCL4;Q9VMV6	SelT-like protein	CG3887	tr|M9PCL4|M9PCL4_DROME Uncharacterized protein, isoform B OS=Drosophila melanogaster OX=7227 GN=SelT PE=4 SV=1;sp|Q9VMV6|SELT_DROME Thioredoxin reductase-like selenoprotein T homolog CG3887 OS=Drosophila melanogaster OX=7227 GN=SelT PE=2 SV=1	2	2	2	22.323	198	4.5	10.6	8512600	4157100
Q95U34		Galk	tr|Q95U34|Q95U34_DROME GH11113p OS=Drosophila melanogaster OX=7227 GN=Galk PE=1 SV=1	1	2	2	54.126	490	2	4.7	0	559180
Q9VSH0			tr|Q9VSH0|Q9VSH0_DROME IP12463p OS=Drosophila melanogaster OX=7227 GN=BEST:CK01174 PE=2 SV=1	1	2	2	40.293	346	3.2	7.5	1109300	740150
O77266;Q960D4;Q7K7B5;A0A3Q7YT05;A0A3Q7YSE8		EG:22E5.5	tr|O77266|O77266_DROME Uncharacterized protein, isoform A OS=Drosophila melanogaster OX=7227 GN=EG:22E5.5 PE=1 SV=3;tr|Q960D4|Q960D4_DROME SD06560p OS=Drosophila melanogaster OX=7227 GN=EG:22E5.5 PE=1 SV=1;tr|Q7K7B5|Q7K7B5_DROME EG:22E5.5 protein OS=Drosop	5	4	4	60.778	552	4.7	10.9	546880	3130600
Q8I0M2;Q8MRT7		CG4210	tr|Q8I0M2|Q8I0M2_DROME SD13446p OS=Drosophila melanogaster OX=7227 GN=CG4210 PE=2 SV=1;tr|Q8MRT7|Q8MRT7_DROME SD26038p OS=Drosophila melanogaster OX=7227 GN=BcDNA:SD26038 PE=1 SV=1	2	3	3	16.482	142	8.5	19.7	800220	2727400
B7FNN6;P05389	60S acidic ribosomal protein P2	RpLP2-RB;RpLP2	tr|B7FNN6|B7FNN6_DROME LP06614p (Fragment) OS=Drosophila melanogaster OX=7227 GN=RpLP2-RB PE=2 SV=1;sp|P05389|RLA2_DROME 60S acidic ribosomal protein P2 OS=Drosophila melanogaster OX=7227 GN=RpLP2 PE=1 SV=1	2	3	3	13.924	131	7.6	17.6	7343800	7681000
Q8SX88;Q9VRV8;Q86PD5;O76331;Q8MSW8		Trn	tr|Q8SX88|Q8SX88_DROME LD12333p OS=Drosophila melanogaster OX=7227 GN=Tnpo PE=2 SV=1;tr|Q9VRV8|Q9VRV8_DROME FI21453p1 OS=Drosophila melanogaster OX=7227 GN=Tnpo PE=1 SV=1;tr|Q86PD5|Q86PD5_DROME RE59670p OS=Drosophila melanogaster OX=7227 GN=Tnpo PE=2 SV=1;	5	2	2	73.028	642	1.9	4.4	1212400	1126400
Q2XYI8;Q9VHT3;Q8SY87;C0MKD9;C0MKD5		Sgt1;CG9617	tr|Q2XYI8|Q2XYI8_DROME CG9617 (Fragment) OS=Drosophila melanogaster OX=7227 GN=Sgt1 PE=4 SV=1;tr|Q9VHT3|Q9VHT3_DROME CG9617 protein OS=Drosophila melanogaster OX=7227 GN=Sgt1 PE=1 SV=1;tr|Q8SY87|Q8SY87_DROME RH27607p OS=Drosophila melanogaster OX=7227 GN=S	5	3	3	18.456	165	9.7	22.4	1935800	1618700
Q9VHN6	39S ribosomal protein L19, mitochondrial	mRpL19	sp|Q9VHN6|RM19_DROME 39S ribosomal protein L19, mitochondrial OS=Drosophila melanogaster OX=7227 GN=mRpL19 PE=2 SV=1	1	4	4	36.192	306	6.5	15	1515100	1771300
Q9VC48	Methionine aminopeptidase 1		tr|Q9VC48|Q9VC48_DROME Methionine aminopeptidase OS=Drosophila melanogaster OX=7227 GN=MAP1A PE=1 SV=1	1	4	4	41.726	374	5.9	13.6	2468700	2582100
Q9VKC7;Q8MQY6		CG6766-RA;CG6766	tr|Q9VKC7|Q9VKC7_DROME FI04402p OS=Drosophila melanogaster OX=7227 GN=Dmel\CG6766 PE=1 SV=1;tr|Q8MQY6|Q8MQY6_DROME RE67845p OS=Drosophila melanogaster OX=7227 GN=CG6766 PE=2 SV=1	2	4	4	59.752	525	6.9	15.8	410870	1217200
M9PGL7;Q9U4L6	Mitochondrial import receptor subunit TOM40 homolog 1	Tom40	tr|M9PGL7|M9PGL7_DROME Translocase of outer membrane 40, isoform C OS=Drosophila melanogaster OX=7227 GN=Tom40 PE=4 SV=1;sp|Q9U4L6|TO401_DROME Mitochondrial import receptor subunit TOM40 homolog 1 OS=Drosophila melanogaster OX=7227 GN=Tom40 PE=2 SV=2	2	4	4	36.336	344	7	16	3076700	3098500
Q8IN56;C9QP47;Q9I7I8;C6TPA8;A0A0B4JDD8;A0A0B4JDG2;B7Z0M9;Q7KSB3;A0A0B4JCZ0;Q8IN55;Q86NP7	Oxysterol-binding protein	CG5077-RF;CG5077-RA;CG5077	tr|Q8IN56|Q8IN56_DROME Oxysterol-binding protein OS=Drosophila melanogaster OX=7227 GN=CG15684 PE=1 SV=4;tr|C9QP47|C9QP47_DROME Oxysterol-binding protein OS=Drosophila melanogaster OX=7227 GN=CG5077-RF PE=2 SV=1;tr|Q9I7I8|Q9I7I8_DROME Oxysterol-binding pro	11	7	7	89.535	798	4.9	11.2	5612900	5092600
Q9W1L1		mRpL43	tr|Q9W1L1|Q9W1L1_DROME Mitochondrial ribosomal protein L43 OS=Drosophila melanogaster OX=7227 GN=mRpL43 PE=1 SV=1	1	2	2	21.978	192	6.2	14.1	0	471060
Q7K571;Q9VWV2;Q7KUW2;Q9VWV4;Q9VWV5;D0IQG9		CG6247;CG32549-RF;CG32549-RE;CG32549-RA	tr|Q7K571|Q7K571_DROME GH10029p OS=Drosophila melanogaster OX=7227 GN=CG6247 PE=2 SV=1;tr|Q9VWV2|Q9VWV2_DROME Uncharacterized protein, isoform D OS=Drosophila melanogaster OX=7227 GN=CG6267 PE=1 SV=2;tr|Q7KUW2|Q7KUW2_DROME RH50433p OS=Drosophila melanogast	6	2	2	57.687	508	3.3	7.5	332920	546480
Q9VHJ7			tr|Q9VHJ7|Q9VHJ7_DROME LD41978p OS=Drosophila melanogaster OX=7227 GN=Dmel\CG11964 PE=1 SV=1	1	2	2	66.083	581	2.2	5	153650	622660
X2JEW2;C9QPD2;C5WLN0;Q9VYA7	RRP12-like protein	CG2691-RA;CG2691	tr|X2JEW2|X2JEW2_DROME Uncharacterized protein, isoform B OS=Drosophila melanogaster OX=7227 GN=RRP12 PE=1 SV=1;tr|C9QPD2|C9QPD2_DROME LD23114p (Fragment) OS=Drosophila melanogaster OX=7227 GN=CG2691-RA PE=2 SV=1;tr|C5WLN0|C5WLN0_DROME RE72321p (Fragment)	4	2	2	153.56	1384	1.2	2.7	428980	859420
Q9VEK8;Q9U3W5		sds22	tr|Q9VEK8|Q9VEK8_DROME GH07711p OS=Drosophila melanogaster OX=7227 GN=sds22 PE=1 SV=1;tr|Q9U3W5|Q9U3W5_DROME Putative mitotic protein phosphatase 1 regulator OS=Drosophila melanogaster OX=7227 GN=sds22 PE=2 SV=1	2	4	4	37.79	326	10.1	22.7	297660	1609700
Q9VMB9;Q86NN8		COX5B	tr|Q9VMB9|Q9VMB9_DROME Cytochrome c oxidase subunit 5B, isoform A OS=Drosophila melanogaster OX=7227 GN=COX5B PE=1 SV=1;tr|Q86NN8|Q86NN8_DROME RH49324p (Fragment) OS=Drosophila melanogaster OX=7227 GN=COX5B PE=2 SV=1	2	4	4	13.579	120	17.5	39.2	7062900	9569800
Q24050		anon-i1	tr|Q24050|Q24050_DROME Anon-i1 protein OS=Drosophila melanogaster OX=7227 GN=Dmel\CG2034 PE=1 SV=1	1	3	3	28.883	262	6.5	14.5	4382300	4654200
Q7KTZ2;O18683		Pi3K21B	tr|Q7KTZ2|Q7KTZ2_DROME Pi3K21B, isoform B OS=Drosophila melanogaster OX=7227 GN=Pi3K21B PE=1 SV=1;tr|O18683|O18683_DROME LD42724p OS=Drosophila melanogaster OX=7227 GN=Pi3K21B PE=2 SV=3	2	2	2	56.285	496	2.6	5.8	0	1043700
Q8IPP8;Q8IGG7		CG2907	tr|Q8IPP8|Q8IPP8_DROME Uncharacterized protein OS=Drosophila melanogaster OX=7227 GN=CG2907 PE=1 SV=1;tr|Q8IGG7|Q8IGG7_DROME RH24570p (Fragment) OS=Drosophila melanogaster OX=7227 GN=CG2907 PE=2 SV=1	2	2	1	27.157	256	5.1	11.3	0	495050
Q7KNA0	Dymeclin	CG8230	sp|Q7KNA0|DYM_DROME Dymeclin OS=Drosophila melanogaster OX=7227 GN=CG8230 PE=1 SV=1	1	2	2	79.124	699	1.4	3.1	624370	1098200
Q9VJZ4		ND-B22	tr|Q9VJZ4|Q9VJZ4_DROME AT12494p OS=Drosophila melanogaster OX=7227 GN=ND-B22 PE=1 SV=1	1	2	2	17.385	144	7.6	16.7	2090900	1395300
Q9VCW6		Gclm	tr|Q9VCW6|Q9VCW6_DROME GH03051p OS=Drosophila melanogaster OX=7227 GN=Gclm PE=1 SV=1	1	4	4	31.472	285	6.7	14.7	1359200	1688100
Q9VD55		Cchl	tr|Q9VD55|Q9VD55_DROME Cytochrome c heme lyase OS=Drosophila melanogaster OX=7227 GN=Cchl PE=1 SV=1	1	2	2	32.023	281	5.7	12.5	619150	0
Q9W1I8	Synaptosomal-associated protein	Snap29	tr|Q9W1I8|Q9W1I8_DROME LD03592p OS=Drosophila melanogaster OX=7227 GN=Snap29 PE=1 SV=1	1	3	3	31.595	284	9.2	20.1	4565600	4495800
E2QC56;Q7K4Q5	Probable protein phosphatase CG10417	CG10417	tr|E2QC56|E2QC56_DROME Uncharacterized protein, isoform B OS=Drosophila melanogaster OX=7227 GN=Dmel\CG10417 PE=1 SV=1;sp|Q7K4Q5|Y0417_DROME Probable protein phosphatase CG10417 OS=Drosophila melanogaster OX=7227 GN=CG10417 PE=1 SV=1	2	7	7	72.369	662	7.3	15.9	4318200	3615100
O02193;I1V4X5	Males-absent on the first protein;Histone acetyltransferase	mof	sp|O02193|MOF_DROME Males-absent on the first protein OS=Drosophila melanogaster OX=7227 GN=mof PE=1 SV=1;tr|I1V4X5|I1V4X5_DROME Histone acetyltransferase OS=Drosophila melanogaster OX=7227 GN=mof PE=3 SV=1	2	2	2	92.656	827	1.7	3.7	999690	1155200
Q59DP8;Q59DQ0;E6EK17;E6EK15;Q9V4C7;E6EK18;Q59DP9	Calcium-transporting ATPase	PMCA	tr|Q59DP8|Q59DP8_DROME Calcium-transporting ATPase OS=Drosophila melanogaster OX=7227 GN=PMCA PE=1 SV=3;tr|Q59DQ0|Q59DQ0_DROME Calcium-transporting ATPase OS=Drosophila melanogaster OX=7227 GN=PMCA PE=1 SV=3;tr|E6EK17|E6EK17_DROME Calcium-transporting ATPa	7	2	2	123.42	1120	1.3	2.8	175970	829910
Q9W4X9;Q8T9C2;H0RNN7	Centromere/kinetochore protein zw10	mit(1)15;Zw10;mit(1)15-RC	sp|Q9W4X9|ZW10_DROME Centromere/kinetochore protein zw10 OS=Drosophila melanogaster OX=7227 GN=Zw10 PE=1 SV=2;tr|Q8T9C2|Q8T9C2_DROME SD07771p OS=Drosophila melanogaster OX=7227 GN=Zw10 PE=2 SV=1;tr|H0RNN7|H0RNN7_DROME FI17506p1 (Fragment) OS=Drosophila mel	3	4	4	82.262	721	4.3	9.2	726140	1989400
Q9VHS8	Eukaryotic initiation factor 4A-III	eIF4AIII	sp|Q9VHS8|IF4A3_DROME Eukaryotic initiation factor 4A-III OS=Drosophila melanogaster OX=7227 GN=CG7483 PE=1 SV=1	1	5	3	45.644	399	6	12.8	0	825050
Q9W0Y1;Q2PE12	Troponin C-akin-1 protein	Tina-1	sp|Q9W0Y1|TINA1_DROME Troponin C-akin-1 protein OS=Drosophila melanogaster OX=7227 GN=Tina-1 PE=2 SV=1;tr|Q2PE12|Q2PE12_DROME GEO10659p1 OS=Drosophila melanogaster OX=7227 GN=Tina-1 PE=1 SV=1	2	2	2	19.055	167	4.8	10.2	862120	1004600
C0MJ66;P23572	Cyclin-dependent kinase 1	CG5363;cdc2	tr|C0MJ66|C0MJ66_DROME CG5363-PA OS=Drosophila melanogaster OX=7227 GN=CG5363 PE=3 SV=1;sp|P23572|CDK1_DROME Cyclin-dependent kinase 1 OS=Drosophila melanogaster OX=7227 GN=Cdk1 PE=1 SV=1	2	2	2	34.439	297	5.1	10.8	1776500	1763600
E2QD75;Q7K4N3	Nuclear cap-binding protein subunit 1	Cbp80	tr|E2QD75|E2QD75_DROME Cap binding protein 80, isoform B OS=Drosophila melanogaster OX=7227 GN=Cbp80 PE=1 SV=1;sp|Q7K4N3|NCBP1_DROME Nuclear cap-binding protein subunit 1 OS=Drosophila melanogaster OX=7227 GN=Cbp80 PE=1 SV=1	2	5	5	93.226	800	3.4	7.2	1181700	2026500
Q01637	Uridine 5-monophosphate synthase;Orotate phosphoribosyltransferase;Orotidine 5-phosphate decarboxylase	r-l	sp|Q01637|UMPS_DROME Uridine 5-monophosphate synthase OS=Drosophila melanogaster OX=7227 GN=r-l PE=2 SV=2	1	9	9	53.419	493	14	29.6	7167100	10953000
Q0E8X7			tr|Q0E8X7|Q0E8X7_DROME Reduction of Rh1, isoform A OS=Drosophila melanogaster OX=7227 GN=roh PE=1 SV=1	1	3	3	9.5409	82	9.8	20.7	1609000	1736900
Q9NK57	NIF3-like protein 1	anon-35F/36A	sp|Q9NK57|NIF3L_DROME NIF3-like protein 1 OS=Drosophila melanogaster OX=7227 GN=anon-35F/36A PE=1 SV=3	1	6	6	32.363	292	17.8	37.3	3203900	4728500
Q95S25;Q7KND8		Mad1	tr|Q95S25|Q95S25_DROME GM14169p OS=Drosophila melanogaster OX=7227 GN=Mad1 PE=2 SV=1;tr|Q7KND8|Q7KND8_DROME FI09619p OS=Drosophila melanogaster OX=7227 GN=Mad1 PE=1 SV=1	2	2	2	85.003	730	2.1	4.4	374410	946150
X2JAF1;Q8MSS1	Protein lava lamp	lva	tr|X2JAF1|X2JAF1_DROME Lava lamp, isoform D OS=Drosophila melanogaster OX=7227 GN=lva PE=4 SV=1;sp|Q8MSS1|LVA_DROME Protein lava lamp OS=Drosophila melanogaster OX=7227 GN=lva PE=1 SV=2	2	9	9	315.9	2779	2.2	4.6	2048500	2702600
Q9W351		CG16892-RA	tr|Q9W351|Q9W351_DROME LD42637p OS=Drosophila melanogaster OX=7227 GN=Aladin PE=1 SV=1	1	2	2	52.278	466	3	6.2	579260	1227900
Q9VIV2;M9PDF2		swm	sp|Q9VIV2|SWM_DROME Zinc finger protein swm OS=Drosophila melanogaster OX=7227 GN=swm PE=1 SV=1;tr|M9PDF2|M9PDF2_DROME Second mitotic wave missing, isoform C OS=Drosophila melanogaster OX=7227 GN=swm PE=1 SV=1	2	4	4	115.72	1062	3.6	7.4	2248800	1692100
Q9GQ87;Q9W541;O46090		eIF2B-epsilon;EG:86E4.1	tr|Q9GQ87|Q9GQ87_DROME Eukaryotic initiation factor eIF2B epsilon subunit OS=Drosophila melanogaster OX=7227 GN=eIF2Bepsilon PE=2 SV=1;tr|Q9W541|Q9W541_DROME Eukaryotic translation initiation factor 2B subunit epsilon, isoform A OS=Drosophila melanogaster	3	2	2	74.836	668	1.8	3.7	691810	1024600
Q9W3T9			tr|Q9W3T9|Q9W3T9_DROME GM01152p OS=Drosophila melanogaster OX=7227 GN=Dmel\CG3040 PE=1 SV=2	1	2	2	26.932	238	5.5	11.3	424900	562910
A0A0B4K7K6;Q9VBG6	Protein HGH1 homolog	CG6073	tr|A0A0B4K7K6|A0A0B4K7K6_DROME Uncharacterized protein, isoform B OS=Drosophila melanogaster OX=7227 GN=Dmel\CG6073 PE=4 SV=1;sp|Q9VBG6|HGH1_DROME Protein HGH1 homolog OS=Drosophila melanogaster OX=7227 GN=CG6073 PE=2 SV=2	2	2	2	41.799	369	5.7	11.7	240020	1089100
Q9VIQ8		COX4	tr|Q9VIQ8|Q9VIQ8_DROME Cytochrome c oxidase subunit 4, isoform A OS=Drosophila melanogaster OX=7227 GN=COX4 PE=1 SV=1	1	4	4	20.519	182	11.5	23.6	15689000	15044000
Q9VI58;Q86BP3;A0A0B4KGN4			sp|Q9VI58|TUTT_DROME Terminal uridylyltransferase Tailor OS=Drosophila melanogaster OX=7227 GN=Tailor PE=1 SV=1;tr|Q86BP3|Q86BP3_DROME Tailor, isoform A OS=Drosophila melanogaster OX=7227 GN=Tailor PE=1 SV=1;tr|A0A0B4KGN4|A0A0B4KGN4_DROME Tailor, isoform C	3	8	8	63.944	560	9.1	18.6	4760300	7222700
I0B1P6;D3DMI1;Q9W0G1;Q8IRH4;B8A420	Protein-tyrosine-phosphatase;Tyrosine-protein phosphatase non-receptor type 61F	Ptp61F-RA;Ptp61F	tr|I0B1P6|I0B1P6_DROME FI19882p1 OS=Drosophila melanogaster OX=7227 GN=Ptp61F-RA PE=2 SV=1;tr|D3DMI1|D3DMI1_DROME LP02164p OS=Drosophila melanogaster OX=7227 GN=Ptp61F-RA PE=2 SV=1;sp|Q9W0G1|PTP61_DROME Tyrosine-protein phosphatase non-receptor type 61F OS	5	2	2	62.104	548	2.7	5.5	1044800	969170
Q8T0F9;Q7KK96;Q4QQB8	Structural maintenance of chromosomes protein	SMC2	tr|Q8T0F9|Q8T0F9_DROME LD05471p (Fragment) OS=Drosophila melanogaster OX=7227 GN=SMC2 PE=2 SV=2;tr|Q7KK96|Q7KK96_DROME Structural maintenance of chromosomes protein OS=Drosophila melanogaster OX=7227 GN=SMC2 PE=1 SV=1;tr|Q4QQB8|Q4QQB8_DROME LD32453p (Fragm	3	5	5	112.75	985	2.8	5.7	2762600	2138800
X2JDP6;M9MRG2;Q8T079	Putative oxidoreductase GLYR1 homolog	CG4747	tr|X2JDP6|X2JDP6_DROME Uncharacterized protein, isoform C OS=Drosophila melanogaster OX=7227 GN=Ndf PE=4 SV=1;tr|M9MRG2|M9MRG2_DROME Uncharacterized protein, isoform B OS=Drosophila melanogaster OX=7227 GN=Ndf PE=4 SV=1;sp|Q8T079|GLYR1_DROME Putative oxido	3	5	5	65.251	602	7.6	15.4	3332700	3241500
Q95SH2		Chmp1	tr|Q95SH2|Q95SH2_DROME Charged multivesicular body protein 1, isoform A OS=Drosophila melanogaster OX=7227 GN=Chmp1 PE=1 SV=1	1	2	2	22.328	203	3.9	7.9	0	2806200
Q9VRD4;Q7K0S8		CG1532	tr|Q9VRD4|Q9VRD4_DROME Uncharacterized protein, isoform A OS=Drosophila melanogaster OX=7227 GN=Dmel\CG1532 PE=1 SV=1;tr|Q7K0S8|Q7K0S8_DROME LD36566p (Fragment) OS=Drosophila melanogaster OX=7227 GN=CG1532 PE=2 SV=1	2	6	6	31.642	288	16	32.3	4370700	4371400
Q7K569	Glycerol-3-phosphate dehydrogenase	Gpo-1	tr|Q7K569|Q7K569_DROME Glycerol-3-phosphate dehydrogenase OS=Drosophila melanogaster OX=7227 GN=Gpo1 PE=1 SV=1	1	11	11	80.421	724	12.8	25.8	3911300	12003000
M9NCR7;M9ND31;M9NE92;Q9VMP9	Glucosamine-6-phosphate isomerase	Oscillin;Gnpda1	tr|M9NCR7|M9NCR7_DROME Glucosamine-6-phosphate isomerase OS=Drosophila melanogaster OX=7227 GN=Oscillin PE=3 SV=1;tr|M9ND31|M9ND31_DROME Glucosamine-6-phosphate isomerase OS=Drosophila melanogaster OX=7227 GN=Oscillin PE=3 SV=1;tr|M9NE92|M9NE92_DROME Gluco	4	3	3	29.995	266	9	18	1573700	2108400
Q2XYF2;Q7JW03		UbcE2H	tr|Q2XYF2|Q2XYF2_DROME CG2257 (Fragment) OS=Drosophila melanogaster OX=7227 GN=UbcE2H PE=3 SV=1;tr|Q7JW03|Q7JW03_DROME CG2257 OS=Drosophila melanogaster OX=7227 GN=UbcE2H PE=1 SV=1	2	2	2	19.555	170	8.8	17.6	1875200	1391300
Q9VV76;Q6NP24		Syx8	tr|Q9VV76|Q9VV76_DROME Syntaxin 8 OS=Drosophila melanogaster OX=7227 GN=Syx8 PE=1 SV=1;tr|Q6NP24|Q6NP24_DROME LP02760p (Fragment) OS=Drosophila melanogaster OX=7227 GN=Syx8 PE=2 SV=1	2	2	2	26.484	232	8.6	17.2	702130	681210
Q9W0S6		mRpL17	tr|Q9W0S6|Q9W0S6_DROME IP18235p OS=Drosophila melanogaster OX=7227 GN=mRpL17 PE=1 SV=2	1	2	2	20.865	176	6.8	13.6	1262000	703930
Q9VHA1;Q86P04;Q9VHA2		SpdS	tr|Q9VHA1|Q9VHA1_DROME Spermidine synthase, isoform A OS=Drosophila melanogaster OX=7227 GN=SpdS PE=1 SV=1;tr|Q86P04|Q86P04_DROME RE01362p (Fragment) OS=Drosophila melanogaster OX=7227 GN=SpdS PE=2 SV=1;tr|Q9VHA2|Q9VHA2_DROME GH08387p OS=Drosophila melanog	3	2	2	32.335	287	4.9	9.8	857860	399530
M9PET0;M9PC43;B5RIM9;P13706	Glycerol-3-phosphate dehydrogenase [NAD(+)];Glycerol-3-phosphate dehydrogenase [NAD(+)], cytoplasmic	Gpdh	tr|M9PET0|M9PET0_DROME Glycerol-3-phosphate dehydrogenase [NAD(+)] OS=Drosophila melanogaster OX=7227 GN=Gpdh1 PE=1 SV=1;tr|M9PC43|M9PC43_DROME Glycerol-3-phosphate dehydrogenase [NAD(+)] OS=Drosophila melanogaster OX=7227 GN=Gpdh1 PE=1 SV=1;tr|B5RIM9|B5RI	4	2	2	38.258	350	4.3	8.6	891110	776470
X2JHT0;Q8IRY7;A0A3Q7YTV0;A0A3Q7YHZ8;A0A3Q7YHY9;A0A3Q7YHY2;A0A3Q7YHY1;A0A3Q7YHQ3;A0A3Q7YHP9;A0A3Q7YHP3	Caspase-8;Caspase-8 subunit p15;Caspase-8 subunit p10	Dredd	tr|X2JHT0|X2JHT0_DROME Death related ced-3/Nedd2-like caspase, isoform G OS=Drosophila melanogaster OX=7227 GN=Dredd PE=3 SV=1;sp|Q8IRY7|CASP8_DROME Caspase-8 OS=Drosophila melanogaster OX=7227 GN=Dredd PE=1 SV=3;tr|A0A3Q7YTV0|A0A3Q7YTV0_DROME CG7486 (Frag	10	2	2	50.041	440	4.3	8.6	174140	595130
I1WYH6;Q9VCX4;A0A0B4LIH0	Ribosome-releasing factor 2, mitochondrial	CG31159-RA;EF-G2	tr|I1WYH6|I1WYH6_DROME RH61333p1 (Fragment) OS=Drosophila melanogaster OX=7227 GN=CG31159-RA PE=2 SV=1;sp|Q9VCX4|RRF2M_DROME Ribosome-releasing factor 2, mitochondrial OS=Drosophila melanogaster OX=7227 GN=EF-G2 PE=2 SV=3;tr|A0A0B4LIH0|A0A0B4LIH0_DROME Mit	3	2	2	77.429	703	2.3	4.6	0	706390
Q9W3G0			tr|Q9W3G0|Q9W3G0_DROME Phosphatidylinositol glycan anchor biosynthesis class T OS=Drosophila melanogaster OX=7227 GN=PIG-T PE=2 SV=1	1	2	2	71.24	633	1.9	3.8	596640	893050
M9PF16;Q00963;M9PHG4;X4YME1	Spectrin beta chain	beta-Spec	tr|M9PF16|M9PF16_DROME Spectrin beta chain OS=Drosophila melanogaster OX=7227 GN=beta-Spec PE=3 SV=1;sp|Q00963|SPTCB_DROME Spectrin beta chain OS=Drosophila melanogaster OX=7227 GN=beta-Spec PE=1 SV=2;tr|M9PHG4|M9PHG4_DROME Spectrin beta chain OS=Drosophil	4	6	6	267.62	2308	1.8	3.6	2046300	3208300
X2J9F3;Q9VKJ3	Nuclear pore complex protein Nup160 homolog	Nup160	tr|X2J9F3|X2J9F3_DROME Nucleoporin 160kD, isoform B OS=Drosophila melanogaster OX=7227 GN=Nup160 PE=4 SV=1;sp|Q9VKJ3|NU160_DROME Nuclear pore complex protein Nup160 homolog OS=Drosophila melanogaster OX=7227 GN=Nup160 PE=1 SV=1	2	2	2	160.27	1411	1.7	3.4	236720	596240
Q9V9W7;O96695		rod	tr|Q9V9W7|Q9V9W7_DROME Rough deal OS=Drosophila melanogaster OX=7227 GN=rod PE=1 SV=2;tr|O96695|O96695_DROME Rough deal protein OS=Drosophila melanogaster OX=7227 GN=rod PE=4 SV=1	2	2	2	239.69	2089	0.7	1.4	54643	321920
Q9VI57;Q8SWY7	Dephospho-CoA kinase 1	Dpck	tr|Q9VI57|Q9VI57_DROME Dephospho-CoA kinase OS=Drosophila melanogaster OX=7227 GN=Dpck PE=2 SV=1;tr|Q8SWY7|Q8SWY7_DROME RH63365p OS=Drosophila melanogaster OX=7227 GN=Dpck PE=2 SV=1	2	4	4	27.109	236	8.5	16.9	6138300	2990800
C0MIY3;A0APG2;A0A0B4K6L4;Q27601	Amidophosphoribosyltransferase	CG2867;Prat	tr|C0MIY3|C0MIY3_DROME Amidophosphoribosyltransferase OS=Drosophila melanogaster OX=7227 GN=CG2867 PE=3 SV=1;tr|A0APG2|A0APG2_DROME Amidophosphoribosyltransferase OS=Drosophila melanogaster OX=7227 GN=CG2867 PE=3 SV=1;tr|A0A0B4K6L4|A0A0B4K6L4_DROME Amidoph	4	4	4	59.495	546	6.4	12.6	3662500	2978200
Q9VZS1;Q9W0Q0			tr|Q9VZS1|Q9VZS1_DROME LD28127p OS=Drosophila melanogaster OX=7227 GN=Dmel\CG17746 PE=1 SV=1	2	4	4	41.009	371	5.1	10	2210300	1405600
Q9VEN3;Q8IGS1		GckIII	tr|Q9VEN3|Q9VEN3_DROME FI20177p1 OS=Drosophila melanogaster OX=7227 GN=GckIII PE=1 SV=1;tr|Q8IGS1|Q8IGS1_DROME RE38276p OS=Drosophila melanogaster OX=7227 GN=GckIII PE=2 SV=1	2	2	2	69.933	642	2.3	4.5	175170	1073300
Q9W2M4;Q8MR08		CG10527	tr|Q9W2M4|Q9W2M4_DROME Uncharacterized protein OS=Drosophila melanogaster OX=7227 GN=FAMeT PE=1 SV=1;tr|Q8MR08|Q8MR08_DROME LD46156p (Fragment) OS=Drosophila melanogaster OX=7227 GN=CG10527 PE=2 SV=1	2	6	6	31.556	296	13.9	27	2112200	11448000
Q95RL2;Q5U156;A0A0B4KER0		row	tr|Q95RL2|Q95RL2_DROME LD21608p OS=Drosophila melanogaster OX=7227 GN=row PE=1 SV=1;tr|Q5U156|Q5U156_DROME RE01954p OS=Drosophila melanogaster OX=7227 GN=row PE=1 SV=1;tr|A0A0B4KER0|A0A0B4KER0_DROME Relative of woc, isoform C OS=Drosophila melanogaster OX=	3	2	2	67.032	602	1.7	3.3	1100400	897740
Q86NN5;Q9VPE2;A0A024E3A5;Q059D4		ND-39;CG6020-RA	tr|Q86NN5|Q86NN5_DROME GM13757p OS=Drosophila melanogaster OX=7227 GN=ND-39 PE=2 SV=1;tr|Q9VPE2|Q9VPE2_DROME NADH dehydrogenase (Ubiquinone) 39 kDa subunit, isoform A OS=Drosophila melanogaster OX=7227 GN=ND-39 PE=1 SV=1;tr|A0A024E3A5|A0A024E3A5_DROME FI24	4	5	5	37.789	327	13.1	25.4	1055000	3081200
E2QC83;Q7KNF2	Polyadenylate-binding protein 2	Pabp2	tr|E2QC83|E2QC83_DROME Pabp2, isoform B OS=Drosophila melanogaster OX=7227 GN=Pabp2 PE=1 SV=1;sp|Q7KNF2|PABP2_DROME Polyadenylate-binding protein 2 OS=Drosophila melanogaster OX=7227 GN=Pabp2 PE=1 SV=1	2	3	3	24.978	224	13.4	25.9	1889400	1193600
Q9VH76	Synaptosomal-associated protein	Snap24	tr|Q9VH76|Q9VH76_DROME Synaptosomal-associated protein OS=Drosophila melanogaster OX=7227 GN=Snap24 PE=1 SV=1	1	3	3	23.554	212	10.8	20.8	2799400	2059200
Q9VKK1	Enhancer of mRNA-decapping protein 4 homolog	Ge-1	sp|Q9VKK1|EDC4_DROME Enhancer of mRNA-decapping protein 4 homolog OS=Drosophila melanogaster OX=7227 GN=Ge-1 PE=1 SV=2	1	5	5	149.25	1354	2.7	5.2	1008000	2932800
Q94885		ORF	tr|Q94885|Q94885_DROME Orf protein OS=Drosophila melanogaster OX=7227 GN=orf PE=4 SV=1	1	3	3	172.48	1494	1.3	2.5	36293000	22893000
Q9VAK1;Q8IMK7;Q961C5;A0A0B4K7Q3;D6W4T6		alph;alph-RE	tr|Q9VAK1|Q9VAK1_DROME Alphabet, isoform A OS=Drosophila melanogaster OX=7227 GN=alph PE=1 SV=1;tr|Q8IMK7|Q8IMK7_DROME Alphabet, isoform B OS=Drosophila melanogaster OX=7227 GN=alph PE=1 SV=1;tr|Q961C5|Q961C5_DROME Alphabet, isoform E OS=Drosophila melanog	5	4	4	40.955	368	10.3	19.8	984040	5686400
P12646;B7FNK0;X2JEF0	Glucose-6-phosphate 1-dehydrogenase	Zw;Zw-RA	sp|P12646|G6PD_DROME Glucose-6-phosphate 1-dehydrogenase OS=Drosophila melanogaster OX=7227 GN=Zw PE=1 SV=2;tr|B7FNK0|B7FNK0_DROME Glucose-6-phosphate 1-dehydrogenase OS=Drosophila melanogaster OX=7227 GN=Zw-RA PE=2 SV=1;tr|X2JEF0|X2JEF0_DROME Glucose-6-ph	3	5	5	60.43	524	7.6	14.5	2289700	2978000
Q9VWI2		Nat1	tr|Q9VWI2|Q9VWI2_DROME N(Alpha)-acetyltransferase 15/16, isoform A OS=Drosophila melanogaster OX=7227 GN=Naa15-16 PE=1 SV=1	1	16	16	103.09	890	12.7	24.2	10783000	19064000
Q9VHT5		mRpL1	tr|Q9VHT5|Q9VHT5_DROME LD31571p OS=Drosophila melanogaster OX=7227 GN=mRpL1 PE=1 SV=2	1	2	2	40.298	354	4	7.6	819070	828980
Q9W3N9			tr|Q9W3N9|Q9W3N9_DROME LD24105p OS=Drosophila melanogaster OX=7227 GN=Dmel\CG10932 PE=1 SV=1	1	2	2	43.47	410	5.9	11.2	711710	1140500
G4LTX1;Q8IQ56	Transmembrane protein 11 homolog, mitochondrial	PGRP-LD-RB;Pmi	tr|G4LTX1|G4LTX1_DROME GH14535p2 OS=Drosophila melanogaster OX=7227 GN=Pmi PE=1 SV=1;sp|Q8IQ56|TMM11_DROME Transmembrane protein 11 homolog, mitochondrial OS=Drosophila melanogaster OX=7227 GN=Pmi PE=1 SV=3	2	2	2	19.448	173	5.8	11	0	504170
Q8IQQ9;Q8T4G5			tr|Q8IQQ9|Q8IQQ9_DROME Uncharacterized protein, isoform B OS=Drosophila melanogaster OX=7227 GN=DmCG6512 PE=1 SV=1;tr|Q8T4G5|Q8T4G5_DROME SD01613p OS=Drosophila melanogaster OX=7227 GN=DmCG6512 PE=1 SV=1	2	10	10	76.066	697	9.2	17.4	3132800	3386900
M9PGD7;Q9W4R9			tr|M9PGD7|M9PGD7_DROME Uncharacterized protein, isoform B OS=Drosophila melanogaster OX=7227 GN=Dmel\CG10802 PE=1 SV=1;tr|Q9W4R9|Q9W4R9_DROME LD13611p OS=Drosophila melanogaster OX=7227 GN=Dmel\CG10802 PE=1 SV=2	2	2	2	46.43	412	3.6	6.8	1908800	1243300
Q9VQZ0;C0MKC7;A0APR8	Protein YIPF	CG3652	tr|Q9VQZ0|Q9VQZ0_DROME Protein YIPF OS=Drosophila melanogaster OX=7227 GN=Dmel\CG3652 PE=1 SV=2;tr|C0MKC7|C0MKC7_DROME Protein YIPF OS=Drosophila melanogaster OX=7227 GN=CG3652 PE=3 SV=1;tr|A0APR8|A0APR8_DROME Protein YIPF OS=Drosophila melanogaster OX=722	3	2	2	24.92	224	11.6	21.9	877250	817270
Q9V400;Q9NHC7		Ilk	tr|Q9V400|Q9V400_DROME Integrin linked kinase, isoform A OS=Drosophila melanogaster OX=7227 GN=Ilk PE=1 SV=1;tr|Q9NHC7|Q9NHC7_DROME Integrin-linked kinase OS=Drosophila melanogaster OX=7227 GN=Ilk PE=2 SV=1	2	2	2	50.742	448	2.5	4.7	0	702210
A0A0B4KGU0;A0A0B4KFR6;H1UUI3;Q9VGK7;Q5BID1	Putative elongator complex protein 1	Elp1;Elp1-RA	tr|A0A0B4KGU0|A0A0B4KGU0_DROME Elongator complex protein 1 OS=Drosophila melanogaster OX=7227 GN=Elp1 PE=1 SV=1;tr|A0A0B4KFR6|A0A0B4KFR6_DROME Elongator complex protein 1 OS=Drosophila melanogaster OX=7227 GN=Elp1 PE=1 SV=1;tr|H1UUI3|H1UUI3_DROME FI18107p1	5	2	2	142.88	1253	1.6	3	475580	1059800
M9NF33;Q9VSH4	Cleavage and polyadenylation specificity factor subunit CG7185	CG7185	tr|M9NF33|M9NF33_DROME Uncharacterized protein, isoform B OS=Drosophila melanogaster OX=7227 GN=Cpsf6 PE=4 SV=1;sp|Q9VSH4|CPSF6_DROME Cleavage and polyadenylation specificity factor subunit CG7185 OS=Drosophila melanogaster OX=7227 GN=CG7185 PE=1 SV=2	2	5	5	66.125	605	6.8	12.7	2910900	2916500
E1JJI5;P54367	Casein kinase I isoform alpha	CkIalpha	tr|E1JJI5|E1JJI5_DROME Casein kinase ialpha, isoform D OS=Drosophila melanogaster OX=7227 GN=CkIalpha PE=1 SV=1;sp|P54367|KC1A_DROME Casein kinase I isoform alpha OS=Drosophila melanogaster OX=7227 GN=CkIalpha PE=1 SV=1	2	2	2	39.535	337	3	5.6	779000	847410
Q9VI56			tr|Q9VI56|Q9VI56_DROME GEO05313p1 OS=Drosophila melanogaster OX=7227 GN=Dmel\CG1943 PE=1 SV=1	1	4	4	12.428	118	31.4	58.5	4972900	11435000
B7YZT2		Fis1	sp|B7YZT2|FIS1_DROME Mitochondrial fission 1 protein OS=Drosophila melanogaster OX=7227 GN=Fis1 PE=2 SV=1	1	3	3	17.771	154	14.3	26.6	1733200	2258800
Q8SX57		CG11005	tr|Q8SX57|Q8SX57_DROME LD44221p OS=Drosophila melanogaster OX=7227 GN=CG11005 PE=1 SV=1	1	3	3	26.933	257	11.3	21	3845700	4152200
Q7KRR5	Peptide-N(4)-(N-acetyl-beta-glucosaminyl)asparagine amidase	Pngl	sp|Q7KRR5|NGLY1_DROME Peptide-N(4)-(N-acetyl-beta-glucosaminyl)asparagine amidase OS=Drosophila melanogaster OX=7227 GN=Pngl PE=1 SV=1	1	3	3	73.315	631	3.5	6.5	1499600	1369800
Q9VE11	UPF0488 protein CG14286	CG14286	sp|Q9VE11|U488_DROME UPF0488 protein CG14286 OS=Drosophila melanogaster OX=7227 GN=CG14286 PE=2 SV=1	1	2	2	22.024	200	3.5	6.5	185450	0
X2JEN8;Q9W5N0	Cytochrome c oxidase assembly factor 7 homolog	CG13865	tr|X2JEN8|X2JEN8_DROME Uncharacterized protein, isoform C OS=Drosophila melanogaster OX=7227 GN=Coa7 PE=4 SV=1;sp|Q9W5N0|COA7_DROME Cytochrome c oxidase assembly factor 7 homolog OS=Drosophila melanogaster OX=7227 GN=CG13865 PE=2 SV=1	2	2	2	29.639	266	7.5	13.9	2576800	981150
Q8MSQ7;Q7KT38;X2J946;Q9VJ30;Q9U485		Nak	tr|Q8MSQ7|Q8MSQ7_DROME SD07306p OS=Drosophila melanogaster OX=7227 GN=Nak PE=2 SV=1;tr|Q7KT38|Q7KT38_DROME Numb-associated kinase, isoform C OS=Drosophila melanogaster OX=7227 GN=Nak PE=1 SV=1;tr|X2J946|X2J946_DROME Numb-associated kinase, isoform E OS=Dro	5	2	2	74.792	698	2.7	5	144760	428210
Q5LJR0;M9NFF0;M9NDV5;Q8SYF7;Q6NL55;Q5LJR2		CG17715-RC	tr|Q5LJR0|Q5LJR0_DROME Uncharacterized protein, isoform A OS=Drosophila melanogaster OX=7227 GN=BcDNA:RE07178 PE=1 SV=1;tr|M9NFF0|M9NFF0_DROME Uncharacterized protein, isoform H OS=Drosophila melanogaster OX=7227 GN=Dmel\CG17715 PE=1 SV=1;tr|M9NDV5|M9NDV5_	6	2	2	15.583	135	14.8	27.4	193700	980080
M9PCU1;M9PI83;M9PFX0;M9PFI5;X2JGR4;A8JNU2;M9PFI8;M9PCT8;M9PFS1;P00522	Non-specific protein-tyrosine kinase;Tyrosine-protein kinase Abl	Abl	tr|M9PCU1|M9PCU1_DROME Abl tyrosine kinase, isoform H OS=Drosophila melanogaster OX=7227 GN=Abl PE=1 SV=1;tr|M9PI83|M9PI83_DROME Abl tyrosine kinase, isoform G OS=Drosophila melanogaster OX=7227 GN=Abl PE=1 SV=1;tr|M9PFX0|M9PFX0_DROME Abl tyrosine kinase,	10	4	4	159.58	1504	2	3.7	1419200	1547900
Q9VST4;Q6NLA0;T1W135;Q8T8X7		CG5144;CG5144-RA	tr|Q9VST4|Q9VST4_DROME Uncharacterized protein OS=Drosophila melanogaster OX=7227 GN=Dmel\CG5144 PE=3 SV=1;tr|Q6NLA0|Q6NLA0_DROME RH66859p (Fragment) OS=Drosophila melanogaster OX=7227 GN=CG5144 PE=2 SV=1;tr|T1W135|T1W135_DROME FI23941p1 (Fragment) OS=Dros	4	2	2	43.65	388	3.9	7.2	453940	1229700
Q9VXR5;A8E715;Q8T9H2			tr|Q9VXR5|Q9VXR5_DROME LD02975p OS=Drosophila melanogaster OX=7227 GN=Dmel\CG9281 PE=1 SV=1	3	7	7	69.501	611	7	12.9	5411600	4840900
Q9VHI7			tr|Q9VHI7|Q9VHI7_DROME LD47007p OS=Drosophila melanogaster OX=7227 GN=Dmel\CG11982 PE=1 SV=1	1	4	4	40.319	380	7.9	14.5	1311000	1002100
A0A0B4K7Z5;Q7KLV9	26S proteasome non-ATPase regulatory subunit 11	Rpn6	tr|A0A0B4K7Z5|A0A0B4K7Z5_DROME Regulatory particle non-ATPase 6, isoform C OS=Drosophila melanogaster OX=7227 GN=Rpn6 PE=1 SV=1;sp|Q7KLV9|PSD11_DROME 26S proteasome non-ATPase regulatory subunit 11 OS=Drosophila melanogaster OX=7227 GN=Rpn6 PE=1 SV=1	2	16	16	47.263	422	26.1	47.6	26799000	19827000
Q9VIK1			tr|Q9VIK1|Q9VIK1_DROME Transmembrane 9 superfamily member OS=Drosophila melanogaster OX=7227 GN=TM9SF2 PE=1 SV=1	1	4	4	74.64	659	7.1	12.9	3723600	4224600
Q9VID7;Q8T3M6		l(2)k14505	tr|Q9VID7|Q9VID7_DROME Lethal (2) k14505, isoform A OS=Drosophila melanogaster OX=7227 GN=l(2)k14505 PE=1 SV=1;tr|Q8T3M6|Q8T3M6_DROME GM08665p OS=Drosophila melanogaster OX=7227 GN=l(2)k14505 PE=2 SV=1	2	2	2	31.86	279	7.5	13.6	504640	1184700
Q9VMY9		DhpD	sp|Q9VMY9|GUAD_DROME Guanine deaminase OS=Drosophila melanogaster OX=7227 GN=DhpD PE=1 SV=1	1	4	4	48.884	448	6.2	11.2	3424500	2411500
G3JX25;C1C3E7;G3JX31;G3JX29;G3JX30;G3JX27;G3JX28;A0A0B4KFR8;G3JX32;A0A0B4KER6;A0A0B4KEW3;A0A0B4LGL0;A0A126GUN6;A1ZA47	PDZ and LIM domain protein Zasp	Zasp52	tr|G3JX25|G3JX25_DROME Z band alternatively spliced PDZ-motif protein 52, isoform P OS=Drosophila melanogaster OX=7227 GN=Zasp52 PE=1 SV=1;tr|C1C3E7|C1C3E7_DROME MIP09364p OS=Drosophila melanogaster OX=7227 GN=Zasp52 PE=1 SV=1;tr|G3JX31|G3JX31_DROME Z band	14	3	3	25.675	233	10.7	19.3	1335500	1784900
Q7K4Q9		Hmgs	tr|Q7K4Q9|Q7K4Q9_DROME 3-hydroxy-3-methylglutaryl coenzyme A synthase OS=Drosophila melanogaster OX=7227 GN=Hmgs PE=1 SV=1	1	2	2	51.176	465	3	5.4	495850	844800
A0A0H4Y1G5;A0A0B4LGZ6;P51592;N0D584;B5RJK6	E3 ubiquitin-protein ligase hyd	hyd;hyd-RA	tr|A0A0H4Y1G5|A0A0H4Y1G5_DROME FI24602p1 OS=Drosophila melanogaster OX=7227 GN=hyd-RA PE=2 SV=1;tr|A0A0B4LGZ6|A0A0B4LGZ6_DROME Hyperplastic discs, isoform B OS=Drosophila melanogaster OX=7227 GN=hyd PE=1 SV=1;sp|P51592|HYD_DROME E3 ubiquitin-protein ligase	5	3	3	318.88	2885	1	1.8	349500	903430
M9PE02;E1JJJ8;M9PGM8;M9PJC7;P13709	Homeotic protein female sterile	fs(1)h	tr|M9PE02|M9PE02_DROME Female sterile (1) homeotic, isoform H OS=Drosophila melanogaster OX=7227 GN=fs(1)h PE=1 SV=1;tr|E1JJJ8|E1JJJ8_DROME Female sterile (1) homeotic, isoform F OS=Drosophila melanogaster OX=7227 GN=fs(1)h PE=1 SV=1;tr|M9PGM8|M9PGM8_DROME	5	4	4	110.01	1105	3.4	6.1	1781600	1294700
Q5U117		Egm	tr|Q5U117|Q5U117_DROME Enigma OS=Drosophila melanogaster OX=7227 GN=Egm PE=1 SV=1	1	5	5	70.808	639	7	12.5	4438200	3467500
Q5BI50;Q961E0		Cul4	tr|Q5BI50|Q5BI50_DROME Cullin 4, isoform A OS=Drosophila melanogaster OX=7227 GN=Cul4 PE=1 SV=1;tr|Q961E0|Q961E0_DROME GM14815p OS=Drosophila melanogaster OX=7227 GN=Cul4 PE=2 SV=1	2	8	8	94.407	821	5.1	9.1	1402000	4498600
Q9V948;E1JGN7;Q7KA80;A1ZBW1;A1ZBW0;Q7KHL0;D3DMD1;A1ZBW3;Q8IGP8;A1ZBW4		bl;bl-RB	tr|Q9V948|Q9V948_DROME HnRNP K protein homolog OS=Drosophila melanogaster OX=7227 GN=HnRNP-K PE=2 SV=3;tr|E1JGN7|E1JGN7_DROME Heterogeneous nuclear ribonucleoprotein K, isoform E OS=Drosophila melanogaster OX=7227 GN=HnRNP-K PE=1 SV=1;tr|Q7KA80|Q7KA80_DROM	10	4	4	49.623	490	5.5	9.8	1096700	2440300
M9PFG7;M9PF24;P46824	Kinesin light chain	Klc	tr|M9PFG7|M9PFG7_DROME Kinesin light chain, isoform C OS=Drosophila melanogaster OX=7227 GN=Klc PE=4 SV=1;tr|M9PF24|M9PF24_DROME Kinesin light chain, isoform B OS=Drosophila melanogaster OX=7227 GN=Klc PE=4 SV=1;sp|P46824|KLC_DROME Kinesin light chain OS=D	3	7	7	57.916	507	9.1	16.2	2702800	1494900
X2J4N6;Q9VMQ7	Putative elongator complex protein 4	CG6907	tr|X2J4N6|X2J4N6_DROME Uncharacterized protein, isoform B OS=Drosophila melanogaster OX=7227 GN=Dmel\CG6907 PE=4 SV=1;sp|Q9VMQ7|ELP4_DROME Putative elongator complex protein 4 OS=Drosophila melanogaster OX=7227 GN=CG6907 PE=1 SV=1	2	4	4	48.712	437	7.8	13.7	1059900	2534300
Q7K0D8		Nup50	sp|Q7K0D8|NUP50_DROME Nuclear pore complex protein Nup50 OS=Drosophila melanogaster OX=7227 GN=Nup50 PE=2 SV=1	1	13	13	59.434	564	21.3	37.4	10868000	6147800
Q4V5H1	Peptidyl-prolyl cis-trans isomerase		tr|Q4V5H1|Q4V5H1_DROME Peptidyl-prolyl cis-trans isomerase OS=Drosophila melanogaster OX=7227 GN=Dmel\CG17266 PE=1 SV=1	1	2	2	20.182	183	6.6	11.5	108950	568210
C0MJE4;Q24572;E1JIL4	Probable histone-binding protein Caf1	CG4236;Caf1	tr|C0MJE4|C0MJE4_DROME CG4236-PA OS=Drosophila melanogaster OX=7227 GN=CG4236 PE=4 SV=1;sp|Q24572|CAF1_DROME Probable histone-binding protein Caf1 OS=Drosophila melanogaster OX=7227 GN=Caf1 PE=1 SV=1;tr|E1JIL4|E1JIL4_DROME Chromatin assembly factor 1, p55	3	13	13	48.634	430	26.7	46.5	35201000	36622000
Q9W461			tr|Q9W461|Q9W461_DROME LD23868p OS=Drosophila melanogaster OX=7227 GN=Dmel\CG16721 PE=1 SV=1	1	3	3	56.015	494	3.4	5.9	463670	0
M9PB90;Q9VKY2;Q7KMK9	Cullin-associated NEDD8-dissociated protein 1	Cand1	tr|M9PB90|M9PB90_DROME Cullin-associated and neddylation-dissociated 1, isoform B OS=Drosophila melanogaster OX=7227 GN=Cand1 PE=1 SV=1;sp|Q9VKY2|CAND1_DROME Cullin-associated NEDD8-dissociated protein 1 OS=Drosophila melanogaster OX=7227 GN=Cand1 PE=2 SV=	3	17	17	139.35	1248	10.9	18.9	8125500	10588000
O44433;Q7KNS5;A0A0B4KFT9		qkr54B	tr|O44433|O44433_DROME QKR54B OS=Drosophila melanogaster OX=7227 GN=qkr54B PE=2 SV=1;tr|Q7KNS5|Q7KNS5_DROME Quaking related 54B, isoform A OS=Drosophila melanogaster OX=7227 GN=qkr54B PE=1 SV=1;tr|A0A0B4KFT9|A0A0B4KFT9_DROME Quaking related 54B, isoform E	3	2	2	47.648	425	2.6	4.5	969530	643450
Q961S9;Q9VIH3		Mtp	tr|Q961S9|Q961S9_DROME SD01502p OS=Drosophila melanogaster OX=7227 GN=Mtp PE=2 SV=1;tr|Q9VIH3|Q9VIH3_DROME Microsomal triacylglycerol transfer protein OS=Drosophila melanogaster OX=7227 GN=Mtp PE=1 SV=2	2	4	4	98.89	886	5.5	9.5	725160	1979000
Q9W1R3;Q8T8Q5		Golgin245	tr|Q9W1R3|Q9W1R3_DROME Golgin-245 OS=Drosophila melanogaster OX=7227 GN=Golgin245 PE=1 SV=2;tr|Q8T8Q5|Q8T8Q5_DROME SD05887p OS=Drosophila melanogaster OX=7227 GN=Golgin245 PE=2 SV=1	2	2	2	170.13	1489	1.1	1.9	408800	568050
Q9VD26;Q8T9J8	Zinc finger protein-like 1 homolog	CG5382	sp|Q9VD26|ZFPL1_DROME Zinc finger protein-like 1 homolog OS=Drosophila melanogaster OX=7227 GN=CG5382 PE=1 SV=1;tr|Q8T9J8|Q8T9J8_DROME GM05688p OS=Drosophila melanogaster OX=7227 GN=CG5382 PE=2 SV=1	2	5	5	33.503	299	12.4	21.4	1808100	2701200
D0IQG7;Q9W092	Probable chitinase 2	Cht2	tr|D0IQG7|D0IQG7_DROME Chitinase 2, isoform B OS=Drosophila melanogaster OX=7227 GN=Cht2 PE=1 SV=1;sp|Q9W092|CHIT2_DROME Probable chitinase 2 OS=Drosophila melanogaster OX=7227 GN=Cht2 PE=1 SV=1	2	2	2	54.122	484	3.5	6	554490	2624600
Q9VLT7;C5WLN8;Q29QX9		RpL36A;RpL36A-RA	tr|Q9VLT7|Q9VLT7_DROME IP17351p OS=Drosophila melanogaster OX=7227 GN=RpL36A PE=1 SV=2;tr|C5WLN8|C5WLN8_DROME TA01007p (Fragment) OS=Drosophila melanogaster OX=7227 GN=RpL36A-RA PE=2 SV=1;tr|Q29QX9|Q29QX9_DROME IP15820p (Fragment) OS=Drosophila melanogaste	3	6	6	12.501	104	16.3	27.9	15031000	10441000
X2JB87;Q9Y1A3	Mitochondrial import inner membrane translocase subunit Tim8	Tim8	tr|X2JB87|X2JB87_DROME GEO09348p1 OS=Drosophila melanogaster OX=7227 GN=Tim8 PE=2 SV=1;sp|Q9Y1A3|TIM8_DROME Mitochondrial import inner membrane translocase subunit Tim8 OS=Drosophila melanogaster OX=7227 GN=Tim8 PE=3 SV=1	2	2	2	10.062	88	23.9	40.9	1067100	1681200
A0A0B4KHS9;P48461;Q95V52;Q95V51;Q5K375;Q5LJN2;A8QI94;Q9VQL9;Q6NNT3	Serine/threonine-protein phosphatase;Serine/threonine-protein phosphatase alpha-1 isoform	Pp1alpha-96A	tr|A0A0B4KHS9|A0A0B4KHS9_DROME Serine/threonine-protein phosphatase OS=Drosophila melanogaster OX=7227 GN=Pp1alpha-96A PE=3 SV=1;sp|P48461|PP11_DROME Serine/threonine-protein phosphatase alpha-1 isoform OS=Drosophila melanogaster OX=7227 GN=Pp1alpha-96A PE	9	9	1	37.37	327	21.1	36.1	0	184420
Q9V3D9;Q8T3P8		Srp54k	tr|Q9V3D9|Q9V3D9_DROME Signal recognition particle 54 kDa protein OS=Drosophila melanogaster OX=7227 GN=Srp54k PE=1 SV=1;tr|Q8T3P8|Q8T3P8_DROME Signal recognition particle 54 kDa protein OS=Drosophila melanogaster OX=7227 GN=Srp54k PE=2 SV=1	2	7	7	55.865	508	11.4	19.5	7605900	6598600
Q9VLS9	Beta-lactamase-like protein 2 homolog	CG12375	sp|Q9VLS9|LACB2_DROME Beta-lactamase-like protein 2 homolog OS=Drosophila melanogaster OX=7227 GN=CG12375 PE=2 SV=1	1	2	2	32.733	292	8.6	14.7	671760	1573200
Q7KPK6;O61444;Q7KPX5		Mkk4	tr|Q7KPK6|Q7KPK6_DROME JNK kinase 2 OS=Drosophila melanogaster OX=7227 GN=Mkk4 PE=2 SV=1;tr|O61444|O61444_DROME MAP kinase kinase 4, isoform A OS=Drosophila melanogaster OX=7227 GN=Mkk4 PE=1 SV=1;tr|Q7KPX5|Q7KPX5_DROME MAP kinase kinase 4 OS=Drosophila mel	3	5	5	47.545	424	12	20.5	1110400	2787400
A1YK36;A1YK35;A1YK38;A1YK33;A1YK27;A1YK25;A1YK24		Nup98-96	tr|A1YK36|A1YK36_DROME Nup98 (Fragment) OS=Drosophila melanogaster OX=7227 GN=Nup98-96 PE=4 SV=1;tr|A1YK35|A1YK35_DROME Nup98 (Fragment) OS=Drosophila melanogaster OX=7227 GN=Nup98-96 PE=4 SV=1;tr|A1YK38|A1YK38_DROME Nup98 (Fragment) OS=Drosophila melanoga	7	4	1	45.623	413	9.9	16.9	3758600	1890800
Q9VGM1		Mrp4	tr|Q9VGM1|Q9VGM1_DROME Multidrug resistance protein 4 OS=Drosophila melanogaster OX=7227 GN=Mrp4 PE=1 SV=2	1	4	2	147.88	1316	2.7	4.6	115640	676800
F3YDM3;Q6AWN0	1,2-dihydroxy-3-keto-5-methylthiopentene dioxygenase	CG32068-RB;CG32068	tr|F3YDM3|F3YDM3_DROME RH18256p (Fragment) OS=Drosophila melanogaster OX=7227 GN=CG32068-RB PE=2 SV=1;sp|Q6AWN0|MTND_DROME 1,2-dihydroxy-3-keto-5-methylthiopentene dioxygenase OS=Drosophila melanogaster OX=7227 GN=Adi1 PE=2 SV=2	2	2	2	23.957	201	7	11.9	1669600	1013600
Q9VM75	HEAT repeat-containing protein 1 homolog	l(2)k09022	sp|Q9VM75|HEAT1_DROME HEAT repeat-containing protein 1 homolog OS=Drosophila melanogaster OX=7227 GN=l(2)k09022 PE=2 SV=2	1	2	2	237.22	2096	1	1.7	35574	155670
P56538	Eukaryotic translation initiation factor 6	eIF6	sp|P56538|IF6_DROME Eukaryotic translation initiation factor 6 OS=Drosophila melanogaster OX=7227 GN=eIF6 PE=2 SV=3	1	6	6	26.494	245	30.6	51.8	9448700	9723500
Q9W379		Zpr1	tr|Q9W379|Q9W379_DROME LD37736p OS=Drosophila melanogaster OX=7227 GN=Zpr1 PE=1 SV=1	1	3	3	51.3	457	7.4	12.5	860790	1457200
A0A0B4LF93;O17143;A1Z928;O17142;A1Z927;A0A126GUN9;A0A0B4LF82;O77025;Q5U0Y0;A0A0B4K765;J7KHF5;J7KEE9;J7KED4;J7KB13;J7K9E8		Sin3A	tr|A0A0B4LF93|A0A0B4LF93_DROME Sin3A, isoform I OS=Drosophila melanogaster OX=7227 GN=Sin3A PE=1 SV=1;tr|O17143|O17143_DROME Transcriptional co-repressor SIN3A OS=Drosophila melanogaster OX=7227 GN=Sin3A PE=2 SV=1;tr|A1Z928|A1Z928_DROME Sin3A, isoform D OS	15	5	5	186.4	1747	1.6	2.7	733050	3124900
M9MS06;F0JAG6;M9PGA7;P18091	Alpha-actinin, sarcomeric	Actn	tr|M9MS06|M9MS06_DROME Alpha actinin, isoform D OS=Drosophila melanogaster OX=7227 GN=Actn PE=1 SV=1;tr|F0JAG6|F0JAG6_DROME Alpha actinin, isoform F OS=Drosophila melanogaster OX=7227 GN=Actn PE=1 SV=1;tr|M9PGA7|M9PGA7_DROME Alpha actinin, isoform G OS=Dro	4	5	5	103.83	895	4.1	6.9	1169100	1903900
Q9VRL2	Probable Golgi SNAP receptor complex member 2	membrin	sp|Q9VRL2|GOSR2_DROME Probable Golgi SNAP receptor complex member 2 OS=Drosophila melanogaster OX=7227 GN=Membrin PE=2 SV=1	1	4	4	24.833	216	17.1	28.7	933440	2077200
D1Z3A2;Q24407	ATP synthase-coupling factor 6, mitochondrial	ATPsyn-Cf6-RA;ATPsyn-Cf6	tr|D1Z3A2|D1Z3A2_DROME ATP synthase-coupling factor 6, mitochondrial OS=Drosophila melanogaster OX=7227 GN=ATPsynCF6 PE=1 SV=1;sp|Q24407|ATP5J_DROME ATP synthase-coupling factor 6, mitochondrial OS=Drosophila melanogaster OX=7227 GN=ATPsynCf6 PE=3 SV=1	2	4	4	11.936	106	20.8	34.9	585210	5508200
Q9VUH6;Q960G3		mop	tr|Q9VUH6|Q9VUH6_DROME Myopic OS=Drosophila melanogaster OX=7227 GN=mop PE=1 SV=2;tr|Q960G3|Q960G3_DROME SD03094p OS=Drosophila melanogaster OX=7227 GN=mop PE=2 SV=1	2	7	7	200.33	1833	3.1	5.2	3844800	2396400
M9NE01;Q27889;M9NEL1;Q9VXF1;A0A0B4K6N5;A0A0B4K6V6;P48456	Serine/threonine-protein phosphatase;Serine/threonine-protein phosphatase 2B catalytic subunit 2;Serine/threonine-protein phosphatase 2B catalytic subunit 3	Pp2B-14D;CanA-14F	tr|M9NE01|M9NE01_DROME Serine/threonine-protein phosphatase OS=Drosophila melanogaster OX=7227 GN=Pp2B-14D PE=3 SV=1;sp|Q27889|PP2B2_DROME Serine/threonine-protein phosphatase 2B catalytic subunit 2 OS=Drosophila melanogaster OX=7227 GN=Pp2B-14D PE=1 SV=2;	7	6	6	63.1	570	9.3	15.6	1430800	3827200
Q9VC87			tr|Q9VC87|Q9VC87_DROME RE57978p OS=Drosophila melanogaster OX=7227 GN=Dmel\CG18528 PE=1 SV=3	1	5	5	54.945	493	9.9	16.6	474630	2537400
Q9VNF5;Q8IGI4;Q95SJ9	3-oxoacyl-[acyl-carrier-protein] synthase	CG12170	tr|Q9VNF5|Q9VNF5_DROME 3-oxoacyl-[acyl-carrier-protein] synthase OS=Drosophila melanogaster OX=7227 GN=Dmel\CG12170 PE=1 SV=1;tr|Q8IGI4|Q8IGI4_DROME RH10820p (Fragment) OS=Drosophila melanogaster OX=7227 GN=CG12170 PE=2 SV=1	3	3	3	46.378	438	7.1	11.9	369610	1391200
Q7K3M5		Dhx15	tr|Q7K3M5|Q7K3M5_DROME DEAH-box helicase 15, isoform A OS=Drosophila melanogaster OX=7227 GN=Dhx15 PE=1 SV=1	1	6	6	82.651	729	5.5	9.2	661540	1790200
Q7JXZ2;O97121		Eip55E	tr|Q7JXZ2|Q7JXZ2_DROME Eip55E, isoform A OS=Drosophila melanogaster OX=7227 GN=Eip55E PE=1 SV=1;tr|O97121|O97121_DROME Ecdysteroid-inducible polypeptide EIP40 OS=Drosophila melanogaster OX=7227 GN=Eip55E PE=3 SV=1	2	9	9	42.988	393	20.1	33.6	14565000	17747000
E8NH33;A8JV25;A8JV19;Q9VXA5;Q7KUX2;Q8T0R6;M9PHT3;B8A431		CG4829-RD;CG4829-RA;CG4829;CG4829-RB	tr|E8NH33|E8NH33_DROME RE65605p OS=Drosophila melanogaster OX=7227 GN=CG4829-RD PE=2 SV=1;tr|A8JV25|A8JV25_DROME Uncharacterized protein, isoform D OS=Drosophila melanogaster OX=7227 GN=Dmel\CG4829 PE=1 SV=1;tr|A8JV19|A8JV19_DROME Uncharacterized protein,	8	8	8	74.297	687	12.1	20.2	14704000	3493000
Q0KHQ1;C4IXV9		SLIRP1;CG33714-RA	tr|Q0KHQ1|Q0KHQ1_DROME GEO13361p1 OS=Drosophila melanogaster OX=7227 GN=SLIRP1 PE=1 SV=1;tr|C4IXV9|C4IXV9_DROME GM17572p (Fragment) OS=Drosophila melanogaster OX=7227 GN=CG33714-RA PE=2 SV=1	2	2	2	10.031	90	13.3	22.2	1943300	1787200
A0A0B4K6U2;E1JIJ7;Q8INH9;A0A0B4K6G6;Q9VG05;Q8MQW9		CG7518	tr|A0A0B4K6U2|A0A0B4K6U2_DROME Uncharacterized protein, isoform G OS=Drosophila melanogaster OX=7227 GN=Dmel\CG7518 PE=1 SV=1;tr|E1JIJ7|E1JIJ7_DROME Uncharacterized protein, isoform I OS=Drosophila melanogaster OX=7227 GN=Dmel\CG7518 PE=1 SV=2;tr|Q8INH9|Q8	6	2	2	252.51	2306	1.2	2	297130	939010
Q9VC36;Q7YU13;B7FNJ0		polybromo;polybromo-RA	tr|Q9VC36|Q9VC36_DROME Polybromo OS=Drosophila melanogaster OX=7227 GN=polybromo PE=1 SV=1;tr|Q7YU13|Q7YU13_DROME LD26355p OS=Drosophila melanogaster OX=7227 GN=polybromo PE=2 SV=1;tr|B7FNJ0|B7FNJ0_DROME FI03643p (Fragment) OS=Drosophila melanogaster OX=72	3	2	2	189.69	1654	1.2	2	160450	452510
Q9VVI1			tr|Q9VVI1|Q9VVI1_DROME LD04387p OS=Drosophila melanogaster OX=7227 GN=Dmel\CG7564 PE=1 SV=1	1	2	2	48.415	420	5.7	9.5	92605	689240
Q9VEA1;Q9NJB4		eIF-1A	tr|Q9VEA1|Q9VEA1_DROME Eukaryotic translation initiation factor 1A, isoform A OS=Drosophila melanogaster OX=7227 GN=eIF1A PE=1 SV=1;tr|Q9NJB4|Q9NJB4_DROME Eukaryotic translation initiation factor 1A OS=Drosophila melanogaster OX=7227 GN=eIF1A PE=2 SV=1	2	4	4	17.096	148	14.2	23.6	3314000	3209900
M9NE07;Q9VXB0	NECAP-like protein CG9132	CG9132	tr|M9NE07|M9NE07_DROME Uncharacterized protein, isoform C OS=Drosophila melanogaster OX=7227 GN=CG32566 PE=4 SV=1;sp|Q9VXB0|NECAP_DROME NECAP-like protein CG9132 OS=Drosophila melanogaster OX=7227 GN=CG9132 PE=2 SV=1	2	4	4	21.66	204	20.1	33.3	1541100	1699000
Q9VW57		Grasp65	tr|Q9VW57|Q9VW57_DROME Grasp65 OS=Drosophila melanogaster OX=7227 GN=Grasp65 PE=1 SV=1	1	4	4	47.723	460	9.6	15.9	9905900	5502400
Q9VKM3		ATPsynG	tr|Q9VKM3|Q9VKM3_DROME ATP synthase, subunit G, isoform A OS=Drosophila melanogaster OX=7227 GN=ATPsynG PE=1 SV=1	1	4	4	10.872	99	23.2	38.4	14698000	11332000
Q7KRW8;C8VV03	Pre-mRNA-processing factor 39	CG1646;CG1646-RC	sp|Q7KRW8|PRP39_DROME Pre-mRNA-processing factor 39 OS=Drosophila melanogaster OX=7227 GN=CG1646 PE=1 SV=1;tr|C8VV03|C8VV03_DROME RE67017p OS=Drosophila melanogaster OX=7227 GN=CG1646-RC PE=2 SV=1	2	2	2	120.54	1066	2.3	3.8	481540	839830
E8NH07;Q9U6Y9	Protein arginine N-methyltransferase;Protein arginine N-methyltransferase 5	csul-RB;csul	tr|E8NH07|E8NH07_DROME Protein arginine N-methyltransferase (Fragment) OS=Drosophila melanogaster OX=7227 GN=csul-RB PE=2 SV=1;sp|Q9U6Y9|ANM5_DROME Protein arginine N-methyltransferase 5 OS=Drosophila melanogaster OX=7227 GN=csul PE=1 SV=2	2	3	3	69.306	606	4.3	7.1	1179700	1800100
H9XVP3;Q9V491;O96681;Q0KIF1;G7H847;Q7YU07;Q8STG6;Q86M56		PlexA;plexA-RB	tr|H9XVP3|H9XVP3_DROME Plexin A, isoform F OS=Drosophila melanogaster OX=7227 GN=PlexA PE=1 SV=1;tr|Q9V491|Q9V491_DROME Plexin A, isoform A OS=Drosophila melanogaster OX=7227 GN=PlexA PE=1 SV=1;tr|O96681|O96681_DROME Plexin A OS=Drosophila melanogaster OX=	8	5	5	216.43	1928	2	3.3	835220	2413900
Q7K1M4			tr|Q7K1M4|Q7K1M4_DROME SD04017p OS=Drosophila melanogaster OX=7227 GN=Dmel\CG1902 PE=1 SV=1	1	5	5	35.791	312	11.9	19.6	5115600	5050100
Q9VBV5	Nucleotide exchange factor SIL1	CG10420	sp|Q9VBV5|SIL1_DROME Nucleotide exchange factor SIL1 OS=Drosophila melanogaster OX=7227 GN=CG10420 PE=2 SV=1	1	3	3	47.942	429	5.1	8.4	1264200	1276100
Q8T3L6	Probable malonyl-CoA-acyl carrier protein transacylase, mitochondrial	beg	sp|Q8T3L6|FABD_DROME Probable malonyl-CoA-acyl carrier protein transacylase, mitochondrial OS=Drosophila melanogaster OX=7227 GN=beg PE=2 SV=2	1	4	4	42.085	379	10.3	16.9	2064900	1723900
Q9VG23;Q86PF4		CG10126-RB	tr|Q9VG23|Q9VG23_DROME GH22994p OS=Drosophila melanogaster OX=7227 GN=Dmel\CG10126 PE=1 SV=2;tr|Q86PF4|Q86PF4_DROME GH08978p OS=Drosophila melanogaster OX=7227 GN=Dmel\CG10126 PE=1 SV=2	2	4	4	24.394	215	15.3	25.1	1557500	5631800
Q9VT60;Q7KUD4;Q29R25;Q8MR13		iPLA2-VIA;CG6718	tr|Q9VT60|Q9VT60_DROME Calcium-independent phospholipase A2 VIA, isoform A OS=Drosophila melanogaster OX=7227 GN=iPLA2-VIA PE=1 SV=3;tr|Q7KUD4|Q7KUD4_DROME Calcium-independent phospholipase A2 VIA, isoform B OS=Drosophila melanogaster OX=7227 GN=iPLA2-VIA	4	6	6	96.862	877	8.6	14.1	1695000	4417800
Q7KSM5;Q7KJV5;A0ANV7;Q9VG70;A0ANV9;A0ANV4;A0ANW1		Aos1;CG12276	tr|Q7KSM5|Q7KSM5_DROME Activator of SUMO 1 OS=Drosophila melanogaster OX=7227 GN=Aos1 PE=1 SV=1;tr|Q7KJV5|Q7KJV5_DROME Ubiquitin-like protein activating enzyme N subunit OS=Drosophila melanogaster OX=7227 GN=Aos1 PE=2 SV=1;tr|A0ANV7|A0ANV7_DROME CG12276 pr	7	11	11	37.673	337	28.8	47.2	14481000	19149000
P55162	Membrane-associated protein Hem	Hem	sp|P55162|HEM_DROME Membrane-associated protein Hem OS=Drosophila melanogaster OX=7227 GN=Hem PE=2 SV=1	1	9	9	129.38	1126	7.2	11.8	1169900	3555600
A4V0U4;Q9VJ39	Leukotriene A(4) hydrolase		tr|A4V0U4|A4V0U4_DROME Leukotriene A(4) hydrolase OS=Drosophila melanogaster OX=7227 GN=pepCG10602 PE=1 SV=1;tr|Q9VJ39|Q9VJ39_DROME Leukotriene A(4) hydrolase OS=Drosophila melanogaster OX=7227 GN=Dmel\CG10602 PE=1 SV=4	2	16	16	68.489	613	24.3	39.8	11262000	17656000
Q9W5W7			tr|Q9W5W7|Q9W5W7_DROME GH19483p OS=Drosophila melanogaster OX=7227 GN=Dmel\CG9581 PE=1 SV=1	1	4	4	60.879	545	9.2	15	1868900	4044400
Q9VU39;Q9VU38;Q86NZ5		AdenoK	tr|Q9VU39|Q9VU39_DROME Adenosine kinase, isoform A OS=Drosophila melanogaster OX=7227 GN=AdenoK PE=1 SV=1;tr|Q9VU38|Q9VU38_DROME Adenosine kinase, isoform B OS=Drosophila melanogaster OX=7227 GN=AdenoK PE=1 SV=1;tr|Q86NZ5|Q86NZ5_DROME LP07155p (Fragment) O	3	2	2	37.675	345	7.5	12.2	636290	1590800
N0A733;Q9V4S8	COP9 signalosome complex subunit 7	CSN7-RA;CSN7	tr|N0A733|N0A733_DROME FI20803p1 OS=Drosophila melanogaster OX=7227 GN=CSN7-RA PE=2 SV=1;sp|Q9V4S8|CSN7_DROME COP9 signalosome complex subunit 7 OS=Drosophila melanogaster OX=7227 GN=CSN7 PE=1 SV=2	2	3	3	31.067	278	10.4	16.9	827620	2200100
C9QP20;Q9VIU7	Probable dolichol-phosphate mannosyltransferase	CG10166-RA;CG10166	tr|C9QP20|C9QP20_DROME Dolichol-phosphate mannosyltransferase subunit 1 (Fragment) OS=Drosophila melanogaster OX=7227 GN=CG10166-RA PE=2 SV=1;sp|Q9VIU7|DPM1_DROME Probable dolichol-phosphate mannosyltransferase OS=Drosophila melanogaster OX=7227 GN=CG10166	2	4	4	27.89	248	10.9	17.7	0	2157800
Q95X10;A1Z7P1;Q86NU8;Q95RR7;Q5BHU7		Pmm45A	tr|Q95X10|Q95X10_DROME Phosphomannomutase 45A OS=Drosophila melanogaster OX=7227 GN=Pgm2a PE=2 SV=1;tr|A1Z7P1|A1Z7P1_DROME Phosphomannomutase 45A OS=Drosophila melanogaster OX=7227 GN=Pgm2a PE=1 SV=1;tr|Q86NU8|Q86NU8_DROME AT28824p (Fragment) OS=Drosophila	5	4	4	68.392	609	6.1	9.9	553620	2074600
A0A0B4LGI1;P20354;M9PDM5;P16378;P25157	G protein alpha s subunit	Galphas	tr|A0A0B4LGI1|A0A0B4LGI1_DROME G protein alpha s subunit, isoform E OS=Drosophila melanogaster OX=7227 GN=Galphas PE=1 SV=1;sp|P20354|GNAS_DROME G protein alpha s subunit OS=Drosophila melanogaster OX=7227 GN=Galphas PE=2 SV=1	5	4	3	44.699	382	8.9	14.4	1159400	2027000
G2J611;Q9W415;F6J3W4;F6J3W3;F6J3W2;F6J3W1	tRNA (guanine-N(7)-)-methyltransferase non-catalytic subunit wuho	wuho-RA;wuho	tr|G2J611|G2J611_DROME tRNA (guanine-N(7)-)-methyltransferase non-catalytic subunit wuho OS=Drosophila melanogaster OX=7227 GN=wuho-RA PE=2 SV=1;sp|Q9W415|WUHO_DROME tRNA (guanine-N(7)-)-methyltransferase non-catalytic subunit wuho OS=Drosophila melanogast	6	8	8	46.498	424	19.1	30.9	4488400	5987500
C4JC86;A0A0B4LHU8;A8MPH9;P21525	Transcription factor kayak, isoforms D/sro;Transcription factor kayak, isoforms A/B/F	kay-RA;kay	tr|C4JC86|C4JC86_DROME LD16083p OS=Drosophila melanogaster OX=7227 GN=kay-RA PE=2 SV=1;tr|A0A0B4LHU8|A0A0B4LHU8_DROME Kayak, isoform G OS=Drosophila melanogaster OX=7227 GN=kay PE=1 SV=1;sp|A8MPH9|FOSLD_DROME Transcription factor kayak, isoforms D/sro OS=D	4	4	4	62.811	595	4.7	7.6	2697000	2898000
Q9VEC2		CG12321-RA	tr|Q9VEC2|Q9VEC2_DROME Proteasome assembly chaperone 2 OS=Drosophila melanogaster OX=7227 GN=Dmel\CG12321 PE=1 SV=1	1	5	5	27.803	247	13.8	22.3	3746800	7979100
Q6LEH1		Tm1	tr|Q6LEH1|Q6LEH1_DROME Uncharacterized protein (Fragment) OS=Drosophila melanogaster OX=7227 GN=Tm1 PE=3 SV=1	1	6	1	30.851	270	8.5	13.7	0	3047700
Q7KN94;Q7KLW5		wal	tr|Q7KN94|Q7KN94_DROME Walrus, isoform A OS=Drosophila melanogaster OX=7227 GN=wal PE=1 SV=1;tr|Q7KLW5|Q7KLW5_DROME LD07532p (Fragment) OS=Drosophila melanogaster OX=7227 GN=wal PE=2 SV=1	2	7	7	34.181	330	26.7	43	9975300	11688000
Q9VKC8;Q8MT29		Tom70	tr|Q9VKC8|Q9VKC8_DROME FI03495p OS=Drosophila melanogaster OX=7227 GN=Tom70 PE=1 SV=2;tr|Q8MT29|Q8MT29_DROME RE66761p OS=Drosophila melanogaster OX=7227 GN=Tom70 PE=2 SV=1	2	8	8	66.363	589	12.4	19.9	9983700	6308600
Q9W3H4		sni	tr|Q9W3H4|Q9W3H4_DROME LD36273p OS=Drosophila melanogaster OX=7227 GN=sni PE=1 SV=1	1	5	5	26.512	247	21.5	34.4	1449500	3274100
Q9VY91;B4YX27;B4YX26;F6J2H2;F6J2G8;F6J2G6;F6J2G4;A9YHE2;A9YHD3;A9YHD2		Pdcd4	tr|Q9VY91|Q9VY91_DROME LD21074p OS=Drosophila melanogaster OX=7227 GN=Pdcd4 PE=1 SV=2	10	5	5	56.354	509	10.2	16.3	12535000	10248000
Q9VYG8;C0MLD8;C0MLC9;B4F5F8;B4F5F6;B4F5F5;B4F5F4;B4F5F3;B4F5F0		CG15717	tr|Q9VYG8|Q9VYG8_DROME CG15717-PA OS=Drosophila melanogaster OX=7227 GN=Dmel\CG15717 PE=1 SV=1;tr|C0MLD8|C0MLD8_DROME CG15717-PA OS=Drosophila melanogaster OX=7227 GN=CG15717 PE=4 SV=1;tr|C0MLC9|C0MLC9_DROME CG15717-PA OS=Drosophila melanogaster OX=7227 GN	9	2	2	27.766	252	6.7	10.7	1012800	670380
Q8T9D5;Q7KV27;Q9VYD9		CG1640	tr|Q8T9D5|Q8T9D5_DROME SD05601p OS=Drosophila melanogaster OX=7227 GN=CG1640 PE=2 SV=1;tr|Q7KV27|Q7KV27_DROME Uncharacterized protein, isoform A OS=Drosophila melanogaster OX=7227 GN=ALT PE=1 SV=1;tr|Q9VYD9|Q9VYD9_DROME AT04676p OS=Drosophila melanogaster	3	9	9	63.155	568	12.9	20.6	4393600	4376200
Q9V3T8;C1C547		SC35;SC35-RB	tr|Q9V3T8|Q9V3T8_DROME LD32469p OS=Drosophila melanogaster OX=7227 GN=SC35 PE=1 SV=1;tr|C1C547|C1C547_DROME MIP01221p OS=Drosophila melanogaster OX=7227 GN=SC35-RB PE=2 SV=1	2	3	3	21.4	195	9.7	15.4	2391400	1607900
P45889	Actin-related protein 1	Arp1	sp|P45889|ACTZ_DROME Actin-related protein 1 OS=Drosophila melanogaster OX=7227 GN=Arp1 PE=2 SV=2	1	4	4	42.719	376	10.6	16.8	8627800	6151200
A1Z8D0		nclb	sp|A1Z8D0|PWP1_DROME Periodic tryptophan protein 1 homolog OS=Drosophila melanogaster OX=7227 GN=nclb PE=1 SV=1	1	8	8	51.391	459	18.3	29	9780900	5218000
Q6NP22;Q3ZAN3;A1Z843;B9EQR0;Q95SU3		CG1371;CG1371-RA	tr|Q6NP22|Q6NP22_DROME LD47325p (Fragment) OS=Drosophila melanogaster OX=7227 GN=CG1371 PE=2 SV=1;tr|Q3ZAN3|Q3ZAN3_DROME LD18215p OS=Drosophila melanogaster OX=7227 GN=CG1371 PE=2 SV=1;tr|A1Z843|A1Z843_DROME Uncharacterized protein OS=Drosophila melanogast	5	6	6	129.82	1190	5	7.9	3196800	4420300
Q9VDV3	Probable nucleoporin Nup58	Nup58	sp|Q9VDV3|NUP58_DROME Probable nucleoporin Nup58 OS=Drosophila melanogaster OX=7227 GN=Nup58 PE=2 SV=1	1	3	3	55.527	546	3.8	6	3523200	1841500
Q9VMI3;Q8SXT0		ND-51	tr|Q9VMI3|Q9VMI3_DROME NADH dehydrogenase [ubiquinone] flavoprotein 1, mitochondrial OS=Drosophila melanogaster OX=7227 GN=ND-51 PE=1 SV=1;tr|Q8SXT0|Q8SXT0_DROME RE33648p OS=Drosophila melanogaster OX=7227 GN=ND-51 PE=2 SV=1	2	3	3	51.83	474	6.3	9.9	1172000	1720100
Q8IA36;Q9W253		mRpS29	tr|Q8IA36|Q8IA36_DROME DAP3 OS=Drosophila melanogaster OX=7227 GN=mRpS29 PE=4 SV=1;tr|Q9W253|Q9W253_DROME LD41023p OS=Drosophila melanogaster OX=7227 GN=mRpS29 PE=1 SV=1	2	2	2	44.071	390	4.9	7.7	1036600	2243700
A8E6L0;Q9VE52;Q86NL1		CstF-64	tr|A8E6L0|A8E6L0_DROME FI01808p OS=Drosophila melanogaster OX=7227 GN=CstF-64 PE=2 SV=1;tr|Q9VE52|Q9VE52_DROME Cleavage stimulation factor 64 kD subunit OS=Drosophila melanogaster OX=7227 GN=CstF64 PE=1 SV=2;tr|Q86NL1|Q86NL1_DROME RE27227p OS=Drosophila me	3	2	2	26.283	242	9.5	14.9	105580	983580
X2JKU5;Q24186;Q9VFE4;A0A0B4K683	40S ribosomal protein S5a;40S ribosomal protein S5b	RpS5a;RpS5b	tr|X2JKU5|X2JKU5_DROME Ribosomal protein S5a, isoform B OS=Drosophila melanogaster OX=7227 GN=RpS5a PE=3 SV=1;sp|Q24186|RS5A_DROME 40S ribosomal protein S5a OS=Drosophila melanogaster OX=7227 GN=RpS5a PE=1 SV=1;sp|Q9VFE4|RS5B_DROME 40S ribosomal protein S5	4	11	11	25.434	228	33.3	52.2	104120000	83359000
I0B1N8;Q7KW39;A9UN30	Probable methylmalonate-semialdehyde dehydrogenase [acylating], mitochondrial	CG17896-RB;CG17896;EG:171D11.1	tr|I0B1N8|I0B1N8_DROME FI19805p1 (Fragment) OS=Drosophila melanogaster OX=7227 GN=CG17896-RB PE=2 SV=1;sp|Q7KW39|MMSA_DROME Probable methylmalonate-semialdehyde dehydrogenase [acylating], mitochondrial OS=Drosophila melanogaster OX=7227 GN=CG17896 PE=2 SV=	3	9	9	57.665	535	20.2	31.6	14720000	16391000
A0A0B4KHS7;A0A0B4KGE1;Q24151;A0A0B4KHS6;A0A0B4KH10;A0A0B4KGI7;D2NUE7	Signal transducer and activator of transcription;Signal transducer and transcription activator	Stat92E;Stat92E-RE	tr|A0A0B4KHS7|A0A0B4KHS7_DROME Signal transducer and activator of transcription OS=Drosophila melanogaster OX=7227 GN=Stat92E PE=3 SV=1;tr|A0A0B4KGE1|A0A0B4KGE1_DROME Signal transducer and activator of transcription OS=Drosophila melanogaster OX=7227 GN=St	7	7	7	86.414	761	9.6	15	4434200	9500500
Q9VVU1;Q95U46		CG3902-RA;CG3902	tr|Q9VVU1|Q9VVU1_DROME FI09602p OS=Drosophila melanogaster OX=7227 GN=CT12987 PE=1 SV=1;tr|Q95U46|Q95U46_DROME GH07925p OS=Drosophila melanogaster OX=7227 GN=CG3902 PE=2 SV=1	2	12	12	45.366	414	23.2	36.2	27691000	16352000
Q9VB51			tr|Q9VB51|Q9VB51_DROME GEO08385p1 OS=Drosophila melanogaster OX=7227 GN=Dmel\CG5934 PE=1 SV=1	1	2	2	15.016	135	13.3	20.7	202480	606600
Q9VDV2			tr|Q9VDV2|Q9VDV2_DROME AT06125p OS=Drosophila melanogaster OX=7227 GN=BEST:GH15838 PE=1 SV=1	1	5	5	40.636	363	9.6	14.9	1586800	3125200
Q7K0F7			tr|Q7K0F7|Q7K0F7_DROME Carbonyl reductase, isoform A OS=Drosophila melanogaster OX=7227 GN=Dmel\CG11200 PE=1 SV=1	1	5	5	39.643	355	10.7	16.6	3283600	2214300
Q5U0U9;A1Z7J7;A1Z7J6;A0A0B4LEY1;A0A0B4LEZ1;Q961K5		Sec31	tr|Q5U0U9|Q5U0U9_DROME AT25839p OS=Drosophila melanogaster OX=7227 GN=Sec31 PE=2 SV=1;tr|A1Z7J7|A1Z7J7_DROME Secretory 31, isoform A OS=Drosophila melanogaster OX=7227 GN=Sec31 PE=1 SV=1;tr|A1Z7J6|A1Z7J6_DROME Secretory 31, isoform B OS=Drosophila melanoga	6	21	21	135.99	1240	15.1	23.4	21711000	25277000
B5X0J6;Q9V9J3;A1Z6I9	Non-specific protein-tyrosine kinase;Tyrosine-protein kinase Src42A	Src42A-RB;Src42A	tr|B5X0J6|B5X0J6_DROME Tyrosine-protein kinase OS=Drosophila melanogaster OX=7227 GN=Src42A-RB PE=2 SV=1;sp|Q9V9J3|SRC42_DROME Tyrosine-protein kinase Src42A OS=Drosophila melanogaster OX=7227 GN=Src42A PE=1 SV=1;tr|A1Z6I9|A1Z6I9_DROME Src oncogene at 42A,	3	4	4	59.069	517	6.4	9.9	2384100	2759000
Q8IMX8;Q8IGW7		LSm3	tr|Q8IMX8|Q8IMX8_DROME U6 snRNA-associated Sm-like protein LSm3 OS=Drosophila melanogaster OX=7227 GN=LSm3 PE=1 SV=1;tr|Q8IGW7|Q8IGW7_DROME U6 snRNA-associated Sm-like protein LSm3 OS=Drosophila melanogaster OX=7227 GN=LSm3 PE=2 SV=1	2	2	2	11.857	103	21.4	33	1185400	1522500
Q9VB23		wdb	tr|Q9VB23|Q9VB23_DROME Serine/threonine protein phosphatase 2A regulatory subunit OS=Drosophila melanogaster OX=7227 GN=wdb PE=1 SV=2	1	3	2	59.726	524	4.8	7.4	1018100	1355400
Q5BI67;A8JUU1;X2JJP5;A8JUU3;X2JEY9;M9PHF1;X2JEM2;Q8T0U9		Sec16	tr|Q5BI67|Q5BI67_DROME LP14866p OS=Drosophila melanogaster OX=7227 GN=Sec16 PE=2 SV=1;tr|A8JUU1|A8JUU1_DROME Secretory 16, isoform E OS=Drosophila melanogaster OX=7227 GN=Sec16 PE=1 SV=1;tr|X2JJP5|X2JJP5_DROME Secretory 16, isoform H OS=Drosophila melanoga	8	4	4	213.17	1953	2.4	3.7	2083900	2707300
Q9VAH9		IntS11	sp|Q9VAH9|INT11_DROME Integrator complex subunit 11 OS=Drosophila melanogaster OX=7227 GN=IntS11 PE=1 SV=1	1	3	3	67.591	597	3.7	5.7	2250000	1761000
Q9VFQ9		Dip-B	tr|Q9VFQ9|Q9VFQ9_DROME Dipeptidase B, isoform A OS=Drosophila melanogaster OX=7227 GN=Dip-B PE=1 SV=2	1	14	14	55.533	508	24.8	38.2	22696000	23117000
Q6NP77;Q8IP62		mRpS23	tr|Q6NP77|Q6NP77_DROME RE74912p OS=Drosophila melanogaster OX=7227 PE=2 SV=1;tr|Q8IP62|Q8IP62_DROME Mitochondrial ribosomal protein S23 OS=Drosophila melanogaster OX=7227 GN=mRpS23 PE=1 SV=1	2	3	3	17.279	149	17.4	26.8	2543600	1961500
Q9V3C8;Q6NPB1;Q24080		Shc	tr|Q9V3C8|Q9V3C8_DROME DShc protein OS=Drosophila melanogaster OX=7227 GN=Shc PE=1 SV=1;tr|Q6NPB1|Q6NPB1_DROME RH57813p OS=Drosophila melanogaster OX=7227 GN=Shc PE=2 SV=1;tr|Q24080|Q24080_DROME DShc OS=Drosophila melanogaster OX=7227 GN=Shc PE=2 SV=1	3	4	4	45.004	409	7.8	12	609610	1796900
Q9VQ76;M9PE28;E2QCS8		tho2	tr|Q9VQ76|Q9VQ76_DROME LD36155p OS=Drosophila melanogaster OX=7227 GN=tho2 PE=1 SV=2;tr|M9PE28|M9PE28_DROME Tho2, isoform C OS=Drosophila melanogaster OX=7227 GN=tho2 PE=1 SV=1;tr|E2QCS8|E2QCS8_DROME Tho2, isoform B OS=Drosophila melanogaster OX=7227 GN=th	3	2	2	188.51	1641	1.3	2	0	480320
B5RIG9;Q8SYG2	COP9 signalosome complex subunit 3	CSN3	tr|B5RIG9|B5RIG9_DROME FI02069p (Fragment) OS=Drosophila melanogaster OX=7227 PE=2 SV=1;sp|Q8SYG2|CSN3_DROME COP9 signalosome complex subunit 3 OS=Drosophila melanogaster OX=7227 GN=CSN3 PE=2 SV=2	2	3	3	55.011	482	7.3	11.2	358350	1683500
Q9VTY8;M9PI41;Q6NR17		sti	tr|Q9VTY8|Q9VTY8_DROME Non-specific serine/threonine protein kinase OS=Drosophila melanogaster OX=7227 GN=sti PE=1 SV=2;tr|M9PI41|M9PI41_DROME Non-specific serine/threonine protein kinase OS=Drosophila melanogaster OX=7227 GN=sti PE=1 SV=1	3	5	5	211.32	1854	3.2	4.9	331530	2060300
Q9VEQ2;Q8SXY3;Q9VEQ1;Q8SZM8		CG17556-RA;CG17556	tr|Q9VEQ2|Q9VEQ2_DROME GH23451p OS=Drosophila melanogaster OX=7227 GN=Dmel\CG3678 PE=1 SV=2;tr|Q8SXY3|Q8SXY3_DROME RE62710p OS=Drosophila melanogaster OX=7227 GN=CG17556 PE=2 SV=1;tr|Q9VEQ1|Q9VEQ1_DROME LD10670p OS=Drosophila melanogaster OX=7227 GN=Dmel\C	4	6	6	32.744	282	19.5	29.8	1897300	3516900
A8JV02;Q3KN62;M9PDW3;M9PJ79;M9PH75;X2JEC4;A8JUZ9;M9MS17;M9PH82;A8JUZ8;M9PJ82;E2QD99;X2JIN0;M9MSA5;X2JDY1;A8JV00;M9PGT0;M9PDW8		CG3950	tr|A8JV02|A8JV02_DROME Uncharacterized protein, isoform C OS=Drosophila melanogaster OX=7227 GN=CG3950 PE=1 SV=1;tr|Q3KN62|Q3KN62_DROME SD12752p OS=Drosophila melanogaster OX=7227 GN=CG3950 PE=2 SV=1;tr|M9PDW3|M9PDW3_DROME Uncharacterized protein, isoform	18	3	3	97.024	862	3.6	5.5	2634400	1048600
P48159;A8E792	60S ribosomal protein L23	RpL23;RpL17A	sp|P48159|RL23_DROME 60S ribosomal protein L23 OS=Drosophila melanogaster OX=7227 GN=RpL23 PE=1 SV=2;tr|A8E792|A8E792_DROME TA01212p OS=Drosophila melanogaster OX=7227 GN=RpL17A PE=2 SV=1	2	7	7	14.936	140	42.1	64.3	37981000	39089000
Q9VTU4	Eukaryotic translation initiation factor 3 subunit L	CG5642	sp|Q9VTU4|EIF3L_DROME Eukaryotic translation initiation factor 3 subunit L OS=Drosophila melanogaster OX=7227 GN=eIF3l PE=2 SV=1	1	10	10	63.223	539	16.5	25.2	8401400	8636300
Q9VBP9	Nuclear protein localization protein 4 homolog	Npl4	sp|Q9VBP9|NPL4_DROME Nuclear protein localization protein 4 homolog OS=Drosophila melanogaster OX=7227 GN=Npl4 PE=1 SV=3	1	2	2	73.36	652	3.8	5.8	82024	638150
M9PB68;Q9VLT5	Protein purity of essence	poe	tr|M9PB68|M9PB68_DROME Purity of essence, isoform B OS=Drosophila melanogaster OX=7227 GN=poe PE=4 SV=1;sp|Q9VLT5|POE_DROME Protein purity of essence OS=Drosophila melanogaster OX=7227 GN=poe PE=1 SV=1	2	10	10	590.7	5322	1.9	2.9	1712600	5495500
Q9VK44;Q8T3I1		CG9934	tr|Q9VK44|Q9VK44_DROME LD24832p OS=Drosophila melanogaster OX=7227 GN=ufd2 PE=1 SV=1;tr|Q8T3I1|Q8T3I1_DROME SD06937p OS=Drosophila melanogaster OX=7227 GN=CG9934 PE=2 SV=1	2	3	3	138.59	1217	1.9	2.9	936170	1230400
M9MRC9;P41092	60S ribosomal protein L27a	RpL27A	tr|M9MRC9|M9MRC9_DROME GEO07462p1 OS=Drosophila melanogaster OX=7227 GN=RpL27A PE=2 SV=1;sp|P41092|RL27A_DROME 60S ribosomal protein L27a OS=Drosophila melanogaster OX=7227 GN=RpL27A PE=1 SV=2	2	6	6	17.022	149	24.2	36.9	19426000	22686000
Q9VN86			tr|Q9VN86|Q9VN86_DROME AT14148p OS=Drosophila melanogaster OX=7227 GN=Sccpdh1 PE=1 SV=1	1	4	4	47.256	430	13.3	20.2	634550	2745400
A0A0B4LGQ1;Q00637	Superoxide dismutase;Superoxide dismutase [Mn], mitochondrial	Sod2	tr|A0A0B4LGQ1|A0A0B4LGQ1_DROME Superoxide dismutase OS=Drosophila melanogaster OX=7227 GN=Sod2 PE=3 SV=1;sp|Q00637|SODM_DROME Superoxide dismutase [Mn], mitochondrial OS=Drosophila melanogaster OX=7227 GN=Sod2 PE=2 SV=3	2	4	4	24.659	217	19.8	30	20636000	16772000
O97182		Arpc1	tr|O97182|O97182_DROME Actin-related protein 2/3 complex subunit OS=Drosophila melanogaster OX=7227 GN=Arpc1 PE=1 SV=1	1	6	6	41.601	377	15.6	23.6	12216000	6935300
Q9VL70;Q9NIU5		yip2	tr|Q9VL70|Q9VL70_DROME HL08109p OS=Drosophila melanogaster OX=7227 GN=yip2 PE=1 SV=1	2	12	12	41.61	398	35.4	53.5	5621500	9624600
Q9V9S8	Ferrochelatase, mitochondrial	FeCh	sp|Q9V9S8|HEMH_DROME Ferrochelatase, mitochondrial OS=Drosophila melanogaster OX=7227 GN=FeCh PE=2 SV=1	1	3	3	43.597	384	10.2	15.4	1206600	4087400
Q7KSW3;Q9VHZ5		sgll	tr|Q7KSW3|Q7KSW3_DROME Sugarlethal, isoform B OS=Drosophila melanogaster OX=7227 GN=sgll PE=1 SV=1;tr|Q9VHZ5|Q9VHZ5_DROME LP04163p OS=Drosophila melanogaster OX=7227 GN=sgll PE=1 SV=3	2	2	2	26.787	237	5.9	8.9	704640	0
Q9VLN1	WD repeat-containing protein 82	Wdr82	sp|Q9VLN1|WDR82_DROME WD repeat-containing protein 82 OS=Drosophila melanogaster OX=7227 GN=Wdr82 PE=1 SV=1	1	3	3	35.355	317	13.6	20.5	570500	1656700
Q9VCV4;Q9NFX3;O76934	Aconitate hydratase	Irp-1A	tr|Q9VCV4|Q9VCV4_DROME Iron regulatory protein 1A OS=Drosophila melanogaster OX=7227 GN=Irp-1A PE=1 SV=1;tr|Q9NFX3|Q9NFX3_DROME Iron regulatory protein 1A OS=Drosophila melanogaster OX=7227 GN=Irp-1A PE=2 SV=1;tr|O76934|O76934_DROME Iron regulatory protein	3	16	11	98.802	902	16.9	25.4	8646300	9573700
A1YK08;A1YK07;A1YK02;A1YK01;A1YK00;H1UUL1;A1YK11;A1YK03		Nup75;Nup75-RA	tr|A1YK08|A1YK08_DROME Nuclear pore complex protein Nup75 OS=Drosophila melanogaster OX=7227 GN=Nup75 PE=3 SV=1;tr|A1YK07|A1YK07_DROME Nuclear pore complex protein Nup75 OS=Drosophila melanogaster OX=7227 GN=Nup75 PE=3 SV=1;sp|A1YK02|NUP75_DROME Nuclear po	8	4	4	76.871	668	4.8	7.2	1040700	878370
U3PXB4;Q9VF87;B7FNQ8	Cytoplasmic FMR1-interacting protein	Sra-1-RA;Sra-1	tr|U3PXB4|U3PXB4_DROME FI23909p1 (Fragment) OS=Drosophila melanogaster OX=7227 GN=Sra-1-RA PE=2 SV=1;sp|Q9VF87|CYFIP_DROME Cytoplasmic FMR1-interacting protein OS=Drosophila melanogaster OX=7227 GN=Sra-1 PE=1 SV=1	3	4	4	151.92	1314	1.8	2.7	212720	747670
Q9XYZ5	DNA damage-binding protein 1	pic	sp|Q9XYZ5|DDB1_DROME DNA damage-binding protein 1 OS=Drosophila melanogaster OX=7227 GN=pic PE=1 SV=1	1	14	14	126.04	1140	10.8	16.2	14320000	13838000
A1Z713		Vps13	sp|A1Z713|VPS13_DROME Vacuolar protein sorting-associated protein 13 OS=Drosophila melanogaster OX=7227 GN=Vps13 PE=1 SV=2	1	2	2	374.54	3321	0.4	0.6	7563200	4929700
Q95R81;Q9VRV1;M9PEH8;M9PEB1		CG10289	tr|Q95R81|Q95R81_DROME SD02803p OS=Drosophila melanogaster OX=7227 GN=fmt PE=2 SV=1;tr|Q9VRV1|Q9VRV1_DROME Uncharacterized protein, isoform A OS=Drosophila melanogaster OX=7227 GN=fmt PE=1 SV=2;tr|M9PEH8|M9PEH8_DROME Uncharacterized protein, isoform D OS=D	4	2	2	110.83	987	1.5	2.2	0	303200
Q4QPQ7;Q9V3W2		BG:DS09217.1;ND-B17	tr|Q4QPQ7|Q4QPQ7_DROME HL02152p OS=Drosophila melanogaster OX=7227 GN=BG:DS09217.1 PE=2 SV=1;tr|Q9V3W2|Q9V3W2_DROME GM23292p OS=Drosophila melanogaster OX=7227 GN=ND-B17 PE=1 SV=1	2	2	2	16.037	138	6.5	9.4	0	560060
A1Z8S6;Q95U25		pds5	tr|A1Z8S6|A1Z8S6_DROME Precocious dissociation of sisters 5, isoform A OS=Drosophila melanogaster OX=7227 GN=pds5 PE=1 SV=1;tr|Q95U25|Q95U25_DROME GH12788p OS=Drosophila melanogaster OX=7227 GN=pds5 PE=2 SV=1	2	2	2	138.89	1218	0.9	1.2	0	30626
M9NDM4;Q9V3J8	Protein will die slowly	wds	tr|M9NDM4|M9NDM4_DROME Will die slowly, isoform B OS=Drosophila melanogaster OX=7227 GN=wds PE=4 SV=1;sp|Q9V3J8|WDS_DROME Protein will die slowly OS=Drosophila melanogaster OX=7227 GN=wds PE=1 SV=1	2	2	2	39.041	361	3.3	3.9	0	546010
Q7K4B4		dgt5	sp|Q7K4B4|DGT5_DROME Augmin complex subunit dgt5 OS=Drosophila melanogaster OX=7227 GN=dgt5 PE=1 SV=1	1	2	2	77.977	685	1.3	1.5	0	315520
Q960V6;Q7K9H6		Sara	tr|Q960V6|Q960V6_DROME Zinc finger FYVE domain-containing protein OS=Drosophila melanogaster OX=7227 GN=Sara PE=2 SV=1;tr|Q7K9H6|Q7K9H6_DROME Zinc finger FYVE domain-containing protein OS=Drosophila melanogaster OX=7227 GN=Sara PE=1 SV=1	2	4	4	146.26	1343	2	2.3	0	444550
Q4ABE3;Q4ABD8;Q4AB94;Q4AB54;P02255	Histone H1	His1:CG33801;His1:CG33807;His1:CG33834;His1:CG33861;His1	tr|Q4ABE3|Q4ABE3_DROME Histone H1 OS=Drosophila melanogaster OX=7227 GN=His1:CG33801 PE=3 SV=1;tr|Q4ABD8|Q4ABD8_DROME Histone H1 OS=Drosophila melanogaster OX=7227 GN=His1:CG33807 PE=3 SV=1;tr|Q4AB94|Q4AB94_DROME Histone H1 OS=Drosophila melanogaster OX=72	5	2	2	26.34	256	8.2	8.6	0	945750
Q9VZE2			tr|Q9VZE2|Q9VZE2_DROME GEO04055p1 OS=Drosophila melanogaster OX=7227 GN=Dmel\CG15012 PE=1 SV=2	1	1	1	16.937	152	10.5	10.5	0	1811600
Q9VDL0		Srp14	tr|Q9VDL0|Q9VDL0_DROME Signal recognition particle protein 14 OS=Drosophila melanogaster OX=7227 GN=Srp14 PE=1 SV=2	1	1	1	12.418	109	10.1	10.1	0	1765200
Q9VPP7			tr|Q9VPP7|Q9VPP7_DROME AT13539p OS=Drosophila melanogaster OX=7227 GN=Dmel\CG11885 PE=1 SV=1	1	1	1	15.874	141	6.4	6.4	0	349220
Q08012	Protein enhancer of sevenless 2B	drk	sp|Q08012|DRK_DROME Protein enhancer of sevenless 2B OS=Drosophila melanogaster OX=7227 GN=drk PE=1 SV=1	1	2	2	24.435	211	6.2	6.2	0	341350
C1C542;A1ZAW5	Methylosome subunit pICln	icln-RA;icln	tr|C1C542|C1C542_DROME FI06489p (Fragment) OS=Drosophila melanogaster OX=7227 GN=icln-RA PE=2 SV=1;sp|A1ZAW5|ICLN_DROME Methylosome subunit pICln OS=Drosophila melanogaster OX=7227 GN=icln PE=1 SV=1	2	1	1	25.378	230	5.2	5.2	0	523590
Q8T4C9			tr|Q8T4C9|Q8T4C9_DROME AT03632p OS=Drosophila melanogaster OX=7227 GN=Dmel\CG6310 PE=1 SV=1	1	1	1	22.413	193	5.2	5.2	0	391000
Q1WWE7;M9PJI4;E1JJH6;M9NGZ2;E8NH13;M9PHK8;E1JJH5;P31007	Disks large 1 tumor suppressor protein	CG1725-RB;dlg1	tr|Q1WWE7|Q1WWE7_DROME IP15321p (Fragment) OS=Drosophila melanogaster OX=7227 GN=CG1725-RB PE=2 SV=1;tr|M9PJI4|M9PJI4_DROME Discs large 1, isoform T OS=Drosophila melanogaster OX=7227 GN=dlg1 PE=1 SV=1;tr|E1JJH6|E1JJH6_DROME Discs large 1, isoform N OS=Dro	8	1	1	45.183	411	3.6	3.6	0	831050
Q9VBH7			tr|Q9VBH7|Q9VBH7_DROME tRNA (adenine(58)-N(1))-methyltransferase catalytic subunit TRMT61A OS=Drosophila melanogaster OX=7227 GN=Dmel\CG14544 PE=1 SV=1	1	1	1	35.1	317	3.5	3.5	0	328120
Q86PD3		CG30022;CG30023	tr|Q86PD3|Q86PD3_DROME RE56416p OS=Drosophila melanogaster OX=7227 GN=CG30022;CG30023 PE=1 SV=1	1	1	1	31.401	279	3.2	3.2	0	434710
O76928		cm	tr|O76928|O76928_DROME Carmine, isoform A OS=Drosophila melanogaster OX=7227 GN=cm PE=1 SV=1	1	1	1	46.795	415	2.9	2.9	0	205170
Q961A5;Q9V3A7;Q9U6I2	Structural maintenance of chromosomes protein	glu	tr|Q961A5|Q961A5_DROME LD25919p OS=Drosophila melanogaster OX=7227 GN=glu PE=2 SV=1;tr|Q9V3A7|Q9V3A7_DROME Structural maintenance of chromosomes protein OS=Drosophila melanogaster OX=7227 GN=glu PE=1 SV=1;tr|Q9U6I2|Q9U6I2_DROME Structural maintenance of ch	3	1	1	62.055	550	2.9	2.9	0	440370
X2JBJ9;Q9VYG1	26S proteasome non-ATPase regulatory subunit 5	CG12096	tr|X2JBJ9|X2JBJ9_DROME Uncharacterized protein, isoform B OS=Drosophila melanogaster OX=7227 GN=Dmel\CG12096 PE=1 SV=1;sp|Q9VYG1|PSMD5_DROME 26S proteasome non-ATPase regulatory subunit 5 OS=Drosophila melanogaster OX=7227 GN=CG12096 PE=1 SV=3	2	1	1	56.667	506	2.4	2.4	0	586970
M9PBV6;Q9Y109		BcDNA.GH11023	tr|M9PBV6|M9PBV6_DROME Uncharacterized protein, isoform B OS=Drosophila melanogaster OX=7227 GN=Nulp1 PE=4 SV=1;tr|Q9Y109|Q9Y109_DROME BcDNA.GH11023 OS=Drosophila melanogaster OX=7227 GN=Nulp1 PE=2 SV=1	2	2	2	73.408	653	2	2	0	379510
Q9VKU1;E1JHE4		Fatp	tr|Q9VKU1|Q9VKU1_DROME Fatty acid (Long chain) transport protein, isoform A OS=Drosophila melanogaster OX=7227 GN=Fatp1 PE=1 SV=2;tr|E1JHE4|E1JHE4_DROME Fatty acid (Long chain) transport protein, isoform F OS=Drosophila melanogaster OX=7227 GN=Fatp1 PE=1 S	2	1	1	70.162	626	1.8	1.8	0	498800
X2JD07;H0RNM5;Q9W3C1	Polycomb protein l(1)G0020	l(1)G0020;l(1)G0020-RA	tr|X2JD07|X2JD07_DROME RNA cytidine acetyltransferase OS=Drosophila melanogaster OX=7227 GN=l(1)G0020 PE=1 SV=1;tr|H0RNM5|H0RNM5_DROME RNA cytidine acetyltransferase OS=Drosophila melanogaster OX=7227 GN=l(1)G0020-RA PE=2 SV=1;sp|Q9W3C1|NAT10_DROME RNA cyt	3	1	1	108.4	967	1.2	1.2	0	244670
M9PD06	Ubiquitin carboxyl-terminal hydrolase	Usp32	sp|M9PD06|UBP32_DROME Ubiquitin carboxyl-terminal hydrolase 32 OS=Drosophila melanogaster OX=7227 GN=Usp32 PE=3 SV=1	1	1	1	191.84	1715	0.8	0.8	0	95901
X2JC94;O46084	Serine/threonine-protein phosphatase Pgam5, mitochondrial	Pgam5	tr|X2JC94|X2JC94_DROME Phosphoglycerate mutase 5, isoform B OS=Drosophila melanogaster OX=7227 GN=Pgam5 PE=4 SV=1;sp|O46084|PGAM5_DROME Serine/threonine-protein phosphatase Pgam5, mitochondrial OS=Drosophila melanogaster OX=7227 GN=Pgam5 PE=1 SV=1	2	2	2	33.037	288	6.6	5.6	0	1075900
Q9W299;Q86NX6		CG11474	tr|Q9W299|Q9W299_DROME LD03212p OS=Drosophila melanogaster OX=7227 GN=Dmel\CG11474 PE=1 SV=1;tr|Q86NX6|Q86NX6_DROME LD08055p (Fragment) OS=Drosophila melanogaster OX=7227 GN=CG11474 PE=2 SV=1	2	2	2	49.41	436	4.1	3.2	0	209960
Q9W3T2;Q8SYD7		CG4593-RA;CG4593	tr|Q9W3T2|Q9W3T2_DROME CG4593-PA OS=Drosophila melanogaster OX=7227 GN=Dmel\CG4593 PE=1 SV=1;tr|Q8SYD7|Q8SYD7_DROME RE66240p OS=Drosophila melanogaster OX=7227 GN=CG4593 PE=2 SV=1	2	2	2	24.789	209	9.6	7.2	0	159350
Q9W086		mRpL46	tr|Q9W086|Q9W086_DROME Mitochondrial ribosomal protein L46 OS=Drosophila melanogaster OX=7227 GN=mRpL46 PE=1 SV=1	1	2	2	29.703	258	8.1	5	0	403930
Q9VL96	Pescadillo homolog	CG4364	sp|Q9VL96|PESC_DROME Pescadillo homolog OS=Drosophila melanogaster OX=7227 GN=CG4364 PE=1 SV=1	1	3	3	73.862	627	2.6	1.6	0	212920
P17886	Protein crooked neck	crn	sp|P17886|CRN_DROME Protein crooked neck OS=Drosophila melanogaster OX=7227 GN=crn PE=2 SV=2	1	2	2	84.261	702	2	1.1	0	271020
Q9VZW1;Q8SZE1		scramb2	tr|Q9VZW1|Q9VZW1_DROME Phospholipid scramblase OS=Drosophila melanogaster OX=7227 GN=scramb2 PE=1 SV=1;tr|Q8SZE1|Q8SZE1_DROME Phospholipid scramblase OS=Drosophila melanogaster OX=7227 GN=scramb2 PE=2 SV=1	2	2	2	29.58	263	8	3.8	0	376340
A0A088BCF8;J9TIE4;J9THZ9;C6KI54;A0A0A0RZ60;A0A126QBH8;A0A126QBG4;C8CB16;P00408	Cytochrome c oxidase subunit 2	COII;COX2;mt:CoII	tr|A0A088BCF8|A0A088BCF8_DROME Cytochrome c oxidase subunit 2 (Fragment) OS=Drosophila melanogaster OX=7227 GN=COII PE=3 SV=1;tr|J9TIE4|J9TIE4_DROME Cytochrome c oxidase subunit 2 OS=Drosophila melanogaster OX=7227 GN=COX2 PE=3 SV=1;tr|J9THZ9|J9THZ9_DROME	9	3	3	24.017	208	11.5	3.4	0	1431800
Q8MR94;Q5U0V7		Synj	tr|Q8MR94|Q8MR94_DROME SD04710p (Fragment) OS=Drosophila melanogaster OX=7227 GN=Synj PE=2 SV=1;tr|Q5U0V7|Q5U0V7_DROME GH06496p OS=Drosophila melanogaster OX=7227 GN=Synj PE=1 SV=1	2	1	1	105.69	959	0.9	0.9	661130	37288000
Q9VTB4		ND-13B	tr|Q9VTB4|Q9VTB4_DROME NADH dehydrogenase (Ubiquinone) 13 kDa B subunit OS=Drosophila melanogaster OX=7227 GN=ND-13B PE=1 SV=2	1	1	1	13.788	124	17.7	17.7	61977	2024700
Q9VCD9			tr|Q9VCD9|Q9VCD9_DROME Uncharacterized protein, isoform C OS=Drosophila melanogaster OX=7227 GN=Dmel\CG6000 PE=1 SV=3	1	2	2	17.4	154	31.2	22.1	33206	553830
B5RIU6;Q8T390	Endophilin-A	EndoA;endoA	tr|B5RIU6|B5RIU6_DROME AT06279p OS=Drosophila melanogaster OX=7227 GN=EndoA PE=1 SV=1;sp|Q8T390|SH3G3_DROME Endophilin-A OS=Drosophila melanogaster OX=7227 GN=EndoA PE=1 SV=1	2	1	1	41.408	369	5.7	5.7	9681.4	149310
Q9VAR0			tr|Q9VAR0|Q9VAR0_DROME LD39455p OS=Drosophila melanogaster OX=7227 GN=Dmel\CG1951 PE=1 SV=1	1	1	1	93.456	835	2.8	2.8	9680	102790
Q8T4A9		Rrp45	tr|Q8T4A9|Q8T4A9_DROME AT07738p OS=Drosophila melanogaster OX=7227 GN=Rrp45 PE=1 SV=1	1	1	1	46.303	412	4.9	4.9	386400	4064800
A0A0B4LHF7;Q9VD51	Probable ATP-dependent RNA helicase pitchoune	pit	tr|A0A0B4LHF7|A0A0B4LHF7_DROME Pitchoune, isoform C OS=Drosophila melanogaster OX=7227 GN=pit PE=3 SV=1;sp|Q9VD51|DDX18_DROME Probable ATP-dependent RNA helicase pitchoune OS=Drosophila melanogaster OX=7227 GN=pit PE=2 SV=2	2	1	1	76.927	680	2.1	2.1	18759	193620
B7Z0I8			tr|B7Z0I8|B7Z0I8_DROME Uncharacterized protein OS=Drosophila melanogaster OX=7227 GN=CG14896 PE=1 SV=1	1	1	1	378.59	3441	0.6	0.6	14051	142510
A0A1B3Q3M2;M9PBM4;Q9VZL6	Ragulator complex protein LAMTOR4 homolog	CG14977	tr|A0A1B3Q3M2|A0A1B3Q3M2_DROME GEO12664p1 (Fragment) OS=Drosophila melanogaster OX=7227 PE=2 SV=1;tr|M9PBM4|M9PBM4_DROME Uncharacterized protein, isoform B OS=Drosophila melanogaster OX=7227 GN=Dmel\CG14977 PE=4 SV=1;sp|Q9VZL6|LTOR4_DROME Ragulator complex	3	1	1	13.262	120	21.7	21.7	65858	662430
Q9V773	Probable cytochrome P450 6a20	Cyp6a20	sp|Q9V773|C6A20_DROME Probable cytochrome P450 6a20 OS=Drosophila melanogaster OX=7227 GN=Cyp6a20 PE=2 SV=2	1	1	1	57.728	501	3	3	29841	298770
Q9VNZ3		Rpb8	tr|Q9VNZ3|Q9VNZ3_DROME DNA-directed RNA polymerases I, II, and III subunit RPABC3 OS=Drosophila melanogaster OX=7227 GN=Rpb8 PE=1 SV=1	1	2	2	17.203	149	12.8	12.8	1419300	13093000
Q95RN0	UPF0528 protein CG10038	CG10038	sp|Q95RN0|F172A_DROME FAM172 family protein homolog CG10038 OS=Drosophila melanogaster OX=7227 GN=CG10038 PE=2 SV=1	1	2	2	36.561	325	8.6	4.6	122600	1130800
Q9VS38	Mediator of RNA polymerase II transcription subunit 4	MED4	sp|Q9VS38|MED4_DROME Mediator of RNA polymerase II transcription subunit 4 OS=Drosophila melanogaster OX=7227 GN=MED4 PE=1 SV=1	1	1	1	28.312	258	8.5	8.5	7865.3	69972
Q9V3H0;Q9NDR2		Drep4	tr|Q9V3H0|Q9V3H0_DROME DNAation factor-related protein 4 OS=Drosophila melanogaster OX=7227 GN=Drep4 PE=1 SV=1;tr|Q9NDR2|Q9NDR2_DROME Caspase-activated DNase OS=Drosophila melanogaster OX=7227 GN=Drep4 PE=2 SV=1	2	1	1	52.016	450	4.4	4.4	21985	192980
Q9GNC8;Q0KI94;Q6AWM9		ps	tr|Q9GNC8|Q9GNC8_DROME PASILLA splice variant 1 OS=Drosophila melanogaster OX=7227 GN=ps PE=1 SV=1;tr|Q0KI94|Q0KI94_DROME Pasilla, isoform I OS=Drosophila melanogaster OX=7227 GN=ps PE=1 SV=1;tr|Q6AWM9|Q6AWM9_DROME RE39088p (Fragment) OS=Drosophila melanog	3	6	1	49.32	475	17.9	18.7	34704	300030
O18338;M9NEE8;D5AEN5		Rab8;Rab8-RA	tr|O18338|O18338_DROME LD44762p OS=Drosophila melanogaster OX=7227 GN=Rab8 PE=1 SV=1;tr|M9NEE8|M9NEE8_DROME Rab8, isoform B OS=Drosophila melanogaster OX=7227 GN=Rab8 PE=1 SV=1;tr|D5AEN5|D5AEN5_DROME MIP21873p (Fragment) OS=Drosophila melanogaster OX=7227	3	2	1	23.691	207	13.5	13.5	150340	1246400
A0A0B4KG83;Q9VEC3	Actin-related protein 5	Arp5	tr|A0A0B4KG83|A0A0B4KG83_DROME Actin-related protein 5, isoform B OS=Drosophila melanogaster OX=7227 GN=Arp5 PE=3 SV=1;sp|Q9VEC3|ARP5_DROME Actin-related protein 5 OS=Drosophila melanogaster OX=7227 GN=Arp5 PE=1 SV=1	2	1	1	75.121	648	3.5	3.5	9657.1	79040
Q9VBI4;Q7KRZ3;H1UUJ5		Exo84;exo84-RA	tr|Q9VBI4|Q9VBI4_DROME Exocyst 84, isoform A OS=Drosophila melanogaster OX=7227 GN=Exo84 PE=1 SV=1;tr|Q7KRZ3|Q7KRZ3_DROME Exocyst 84, isoform B OS=Drosophila melanogaster OX=7227 GN=Exo84 PE=1 SV=1;tr|H1UUJ5|H1UUJ5_DROME FI18238p1 (Fragment) OS=Drosophila	3	1	1	76.53	671	2.1	2.1	32226	261590
Q9VHA8		P58IPK	tr|Q9VHA8|Q9VHA8_DROME LD25575p OS=Drosophila melanogaster OX=7227 GN=P58IPK PE=1 SV=1	1	5	5	56.823	498	15.5	19.5	457290	3634100
Q9VI70			tr|Q9VI70|Q9VI70_DROME GPN-loop GTPase 3 OS=Drosophila melanogaster OX=7227 GN=Dmel\CG2656 PE=1 SV=2	1	1	1	31.862	283	5.7	5.7	12907	98734
M9PG81;M9PGM0;O76878	RILP-like protein homolog	CG11448	tr|M9PG81|M9PG81_DROME Uncharacterized protein, isoform B OS=Drosophila melanogaster OX=7227 GN=EG:132E8.4 PE=4 SV=1;tr|M9PGM0|M9PGM0_DROME Uncharacterized protein, isoform C OS=Drosophila melanogaster OX=7227 GN=Dmel\CG11448 PE=4 SV=1;sp|O76878|RIPL_DROME	3	1	1	50.721	448	3.1	3.1	18139	137630
X2J9A4;C6SV41;Q9VL50;Q9VL49;Q24559;D4G7B2		Trp1	tr|X2J9A4|X2J9A4_DROME Translocation protein 1, isoform D OS=Drosophila melanogaster OX=7227 GN=Trp1 PE=1 SV=1;tr|C6SV41|C6SV41_DROME AT13927p OS=Drosophila melanogaster OX=7227 GN=Trp1 PE=1 SV=1;tr|Q9VL50|Q9VL50_DROME RE23984p OS=Drosophila melanogaster O	6	5	5	43.95	385	12.5	9.4	667840	5041900
O44434;Q95TJ8		qkr58E-3	tr|O44434|O44434_DROME QKR58E-3 OS=Drosophila melanogaster OX=7227 GN=qkr58E-3 PE=1 SV=1;tr|Q95TJ8|Q95TJ8_DROME LD46502p OS=Drosophila melanogaster OX=7227 GN=qkr58E-3 PE=2 SV=1	2	1	1	36.683	317	5.7	5.7	85494	633960
D8FT09;Q9W592;Q5BIM0;V5P006;C3KGM3		CG14786-RA;Lrpprc2	tr|D8FT09|D8FT09_DROME LD01992p (Fragment) OS=Drosophila melanogaster OX=7227 GN=CG14786-RA PE=2 SV=1;tr|Q9W592|Q9W592_DROME EG:BACN32G11.3 protein OS=Drosophila melanogaster OX=7227 GN=Lrpprc2 PE=1 SV=1;tr|Q5BIM0|Q5BIM0_DROME UT01249p OS=Drosophila melano	5	1	1	85.613	764	1.6	1.6	43455	321570
Q9VW70;Q8SYR0;Q8T3M7		CG7668-RA;CG7668	tr|Q9VW70|Q9VW70_DROME FI21813p1 OS=Drosophila melanogaster OX=7227 GN=BcDNA:GM07843 PE=1 SV=2;tr|Q8SYR0|Q8SYR0_DROME RE40293p OS=Drosophila melanogaster OX=7227 GN=CG7668 PE=2 SV=1;tr|Q8T3M7|Q8T3M7_DROME GM07843p OS=Drosophila melanogaster OX=7227 GN=CG76	3	2	2	47.993	422	9	5.2	52749	384690
Q8IQV5;M9NG75;M9NFL3;Q8IQV6;M9NEF4;M9NDW6;Q9VWA0			tr|Q8IQV5|Q8IQV5_DROME LD13191p OS=Drosophila melanogaster OX=7227 GN=CG6918 PE=1 SV=2;tr|M9NG75|M9NG75_DROME Uncharacterized protein, isoform H OS=Drosophila melanogaster OX=7227 GN=CG6918 PE=1 SV=1;tr|M9NFL3|M9NFL3_DROME Uncharacterized protein, isoform	7	1	1	83.51	772	2.7	2.7	18746	135660
A0A0B4LHX1;O76206	Putative riboflavin kinase	anon-84Ea	tr|A0A0B4LHX1|A0A0B4LHX1_DROME GEO08148p1 OS=Drosophila melanogaster OX=7227 GN=C PE=2 SV=1;sp|O76206|RIFK_DROME Putative riboflavin kinase OS=Drosophila melanogaster OX=7227 GN=anon-84Ea PE=2 SV=1	2	3	3	16.985	153	28.1	28.1	267190	1908000
M9PCM4;P29052	Transcription initiation factor IIB	TfIIB	tr|M9PCM4|M9PCM4_DROME Transcription factor IIB, isoform B OS=Drosophila melanogaster OX=7227 GN=TfIIB PE=4 SV=1;sp|P29052|TF2B_DROME Transcription initiation factor IIB OS=Drosophila melanogaster OX=7227 GN=TfIIB PE=2 SV=1	2	1	1	34.369	315	6.3	6.3	49935	355980
Q9VDD8;Q8MQX4;D0IQK1	Ubiquitin carboxyl-terminal hydrolase	Usp8;CG5798-RA	tr|Q9VDD8|Q9VDD8_DROME FI20021p1 OS=Drosophila melanogaster OX=7227 GN=Usp8 PE=1 SV=2;tr|Q8MQX4|Q8MQX4_DROME SD04548p OS=Drosophila melanogaster OX=7227 GN=Usp8 PE=2 SV=1;tr|D0IQK1|D0IQK1_DROME RH33842p OS=Drosophila melanogaster OX=7227 GN=CG5798-RA PE=2	3	3	3	102.67	896	7.7	7.7	85815	606540
Q7YZA2	Uncharacterized protein CG7065	CG7065	sp|Q7YZA2|Y7065_DROME Uncharacterized protein CG7065 OS=Drosophila melanogaster OX=7227 GN=CG7065 PE=1 SV=1	1	1	1	136.77	1231	2.4	2.4	18323	129440
I1V4Y0;I1V4X9;P50536	Protein male-specific lethal-3	msl-3	tr|I1V4Y0|I1V4Y0_DROME Male-specific lethal 3 OS=Drosophila melanogaster OX=7227 GN=msl-3 PE=4 SV=1;tr|I1V4X9|I1V4X9_DROME Male-specific lethal 3 OS=Drosophila melanogaster OX=7227 GN=msl-3 PE=4 SV=1;sp|P50536|MSL3_DROME Protein male-specific lethal-3 OS=D	3	1	1	53.673	481	2.5	2.5	14027	98958
A0A0B4KI38;Q9V9X4	Methylthioribose-1-phosphate isomerase	CG11334	tr|A0A0B4KI38|A0A0B4KI38_DROME Methylthioribose-1-phosphate isomerase OS=Drosophila melanogaster OX=7227 GN=Dmel\CG11334 PE=3 SV=1;sp|Q9V9X4|MTNA_DROME Methylthioribose-1-phosphate isomerase OS=Drosophila melanogaster OX=7227 GN=CG11334 PE=2 SV=1	2	3	3	39.108	364	11.3	14.3	340170	2388400
E1JGZ3;Q494K3;Q960H5;A1Z6Z7;D2NUG7		CG1620;CG1620-RA	tr|E1JGZ3|E1JGZ3_DROME Uncharacterized protein, isoform B OS=Drosophila melanogaster OX=7227 GN=Dmel\CG1620 PE=1 SV=1;tr|Q494K3|Q494K3_DROME LD42725p (Fragment) OS=Drosophila melanogaster OX=7227 PE=2 SV=1;tr|Q960H5|Q960H5_DROME LP08674p OS=Drosophila mela	5	2	2	50.425	457	11.6	6.1	81643	567970
Q9VZL5		Ccz1	tr|Q9VZL5|Q9VZL5_DROME Caffeine, calcium, zinc sensitivity 1 OS=Drosophila melanogaster OX=7227 GN=Ccz1 PE=2 SV=3	1	1	1	55.522	485	3.1	3.1	21037	140760
A0A0B4K7L0;D0Z764;Q9W252	DNA repair protein RAD50	rad50;rad50-RB	tr|A0A0B4K7L0|A0A0B4K7L0_DROME Rad50, isoform E OS=Drosophila melanogaster OX=7227 GN=rad50 PE=1 SV=1;tr|D0Z764|D0Z764_DROME FI13085p (Fragment) OS=Drosophila melanogaster OX=7227 GN=rad50-RB PE=2 SV=1;sp|Q9W252|RAD50_DROME DNA repair protein RAD50 OS=Dros	3	1	1	152.13	1318	1.2	1.2	31803	212330
A0A0B4K603;A0A0B4K6V2;A0A0B4KF90;A0A0B4K631;A0A0B4KGC6;C1C3H4;B7Z0U7;A0A0B4KFE2;E1JJ78;Q9VI75	Phosphatidylinositol-binding clathrin assembly protein LAP	lap;lap-RB	tr|A0A0B4K603|A0A0B4K603_DROME Like-AP180, isoform E OS=Drosophila melanogaster OX=7227 GN=lap PE=1 SV=1;tr|A0A0B4K6V2|A0A0B4K6V2_DROME Like-AP180, isoform G OS=Drosophila melanogaster OX=7227 GN=lap PE=1 SV=1;tr|A0A0B4KF90|A0A0B4KF90_DROME Like-AP180, iso	10	1	1	61.702	572	3.3	3.3	68531	454780
Q7KMI7;A1Z6G6;A9UNG7		BcDNA.LD22679	tr|Q7KMI7|Q7KMI7_DROME BcDNA.LD22679 OS=Drosophila melanogaster OX=7227 GN=BcDNA.LD22679 PE=2 SV=1;tr|A1Z6G6|A1Z6G6_DROME Uncharacterized protein, isoform A OS=Drosophila melanogaster OX=7227 GN=BcDNA:LD22679 PE=1 SV=1;tr|A9UNG7|A9UNG7_DROME LD46837p (Frag	3	1	1	73.135	641	2.8	2.8	30139	198910
Q9VSK9			tr|Q9VSK9|Q9VSK9_DROME GH24787p OS=Drosophila melanogaster OX=7227 GN=Dmel\CG6745 PE=1 SV=1	1	1	1	82.799	734	2.6	2.6	13974	91175
Q9VPR3;Q8MYS6		CG2794	tr|Q9VPR3|Q9VPR3_DROME Uncharacterized protein OS=Drosophila melanogaster OX=7227 GN=Dmel\CG2794 PE=1 SV=1;tr|Q8MYS6|Q8MYS6_DROME RH71315p OS=Drosophila melanogaster OX=7227 GN=CG2794 PE=2 SV=1	2	1	1	76.47	700	1.7	1.7	55294	355480
E8NH76;Q9VUC6;I0B8L8;Q5U0S9	Formin-like protein CG32138	CG32138-RC;CG32138	tr|E8NH76|E8NH76_DROME LP24417p OS=Drosophila melanogaster OX=7227 GN=CG32138-RC PE=2 SV=1;sp|Q9VUC6|FRL_DROME Formin-like protein OS=Drosophila melanogaster OX=7227 GN=Frl PE=1 SV=3;tr|I0B8L8|I0B8L8_DROME MIP35420p1 (Fragment) OS=Drosophila melanogaster O	4	3	3	68.018	609	9.2	9.2	142860	914540
Q9VMC6			tr|Q9VMC6|Q9VMC6_DROME GH06693p OS=Drosophila melanogaster OX=7227 GN=Dmel\CG9547 PE=1 SV=1	1	2	2	45.756	419	7.4	5	178860	1110100
Q7K1C5			tr|Q7K1C5|Q7K1C5_DROME GH21176p OS=Drosophila melanogaster OX=7227 GN=Hyccin PE=1 SV=1	1	1	1	59.918	544	2.4	2.4	21861	134080
Q9VQ60			tr|Q9VQ60|Q9VQ60_DROME LD12115p OS=Drosophila melanogaster OX=7227 GN=Dmel\CG7289 PE=2 SV=2	1	1	1	72.434	637	1.9	1.9	15613	95681
Q9VRQ1;M9PHI7			tr|Q9VRQ1|Q9VRQ1_DROME Krishah, isoform A OS=Drosophila melanogaster OX=7227 GN=kri PE=1 SV=1;tr|M9PHI7|M9PHI7_DROME Krishah, isoform B OS=Drosophila melanogaster OX=7227 GN=kri PE=1 SV=1	2	1	1	28.776	261	6.1	6.1	45978	279480
Q7K130			tr|Q7K130|Q7K130_DROME Dynactin 4, p62 subunit OS=Drosophila melanogaster OX=7227 GN=DCTN4-p62 PE=1 SV=1	1	1	1	57.925	514	5.3	5.3	33346	192850
Q9VUZ8		PDCD-5	tr|Q9VUZ8|Q9VUZ8_DROME GEO07442p1 OS=Drosophila melanogaster OX=7227 GN=PDCD-5 PE=1 SV=1	1	2	2	15.091	133	15.8	23.3	123360	712380
Q9VQR9		CG17593-RA	tr|Q9VQR9|Q9VQR9_DROME FI04424p OS=Drosophila melanogaster OX=7227 GN=Dmel\CG17593 PE=1 SV=1	1	1	1	54.153	476	5	5	57292	327240
A1ZB72;Q8MR33		GstE7	tr|A1ZB72|A1ZB72_DROME Glutathione S transferase E7 OS=Drosophila melanogaster OX=7227 GN=GstE7 PE=1 SV=1;tr|Q8MR33|Q8MR33_DROME LD04004p (Fragment) OS=Drosophila melanogaster OX=7227 GN=GstE7 PE=2 SV=1	2	3	3	25.51	223	19.7	19.7	502040	2844300
Q9W0C7	Protein OPI10 homolog	CG13926	sp|Q9W0C7|OPI10_DROME Protein OPI10 homolog OS=Drosophila melanogaster OX=7227 GN=CG13926 PE=3 SV=1	1	1	1	21.86	197	5.1	5.1	8487	47978
Q7K1S9;Q9VX99;C6SV49		Rcp;CG4875-RB	tr|Q7K1S9|Q7K1S9_DROME LD45115p OS=Drosophila melanogaster OX=7227 GN=Rcp PE=2 SV=1;tr|Q9VX99|Q9VX99_DROME Receptor component protein, isoform B OS=Drosophila melanogaster OX=7227 GN=Rcp PE=4 SV=2;tr|C6SV49|C6SV49_DROME RE34232p (Fragment) OS=Drosophila me	3	1	1	23.789	222	8.6	8.6	24838	138740
C7LAD8;A0A0B4LFW6;A1Z7S0		Rme-8-RA;Rme-8	tr|C7LAD8|C7LAD8_DROME LD15569p (Fragment) OS=Drosophila melanogaster OX=7227 GN=Rme-8-RA PE=2 SV=1;tr|A0A0B4LFW6|A0A0B4LFW6_DROME Receptor mediated endocytosis 8, isoform B OS=Drosophila melanogaster OX=7227 GN=Rme-8 PE=1 SV=1;tr|A1Z7S0|A1Z7S0_DROME Recep	3	1	1	199.22	1747	1.3	1.3	22666	126160
Q9VUN8			tr|Q9VUN8|Q9VUN8_DROME Sugar transporter SWEET OS=Drosophila melanogaster OX=7227 GN=Dmel\CG7272 PE=1 SV=1	1	1	1	25.028	228	7.5	7.5	338220	1875200
Q9VTZ7			tr|Q9VTZ7|Q9VTZ7_DROME LD47970p OS=Drosophila melanogaster OX=7227 GN=Dmel\CG4069 PE=1 SV=1	1	1	1	56.351	509	3.1	3.1	179380	987270
Q9VS02;Q8SZM1		CG9953	tr|Q9VS02|Q9VS02_DROME Uncharacterized protein OS=Drosophila melanogaster OX=7227 GN=Dmel\CG9953 PE=1 SV=1;tr|Q8SZM1|Q8SZM1_DROME RH04336p OS=Drosophila melanogaster OX=7227 GN=CG9953 PE=2 SV=1	2	2	2	56.861	508	8.3	8.3	350780	1899500
Q9VKV5	CD2 antigen cytoplasmic tail-binding protein 2 homolog	holn1	sp|Q9VKV5|CD2B2_DROME CD2 antigen cytoplasmic tail-binding protein 2 homolog OS=Drosophila melanogaster OX=7227 GN=holn1 PE=1 SV=1	1	1	1	36.837	319	5.3	5.3	68781	371450
Q7KK29;Q9VEN9		Patr-1	tr|Q7KK29|Q7KK29_DROME BcDNA.LD27979 OS=Drosophila melanogaster OX=7227 GN=Patr-1 PE=2 SV=1;tr|Q9VEN9|Q9VEN9_DROME Protein associated with topo II related-1, isoform A OS=Drosophila melanogaster OX=7227 GN=Patr-1 PE=1 SV=1	2	2	2	102.82	919	4	4	119510	644740
Q8T3K1;Q9VB48		CG3368	tr|Q8T3K1|Q8T3K1_DROME SD09067p OS=Drosophila melanogaster OX=7227 GN=CG3368 PE=2 SV=1;tr|Q9VB48|Q9VB48_DROME Uncharacterized protein OS=Drosophila melanogaster OX=7227 GN=Dmel\CG3368 PE=1 SV=2	2	1	1	127	1118	1.3	1.3	21333	114860
Q9VDK6;E1JIR1;H1UUC7;C4XVI8	tRNA pseudouridine synthase	CG4159-RB;CG4159-RA	tr|Q9VDK6|Q9VDK6_DROME tRNA pseudouridine synthase OS=Drosophila melanogaster OX=7227 GN=Pus1 PE=3 SV=1;tr|E1JIR1|E1JIR1_DROME tRNA pseudouridine synthase OS=Drosophila melanogaster OX=7227 GN=Pus1 PE=3 SV=1;tr|H1UUC7|H1UUC7_DROME tRNA pseudouridine syntha	4	4	4	47.224	410	14.9	17.8	473530	2481200
Q9W0N6		Vti1	tr|Q9W0N6|Q9W0N6_DROME LD27967p OS=Drosophila melanogaster OX=7227 GN=Vti1a PE=2 SV=1	1	1	1	25.888	230	8.7	8.7	46514	242320
M9PDU3;M9PC12;C1C573;M9PBN1;Q9VPQ6	Zinc finger protein ush	ush;ush-RA	tr|M9PDU3|M9PDU3_DROME U-shaped, isoform D OS=Drosophila melanogaster OX=7227 GN=ush PE=1 SV=1;tr|M9PC12|M9PC12_DROME U-shaped, isoform B OS=Drosophila melanogaster OX=7227 GN=ush PE=1 SV=1;tr|C1C573|C1C573_DROME SD10668p OS=Drosophila melanogaster OX=7227	5	2	2	122.83	1175	2.5	1.5	107370	559210
Q95R61;A0A0B4LFQ2;Q7JRJ9;Q8IGP7		Incenp	tr|Q95R61|Q95R61_DROME SD04909p OS=Drosophila melanogaster OX=7227 GN=Incenp PE=2 SV=1;tr|A0A0B4LFQ2|A0A0B4LFQ2_DROME Inner centromere protein, isoform C OS=Drosophila melanogaster OX=7227 GN=Incenp PE=1 SV=1;tr|Q7JRJ9|Q7JRJ9_DROME Inner centromere protein	4	1	1	35.146	310	9.4	9.4	73251	381000
Q9VVA7;Q3YNA6;Q8MQZ0		TSG101	tr|Q9VVA7|Q9VVA7_DROME Tumor suppressor protein 101 OS=Drosophila melanogaster OX=7227 GN=TSG101 PE=1 SV=2	3	4	4	45.19	408	17.2	11	1158800	5950800
A8DYJ3;A0A0B4LG26;Q11002	Calpain-A;Calpain-A catalytic subunit	CalpA	tr|A8DYJ3|A8DYJ3_DROME Calpain-A, isoform C OS=Drosophila melanogaster OX=7227 GN=CalpA PE=1 SV=1;tr|A0A0B4LG26|A0A0B4LG26_DROME Calpain-A, isoform D OS=Drosophila melanogaster OX=7227 GN=CalpA PE=1 SV=1;sp|Q11002|CANA_DROME Calpain-A OS=Drosophila melanog	3	5	3	93.962	828	7.9	7.1	628740	3172700
Q9VB96;A9UNE9;A0A0B4K6I6			tr|Q9VB96|Q9VB96_DROME Uncharacterized protein, isoform A OS=Drosophila melanogaster OX=7227 GN=150697_at PE=1 SV=2;tr|A9UNE9|A9UNE9_DROME GH20910p (Fragment) OS=Drosophila melanogaster OX=7227 PE=2 SV=1;tr|A0A0B4K6I6|A0A0B4K6I6_DROME Uncharacterized prote	3	4	4	52.606	485	9.1	7.4	770000	3860600
Q95S35;Q9VB64;F2FB73		CG6001;CG42813-RA	tr|Q95S35|Q95S35_DROME GM10264p OS=Drosophila melanogaster OX=7227 GN=CG6001 PE=2 SV=1;tr|Q9VB64|Q9VB64_DROME Uncharacterized protein, isoform A OS=Drosophila melanogaster OX=7227 GN=Dmel\CG42813 PE=1 SV=3;tr|F2FB73|F2FB73_DROME RH24252p (Fragment) OS=Dros	3	1	1	8.6067	81	29.6	29.6	54520	270840
Q9W4C4;Q7KVW1		spoon	tr|Q9W4C4|Q9W4C4_DROME GM14014p OS=Drosophila melanogaster OX=7227 GN=spoon PE=1 SV=2;tr|Q7KVW1|Q7KVW1_DROME RE73736p OS=Drosophila melanogaster OX=7227 GN=spoon PE=1 SV=1	2	1	1	64.907	585	3.2	3.2	39908	193170
Q9VJ38	39S ribosomal protein L13, mitochondrial	mRpL13	sp|Q9VJ38|RM13_DROME 39S ribosomal protein L13, mitochondrial OS=Drosophila melanogaster OX=7227 GN=mRpL13 PE=2 SV=2	1	1	1	21.09	178	12.4	12.4	119430	576340
T2FGD8;A1Z9A8	Protein PTCD3 homolog, mitochondrial	CG4679-RA;CG4679	tr|T2FGD8|T2FGD8_DROME FI21483p1 OS=Drosophila melanogaster OX=7227 GN=CG4679-RA PE=2 SV=1;sp|A1Z9A8|PTCD3_DROME Protein PTCD3 homolog, mitochondrial OS=Drosophila melanogaster OX=7227 GN=CG4679 PE=2 SV=1	2	4	4	74.206	652	10.6	7.1	910450	4358400
O61491	Flotillin-1	Flo-1	sp|O61491|FLOT1_DROME Flotillin-1 OS=Drosophila melanogaster OX=7227 GN=Flo1 PE=2 SV=1	1	2	2	47.135	426	7.5	7.5	445370	2102300
Q9V466;A1YK65;A1YK63;A1YK62;A1YK61;A1YK60;A1YK59;A1YK58;A1YK57;A1YK55;A1YK56;A1YK54		Nup107	sp|Q9V466|NU107_DROME Nuclear pore complex protein Nup107 OS=Drosophila melanogaster OX=7227 GN=Nup107 PE=1 SV=1;tr|A1YK65|A1YK65_DROME Nuclear pore complex protein OS=Drosophila melanogaster OX=7227 GN=Nup107 PE=3 SV=1;tr|A1YK63|A1YK63_DROME Nuclear pore	12	2	2	97.381	845	4.4	4.4	517400	2434800
Q7PLS8	Integrator complex subunit 3 homolog	IntS3	sp|Q7PLS8|INT3_DROME Integrator complex subunit 3 OS=Drosophila melanogaster OX=7227 GN=IntS3 PE=1 SV=1	1	1	1	123.95	1068	2.2	2.2	132470	622770
Q95U01;C0PVA6;A0A0B4KFB8		CG15187;CG31367-RA	tr|Q95U01|Q95U01_DROME GH18144p OS=Drosophila melanogaster OX=7227 GN=CG15187 PE=2 SV=1;tr|C0PVA6|C0PVA6_DROME MIP09306p OS=Drosophila melanogaster OX=7227 GN=CG31367-RA PE=2 SV=1;tr|A0A0B4KFB8|A0A0B4KFB8_DROME Uncharacterized protein, isoform C OS=Drosoph	3	1	1	49.046	397	4	4	79696	374260
X2JER0;Q9VYH3	Probable alpha-aspartyl dipeptidase	CG2200	tr|X2JER0|X2JER0_DROME Uncharacterized protein, isoform B OS=Drosophila melanogaster OX=7227 GN=Dmel\CG2200 PE=4 SV=1;sp|Q9VYH3|PEPE_DROME Probable alpha-aspartyl dipeptidase OS=Drosophila melanogaster OX=7227 GN=CG2200 PE=2 SV=1	2	2	2	26.598	240	15	15	393050	1823900
Q9VQQ0;Q24466;D2NUE3	Serine/threonine-protein phosphatase 2A activator	Ptpa;Ptpa-RA	tr|Q9VQQ0|Q9VQQ0_DROME Serine/threonine-protein phosphatase 2A activator OS=Drosophila melanogaster OX=7227 GN=Ptpa PE=1 SV=1;tr|Q24466|Q24466_DROME Serine/threonine-protein phosphatase 2A activator OS=Drosophila melanogaster OX=7227 GN=Ptpa PE=2 SV=1;tr|D	3	2	2	44.256	398	5.5	3.8	5298500	24404000
H7BWR6;Q9NIW0;Q2QBM1;H7BWU6;H7BWS7;H7BWS6;H7BWS3;H7BWS2;H7BWR4;Q9U1J1;Q9VG32;Q9NIW1;Q9VG31;Q9NIW2;H7BWU8	Malic enzyme	Men	tr|H7BWR6|H7BWR6_DROME Malic enzyme (Fragment) OS=Drosophila melanogaster OX=7227 PE=2 SV=1;tr|Q9NIW0|Q9NIW0_DROME Malic enzyme OS=Drosophila melanogaster OX=7227 GN=Men PE=2 SV=1;tr|Q2QBM1|Q2QBM1_DROME Malic enzyme OS=Drosophila melanogaster OX=7227 GN=Me	15	3	3	60.881	553	9	6.7	329990	1515200
Q9VZ64	Probable 6-phosphogluconolactonase	CG17333	sp|Q9VZ64|6PGL_DROME Probable 6-phosphogluconolactonase OS=Drosophila melanogaster OX=7227 GN=CG17333 PE=2 SV=1	1	3	3	26.671	243	15.2	22.2	430510	1962300
Q9VQG0		Trn-SR	tr|Q9VQG0|Q9VQG0_DROME LD21546p OS=Drosophila melanogaster OX=7227 GN=Tnpo-SR PE=2 SV=2	1	1	1	105.75	932	2.5	2.5	56792	258770
Q8SXT6;A1Z7K2		CG2396;CG30349-RA	tr|Q8SXT6|Q8SXT6_DROME RE25260p OS=Drosophila melanogaster OX=7227 GN=CG2396 PE=2 SV=1;tr|A1Z7K2|A1Z7K2_DROME FI03455p OS=Drosophila melanogaster OX=7227 GN=CG13750 PE=1 SV=1	2	1	1	68.338	620	4.2	4.2	31402	141550
Q9VNC1;Q7K141		mRpL44	tr|Q9VNC1|Q9VNC1_DROME Mitochondrial ribosomal protein L44 OS=Drosophila melanogaster OX=7227 GN=mRpL44 PE=1 SV=1;tr|Q7K141|Q7K141_DROME LD10028p (Fragment) OS=Drosophila melanogaster OX=7227 GN=mRpL44 PE=2 SV=1	2	5	5	36.251	321	18.4	14.6	694620	3129200
Q961A8		Papss	tr|Q961A8|Q961A8_DROME LD25351p OS=Drosophila melanogaster OX=7227 GN=Papss PE=1 SV=1	1	13	1	71.145	629	24	26.4	8024000	35970000
Q0E9G4;G3LFI2;G3LFG9;Q961L4		Drat;CG1600	tr|Q0E9G4|Q0E9G4_DROME CG1600-PA OS=Drosophila melanogaster OX=7227 GN=Drat PE=1 SV=1;tr|G3LFI2|G3LFI2_DROME CG1600-PA OS=Drosophila melanogaster OX=7227 GN=CG1600 PE=4 SV=1;tr|G3LFG9|G3LFG9_DROME CG1600-PA OS=Drosophila melanogaster OX=7227 GN=CG1600 PE=4	4	6	6	41.387	381	17.6	23.1	1039600	4583800
Q9VAY6		BCAS2	tr|Q9VAY6|Q9VAY6_DROME BCAS2 OS=Drosophila melanogaster OX=7227 GN=BCAS2 PE=1 SV=1	1	1	1	31.341	278	7.9	7.9	291200	1272400
Q9V463		Nup154	sp|Q9V463|NU154_DROME Nuclear pore complex protein Nup154 OS=Drosophila melanogaster OX=7227 GN=Nup154 PE=1 SV=1	1	3	3	153.89	1365	4.5	4.5	782100	3396900
Q2XXZ0;Q9VWE7;Q9BP41		Ranbp21	tr|Q2XXZ0|Q2XXZ0_DROME CG12234 (Fragment) OS=Drosophila melanogaster OX=7227 GN=Ranbp21 PE=4 SV=1;tr|Q9VWE7|Q9VWE7_DROME LD26789p OS=Drosophila melanogaster OX=7227 GN=Ranbp21 PE=1 SV=1;tr|Q9BP41|Q9BP41_DROME RanBP21 OS=Drosophila melanogaster OX=7227 GN=R	3	2	2	137.82	1228	1.4	2	46894	199470
Q9U1K7		EG:140G11.5	tr|Q9U1K7|Q9U1K7_DROME EG:140G11.5 protein OS=Drosophila melanogaster OX=7227 GN=EG:140G11.5 PE=1 SV=1	1	1	1	15.634	135	11.1	11.1	244710	1040800
C0LA78;C0LA70;C0LA69;C0LA68;A0A0E3T5D1;M9PD65;A0A0E3T5D4;A0A0E3T4A9;A0A0E3T479;A0A0E3T462;M9PBD9;A0A0E3X848;Q9VIW3;A0A0E3T458	Ran GTPase-activating protein	Sd-RanGAP;RanGAP	tr|C0LA78|C0LA78_DROME Sd-Ran GTPase activating protein (Fragment) OS=Drosophila melanogaster OX=7227 GN=Sd-RanGAP PE=4 SV=1;tr|C0LA70|C0LA70_DROME Ran GTPase activating protein (Fragment) OS=Drosophila melanogaster OX=7227 GN=RanGAP PE=4 SV=1;tr|C0LA69|C0	14	12	12	39.469	362	31.8	47.2	2423100	10279000
Q9W2G9;Q7K0I0	Acyl-coenzyme A oxidase	Acox57D-p	tr|Q9W2G9|Q9W2G9_DROME Acyl-coenzyme A oxidase OS=Drosophila melanogaster OX=7227 GN=Acox57D-p PE=1 SV=1;tr|Q7K0I0|Q7K0I0_DROME Acyl-coenzyme A oxidase OS=Drosophila melanogaster OX=7227 GN=Acox57D-p PE=2 SV=1	2	1	1	76.003	677	3.2	3.2	69238	293390
Q9VI64			tr|Q9VI64|Q9VI64_DROME LD30995p OS=Drosophila melanogaster OX=7227 GN=Dmel\CG10098 PE=1 SV=1	1	1	1	37.481	353	5.1	5.1	245390	1032700
A5XCL5;Q9VSW2;E8NH18;E1JI91;Q9VSW1		UGP;UGP-RE	tr|A5XCL5|A5XCL5_DROME LD36265p (Fragment) OS=Drosophila melanogaster OX=7227 GN=UGP PE=1 SV=1;tr|Q9VSW2|Q9VSW2_DROME UTP--glucose-1-phosphate uridylyltransferase OS=Drosophila melanogaster OX=7227 GN=UGP PE=1 SV=2;tr|E8NH18|E8NH18_DROME UTP--glucose-1-pho	5	1	1	57.824	511	3.5	3.5	368150	1537400
A0A0B4K6W2;A0A0B4K7S0;P55824	Ubiquitin carboxyl-terminal hydrolase;Probable ubiquitin carboxyl-terminal hydrolase FAF	faf	tr|A0A0B4K6W2|A0A0B4K6W2_DROME Fat facets, isoform E OS=Drosophila melanogaster OX=7227 GN=faf PE=3 SV=1;tr|A0A0B4K7S0|A0A0B4K7S0_DROME Fat facets, isoform D OS=Drosophila melanogaster OX=7227 GN=faf PE=3 SV=1;sp|P55824|FAF_DROME Probable ubiquitin carboxy	3	2	2	309.93	2761	1.4	1.4	122260	490300
Q9VP18;Q8SZ31		VhaM9.7-b	tr|Q9VP18|Q9VP18_DROME V-type proton ATPase subunit OS=Drosophila melanogaster OX=7227 GN=VhaM9.7-b PE=1 SV=2;tr|Q8SZ31|Q8SZ31_DROME V-type proton ATPase subunit OS=Drosophila melanogaster OX=7227 GN=VhaM9.7-b PE=2 SV=1	2	1	1	10.063	89	12.4	12.4	248690	997110
Q9VGH5;Q8INJ6		glo	tr|Q9VGH5|Q9VGH5_DROME AT27789p OS=Drosophila melanogaster OX=7227 GN=glo PE=1 SV=1;tr|Q8INJ6|Q8INJ6_DROME Glorund, isoform C OS=Drosophila melanogaster OX=7227 GN=glo PE=1 SV=1	2	2	2	61.396	586	3.6	5.3	976920	3916700
Q24368;I1V4Y8	Chromatin-remodeling complex ATPase chain Iswi	Iswi;ISWI	sp|Q24368|ISWI_DROME Chromatin-remodeling complex ATPase chain Iswi OS=Drosophila melanogaster OX=7227 GN=Iswi PE=1 SV=1;tr|I1V4Y8|I1V4Y8_DROME Imitation SWI OS=Drosophila melanogaster OX=7227 GN=ISWI PE=3 SV=1	2	10	10	118.87	1027	10.6	10.6	1718700	6845700
Q9VPK7	Putative tRNA pseudouridine synthase Pus10	Pus10	sp|Q9VPK7|PUS10_DROME Putative tRNA pseudouridine synthase Pus10 OS=Drosophila melanogaster OX=7227 GN=Pus10 PE=2 SV=2	1	1	1	56.762	500	3.4	3.4	23760	94560
Q8SYN6;Q9VSC5		CG8209	tr|Q8SYN6|Q8SYN6_DROME RE50471p OS=Drosophila melanogaster OX=7227 GN=CG8209 PE=2 SV=1;tr|Q9VSC5|Q9VSC5_DROME GM09977p OS=Drosophila melanogaster OX=7227 GN=Dmel\CG8209 PE=1 SV=1	2	6	6	36.675	330	25.2	33.3	1838500	7315100
Q9VG81			tr|Q9VG81|Q9VG81_DROME RH49330p OS=Drosophila melanogaster OX=7227 GN=Sccpdh2 PE=1 SV=1	1	3	3	47.25	431	12.5	12.5	404270	1607900
Q8MZC0;Q9VG84	DNA ligase	lig3	tr|Q8MZC0|Q8MZC0_DROME DNA ligase OS=Drosophila melanogaster OX=7227 GN=DNAlig3 PE=2 SV=1;tr|Q9VG84|Q9VG84_DROME DNA ligase OS=Drosophila melanogaster OX=7227 GN=DNAlig3 PE=1 SV=3	2	1	1	78.085	696	1.7	1.7	22911	90579
Q7KTB3;Q8IP79;Q8IP80;Q9VK25;Q95SU1		Pect	tr|Q7KTB3|Q7KTB3_DROME Phosphoethanolamine cytidylyltransferase, isoform E OS=Drosophila melanogaster OX=7227 GN=Pect PE=1 SV=1;tr|Q8IP79|Q8IP79_DROME Phosphoethanolamine cytidylyltransferase, isoform C OS=Drosophila melanogaster OX=7227 GN=Pect PE=1 SV=2;	5	7	7	41.762	371	18.3	18.9	1319600	5216600
Q8T9C9;A0A0B4LHR3;Q9GQN5	Transcriptional regulator ATRX homolog	XNP	tr|Q8T9C9|Q8T9C9_DROME SD07188p OS=Drosophila melanogaster OX=7227 GN=XNP PE=2 SV=1;tr|A0A0B4LHR3|A0A0B4LHR3_DROME XNP, isoform C OS=Drosophila melanogaster OX=7227 GN=XNP PE=1 SV=1;sp|Q9GQN5|ATRX_DROME Transcriptional regulator ATRX homolog OS=Drosophila	3	3	3	74.495	655	4.9	3.4	421960	1667100
Q9NHY8;Q9VUX1;Q95S88		cav;mRpS31	tr|Q9NHY8|Q9NHY8_DROME Uncharacterized protein (Fragment) OS=Drosophila melanogaster OX=7227 GN=cav PE=2 SV=1;tr|Q9VUX1|Q9VUX1_DROME Mitochondrial ribosomal protein S31 OS=Drosophila melanogaster OX=7227 GN=mRpS31 PE=1 SV=1;tr|Q95S88|Q95S88_DROME GM05661p	3	1	1	28.43	237	8.4	8.4	140630	553910
A0A0C4DHE6;Q9VFS5;Q8MSW1	Serine/threonine-protein phosphatase 4 regulatory subunit 3	flfl	tr|A0A0C4DHE6|A0A0C4DHE6_DROME Falafel, isoform E OS=Drosophila melanogaster OX=7227 GN=flfl PE=1 SV=1;sp|Q9VFS5|PP4R3_DROME Serine/threonine-protein phosphatase 4 regulatory subunit 3 OS=Drosophila melanogaster OX=7227 GN=flfl PE=1 SV=4;tr|Q8MSW1|Q8MSW1_D	3	2	2	109.29	980	3.2	3.2	262900	1035100
Q7KSN0;Q9VGA4		MBD-R2	tr|Q7KSN0|Q7KSN0_DROME SD10773p OS=Drosophila melanogaster OX=7227 GN=MBD-R2 PE=2 SV=1;tr|Q9VGA4|Q9VGA4_DROME MBD-R2 OS=Drosophila melanogaster OX=7227 GN=MBD-R2 PE=1 SV=2	2	1	1	119.85	1081	1.6	1.6	34583	135280
Q9VJZ7	Ribosomal RNA processing protein 1 homolog	Nnp-1	sp|Q9VJZ7|RRP1L_DROME Ribosomal RNA processing protein 1 homolog OS=Drosophila melanogaster OX=7227 GN=Nnp-1 PE=1 SV=1	1	2	2	78.995	687	5.4	3.9	70764	275090
Q9VD22			tr|Q9VD22|Q9VD22_DROME LP02352p OS=Drosophila melanogaster OX=7227 GN=Dmel\CG18596 PE=1 SV=2	1	1	1	130.19	1136	1.7	1.7	144770	554990
Q7K1C3			tr|Q7K1C3|Q7K1C3_DROME GH22096p OS=Drosophila melanogaster OX=7227 GN=Dmel\CG6984 PE=1 SV=1	1	1	1	31.168	285	6.7	6.7	352880	1326400
Q7YU86;A1ZB84		CG12263;CG12263-RA	tr|Q7YU86|Q7YU86_DROME SD07983p OS=Drosophila melanogaster OX=7227 GN=PIG-O PE=2 SV=1;tr|A1ZB84|A1ZB84_DROME FI22105p1 OS=Drosophila melanogaster OX=7227 GN=PIG-O PE=1 SV=1	2	4	4	121.3	1077	4.9	5.2	663660	2489000
Q8T8Q1;A1Z6H6		CG7791	tr|Q8T8Q1|Q8T8Q1_DROME SD07787p OS=Drosophila melanogaster OX=7227 GN=CG7791 PE=2 SV=1;tr|A1Z6H6|A1Z6H6_DROME Uncharacterized protein OS=Drosophila melanogaster OX=7227 GN=Dmel\CG7791 PE=1 SV=1	2	5	5	80.236	699	6.3	9.4	538730	2015400
Q9GYU8	Nuclear pore complex protein Nup88	mbo	sp|Q9GYU8|NUP88_DROME Nuclear pore complex protein Nup88 OS=Drosophila melanogaster OX=7227 GN=mbo PE=1 SV=2	1	4	4	78.68	702	7.4	9	598930	2239500
Q8SWU9;H5V895;Q8T0U6;P48462	Serine/threonine-protein phosphatase;Serine/threonine-protein phosphatase beta isoform	flw	tr|Q8SWU9|Q8SWU9_DROME Serine/threonine-protein phosphatase OS=Drosophila melanogaster OX=7227 GN=flw PE=2 SV=1;tr|H5V895|H5V895_DROME Serine/threonine-protein phosphatase OS=Drosophila melanogaster OX=7227 GN=flw PE=1 SV=1;tr|Q8T0U6|Q8T0U6_DROME Serine/th	4	2	1	37.772	330	8.5	5.5	145640	534340
Q9W1Q5;Q8MQP1		CG3520-RA;CG3520	tr|Q9W1Q5|Q9W1Q5_DROME FI21439p1 OS=Drosophila melanogaster OX=7227 GN=Dmel\CG3520 PE=2 SV=2;tr|Q8MQP1|Q8MQP1_DROME RE24967p OS=Drosophila melanogaster OX=7227 GN=CG3520 PE=2 SV=1	2	1	1	137.12	1204	1.7	1.7	50115	180890
Q9W127			tr|Q9W127|Q9W127_DROME GH17932p OS=Drosophila melanogaster OX=7227 GN=Dmel\CG3663 PE=1 SV=1	1	3	3	23.281	208	15.9	21.2	322250	1149800
B3STG5;B3STH6;B3STH3;B3STH2;B3STH0;B3STG9;B3STG7;B3STG6;B3STG4;B3STG3;B3STG2;P24785;A8ILB3;A8ILA7;A8IL99;A8IL95;A8IL87;A8IL83;I1V4Y3;A8ILB0;A8ILA2;A1Z6I8	Dosage compensation regulator	MLE;mle	tr|B3STG5|B3STG5_DROME Maleless OS=Drosophila melanogaster OX=7227 GN=MLE PE=4 SV=1;tr|B3STH6|B3STH6_DROME Maleless OS=Drosophila melanogaster OX=7227 GN=MLE PE=4 SV=1;tr|B3STH3|B3STH3_DROME Maleless OS=Drosophila melanogaster OX=7227 GN=MLE PE=4 SV=1;tr|B	22	4	4	143.06	1286	5.8	4.4	401700	1432800
Q9VNI8		Hpr1	tr|Q9VNI8|Q9VNI8_DROME Hpr1 OS=Drosophila melanogaster OX=7227 GN=Hpr1 PE=1 SV=1	1	1	1	80.759	701	2.3	2.3	121800	433670
C9QP02;Q9VCN6		cdc16-RA;Cdc16	tr|C9QP02|C9QP02_DROME MIP13609p (Fragment) OS=Drosophila melanogaster OX=7227 GN=cdc16-RA PE=2 SV=1;tr|Q9VCN6|Q9VCN6_DROME Cell division cycle 16 OS=Drosophila melanogaster OX=7227 GN=Cdc16 PE=1 SV=1	2	1	1	30.344	263	6.8	6.8	138700	493030
Q9VLR3			tr|Q9VLR3|Q9VLR3_DROME Cytidine deaminase OS=Drosophila melanogaster OX=7227 GN=BcDNA:LP03131 PE=1 SV=1	1	1	1	16.999	158	12.7	12.7	42630	150350
Q9VHV9;Q29QU4			tr|Q9VHV9|Q9VHV9_DROME Uncharacterized protein OS=Drosophila melanogaster OX=7227 GN=Dmel\CG7900 PE=4 SV=3;tr|Q29QU4|Q29QU4_DROME IP12474p OS=Drosophila melanogaster OX=7227 PE=2 SV=1	2	2	2	58.822	536	4.5	4.5	273710	959020
Q8SXF0		mRpS9	tr|Q8SXF0|Q8SXF0_DROME Mitochondrial ribosomal protein S9 OS=Drosophila melanogaster OX=7227 GN=mRpS9 PE=1 SV=1	1	2	2	45.268	395	6.6	6.6	93100	325700
Q9VQD8	Actin-related protein 2/3 complex subunit 5	Arpc5	tr|Q9VQD8|Q9VQD8_DROME Actin-related protein 2/3 complex subunit 5 OS=Drosophila melanogaster OX=7227 GN=Arpc5 PE=1 SV=1	1	2	2	16.669	151	22.5	22.5	1211400	4221200
Q541C9;O76511	Thymidylate synthase	Ts	tr|Q541C9|Q541C9_DROME RE18955p OS=Drosophila melanogaster OX=7227 GN=Ts PE=1 SV=1;sp|O76511|TYSY_DROME Thymidylate synthase OS=Drosophila melanogaster OX=7227 GN=Ts PE=1 SV=2	2	4	4	36.656	321	17.1	14.3	1615700	5577000
Q9VYW4;Q8MQQ7;B4YWX7;B4YWX2;B4YWW9;B4YWW6;F6J1Q1;F6J1P5;F6J1P3;A9YGF2;A9YGF0;A9YGE9;A9YGE8;F6J9N4;F6J9M9		CG1703	tr|Q9VYW4|Q9VYW4_DROME LD04461p OS=Drosophila melanogaster OX=7227 GN=Dmel\CG1703 PE=1 SV=1;tr|Q8MQQ7|Q8MQQ7_DROME LD35151p (Fragment) OS=Drosophila melanogaster OX=7227 GN=CG1703 PE=2 SV=1	15	8	8	101.54	901	14.4	16.1	2837300	9740100
Q9VGZ3;Q9NFX2;C7LA95;O76935;B5T1X5;B5T1X0	Aconitate hydratase	Irp-1B	tr|Q9VGZ3|Q9VGZ3_DROME Iron regulatory protein 1B OS=Drosophila melanogaster OX=7227 GN=Irp-1B PE=1 SV=1;tr|Q9NFX2|Q9NFX2_DROME Iron regulatory protein 1B OS=Drosophila melanogaster OX=7227 GN=Irp-1B PE=2 SV=1;tr|C7LA95|C7LA95_DROME FI05817p (Fragment) OS=	6	19	14	98.577	899	24.4	16.6	6941000	23790000
P36951	Putative hydroxypyruvate isomerase	Gip	sp|P36951|HYI_DROME Putative hydroxypyruvate isomerase OS=Drosophila melanogaster OX=7227 GN=Gip PE=2 SV=1	1	4	4	29.093	264	19.7	8	418100	1429500
M9PHJ6;A8JUQ9;Q9NHV9	Protein vav	Vav	tr|M9PHJ6|M9PHJ6_DROME Vav guanine nucleotide exchange factor, isoform D OS=Drosophila melanogaster OX=7227 GN=Vav PE=1 SV=1;tr|A8JUQ9|A8JUQ9_DROME Vav guanine nucleotide exchange factor, isoform C OS=Drosophila melanogaster OX=7227 GN=Vav PE=1 SV=1;sp|Q9N	3	1	1	109.43	964	1.8	1.8	116470	394660
A0A0B4LEV2;Q26454;Q5BI95	DNA replication licensing factor MCM4	dpa	tr|A0A0B4LEV2|A0A0B4LEV2_DROME DNA helicase OS=Drosophila melanogaster OX=7227 GN=dpa PE=1 SV=1;sp|Q26454|MCM4_DROME DNA replication licensing factor MCM4 OS=Drosophila melanogaster OX=7227 GN=dpa PE=1 SV=2	3	13	13	96.609	866	18.7	23.1	7493500	25163000
Q95U55;Q7JRC3;C8AXZ5;C8AXY8;C8AXY5;C8AXY2;C8AXY1		Jheh1	tr|Q95U55|Q95U55_DROME GH06241p OS=Drosophila melanogaster OX=7227 GN=Jheh1 PE=2 SV=1;tr|Q7JRC3|Q7JRC3_DROME Epoxide hydrolase OS=Drosophila melanogaster OX=7227 GN=Jheh1 PE=2 SV=1;tr|C8AXZ5|C8AXZ5_DROME Epoxide hydrolase OS=Drosophila melanogaster OX=7227	7	3	3	29.124	253	10.7	10.7	367160	1229300
Q9VCR2;Q7JUX5	Aminoacylase-1	CG6726	tr|Q9VCR2|Q9VCR2_DROME Uncharacterized protein, isoform A OS=Drosophila melanogaster OX=7227 GN=Dmel\CG6726 PE=1 SV=2;tr|Q7JUX5|Q7JUX5_DROME RE13549p (Fragment) OS=Drosophila melanogaster OX=7227 GN=CG6726 PE=2 SV=1	2	4	4	44.998	401	20.2	14	834180	2788900
D5SHS6;Q9VIX3;Q9GSE0;Q8MQX3;Q8INW7;D3DMM0;Q9VIX2;Q9BPQ9;Q2PDT4		Pax-RF;Pax	tr|D5SHS6|D5SHS6_DROME RE18088p OS=Drosophila melanogaster OX=7227 GN=Pax-RF PE=2 SV=1;tr|Q9VIX3|Q9VIX3_DROME Paxillin, isoform B OS=Drosophila melanogaster OX=7227 GN=Pax PE=1 SV=2;tr|Q9GSE0|Q9GSE0_DROME Focal contact protein paxillin OS=Drosophila melano	9	1	1	30.937	286	4.5	4.5	101910	339940
A0A0B4KF23;E1JGX3;A8WHK9;Q7PLI2	Nipped-B protein	Nipped-B	tr|A0A0B4KF23|A0A0B4KF23_DROME Nipped-B protein OS=Drosophila melanogaster OX=7227 GN=Nipped-B PE=1 SV=1;tr|E1JGX3|E1JGX3_DROME Nipped-B protein OS=Drosophila melanogaster OX=7227 GN=Nipped-B PE=1 SV=1;tr|A8WHK9|A8WHK9_DROME Nipped-B protein OS=Drosophila	4	1	1	223.3	1957	0.7	0.7	15671	51952
N0BKF4;Q9VQF9	SNAPIN protein homolog	snapin-RA;snapin	tr|N0BKF4|N0BKF4_DROME SNAPIN protein homolog OS=Drosophila melanogaster OX=7227 GN=snapin-RA PE=2 SV=1;sp|Q9VQF9|SNAPN_DROME SNAPIN protein homolog OS=Drosophila melanogaster OX=7227 GN=Snapin PE=1 SV=1	2	1	1	15.056	134	12.7	12.7	152620	504310
Q9VSL4;Q7K206		GstO2	tr|Q9VSL4|Q9VSL4_DROME Glutathione S transferase O2, isoform B OS=Drosophila melanogaster OX=7227 GN=GstO2 PE=1 SV=2;tr|Q7K206|Q7K206_DROME LD27185p (Fragment) OS=Drosophila melanogaster OX=7227 GN=GstO2 PE=2 SV=1	2	7	7	28.725	250	19.2	22.8	1936600	6381700
Q9VPQ7;A7KX20;A7KX19		Spp;spp	tr|Q9VPQ7|Q9VPQ7_DROME SD07518p OS=Drosophila melanogaster OX=7227 GN=Spp PE=1 SV=1;tr|A7KX20|A7KX20_DROME Signal peptide peptidase OS=Drosophila melanogaster OX=7227 GN=spp PE=4 SV=1;tr|A7KX19|A7KX19_DROME Signal peptide peptidase OS=Drosophila melanogast	3	4	4	43.214	389	5.9	5.9	1019500	3334700
Q5U0X8			tr|Q5U0X8|Q5U0X8_DROME LD10780p OS=Drosophila melanogaster OX=7227 GN=Dmel\CG12325 PE=1 SV=1	1	1	1	105.99	949	1.4	1.4	68706	223720
Q9VQG4	Congested-like trachea protein	colt	sp|Q9VQG4|COLT_DROME Congested-like trachea protein OS=Drosophila melanogaster OX=7227 GN=colt PE=2 SV=1	1	1	1	32.952	306	3.3	3.3	1717700	5552100
M9PBM1;Q94535	Splicing factor U2af 38 kDa subunit	U2af38	tr|M9PBM1|M9PBM1_DROME U2 small nuclear riboprotein auxiliary factor 38, isoform B OS=Drosophila melanogaster OX=7227 GN=U2af38 PE=4 SV=1;sp|Q94535|U2AF1_DROME Splicing factor U2af 38 kDa subunit OS=Drosophila melanogaster OX=7227 GN=U2af38 PE=1 SV=2	2	2	2	29.877	264	5.3	5.3	272430	878740
H5V8E9;Q9W1A2	N-alpha-acetyltransferase, 35 NatC auxiliary subunit homolog	CG4065-RB;CG4065	tr|H5V8E9|H5V8E9_DROME FI19334p1 OS=Drosophila melanogaster OX=7227 GN=CG4065-RB PE=2 SV=1;sp|Q9W1A2|NAA35_DROME N-alpha-acetyltransferase 35, NatC auxiliary subunit homolog OS=Drosophila melanogaster OX=7227 GN=Naa35 PE=2 SV=1	2	1	1	89.116	783	2.4	2.4	204590	659060
Q8T008;A1Z8A7;A8DY95			tr|Q8T008|Q8T008_DROME LD42374p OS=Drosophila melanogaster OX=7227 GN=Dmel\CG11883 PE=1 SV=1;tr|A1Z8A7|A1Z8A7_DROME Uncharacterized protein, isoform A OS=Drosophila melanogaster OX=7227 GN=Dmel\CG11883 PE=1 SV=1;tr|A8DY95|A8DY95_DROME Uncharacterized prote	3	1	1	78.519	713	2	2	264030	848690
Q27IU9;Q27IU8;Q27IU7;Q27IU6;Q27IU5;Q27IU4;Q27IU3;Q27IU2;Q9VCU9	Endoribonuclease Dcr-1	Dcr-1	tr|Q27IU9|Q27IU9_DROME Dicer-1 (Fragment) OS=Drosophila melanogaster OX=7227 GN=Dcr-1 PE=4 SV=1;tr|Q27IU8|Q27IU8_DROME Dicer-1 (Fragment) OS=Drosophila melanogaster OX=7227 GN=Dcr-1 PE=4 SV=1;tr|Q27IU7|Q27IU7_DROME Dicer-1 (Fragment) OS=Drosophila melanoga	9	1	1	231.18	2043	0.8	0.8	73321	234160
Q9VCC0	Cysteine and histidine-rich domain-containing protein	CHORD	sp|Q9VCC0|CHRD1_DROME Cysteine and histidine-rich domain-containing protein OS=Drosophila melanogaster OX=7227 GN=CHORD PE=1 SV=1	1	1	1	40.24	354	3.1	3.1	505990	1597100
Q9VQI5		CG3098	tr|Q9VQI5|Q9VQI5_DROME LP04564p OS=Drosophila melanogaster OX=7227 GN=CG3098 PE=1 SV=2	1	4	4	47.327	425	9.6	12.9	644190	2031200
A0A0C4FEI6;Q9VF28	Actin-related protein 2/3 complex subunit 3	Arpc3A	tr|A0A0C4FEI6|A0A0C4FEI6_DROME Actin-related protein 2/3 complex subunit 3 OS=Drosophila melanogaster OX=7227 PE=2 SV=1;tr|Q9VF28|Q9VF28_DROME Actin-related protein 2/3 complex subunit 3 OS=Drosophila melanogaster OX=7227 GN=Arpc3A PE=1 SV=4	2	2	2	18.281	160	17.5	17.5	372820	1173300
A0A0S0X8K7;Q9W4V8	Mitochondrial import inner membrane translocase subunit TIM50-C	ttm50	tr|A0A0S0X8K7|A0A0S0X8K7_DROME Mitochondrial import inner membrane translocase subunit TIM50 OS=Drosophila melanogaster OX=7227 GN=ttm50 PE=3 SV=1;sp|Q9W4V8|TI50C_DROME Mitochondrial import inner membrane translocase subunit TIM50-C OS=Drosophila melanogas	2	4	4	49.671	428	11.4	9.1	785120	2452900
A4V4F2;M9PHT0;F2FB46;M9PJN2;M9PHL7;O61492;C9QP31;E1JJL2	Flotillin-2	Flo2;Flo-2	tr|A4V4F2|A4V4F2_DROME Flotillin 2, isoform F OS=Drosophila melanogaster OX=7227 GN=Flo2 PE=1 SV=1;tr|M9PHT0|M9PHT0_DROME Flotillin 2, isoform I OS=Drosophila melanogaster OX=7227 GN=Flo2 PE=1 SV=1;tr|F2FB46|F2FB46_DROME Flotillin 2, isoform K OS=Drosophil	8	3	3	46.602	425	6.6	9.4	465370	1452400
B4F5V1;B4F5V0;B4F5U4;Q9VYY2	Signal peptidase complex subunit 2	CG1751;Spase25	tr|B4F5V1|B4F5V1_DROME CG1751-PA OS=Drosophila melanogaster OX=7227 GN=CG1751 PE=4 SV=1;tr|B4F5V0|B4F5V0_DROME CG1751-PA OS=Drosophila melanogaster OX=7227 GN=CG1751 PE=4 SV=1;tr|B4F5U4|B4F5U4_DROME CG1751-PA OS=Drosophila melanogaster OX=7227 GN=Spase25 P	4	7	7	22.117	199	30.7	35.2	8819100	27308000
M9NCV1;Q9VJD3	Conserved oligomeric Golgi complex subunit 5	fws	tr|M9NCV1|M9NCV1_DROME Four way stop, isoform D OS=Drosophila melanogaster OX=7227 GN=fws PE=4 SV=1;sp|Q9VJD3|COG5_DROME Conserved oligomeric Golgi complex subunit 5 OS=Drosophila melanogaster OX=7227 GN=fws PE=2 SV=1	2	1	1	84.953	751	2	2	36639	112710
Q8IPP3;A0A0B4KF82;Q8IPP4;Q24279;A0A0B4KGI6;A0A0B4KG43;Q9VN82;Q95TT5		cno	tr|Q8IPP3|Q8IPP3_DROME Canoe, isoform D OS=Drosophila melanogaster OX=7227 GN=cno PE=1 SV=2;tr|A0A0B4KF82|A0A0B4KF82_DROME Canoe, isoform I OS=Drosophila melanogaster OX=7227 GN=cno PE=1 SV=1;tr|Q8IPP4|Q8IPP4_DROME Canoe, isoform C OS=Drosophila melanogast	8	1	1	200.51	1817	0.9	0.9	78233	240220
M9NE68;P02516	Heat shock protein 23	Hsp23	tr|M9NE68|M9NE68_DROME Heat shock protein 23, isoform B OS=Drosophila melanogaster OX=7227 GN=Hsp23 PE=3 SV=1;sp|P02516|HSP23_DROME Heat shock protein 23 OS=Drosophila melanogaster OX=7227 GN=Hsp23 PE=2 SV=2	2	13	13	20.629	186	69.4	72	34130000	104670000
Q7K3F6;Q8MQJ3;Q9VS83;B3DNM3;M9PHN9;M9PBU3;B7Z0D4;M9ND57;Q9VS82;M9PEE7;B7Z0D3		CG7546	tr|Q7K3F6|Q7K3F6_DROME LD31525p OS=Drosophila melanogaster OX=7227 GN=CG7546 PE=2 SV=1;tr|Q8MQJ3|Q8MQJ3_DROME LD36241p (Fragment) OS=Drosophila melanogaster OX=7227 GN=CG7546 PE=2 SV=1;tr|Q9VS83|Q9VS83_DROME LD23551p OS=Drosophila melanogaster OX=7227 GN=D	11	2	2	103.1	977	6.8	2.9	422120	1285700
M9NE73;Q9VT65	Calpain-B;Calpain-B catalytic subunit 1;Calpain-B catalytic subunit 2	CalpB	tr|M9NE73|M9NE73_DROME Calpain-B, isoform B OS=Drosophila melanogaster OX=7227 GN=CalpB PE=3 SV=1;sp|Q9VT65|CANB_DROME Calpain-B OS=Drosophila melanogaster OX=7227 GN=CalpB PE=1 SV=2	2	4	2	103.81	925	5.6	7.2	36418	110690
Q9VF89	39S ribosomal protein L9, mitochondrial	mRpL9	sp|Q9VF89|RM09_DROME 39S ribosomal protein L9, mitochondrial OS=Drosophila melanogaster OX=7227 GN=mRpL9 PE=2 SV=1	1	1	1	28.804	248	5.2	5.2	138880	420380
Q9VIG1;Q95RG7		CG12050-RB;CG12050	tr|Q9VIG1|Q9VIG1_DROME FI12406p OS=Drosophila melanogaster OX=7227 GN=l(2)05287 PE=1 SV=2;tr|Q95RG7|Q95RG7_DROME LD30416p OS=Drosophila melanogaster OX=7227 GN=l(2)05287 PE=2 SV=1	2	2	2	120.01	1071	2.9	4.3	261130	788660
Q8IN02		Dph5	tr|Q8IN02|Q8IN02_DROME BcDNA.LD12153 OS=Drosophila melanogaster OX=7227 GN=Dph5 PE=1 SV=2	1	3	3	31.619	281	17.8	11.7	1722200	5199400
Q9W1V8;A0AQB7;A0AQB0;A0AQB1		l(2)06496;CG9893	tr|Q9W1V8|Q9W1V8_DROME CG9893 protein OS=Drosophila melanogaster OX=7227 GN=DCTN3-p24 PE=1 SV=1;tr|A0AQB7|A0AQB7_DROME CG9893 protein OS=Drosophila melanogaster OX=7227 GN=CG9893 PE=4 SV=1;tr|A0AQB0|A0AQB0_DROME CG9893 protein OS=Drosophila melanogaster OX	4	4	4	21.478	192	31.8	32.3	692600	2078800
R9QRD4;A0A0B4KI00;Q9VCA2	Organic cation transporter protein	ORCT;Orct	tr|R9QRD4|R9QRD4_DROME Organic cation transporter OS=Drosophila melanogaster OX=7227 GN=ORCT PE=2 SV=1;tr|A0A0B4KI00|A0A0B4KI00_DROME Organic cation transporter, isoform B OS=Drosophila melanogaster OX=7227 GN=Orct PE=4 SV=1;sp|Q9VCA2|ORCT_DROME Organic ca	3	2	2	61.036	548	6.9	3.8	678850	2007400
Q9VGP7		mRpL40	tr|Q9VGP7|Q9VGP7_DROME Mitochondrial ribosomal protein L40 OS=Drosophila melanogaster OX=7227 GN=mRpL40 PE=1 SV=1	1	1	1	22.555	196	11.2	11.2	93888	276840
Q9VCE6	Probable N6-adenosine-methyltransferase MT-A70-like protein	Ime4	sp|Q9VCE6|MTA70_DROME N6-adenosine-methyltransferase MT-A70-like protein OS=Drosophila melanogaster OX=7227 GN=Mettl3 PE=1 SV=1	1	1	1	68.1	608	2.6	2.6	398400	1172400
Q9VG69			tr|Q9VG69|Q9VG69_DROME LP03547p OS=Drosophila melanogaster OX=7227 GN=Dmel\CG5844 PE=1 SV=1	1	7	7	41.619	378	27	27	4518200	13292000
Q9VPD2	Cytosolic Fe-S cluster assembly factor NUBP2 homolog	CG4858	sp|Q9VPD2|NUBP2_DROME Cytosolic Fe-S cluster assembly factor NUBP2 homolog OS=Drosophila melanogaster OX=7227 GN=CG4858 PE=1 SV=1	1	1	1	28.25	260	11.5	11.5	248340	729120
A0A0B4K849;A0A0B4K7A5;A8DYJ2;Q02645;Q6NLI3;B8A408;C3KGQ7	Protein hu-li tai shao	hts	tr|A0A0B4K849|A0A0B4K849_DROME Hu li tai shao, isoform O OS=Drosophila melanogaster OX=7227 GN=hts PE=1 SV=1;tr|A0A0B4K7A5|A0A0B4K7A5_DROME Hu li tai shao, isoform Q OS=Drosophila melanogaster OX=7227 GN=hts PE=1 SV=1;tr|A8DYJ2|A8DYJ2_DROME Hu li tai shao,	7	15	15	79.063	716	25.1	33.8	7486000	21960000
Q9W2X6		ATPsyndelta	tr|Q9W2X6|Q9W2X6_DROME ATP synthase, delta subunit, isoform A OS=Drosophila melanogaster OX=7227 GN=ATPsyndelta PE=1 SV=1	1	5	5	16.728	157	33.8	38.2	7069500	20714000
E1JHM5;E0R948;Q9I7L8;B8A417		CG31688-RC;Cdc23;cdc23-RA	tr|E1JHM5|E1JHM5_DROME Uncharacterized protein, isoform B OS=Drosophila melanogaster OX=7227 GN=Dmel\CG31687 PE=4 SV=1;tr|E0R948|E0R948_DROME MIP23949p (Fragment) OS=Drosophila melanogaster OX=7227 GN=CG31688-RC PE=2 SV=1;tr|Q9I7L8|Q9I7L8_DROME Cell divisi	4	1	1	40.816	351	2.8	2.8	41333	119760
P54352;X2JFQ7	Ethanolamine kinase	eas	sp|P54352|EAS_DROME Ethanolamine kinase OS=Drosophila melanogaster OX=7227 GN=eas PE=1 SV=2;tr|X2JFQ7|X2JFQ7_DROME Easily shocked, isoform J OS=Drosophila melanogaster OX=7227 GN=eas PE=4 SV=1	2	4	4	59.562	518	7.3	6.4	923710	2668200
A0A0B4KGK3;Q95RA8	MOB kinase activator-like 1	mats	tr|A0A0B4KGK3|A0A0B4KGK3_DROME Mob as tumor suppressor, isoform B OS=Drosophila melanogaster OX=7227 GN=mats PE=4 SV=1;sp|Q95RA8|MOB1_DROME MOB kinase activator-like 1 OS=Drosophila melanogaster OX=7227 GN=mats PE=1 SV=1	2	3	3	25.229	219	10	10	261290	754620
Q8T060;Q6NKM4;E4NKL6;Q9VUR3	Probable aminoacyl tRNA synthase complex-interacting multifunctional protein 2	CG12304-RB;CG12304-RA;CG12304	tr|Q8T060|Q8T060_DROME AaRS-interacting multifunctional protein 2, isoform B OS=Drosophila melanogaster OX=7227 GN=AIMP2 PE=1 SV=3;tr|Q6NKM4|Q6NKM4_DROME LP12114p (Fragment) OS=Drosophila melanogaster OX=7227 PE=2 SV=1;tr|E4NKL6|E4NKL6_DROME RE70278p (Frag	4	5	5	33.241	301	14	16.9	2362500	6798000
Q9VYG2	Brahma-associated protein of 60 kDa	Bap60	sp|Q9VYG2|BAP60_DROME Brahma-associated protein of 60 kDa OS=Drosophila melanogaster OX=7227 GN=Bap60 PE=1 SV=1	1	5	5	58.17	515	16.7	14.6	1948200	5550000
Q9VPB8		Pex14	tr|Q9VPB8|Q9VPB8_DROME Peroxin 14 OS=Drosophila melanogaster OX=7227 GN=Pex14 PE=1 SV=1	1	2	2	30.804	280	10	10	1806800	5143400
Q9VEP6;Q95SP9	Adenylosuccinate lyase	AdSL	tr|Q9VEP6|Q9VEP6_DROME Adenylosuccinate lyase OS=Drosophila melanogaster OX=7227 GN=AdSL PE=1 SV=1;tr|Q95SP9|Q95SP9_DROME Adenylosuccinate lyase OS=Drosophila melanogaster OX=7227 GN=AdSL PE=2 SV=1	2	7	7	53.797	481	15.8	18.1	4118900	11715000
Q9Y148;Q7KJA9;Q95RP9		sxc	tr|Q9Y148|Q9Y148_DROME BcDNA.GH04245 (Fragment) OS=Drosophila melanogaster OX=7227 GN=sxc PE=2 SV=1;tr|Q7KJA9|Q7KJA9_DROME O-glycosyltransferase OS=Drosophila melanogaster OX=7227 GN=sxc PE=1 SV=1;tr|Q95RP9|Q95RP9_DROME LD16758p OS=Drosophila melanogaster	3	3	3	113.02	1011	4.8	4.8	894090	2536500
Q7JV69		Spn55B	tr|Q7JV69|Q7JV69_DROME SD11922p OS=Drosophila melanogaster OX=7227 GN=Spn55B PE=1 SV=1	1	3	3	42.148	374	9.9	11.8	731790	2072400
Q7K738		Ubc10	tr|Q7K738|Q7K738_DROME EG:52C10.4 protein OS=Drosophila melanogaster OX=7227 GN=Ubc10 PE=1 SV=1	1	3	3	17.907	154	14.3	21.4	228200	646200
Q9VJW1		Sec71	tr|Q9VJW1|Q9VJW1_DROME LD29171p OS=Drosophila melanogaster OX=7227 GN=Sec71 PE=1 SV=2	1	2	2	187.81	1653	2.5	2.5	138340	391210
Q8MRF8;T2FFJ2;Q9VQR8		CG3229;CG33123-RA	tr|Q8MRF8|Q8MRF8_DROME SD07726p OS=Drosophila melanogaster OX=7227 GN=LeuRS PE=2 SV=1;tr|T2FFJ2|T2FFJ2_DROME FI21214p1 OS=Drosophila melanogaster OX=7227 GN=CG33123-RA PE=2 SV=1;tr|Q9VQR8|Q9VQR8_DROME Leucyl-tRNA synthetase, isoform A OS=Drosophila melanog	3	14	14	134.92	1182	16.8	20.6	4714300	13291000
Q9VEA2		Vps39	tr|Q9VEA2|Q9VEA2_DROME GH10703p OS=Drosophila melanogaster OX=7227 GN=Vps39 PE=2 SV=1	1	1	1	100.16	876	1.4	1.4	18640	52315
P91927	LETM1 and EF-hand domain-containing protein anon-60Da, mitochondrial	Letm1	sp|P91927|LETM1_DROME Mitochondrial proton/calcium exchanger protein OS=Drosophila melanogaster OX=7227 GN=Letm1 PE=2 SV=2	1	1	1	113.58	1013	2	2	168380	472550
Q8MKJ6;B6IDS9		CG11777-RA	tr|Q8MKJ6|Q8MKJ6_DROME Peptidyl-prolyl cis-trans isomerase OS=Drosophila melanogaster OX=7227 GN=cg11777 PE=1 SV=1;tr|B6IDS9|B6IDS9_DROME Peptidyl-prolyl cis-trans isomerase (Fragment) OS=Drosophila melanogaster OX=7227 GN=CG11777-RA PE=2 SV=1	2	1	1	17.838	161	11.8	11.8	202990	567050
Q8SXC2;Q8IGP9		CG6950-RC;CG6950	tr|Q8SXC2|Q8SXC2_DROME FI04487p OS=Drosophila melanogaster OX=7227 GN=Dmel\CG6950 PE=1 SV=1;tr|Q8IGP9|Q8IGP9_DROME RE50216p OS=Drosophila melanogaster OX=7227 GN=CG6950 PE=2 SV=1	2	2	2	51.201	450	7.3	5.6	337670	931570
Q4V3Z5			tr|Q4V3Z5|Q4V3Z5_DROME IP10727p OS=Drosophila melanogaster OX=7227 GN=Dmel\CG11788 PE=2 SV=1	1	2	2	48.783	425	4.9	7.1	80966	223000
Q9VZF3			tr|Q9VZF3|Q9VZF3_DROME RE09466p OS=Drosophila melanogaster OX=7227 GN=BcDNA:RE09466 PE=1 SV=2	1	1	1	24.773	221	6.3	6.3	118720	326710
M9ZYW3;D9PTS4;P40417	Mitogen-activated protein kinase;Mitogen-activated protein kinase ERK-A	rl-RE;rl-RB;rl	tr|M9ZYW3|M9ZYW3_DROME Mitogen-activated protein kinase OS=Drosophila melanogaster OX=7227 GN=rl-RE PE=2 SV=2;tr|D9PTS4|D9PTS4_DROME Mitogen-activated protein kinase (Fragment) OS=Drosophila melanogaster OX=7227 GN=rl-RB PE=2 SV=1;sp|P40417|ERKA_DROME Mito	3	4	4	46.806	407	15.5	17.7	1576300	4334400
Q9VXK6	Eukaryotic translation initiation factor 5	eIF5	sp|Q9VXK6|IF5_DROME Eukaryotic translation initiation factor 5 OS=Drosophila melanogaster OX=7227 GN=eIF5 PE=1 SV=1	1	1	1	51.699	464	1.9	1.9	203150	557980
O77425		Dredd	tr|O77425|O77425_DROME Ribokinase OS=Drosophila melanogaster OX=7227 GN=Dmel\CG13369 PE=2 SV=1	1	2	2	31.626	304	12.8	12.8	663710	1804200
Q9VKZ7;Q8MZ34	Nicalin	CG4972-RA;CG4972	tr|Q9VKZ7|Q9VKZ7_DROME Nicalin OS=Drosophila melanogaster OX=7227 GN=Dmel\CG4972 PE=1 SV=2;tr|Q8MZ34|Q8MZ34_DROME Nicalin OS=Drosophila melanogaster OX=7227 GN=CG4972 PE=2 SV=1	2	2	2	63.14	561	6.2	6.2	718770	1953600
A4UZC9;Q0E9C8;Q7JP00;Q24457;A0A126GUM1;A1Z8A4;Q7K0T7;Q9V5N1;Q7JN04;A1Z8A6		psq	tr|A4UZC9|A4UZC9_DROME Pipsqueak, isoform J OS=Drosophila melanogaster OX=7227 GN=psq PE=1 SV=1;tr|Q0E9C8|Q0E9C8_DROME Pipsqueak, isoform D OS=Drosophila melanogaster OX=7227 GN=psq PE=1 SV=1;tr|Q7JP00|Q7JP00_DROME PsqB OS=Drosophila melanogaster OX=7227 G	10	1	1	69.748	639	2.3	2.3	104680	284140
Q6NL44			tr|Q6NL44|Q6NL44_DROME GH28815p OS=Drosophila melanogaster OX=7227 GN=CG18238 PE=1 SV=1	1	3	3	53.622	478	9.2	9.2	1020000	2762400
Q8IQV9;A9YI14;A9YI11;A9YI10;A9YI09		Nup205	sp|Q8IQV9|NU205_DROME Nuclear pore complex protein Nup205 OS=Drosophila melanogaster OX=7227 GN=Nup205 PE=2 SV=1	5	12	12	235.14	2090	7	6.2	4391100	11869000
X5D3H6;A0A0B4KFL0;A0A0B4K851;C4IY22;A0A126GUM4;Q4Z8K6	Ran-binding proteins 9/10 homolog	RanBPM-RC;RanBPM;CG42236-RD	tr|X5D3H6|X5D3H6_DROME FI24005p1 OS=Drosophila melanogaster OX=7227 GN=RanBPM-RC PE=2 SV=1;tr|A0A0B4KFL0|A0A0B4KFL0_DROME Ran-binding protein M, isoform F OS=Drosophila melanogaster OX=7227 GN=RanBPM PE=1 SV=1;tr|A0A0B4K851|A0A0B4K851_DROME Ran-binding pro	6	2	2	66.42	598	7.7	7.7	351910	946720
A0A0B4LGA7;P27091	Protein 60A	gbb	tr|A0A0B4LGA7|A0A0B4LGA7_DROME Glass bottom boat, isoform B OS=Drosophila melanogaster OX=7227 GN=gbb PE=3 SV=1;sp|P27091|60A_DROME Protein 60A OS=Drosophila melanogaster OX=7227 GN=gbb PE=1 SV=1	2	3	3	51.687	455	7	7.3	1008500	2689800
Q9W3Q0;Q8SYS5		Rab39	tr|Q9W3Q0|Q9W3Q0_DROME FI07418p OS=Drosophila melanogaster OX=7227 GN=Rab39 PE=2 SV=1;tr|Q8SYS5|Q8SYS5_DROME RE37651p OS=Drosophila melanogaster OX=7227 GN=Rab39 PE=2 SV=1	2	3	2	24.704	218	12.4	17.4	343690	914720
Q9VC94			tr|Q9VC94|Q9VC94_DROME LD41803p OS=Drosophila melanogaster OX=7227 GN=Dmel\CG5728 PE=1 SV=2	1	1	1	159.8	1430	1	1	307260	811860
Q9VCW3;A1YK86;A1YK85;A1YK83;A1YK82;A1YK80;A1YK79;A1YK78;A1YK77;A1YK81		Nup133	sp|Q9VCW3|NU133_DROME Nuclear pore complex protein Nup133 OS=Drosophila melanogaster OX=7227 GN=Nup133 PE=2 SV=2;tr|A1YK86|A1YK86_DROME Nup133 OS=Drosophila melanogaster OX=7227 GN=Nup133 PE=4 SV=1;tr|A1YK85|A1YK85_DROME Nup133 OS=Drosophila melanogaster O	10	3	3	135.14	1200	2.7	1.9	324830	857350
O61345	Protein penguin	pen	sp|O61345|PENG_DROME Protein penguin OS=Drosophila melanogaster OX=7227 GN=peng PE=2 SV=1	1	2	2	81.301	737	5	3.7	312680	813490
Q9VTW1;Q9VTW0;X2JB05;X2JGL7;F0JAK0			tr|Q9VTW1|Q9VTW1_DROME RE15265p OS=Drosophila melanogaster OX=7227 GN=Sms PE=1 SV=1;tr|Q9VTW0|Q9VTW0_DROME GH19412p OS=Drosophila melanogaster OX=7227 GN=Sms PE=1 SV=1;tr|X2JB05|X2JB05_DROME Uncharacterized protein, isoform C OS=Drosophila melanogaster OX=	5	4	4	42.028	366	17.2	15.3	1286600	3334100
Q9V426		vig	tr|Q9V426|Q9V426_DROME LD07162p OS=Drosophila melanogaster OX=7227 GN=vig PE=1 SV=1	1	8	8	52.708	490	21	15.9	5414500	13970000
M9NDC3;O18388	Importin subunit beta	Fs(2)Ket	tr|M9NDC3|M9NDC3_DROME Female sterile (2) ketel, isoform B OS=Drosophila melanogaster OX=7227 GN=Fs(2)Ket PE=4 SV=1;sp|O18388|IMB_DROME Importin subunit beta OS=Drosophila melanogaster OX=7227 GN=Fs(2)Ket PE=1 SV=2	2	11	11	98.695	884	14.1	14.4	5620000	14484000
M9NDR2;M9PDL9;M9PDB8;P16568;D3DMV8	Protein bicaudal D	BicD;BicD-RA	tr|M9NDR2|M9NDR2_DROME Bicaudal D, isoform B OS=Drosophila melanogaster OX=7227 GN=BicD PE=1 SV=1;tr|M9PDL9|M9PDL9_DROME Bicaudal D, isoform C OS=Drosophila melanogaster OX=7227 GN=BicD PE=1 SV=1;tr|M9PDB8|M9PDB8_DROME Bicaudal D, isoform D OS=Drosophila m	5	6	6	85.532	750	8.4	12.1	1547400	3948900
Q9W0G4;Q8IH53		l(3)02640	tr|Q9W0G4|Q9W0G4_DROME FI03834p OS=Drosophila melanogaster OX=7227 GN=l(3)02640 PE=1 SV=1;tr|Q8IH53|Q8IH53_DROME GH12864p OS=Drosophila melanogaster OX=7227 GN=l(3)02640 PE=2 SV=1	2	2	2	68.899	652	6.4	3.7	147950	377480
Q9VNF3			tr|Q9VNF3|Q9VNF3_DROME RE01652p OS=Drosophila melanogaster OX=7227 GN=anon-WO0118547.83 PE=1 SV=1	1	8	7	26.918	257	33.5	45.5	5717400	14573000
P07486	Glyceraldehyde-3-phosphate dehydrogenase 1	Gapdh1	sp|P07486|G3P1_DROME Glyceraldehyde-3-phosphate dehydrogenase 1 OS=Drosophila melanogaster OX=7227 GN=Gapdh1 PE=2 SV=2	1	15	4	35.35	332	53	61.1	8882700	22541000
Q9VG04			tr|Q9VG04|Q9VG04_DROME LP04475p OS=Drosophila melanogaster OX=7227 GN=dMEMO PE=1 SV=1	1	2	2	33.234	295	10.8	10.8	819910	2067300
A0A0B4LFX4;A0A0B4LG23;Q9V8R9	Protein 4.1 homolog	cora	tr|A0A0B4LFX4|A0A0B4LFX4_DROME Coracle, isoform F OS=Drosophila melanogaster OX=7227 GN=cora PE=1 SV=1;tr|A0A0B4LG23|A0A0B4LG23_DROME Coracle, isoform G OS=Drosophila melanogaster OX=7227 GN=cora PE=1 SV=1;sp|Q9V8R9|41_DROME Protein 4.1 homolog OS=Drosophi	3	1	1	173.91	1600	1.2	1.2	115820	291740
M9MS45;B7Z098;Q9VNX8	Eukaryotic translation initiation factor 2A	CG7414	tr|M9MS45|M9MS45_DROME Eukaryotic translation initiation factor 2A OS=Drosophila melanogaster OX=7227 GN=Dmel\CG7414 PE=1 SV=1;tr|B7Z098|B7Z098_DROME Eukaryotic translation initiation factor 2A OS=Drosophila melanogaster OX=7227 GN=Dmel\CG7414 PE=1 SV=2;sp	3	2	2	61.327	555	4.9	2.5	277440	698480
Q9VZT2		CG14966-RA	tr|Q9VZT2|Q9VZT2_DROME RE68649p OS=Drosophila melanogaster OX=7227 GN=Dmel\CG14966 PE=2 SV=1	1	1	1	14.741	140	9.3	9.3	230710	580680
Q9NCC3	Sorting nexin	SH3PX1	tr|Q9NCC3|Q9NCC3_DROME Sorting nexin OS=Drosophila melanogaster OX=7227 GN=SH3PX1 PE=1 SV=1	1	7	7	63.166	565	15.4	16.3	2169500	5429000
Q7KU78;Q8MZI3			tr|Q7KU78|Q7KU78_DROME Uncharacterized protein, isoform C OS=Drosophila melanogaster OX=7227 GN=BcDNA:HL07910 PE=1 SV=1;tr|Q8MZI3|Q8MZI3_DROME GH10652p OS=Drosophila melanogaster OX=7227 GN=p90 PE=1 SV=1	2	5	2	51.157	472	13.1	13.1	1397400	3463400
Q9W3R7	Autophagy protein 5	Atg5	sp|Q9W3R7|ATG5_DROME Autophagy protein 5 OS=Drosophila melanogaster OX=7227 GN=Atg5 PE=1 SV=2	1	3	3	31.468	269	9.3	13	588290	1456200
M9PFB5;Q94899	COP9 signalosome complex subunit 2	alien	tr|M9PFB5|M9PFB5_DROME Alien, isoform D OS=Drosophila melanogaster OX=7227 GN=alien PE=4 SV=1;sp|Q94899|CSN2_DROME COP9 signalosome complex subunit 2 OS=Drosophila melanogaster OX=7227 GN=alien PE=1 SV=2	2	1	1	51.526	444	2.9	2.9	485280	1190800
Q9VV89;D2NUJ2;Q8IQP2;Q8IQP1		zetaCOP;zetaCOP-RA	tr|Q9VV89|Q9VV89_DROME Coat protein (Coatomer) zeta, isoform A OS=Drosophila melanogaster OX=7227 GN=zetaCOP PE=1 SV=2;tr|D2NUJ2|D2NUJ2_DROME MIP01145p (Fragment) OS=Drosophila melanogaster OX=7227 GN=zetaCOP-RA PE=2 SV=1;tr|Q8IQP2|Q8IQP2_DROME Coat protei	4	2	2	19.936	174	16.7	16.7	1233500	3015500
Q9U1H9	Nuclear RNA export factor 1	sbr	sp|Q9U1H9|NXF1_DROME Nuclear RNA export factor 1 OS=Drosophila melanogaster OX=7227 GN=sbr PE=1 SV=2	1	2	2	76.248	672	3.7	3.7	276830	669680
Q9V3E7		Ref1	tr|Q9V3E7|Q9V3E7_DROME LD24793p OS=Drosophila melanogaster OX=7227 GN=Ref1 PE=1 SV=1	1	6	6	27.851	266	19.9	25.2	4110600	9940000
Q9VUB9;Q8IGM3		CG6650	tr|Q9VUB9|Q9VUB9_DROME LD24362p OS=Drosophila melanogaster OX=7227 GN=anon-WO0172774.121 PE=1 SV=1;tr|Q8IGM3|Q8IGM3_DROME RE65359p OS=Drosophila melanogaster OX=7227 GN=CG6650 PE=2 SV=1	2	4	4	56.148	501	10.6	12.6	1440700	3479200
Q9VCB6;Q7K112;Q8MTZ5;Q8IMX1		twin	tr|Q9VCB6|Q9VCB6_DROME AT23187p OS=Drosophila melanogaster OX=7227 GN=twin PE=1 SV=2;tr|Q7K112|Q7K112_DROME LD18435p OS=Drosophila melanogaster OX=7227 GN=twin PE=1 SV=1;tr|Q8MTZ5|Q8MTZ5_DROME CCR4 (Fragment) OS=Drosophila melanogaster OX=7227 GN=twin PE=2	4	1	1	62.382	545	2.4	2.4	180800	435840
Q9W411;C1C3G9		CG15891-RA	tr|Q9W411|Q9W411_DROME Uncharacterized protein, isoform A OS=Drosophila melanogaster OX=7227 GN=CG32918 PE=1 SV=1;tr|C1C3G9|C1C3G9_DROME MIP04942p (Fragment) OS=Drosophila melanogaster OX=7227 GN=CG15891-RA PE=2 SV=1	2	1	1	16.362	149	11.4	11.4	188760	451010
Q960R6;L0CRT5;L0CRT0;L0CRH5;L0CR32;L0CR28;L0CPZ9;L0CPZ4;L0CPR4;A1ZAK9;A1ZAK7;A1ZAK8		Psi	tr|Q960R6|Q960R6_DROME LD38872p OS=Drosophila melanogaster OX=7227 GN=Psi PE=2 SV=1;tr|L0CRT5|L0CRT5_DROME p-element somatic inhibitor OS=Drosophila melanogaster OX=7227 GN=Psi PE=4 SV=1;tr|L0CRT0|L0CRT0_DROME p-element somatic inhibitor OS=Drosophila mela	12	4	2	68.617	661	8	6.1	1693400	4032600
P42325	Neurocalcin homolog	Nca	sp|P42325|NCAH_DROME Neurocalcin homolog OS=Drosophila melanogaster OX=7227 GN=Nca PE=1 SV=2	1	1	1	21.894	190	5.8	5.8	281050	660960
C0PTV9;Q24323	Semaphorin-2A	Sema-2a-RA;Sema-2a	tr|C0PTV9|C0PTV9_DROME RT01502p (Fragment) OS=Drosophila melanogaster OX=7227 GN=Sema-2a-RA PE=2 SV=1;sp|Q24323|SEM2A_DROME Semaphorin-2A OS=Drosophila melanogaster OX=7227 GN=Sema2a PE=1 SV=2	2	2	2	80.428	699	5.7	5.7	442900	1027600
Q9VV41	Probable tRNA N6-adenosine threonylcarbamoyltransferase	CG4933	sp|Q9VV41|OSGEP_DROME Probable tRNA N6-adenosine threonylcarbamoyltransferase OS=Drosophila melanogaster OX=7227 GN=Tcs3 PE=2 SV=1	1	1	1	38.486	347	3.5	3.5	207080	476900
Q9VU84	Drebrin-like protein	Abp1	sp|Q9VU84|DBNL_DROME Drebrin-like protein OS=Drosophila melanogaster OX=7227 GN=Abp1 PE=1 SV=1	1	3	3	58.729	531	7.2	9.8	1491700	3435200
Q9VH77	Mannose-6-phosphate isomerase		tr|Q9VH77|Q9VH77_DROME Mannose-6-phosphate isomerase OS=Drosophila melanogaster OX=7227 GN=Mpi PE=1 SV=1	1	2	2	44.774	396	7.1	4.5	213460	490450
Q8T3K2;Q0KHR5;Q9VX92		RhoGAP15B	tr|Q8T3K2|Q8T3K2_DROME SD08167p OS=Drosophila melanogaster OX=7227 GN=RhoGAP15B PE=2 SV=1;tr|Q0KHR5|Q0KHR5_DROME Rho GTPase activating protein at 15B, isoform B OS=Drosophila melanogaster OX=7227 GN=RhoGAP15B PE=1 SV=1;tr|Q9VX92|Q9VX92_DROME Rho GTPase act	3	3	3	139.05	1226	3.6	3.6	426930	977210
A0A0B7P9G0		uex	tr|A0A0B7P9G0|A0A0B7P9G0_DROME Unextended, isoform E OS=Drosophila melanogaster OX=7227 GN=uex PE=1 SV=1	1	1	1	93.282	834	2.8	2.8	454800	1040800
Q9VNI4			tr|Q9VNI4|Q9VNI4_DROME GH13924p OS=Drosophila melanogaster OX=7227 GN=Dmel\CG2046 PE=1 SV=1	1	2	2	25.782	235	12.8	12.8	560380	1281500
Q7JVP2;M9PF85		Rcd-1	tr|Q7JVP2|Q7JVP2_DROME GH15157p OS=Drosophila melanogaster OX=7227 GN=Rcd-1 PE=1 SV=1;tr|M9PF85|M9PF85_DROME Required for cell differentiation 1, isoform C OS=Drosophila melanogaster OX=7227 GN=Rcd-1 PE=1 SV=1	2	2	2	34.204	304	10.5	5.9	530500	1206800
Q9VYT5;F6J1V2;F6J1V1;A9YGM1;A9YGL4;A9YGL3;A9YGL2			tr|Q9VYT5|Q9VYT5_DROME LD06533p OS=Drosophila melanogaster OX=7227 GN=Dmel\CG10347 PE=1 SV=1	7	5	5	65.375	580	7.8	10.7	755950	1718800
Q9VQE0;Q8IHG0;Q8T9L0		Drp1	tr|Q9VQE0|Q9VQE0_DROME Dynamin related protein 1, isoform A OS=Drosophila melanogaster OX=7227 GN=Drp1 PE=1 SV=1;tr|Q8IHG0|Q8IHG0_DROME AT04516p OS=Drosophila melanogaster OX=7227 GN=Drp1 PE=2 SV=1	3	17	17	82.565	735	22.3	25.2	5235400	11877000
A1Z8U0;Q960V2;Q6NLN4		Prp8	tr|A1Z8U0|A1Z8U0_DROME Pre-mRNA processing factor 8 OS=Drosophila melanogaster OX=7227 GN=Prp8 PE=1 SV=1;tr|Q960V2|Q960V2_DROME LD33339p OS=Drosophila melanogaster OX=7227 GN=Prp8 PE=2 SV=1	3	4	4	279.57	2396	2.8	0.9	747260	1689000
A1Z7X7;H0RNE2;Q4V5M6		GstT2;CG30005-RA;CG30005	tr|A1Z7X7|A1Z7X7_DROME Glutathione S transferase T2 OS=Drosophila melanogaster OX=7227 GN=GstT2 PE=1 SV=2;tr|H0RNE2|H0RNE2_DROME FI16621p1 (Fragment) OS=Drosophila melanogaster OX=7227 GN=CG30005-RA PE=2 SV=1;tr|Q4V5M6|Q4V5M6_DROME IP06876p1 OS=Drosophila	3	4	4	26.614	228	21.9	28.1	1048400	2367900
Q8SXQ5			tr|Q8SXQ5|Q8SXQ5_DROME Glutaredoxin OS=Drosophila melanogaster OX=7227 GN=BcDNA:RH03087 PE=1 SV=1	1	4	4	17.668	159	20.1	27.7	4254200	9578300
Q9W229	40S ribosomal protein S24	RpS24	tr|Q9W229|Q9W229_DROME 40S ribosomal protein S24 OS=Drosophila melanogaster OX=7227 GN=RpS24 PE=1 SV=1	1	6	6	15.048	131	38.9	39.7	14027000	31373000
A0A1B2AIW8;Q9VYX1	Enhancer of yellow 2 transcription factor	e(y)2	tr|A0A1B2AIW8|A0A1B2AIW8_DROME GEO10093p1 (Fragment) OS=Drosophila melanogaster OX=7227 PE=2 SV=1;sp|Q9VYX1|ENY2_DROME Enhancer of yellow 2 transcription factor OS=Drosophila melanogaster OX=7227 GN=e(y)2 PE=1 SV=1	2	1	1	11.474	101	17.8	17.8	141600	313500
Q9W074;Q86NR4		HBS1	tr|Q9W074|Q9W074_DROME FI04779p OS=Drosophila melanogaster OX=7227 GN=HBS1 PE=1 SV=2;tr|Q86NR4|Q86NR4_DROME RE29053p OS=Drosophila melanogaster OX=7227 GN=HBS1 PE=2 SV=1	2	1	1	74.164	670	2.1	2.1	434540	961940
M9PGB6;Q9VP29			tr|M9PGB6|M9PGB6_DROME Uncharacterized protein, isoform B OS=Drosophila melanogaster OX=7227 GN=Dmel\CG7519 PE=1 SV=1;tr|Q9VP29|Q9VP29_DROME RE39629p OS=Drosophila melanogaster OX=7227 GN=Dmel\CG7519 PE=1 SV=1	2	4	4	17.602	151	28.5	27.8	911230	2014400
Q9Y1B2	Origin recognition complex subunit 6	Orc6	sp|Q9Y1B2|ORC6_DROME Origin recognition complex subunit 6 OS=Drosophila melanogaster OX=7227 GN=Orc6 PE=1 SV=2	1	1	1	29.239	257	3.9	3.9	20559	45318
Q8SXE5;A1Z803;A8E6Y3		CG1665;CG1665-RA	tr|Q8SXE5|Q8SXE5_DROME RH59033p OS=Drosophila melanogaster OX=7227 GN=Marc PE=2 SV=1;tr|A1Z803|A1Z803_DROME FI02892p OS=Drosophila melanogaster OX=7227 GN=Marc PE=1 SV=1;tr|A8E6Y3|A8E6Y3_DROME IP19920p (Fragment) OS=Drosophila melanogaster OX=7227 GN=CG166	3	4	4	38.135	340	11.5	15.3	1423500	3126000
Q9VZE4			tr|Q9VZE4|Q9VZE4_DROME RE70333p OS=Drosophila melanogaster OX=7227 GN=Dmel\CG1316 PE=1 SV=2	1	1	1	52.452	470	3.4	3.4	302310	663170
Q9W3M7			tr|Q9W3M7|Q9W3M7_DROME LD32873p OS=Drosophila melanogaster OX=7227 GN=mahe PE=1 SV=1	1	9	7	100.42	945	12.3	14.6	3090300	6768200
Q9VLQ1	Dolichyl-phosphate beta-glucosyltransferase	wol	sp|Q9VLQ1|ALG5_DROME Dolichyl-phosphate beta-glucosyltransferase OS=Drosophila melanogaster OX=7227 GN=wol PE=1 SV=1	1	1	1	37.081	326	7.4	7.4	522210	1138100
X2JC82;P02518	Heat shock protein 27	Hsp27	tr|X2JC82|X2JC82_DROME Heat shock protein 27, isoform B OS=Drosophila melanogaster OX=7227 GN=Hsp27 PE=3 SV=1;sp|P02518|HSP27_DROME Heat shock protein 27 OS=Drosophila melanogaster OX=7227 GN=Hsp27 PE=1 SV=2	2	7	7	23.616	213	32.9	42.3	6115000	13291000
M9PE14;Q9W021	39S ribosomal protein L23, mitochondrial	mRpL23	tr|M9PE14|M9PE14_DROME Mitochondrial ribosomal protein L23, isoform C OS=Drosophila melanogaster OX=7227 GN=mRpL23 PE=4 SV=1;sp|Q9W021|RM23_DROME 39S ribosomal protein L23, mitochondrial OS=Drosophila melanogaster OX=7227 GN=mRpL23 PE=2 SV=1	2	1	1	17.877	150	8.7	8.7	141300	306670
Q8IP63;O97183		RpII33	tr|Q8IP63|Q8IP63_DROME RH25219p OS=Drosophila melanogaster OX=7227 GN=RpII33 PE=2 SV=2;tr|O97183|O97183_DROME GH07456p OS=Drosophila melanogaster OX=7227 GN=RpII33 PE=1 SV=1	2	1	1	13.099	117	12	12	656380	1417100
Q9VUV9	Putative U5 small nuclear ribonucleoprotein 200 kDa helicase	l(3)72Ab	sp|Q9VUV9|U520_DROME Putative U5 small nuclear ribonucleoprotein 200 kDa helicase OS=Drosophila melanogaster OX=7227 GN=l(3)72Ab PE=2 SV=4	1	9	9	244.51	2142	5.1	4.8	1655100	3568800
A1Z6J5		Tbce	sp|A1Z6J5|TBCE_DROME Tubulin-specific chaperone E OS=Drosophila melanogaster OX=7227 GN=Tbce PE=1 SV=1	1	4	4	59.423	523	14.3	14.3	1702100	3662100
Q8SYL1		l(2)09851	tr|Q8SYL1|Q8SYL1_DROME Lethal (2) 09851, isoform A OS=Drosophila melanogaster OX=7227 GN=l(2)09851 PE=1 SV=1	1	9	9	50.683	456	36.6	34.4	7306000	15634000
A0A0B4LGJ4;O96692;Q95SU2		Rap2l	tr|A0A0B4LGJ4|A0A0B4LGJ4_DROME Ras-associated protein 2-like, isoform C OS=Drosophila melanogaster OX=7227 GN=Rap2l PE=1 SV=1;tr|O96692|O96692_DROME RE63021p OS=Drosophila melanogaster OX=7227 GN=Rap2l PE=1 SV=1;tr|Q95SU2|Q95SU2_DROME SD07888p OS=Drosophil	3	2	2	13.23	116	31	31	690600	1477100
D8FT20;Q8I0S6;Q9VPG5;Q9VPG4;Q6IDG4;M9NDE0;Q9NHN2		fbl	tr|D8FT20|D8FT20_DROME Fumble, isoform F OS=Drosophila melanogaster OX=7227 GN=fbl PE=1 SV=1;tr|Q8I0S6|Q8I0S6_DROME AT20009p OS=Drosophila melanogaster OX=7227 GN=fbl PE=1 SV=1;tr|Q9VPG5|Q9VPG5_DROME Fumble, isoform B OS=Drosophila melanogaster OX=7227 GN=	7	1	1	37.672	342	5.8	5.8	163750	350200
Q8SXD0;Q5KU10;G4LU22;Q9VJ59		Jwa;dp22;CG10373-RA	tr|Q8SXD0|Q8SXD0_DROME PRA1 family protein OS=Drosophila melanogaster OX=7227 GN=Jwa PE=2 SV=1;tr|Q5KU10|Q5KU10_DROME PRA1 family protein OS=Drosophila melanogaster OX=7227 GN=dp22 PE=2 SV=1;tr|G4LU22|G4LU22_DROME PRA1 family protein OS=Drosophila melanoga	4	3	3	21.996	197	23.4	23.4	4346200	9236600
Q8IRE4	tRNA (guanine(37)-N1)-methyltransferase	CG32281	sp|Q8IRE4|TRM5_DROME tRNA (guanine(37)-N1)-methyltransferase OS=Drosophila melanogaster OX=7227 GN=CG32281 PE=2 SV=2	1	3	3	53.074	457	10.3	7.2	688240	1462100
Q9W3N6;A9YJR6;A9YJR4		p115	sp|Q9W3N6|USO1_DROME General vesicular transport factor p115 OS=Drosophila melanogaster OX=7227 GN=p115 PE=1 SV=2	3	8	8	92.068	836	12.1	11.4	2459100	5213100
A0A0B4K6B8;A0A0B4K7A6;C7LAE7;Q86B87	Modifier of mdg4	mod(mdg4);mod(mdg4)-RD	tr|A0A0B4K6B8|A0A0B4K6B8_DROME Modifier of mdg4, isoform AE OS=Drosophila melanogaster OX=7227 GN=mod(mdg4) PE=1 SV=1;tr|A0A0B4K7A6|A0A0B4K7A6_DROME Modifier of mdg4, isoform AD OS=Drosophila melanogaster OX=7227 GN=mod(mdg4) PE=1 SV=1;tr|C7LAE7|C7LAE7_DRO	4	3	3	52.406	479	6.9	6.5	1063800	2253200
L0CQE1;L0CP25;L0CQF8;L0CQT0;L0CQR4;L0CR21;L0CR15;L0CP93;L0CP48;L0CP19;L0CQD5;L0CPB0;L0CP86;L0CP31;Q7KMH5		CG8378;BcDNA.LD29892	tr|L0CQE1|L0CQE1_DROME CG8378 (Fragment) OS=Drosophila melanogaster OX=7227 GN=CG8378 PE=4 SV=1;tr|L0CP25|L0CP25_DROME CG8378 (Fragment) OS=Drosophila melanogaster OX=7227 GN=CG8378 PE=4 SV=1;tr|L0CQF8|L0CQF8_DROME CG8378 (Fragment) OS=Drosophila melanogas	15	4	4	63.149	553	10.7	10.7	1469700	3107900
P02572	Actin-42A	Act42A	sp|P02572|ACT2_DROME Actin-42A OS=Drosophila melanogaster OX=7227 GN=Act42A PE=1 SV=3	1	25	3	41.823	376	68.1	69.9	16405000	34685000
Q9W3H5			tr|Q9W3H5|Q9W3H5_DROME GEO04367p1 OS=Drosophila melanogaster OX=7227 GN=BcDNA:LP02728 PE=1 SV=1	1	1	1	17.157	165	8.5	8.5	997700	2101900
O77434;M9PGI6;A0A3Q7YTS9		Sec22	tr|O77434|O77434_DROME EG:34F3.8 protein OS=Drosophila melanogaster OX=7227 GN=Sec22 PE=1 SV=2;tr|M9PGI6|M9PGI6_DROME Secretory 22, isoform B OS=Drosophila melanogaster OX=7227 GN=Sec22 PE=1 SV=1;tr|A0A3Q7YTS9|A0A3Q7YTS9_DROME CG7359 (Fragment) OS=Drosophi	3	4	4	24.646	211	25.1	25.1	2576700	5419500
Q24145	Tyrosine-protein kinase shark	shark	sp|Q24145|SHARK_DROME Tyrosine-protein kinase Shark OS=Drosophila melanogaster OX=7227 GN=Shark PE=1 SV=2	1	3	3	104.27	939	4.3	3.7	461950	967310
Q9VNE2	Protein krasavietz	kra	sp|Q9VNE2|PKRA_DROME Protein krasavietz OS=Drosophila melanogaster OX=7227 GN=kra PE=1 SV=1	1	10	10	49.224	422	22.3	23	10027000	20939000
Q8IML5;Q86M57;Q8IML3;Q8IML4;Q6NLA3;Q9XZ10;Q86P41;N0A2P0	V-type proton ATPase subunit a	Vha100-1	tr|Q8IML5|Q8IML5_DROME V-type proton ATPase subunit a OS=Drosophila melanogaster OX=7227 GN=Vha100-1 PE=1 SV=1;tr|Q86M57|Q86M57_DROME V-type proton ATPase subunit a OS=Drosophila melanogaster OX=7227 GN=Vha100-1 PE=2 SV=1;tr|Q8IML3|Q8IML3_DROME V-type prot	8	8	8	94.676	833	7.6	10.7	5591400	11645000
Q8SX32		Art8	tr|Q8SX32|Q8SX32_DROME Arginine methyltransferase 8 OS=Drosophila melanogaster OX=7227 GN=Art8 PE=1 SV=1	1	3	3	38.482	341	10.3	14.1	886480	1841000
A0A0B4LFK8;Q95YG3;A1ZAW0;Q6NP57;Q2Q3W0;Q2Q3W1;Q2Q3V9;Q2Q3V7;Q2Q3V6;Q2Q3V5;Q2Q3V4;Q2Q3V8		Dcr-2;Dcr-2-RA	tr|A0A0B4LFK8|A0A0B4LFK8_DROME Dicer-2, isoform B OS=Drosophila melanogaster OX=7227 GN=Dcr-2 PE=1 SV=1;tr|Q95YG3|Q95YG3_DROME Double-strand-specific ribonuclease OS=Drosophila melanogaster OX=7227 GN=Dcr-2 PE=2 SV=1;tr|A1ZAW0|A1ZAW0_DROME Dicer-2, isoform	12	15	15	197.71	1721	9.6	12.5	23911000	49433000
Q9VW41;Q7KUT5;B5X542		CG15881-RA	tr|Q9VW41|Q9VW41_DROME FI17101p1 OS=Drosophila melanogaster OX=7227 GN=Ccdc58 PE=1 SV=2;tr|Q7KUT5|Q7KUT5_DROME HL01254p OS=Drosophila melanogaster OX=7227 GN=Ccdc58 PE=1 SV=1;tr|B5X542|B5X542_DROME RE02456p OS=Drosophila melanogaster OX=7227 GN=CG15881-RA	3	3	3	15.808	136	23.5	25.7	555700	1147500
Q9Y1L3;Q9VPL6;M9NEL3;M9NDB7;Q9VPL9;M9NCY5;B7Z002;M9WDW6;Q6NP08		kis;kis-RA	tr|Q9Y1L3|Q9Y1L3_DROME Kismet OS=Drosophila melanogaster OX=7227 GN=kis PE=2 SV=1;tr|Q9VPL6|Q9VPL6_DROME Kismet, isoform B OS=Drosophila melanogaster OX=7227 GN=kis PE=1 SV=1;tr|M9NEL3|M9NEL3_DROME Kismet, isoform F OS=Drosophila melanogaster OX=7227 GN=ki	9	4	4	224.8	2151	2.4	2.4	800910	1651100
Q9VPR4	Protein Notchless	Nle	sp|Q9VPR4|NLE_DROME Protein Notchless OS=Drosophila melanogaster OX=7227 GN=Nle PE=1 SV=2	1	3	3	53.809	488	10.2	15	750670	1545600
Q9VGK3	Peptidyl-prolyl cis-trans isomerase		tr|Q9VGK3|Q9VGK3_DROME Peptidylprolyl isomerase OS=Drosophila melanogaster OX=7227 GN=BcDNA:RH50927 PE=1 SV=1	1	6	6	14.784	138	38.4	49.3	5370100	11033000
Q9VUR0	Probable Ufm1-specific protease 2	UFSP2	sp|Q9VUR0|UFSP2_DROME Probable Ufm1-specific protease 2 OS=Drosophila melanogaster OX=7227 GN=UFSP2 PE=2 SV=1	1	6	6	68.25	607	13.8	16.6	2364000	4838600
Q9VNV3	ATP-dependent RNA helicase Ddx1	Ddx1	sp|Q9VNV3|DDX1_DROME ATP-dependent RNA helicase Ddx1 OS=Drosophila melanogaster OX=7227 GN=Ddx1 PE=2 SV=1	1	4	4	80.869	727	5.2	7.3	1505800	3081300
Q9VH72;Q8SWZ8		CG9471-RA;CG9471	tr|Q9VH72|Q9VH72_DROME TA01656p1 OS=Drosophila melanogaster OX=7227 GN=Dmel\CG9471 PE=1 SV=1;tr|Q8SWZ8|Q8SWZ8_DROME RH49505p OS=Drosophila melanogaster OX=7227 GN=CG9471 PE=2 SV=1	2	5	5	22.713	204	29.4	29.9	1531700	3123800
O61613	Glycylpeptide N-tetradecanoyltransferase	Nmt	sp|O61613|NMT_DROME Glycylpeptide N-tetradecanoyltransferase OS=Drosophila melanogaster OX=7227 GN=Nmt PE=2 SV=2	1	5	5	53.832	472	13.8	13.1	1905500	3880300
F8VAB5;C7DZL0;P84345	ATP synthase protein 8	ATP8;mt:ATPase8	tr|F8VAB5|F8VAB5_DROME ATPase 8 (Fragment) OS=Drosophila melanogaster OX=7227 GN=ATP8 PE=4 SV=1;tr|C7DZL0|C7DZL0_DROME ATP synthase protein 8 OS=Drosophila melanogaster OX=7227 GN=ATP8 PE=2 SV=1;sp|P84345|ATP8_DROME ATP synthase protein 8 OS=Drosophila mel	3	1	1	3.5369	29	34.5	34.5	659410	1340400
M9MRT6;P08645	Ras-like protein 3	R	tr|M9MRT6|M9MRT6_DROME Rap1 GTPase, isoform B OS=Drosophila melanogaster OX=7227 GN=Rap1 PE=4 SV=1;sp|P08645|RAP1_DROME Ras-related protein Rap1 OS=Drosophila melanogaster OX=7227 GN=Rap1 PE=2 SV=2	2	5	5	20.863	184	35.3	38	8157800	16541000
Q9VMX4		Scox	tr|Q9VMX4|Q9VMX4_DROME AT19154p OS=Drosophila melanogaster OX=7227 GN=Scox PE=1 SV=1	1	1	1	28.175	251	6	6	342490	694100
D6W4V2;D3DN23;Q7KVH7;T2GGE7;A0A0B4K7M9;A0A0F7J3E9;Q27237	Protein tumorous imaginal discs, mitochondrial	l(2)tid-RC;l(2)tid-RA;l(2)tid	tr|D6W4V2|D6W4V2_DROME UT01205p OS=Drosophila melanogaster OX=7227 GN=l(2)tid-RC PE=2 SV=1;tr|D3DN23|D3DN23_DROME GH23452p OS=Drosophila melanogaster OX=7227 GN=l(2)tid-RA PE=1 SV=1;tr|Q7KVH7|Q7KVH7_DROME Lethal (2) tumorous imaginal discs, isoform C OS=Dr	7	2	2	56.262	507	9.3	4.7	1069900	2168100
A0A0B4K6K7;Q9VI55	E3 UFM1-protein ligase 1 homolog	CG1104	tr|A0A0B4K6K7|A0A0B4K6K7_DROME UFM1 specific ligase 1, isoform C OS=Drosophila melanogaster OX=7227 GN=Ufl1 PE=4 SV=1;sp|Q9VI55|UFL1_DROME E3 UFM1-protein ligase 1 homolog OS=Drosophila melanogaster OX=7227 GN=Ufl1 PE=2 SV=1	2	6	6	87.481	782	14.2	12.5	1410800	2857000
Q9VDD0			tr|Q9VDD0|Q9VDD0_DROME RE75113p OS=Drosophila melanogaster OX=7227 GN=Smyd5 PE=1 SV=2	1	2	2	45.104	393	10.7	10.7	596130	1202000
Q9V3Y4		Mtch	tr|Q9V3Y4|Q9V3Y4_DROME LD43650p OS=Drosophila melanogaster OX=7227 GN=Mtch PE=1 SV=1	1	3	3	35.011	316	8.9	13.3	1271700	2545500
Q9VG51		Snx3	tr|Q9VG51|Q9VG51_DROME RE52028p OS=Drosophila melanogaster OX=7227 GN=Snx3 PE=1 SV=1	1	3	3	19.436	167	25.7	17.4	410570	819100
Q7KAK2;Q7KN61		Fpps	tr|Q7KAK2|Q7KAK2_DROME Farnesyl pyrophosphate synthase (Dimethylallyltransferase) (Fragment) OS=Drosophila melanogaster OX=7227 GN=Fpps PE=2 SV=1;tr|Q7KN61|Q7KN61_DROME Farnesyl pyrophosphate synthase OS=Drosophila melanogaster OX=7227 GN=Fpps PE=1 SV=1	2	3	3	43.442	380	11.8	11.8	1541900	3060100
A0A0B4KHL7;A0A0B4KGN2;P91928	MICOS complex subunit Mic60	CG6455	tr|A0A0B4KHL7|A0A0B4KHL7_DROME MICOS complex subunit MIC60 OS=Drosophila melanogaster OX=7227 GN=Mitofilin PE=3 SV=1;tr|A0A0B4KGN2|A0A0B4KGN2_DROME MICOS complex subunit MIC60 OS=Drosophila melanogaster OX=7227 GN=Mitofilin PE=3 SV=1;sp|P91928|MIC60_DROME	3	2	2	82.013	739	4.1	1.9	1042700	2063900
Q9V9M7		RpL21	tr|Q9V9M7|Q9V9M7_DROME RE62581p OS=Drosophila melanogaster OX=7227 GN=RpL21 PE=1 SV=1	1	9	9	18.476	159	39	41.5	18990000	37536000
A4V4I0;P26308	Guanine nucleotide-binding protein subunit beta-1	Gbeta13F	tr|A4V4I0|A4V4I0_DROME G protein beta-subunit 13F, isoform C OS=Drosophila melanogaster OX=7227 GN=Gbeta13F PE=1 SV=1;sp|P26308|GBB1_DROME Guanine nucleotide-binding protein subunit beta-1 OS=Drosophila melanogaster OX=7227 GN=Gbeta13F PE=1 SV=1	2	8	8	37.133	340	30	29.1	7207000	14161000
Q7K172		ste24a	tr|Q7K172|Q7K172_DROME CAAX prenyl protease OS=Drosophila melanogaster OX=7227 GN=ste24a PE=1 SV=1	1	7	7	51.639	451	14.9	17.5	5450900	10669000
O44116;A1Z6S6;A1Z6S7;Q86LF4;Q8T996;Q9V3N4;Q9U999		vimar	tr|O44116|O44116_DROME Vimar OS=Drosophila melanogaster OX=7227 GN=vimar PE=2 SV=1;tr|A1Z6S6|A1Z6S6_DROME RE54322p OS=Drosophila melanogaster OX=7227 GN=vimar PE=1 SV=1;tr|A1Z6S7|A1Z6S7_DROME FI02061p OS=Drosophila melanogaster OX=7227 GN=vimar PE=1 SV=1;t	7	9	9	70.237	634	14.7	20.7	2851100	5543500
M9PG47;P13008	40S ribosomal protein S26	RpS26	tr|M9PG47|M9PG47_DROME 40S ribosomal protein S26 OS=Drosophila melanogaster OX=7227 GN=RpS26 PE=3 SV=1;sp|P13008|RS26_DROME 40S ribosomal protein S26 OS=Drosophila melanogaster OX=7227 GN=RpS26 PE=1 SV=1	2	4	4	13.266	114	31.6	37.7	14505000	28195000
Q8IHB4;Q7YWB4;Q7K221;A1ZAA5		Got1	tr|Q8IHB4|Q8IHB4_DROME AT16867p (Fragment) OS=Drosophila melanogaster OX=7227 GN=Got1 PE=2 SV=1;tr|Q7YWB4|Q7YWB4_DROME Aminotransferase OS=Drosophila melanogaster OX=7227 GN=Got1 PE=2 SV=1;tr|Q7K221|Q7K221_DROME Glutamate oxaloacetate transaminase 1, isofo	4	9	9	49.765	448	33.7	35.7	6505400	12641000
Q9VHN1	Cyclin-dependent kinases regulatory subunit	Cks85A	tr|Q9VHN1|Q9VHN1_DROME Cyclin-dependent kinases regulatory subunit OS=Drosophila melanogaster OX=7227 GN=Cks85A PE=1 SV=1	1	1	1	10.957	96	24	24	183030	354260
O97118;A1A6X4;Q9W0A8;Q0ZHI2;Q8SX05		RpL23A;RpL23a	tr|O97118|O97118_DROME Ribosomal protein L23a (Fragment) OS=Drosophila melanogaster OX=7227 GN=RpL23A PE=2 SV=1;tr|A1A6X4|A1A6X4_DROME IP17216p (Fragment) OS=Drosophila melanogaster OX=7227 GN=RpL23a PE=2 SV=1;tr|Q9W0A8|Q9W0A8_DROME FI01658p OS=Drosophila	5	11	11	28.626	269	31.6	28.6	105400000	202830000
Q9VC18;Q95RT1		CG11089	tr|Q9VC18|Q9VC18_DROME RE29555p OS=Drosophila melanogaster OX=7227 GN=BEST:GH11240 PE=1 SV=1;tr|Q95RT1|Q95RT1_DROME LD12501p OS=Drosophila melanogaster OX=7227 GN=CG11089 PE=2 SV=1	2	10	10	63.323	590	17.8	24.6	3286500	6310400
Q7JWD3;Q8IH28	ATPase ASNA1 homolog	CG1598	sp|Q7JWD3|ASNA_DROME ATPase ASNA1 homolog OS=Drosophila melanogaster OX=7227 GN=CG1598 PE=2 SV=1;tr|Q8IH28|Q8IH28_DROME GM18141p OS=Drosophila melanogaster OX=7227 GN=CG1598 PE=2 SV=1	2	3	3	37.581	336	14	7.7	1197600	2294000
Q7K4L8			tr|Q7K4L8|Q7K4L8_DROME LD33749p OS=Drosophila melanogaster OX=7227 GN=Dmel\CG7878 PE=1 SV=1	1	7	6	78.567	703	15.1	15.1	3589600	6867800
M9NFF8;P40793	Cdc42 homolog	Cdc42	tr|M9NFF8|M9NFF8_DROME Cdc42, isoform C OS=Drosophila melanogaster OX=7227 GN=Cdc42 PE=4 SV=1;sp|P40793|CDC42_DROME Cdc42 homolog OS=Drosophila melanogaster OX=7227 GN=Cdc42 PE=1 SV=1	2	6	5	21.403	191	26.7	31.9	5329300	10133000
M9PF40;Q9VTE5	Probable prefoldin subunit 2	l(3)01239	tr|M9PF40|M9PF40_DROME Prefoldin 2, isoform B OS=Drosophila melanogaster OX=7227 GN=Pfdn2 PE=4 SV=1;sp|Q9VTE5|PFD2_DROME Probable prefoldin subunit 2 OS=Drosophila melanogaster OX=7227 GN=Pfdn2 PE=2 SV=1	2	8	8	16.203	143	39.9	58	7260600	13800000
X2JDU0;P50882	60S ribosomal protein L9	RpL9	tr|X2JDU0|X2JDU0_DROME Ribosomal protein L9, isoform C OS=Drosophila melanogaster OX=7227 GN=RpL9 PE=4 SV=1;sp|P50882|RL9_DROME 60S ribosomal protein L9 OS=Drosophila melanogaster OX=7227 GN=RpL9 PE=1 SV=2	2	7	7	21.392	190	42.6	42.6	20289000	38489000
Q9W5E4;Q24034;O77426		l(1)1Bi;EG:115C2.2	sp|Q9W5E4|MBB1A_DROME Myb-binding protein 1A OS=Drosophila melanogaster OX=7227 GN=Mybbp1A PE=1 SV=1;tr|Q24034|Q24034_DROME Lethal(1)1Bi protein OS=Drosophila melanogaster OX=7227 GN=Mybbp1A PE=4 SV=1;tr|O77426|O77426_DROME EG:115C2.2 protein (Fbgn0001341;	3	9	9	127.87	1133	10.3	6.7	2701600	5107000
Q24317	DNA primase small subunit	DNApol-alpha50	sp|Q24317|PRI1_DROME DNA primase small subunit OS=Drosophila melanogaster OX=7227 GN=DNApol-alpha50 PE=2 SV=2	1	2	2	50.221	438	7.1	2.3	164110	309010
A0A1B2AL76;Q9VTC4;Q29QJ3	MIP18 family protein CG7949	CG7949	tr|A0A1B2AL76|A0A1B2AL76_DROME GEO01303p1 (Fragment) OS=Drosophila melanogaster OX=7227 PE=2 SV=1;sp|Q9VTC4|GALL2_DROME MIP18 family protein galla-2 OS=Drosophila melanogaster OX=7227 GN=galla-2 PE=1 SV=1;tr|Q29QJ3|Q29QJ3_DROME IP05061p (Fragment) OS=Droso	3	4	4	17.587	156	41.7	41.7	1873600	3527800
F6J1D0;P40423	Myosin regulatory light chain sqh	sqh	tr|F6J1D0|F6J1D0_DROME CG3595 OS=Drosophila melanogaster OX=7227 GN=sqh PE=1 SV=1;sp|P40423|SQH_DROME Myosin regulatory light chain sqh OS=Drosophila melanogaster OX=7227 GN=sqh PE=1 SV=1	2	5	5	19.954	174	36.2	36.2	4216600	7933200
C6SUY3;Q9V461	DNA helicase;DNA replication licensing factor Mcm6	Mcm6-RA;Mcm6	tr|C6SUY3|C6SUY3_DROME DNA helicase OS=Drosophila melanogaster OX=7227 GN=Mcm6-RA PE=2 SV=1;sp|Q9V461|MCM6_DROME DNA replication licensing factor Mcm6 OS=Drosophila melanogaster OX=7227 GN=Mcm6 PE=1 SV=1	2	8	8	92.352	817	9.3	11.4	6679000	12538000
Q95S39		CG15611	tr|Q95S39|Q95S39_DROME GM09915p OS=Drosophila melanogaster OX=7227 GN=CG15611 PE=2 SV=1	1	5	1	51.988	452	17	18.6	1399600	2620500
Q9VFI3			tr|Q9VFI3|Q9VFI3_DROME GEO08281p1 OS=Drosophila melanogaster OX=7227 GN=Dmel\CG8066 PE=1 SV=1	1	5	5	11.339	104	67.3	67.3	2105400	3904000
A0A0B4LFP4;A8DYH2	Ubiquitin-fold modifier 1	CG34191	tr|A0A0B4LFP4|A0A0B4LFP4_DROME Ubiquitin-fold modifier 1 OS=Drosophila melanogaster OX=7227 GN=Ufm1 PE=3 SV=1;sp|A8DYH2|UFM1_DROME Ubiquitin-fold modifier 1 OS=Drosophila melanogaster OX=7227 GN=Ufm1 PE=1 SV=1	2	2	2	9.4378	87	57.5	57.5	2772800	5136500
M9PBP5;Q9VQ57	Derlin-1	Der-1	tr|M9PBP5|M9PBP5_DROME Derlin OS=Drosophila melanogaster OX=7227 GN=Der-1 PE=3 SV=1;sp|Q9VQ57|DERL1_DROME Derlin-1 OS=Drosophila melanogaster OX=7227 GN=Der-1 PE=2 SV=1	2	2	2	28.256	245	11	11	1525900	2823700
Q9VXP3		mRpS30	tr|Q9VXP3|Q9VXP3_DROME GH05406p OS=Drosophila melanogaster OX=7227 GN=mRpS30 PE=1 SV=1	1	5	5	65.106	557	9	7.4	1512300	2783900
A0A1B2AJY7;Q9VLV5	Probable small nuclear ribonucleoprotein E	SmE	tr|A0A1B2AJY7|A0A1B2AJY7_DROME Small nuclear ribonucleoprotein E (Fragment) OS=Drosophila melanogaster OX=7227 PE=2 SV=1;sp|Q9VLV5|RUXE_DROME Probable small nuclear ribonucleoprotein E OS=Drosophila melanogaster OX=7227 GN=SmE PE=1 SV=1	2	2	2	11.096	94	27.7	27.7	2792800	5134500
Q9VJZ5		Tap42	tr|Q9VJZ5|Q9VJZ5_DROME LD07294p OS=Drosophila melanogaster OX=7227 GN=Tap42 PE=1 SV=2	1	2	2	43.319	380	7.4	5	934100	1715500
Q9VP47	Pre-rRNA-processing protein TSR1 homolog	CG7338	sp|Q9VP47|TSR1_DROME Pre-rRNA-processing protein TSR1 homolog OS=Drosophila melanogaster OX=7227 GN=CG7338 PE=1 SV=1	1	5	5	93.716	814	5.3	7.7	1588500	2908100
M9NDX0;M9PDS8;M9PEA9;M9PGZ0;M9PBI9;M9PEA5;M9PDZ9;M9PDS3;M9PBJ0;M9PGY4;M9PDZ6;M9PEA0;Q9I7U4;I1WYI2	Titin	sls	tr|M9NDX0|M9NDX0_DROME Sallimus, isoform D OS=Drosophila melanogaster OX=7227 GN=sls PE=4 SV=1;tr|M9PDS8|M9PDS8_DROME Sallimus, isoform Y OS=Drosophila melanogaster OX=7227 GN=sls PE=4 SV=1;tr|M9PEA9|M9PEA9_DROME Sallimus, isoform Z OS=Drosophila melanogas	14	4	4	542.45	4811	1.1	1	642040	1175200
Q9VXN4	Probable arginine--tRNA ligase, cytoplasmic	Aats-arg	sp|Q9VXN4|SYRC_DROME Probable arginine--tRNA ligase, cytoplasmic OS=Drosophila melanogaster OX=7227 GN=ArgRS PE=2 SV=1	1	13	13	75.576	665	17.9	18.9	8398300	15340000
L0MNA8;P40945	ADP-ribosylation factor 2	Arf102F	tr|L0MNA8|L0MNA8_DROME ADP ribosylation factor at 102F, isoform B OS=Drosophila melanogaster OX=7227 GN=Arf102F PE=3 SV=1;sp|P40945|ARF2_DROME ADP-ribosylation factor 2 OS=Drosophila melanogaster OX=7227 GN=Arf102F PE=2 SV=2	2	9	6	20.617	180	50.6	60.6	6667800	12157000
Q9W335		l(1)G0320	tr|Q9W335|Q9W335_DROME LD26546p OS=Drosophila melanogaster OX=7227 GN=l(1)G0320 PE=1 SV=1	1	3	3	33.03	302	12.9	12.9	4738800	8602900
F3YDB2;P41375	Eukaryotic translation initiation factor 2 subunit 2	eIF-2beta-RA;eIF-2beta	tr|F3YDB2|F3YDB2_DROME LD35750p OS=Drosophila melanogaster OX=7227 GN=eIF-2beta-RA PE=2 SV=1;sp|P41375|IF2B_DROME Eukaryotic translation initiation factor 2 subunit 2 OS=Drosophila melanogaster OX=7227 GN=eIF2beta PE=1 SV=1	2	7	7	35.217	312	16.7	24.7	5105800	9259900
M9MSM4;Q7KTV5;Q9VNX6;Q7Z2C9;M9PFZ1		Nopp140	tr|M9MSM4|M9MSM4_DROME Nopp140, isoform F OS=Drosophila melanogaster OX=7227 GN=Nopp140 PE=1 SV=1;tr|Q7KTV5|Q7KTV5_DROME Nopp140, isoform B OS=Drosophila melanogaster OX=7227 GN=Nopp140 PE=1 SV=1;tr|Q9VNX6|Q9VNX6_DROME LD06749p OS=Drosophila melanogaster O	5	3	3	70.473	685	3.5	1.9	6409400	11615000
Q7JYX5		Vamp7	tr|Q7JYX5|Q7JYX5_DROME RH15778p OS=Drosophila melanogaster OX=7227 GN=Vamp7 PE=1 SV=1	1	3	3	24.942	218	11.5	13.8	979060	1768400
Q9W2M0		Rbpn-5	tr|Q9W2M0|Q9W2M0_DROME LD23155p OS=Drosophila melanogaster OX=7227 GN=Rbpn-5 PE=1 SV=2	1	2	2	74.971	647	5.9	5.9	455090	821770
A0A0B4KFT0;Q94514	Cytochrome c oxidase subunit 5A, mitochondrial	CoVa	tr|A0A0B4KFT0|A0A0B4KFT0_DROME Cytochrome c oxidase subunit 5A, isoform C OS=Drosophila melanogaster OX=7227 GN=COX5A PE=4 SV=1;sp|Q94514|COX5A_DROME Cytochrome c oxidase subunit 5A, mitochondrial OS=Drosophila melanogaster OX=7227 GN=COX5A PE=2 SV=2	2	9	9	16.622	149	52.3	52.3	15697000	28280000
M9PB96;Q9VKQ3	Ribosome biogenesis protein WDR12 homolog	CG6724	tr|M9PB96|M9PB96_DROME Ribosome biogenesis protein WDR12 homolog OS=Drosophila melanogaster OX=7227 GN=Dmel\CG6724 PE=3 SV=1;sp|Q9VKQ3|WDR12_DROME Ribosome biogenesis protein WDR12 homolog OS=Drosophila melanogaster OX=7227 GN=CG6724 PE=2 SV=1	2	6	6	46.966	418	21.5	13.9	2387600	4296600
Q9VZU8;Q95SA2		CG1291	tr|Q9VZU8|Q9VZU8_DROME RE67594p OS=Drosophila melanogaster OX=7227 GN=Alg2 PE=1 SV=1;tr|Q95SA2|Q95SA2_DROME GM04690p OS=Drosophila melanogaster OX=7227 GN=Alg2 PE=2 SV=1	2	7	7	48.598	424	20.5	24.8	5371900	9663600
X2JEM4;Q9W334	40S ribosomal protein S28	RpS28b	tr|X2JEM4|X2JEM4_DROME GEO07185p1 OS=Drosophila melanogaster OX=7227 GN=RpS28b PE=2 SV=1;sp|Q9W334|RS28_DROME 40S ribosomal protein S28 OS=Drosophila melanogaster OX=7227 GN=RpS28b PE=1 SV=2	2	5	5	7.4766	65	43.1	43.1	5962500	10716000
Q8IMR0;Q8IMR1;E8NH89;B7Z0Q8;A0A0B4KH68		Lerp;Lerp-RA	tr|Q8IMR0|Q8IMR0_DROME Lysosomal enzyme receptor protein OS=Drosophila melanogaster OX=7227 GN=Lerp PE=1 SV=2;tr|Q8IMR1|Q8IMR1_DROME LD05154p OS=Drosophila melanogaster OX=7227 GN=Lerp PE=1 SV=2;tr|E8NH89|E8NH89_DROME LD06659p (Fragment) OS=Drosophila mela	5	2	2	97.154	886	5.6	1.7	535540	960950
B6IDL7;Q9VS46	RINT1-like protein	CG8605-RA;CG8605	tr|B6IDL7|B6IDL7_DROME FI03678p OS=Drosophila melanogaster OX=7227 GN=CG8605-RA PE=2 SV=1;sp|Q9VS46|RINT1_DROME RINT1-like protein OS=Drosophila melanogaster OX=7227 GN=Rint1 PE=2 SV=2	2	1	1	83.534	724	1.5	1.5	147340	264070
Q9VWD0		parvin	tr|Q9VWD0|Q9VWD0_DROME GH23568p OS=Drosophila melanogaster OX=7227 GN=parvin PE=1 SV=2	1	2	2	41.863	367	7.9	7.9	1369700	2448600
Q8IMU2;A0A0B4KHU4;Q8SWX6			tr|Q8IMU2|Q8IMU2_DROME RE10237p OS=Drosophila melanogaster OX=7227 GN=Dmel\CG11790 PE=1 SV=1;tr|A0A0B4KHU4|A0A0B4KHU4_DROME Uncharacterized protein, isoform C OS=Drosophila melanogaster OX=7227 GN=Dmel\CG11790 PE=1 SV=1;tr|Q8SWX6|Q8SWX6_DROME GH08893p OS=D	3	5	5	27.135	245	20	26.5	2358300	4212000
Q7KUT2;Q960X9	Lon protease homolog, mitochondrial	Lon	sp|Q7KUT2|LONM_DROME Lon protease homolog, mitochondrial OS=Drosophila melanogaster OX=7227 GN=Lon PE=1 SV=1;tr|Q960X9|Q960X9_DROME Lon protease homolog, mitochondrial OS=Drosophila melanogaster OX=7227 GN=Lon PE=2 SV=1	2	13	13	115.03	1024	14.2	19.6	4928900	8772100
M9PB89;Q8MYY7			tr|M9PB89|M9PB89_DROME Uncharacterized protein, isoform B OS=Drosophila melanogaster OX=7227 GN=Dmel\CG31715 PE=1 SV=1;tr|Q8MYY7|Q8MYY7_DROME RE44624p OS=Drosophila melanogaster OX=7227 GN=Dmel\CG31715 PE=1 SV=1	2	1	1	13.062	119	10.9	10.9	487460	867120
X2J9A5;Q9VII9			tr|X2J9A5|X2J9A5_DROME Uncharacterized protein, isoform B OS=Drosophila melanogaster OX=7227 GN=CG9332 PE=1 SV=1;tr|Q9VII9|Q9VII9_DROME LD14730p OS=Drosophila melanogaster OX=7227 GN=Dmel\CG31673 PE=1 SV=2	2	5	5	35.603	325	25.8	25.8	2188300	3887800
Q9VCY3	COP9 signalosome complex subunit 6	CSN6	sp|Q9VCY3|CSN6_DROME COP9 signalosome complex subunit 6 OS=Drosophila melanogaster OX=7227 GN=CSN6 PE=1 SV=1	1	1	1	38.305	341	5.6	5.6	227510	402830
Q9V9Z9	Probable rRNA-processing protein EBP2 homolog	CG1542	sp|Q9V9Z9|EBP2_DROME Probable rRNA-processing protein EBP2 homolog OS=Drosophila melanogaster OX=7227 GN=CG1542 PE=2 SV=1	1	4	4	35.077	307	13	18.6	1405100	2480900
Q9VRD6;D0Z726;Q6WAR9;A8JUT4;Q6WAR0;Q9VJ85;Q8I8H2;Q8I0N0;Q8I078		Ntf-2	tr|Q9VRD6|Q9VRD6_DROME GEO05124p1 OS=Drosophila melanogaster OX=7227 GN=Ntf-2 PE=1 SV=1;tr|D0Z726|D0Z726_DROME MIP14975p OS=Drosophila melanogaster OX=7227 GN=Ntf-2 PE=1 SV=1;tr|Q6WAR9|Q6WAR9_DROME CG1740 protein (Fragment) OS=Drosophila melanogaster OX=72	9	6	6	14.565	130	68.5	68.5	11231000	19764000
Q0E8V7		Tim13	tr|Q0E8V7|Q0E8V7_DROME GEO11073p1 OS=Drosophila melanogaster OX=7227 GN=Dmel\CG34132 PE=1 SV=1	1	1	1	9.6712	84	21.4	21.4	621260	1093200
P21914	Succinate dehydrogenase [ubiquinone] iron-sulfur subunit, mitochondrial	SdhB	sp|P21914|SDHB_DROME Succinate dehydrogenase [ubiquinone] iron-sulfur subunit, mitochondrial OS=Drosophila melanogaster OX=7227 GN=SdhB PE=2 SV=2	1	9	9	33.741	297	23.9	28.6	4918700	8650100
H5V888;C8VV04;C7LA80;A0A0B4KFI7;A0A0B4K7L1;P52034	ATP-dependent 6-phosphofructokinase	Pfk-RB;Pfk-RC;Pfk	tr|H5V888|H5V888_DROME ATP-dependent 6-phosphofructokinase OS=Drosophila melanogaster OX=7227 GN=Pfk-RB PE=2 SV=1;tr|C8VV04|C8VV04_DROME ATP-dependent 6-phosphofructokinase OS=Drosophila melanogaster OX=7227 GN=Pfk-RB PE=2 SV=1;tr|C7LA80|C7LA80_DROME ATP-d	6	5	5	86.647	788	7.7	7.4	1110400	1952000
Q9VZD8	THUMP domain-containing protein 1 homolog	CG15014	sp|Q9VZD8|THUM1_DROME THUMP domain-containing protein 1 homolog OS=Drosophila melanogaster OX=7227 GN=CG15014 PE=1 SV=2	1	3	3	36.206	324	9	12.3	1131000	1987100
Q9VEM0			tr|Q9VEM0|Q9VEM0_DROME RE41712p OS=Drosophila melanogaster OX=7227 GN=BcDNA:RE41712 PE=2 SV=1	1	1	1	17.329	160	7.5	7.5	54531	95200
Q09332	UDP-glucose:glycoprotein glucosyltransferase	Ugt	sp|Q09332|UGGG_DROME UDP-glucose:glycoprotein glucosyltransferase OS=Drosophila melanogaster OX=7227 GN=Ugt PE=1 SV=2	1	29	29	174.35	1548	27.4	23.4	15954000	27818000
Q9VF20		Hmt-1	tr|Q9VF20|Q9VF20_DROME Heavy metal tolerance factor 1 OS=Drosophila melanogaster OX=7227 GN=Hmt-1 PE=1 SV=1	1	1	1	97.885	866	2.3	2.3	174710	304590
Q9VRJ1	Alanine--tRNA ligase, mitochondrial	Aats-ala-m	sp|Q9VRJ1|SYAM_DROME Alanine--tRNA ligase, mitochondrial OS=Drosophila melanogaster OX=7227 GN=AlaRS-m PE=2 SV=1	1	1	1	113.1	1012	1.2	1.2	142660	248700
Q9V3N6		TM9SF4	tr|Q9V3N6|Q9V3N6_DROME Transmembrane 9 superfamily member OS=Drosophila melanogaster OX=7227 GN=TM9SF4 PE=1 SV=1	1	4	4	72.536	630	8.3	8.3	4015600	6982900
Q9W388;Q86B59;Q7KVR7;Q494L9;Q7KVR8		AP-1gamma	tr|Q9W388|Q9W388_DROME AP-1 complex subunit gamma OS=Drosophila melanogaster OX=7227 GN=AP-1gamma PE=1 SV=2;tr|Q86B59|Q86B59_DROME AP-1 complex subunit gamma OS=Drosophila melanogaster OX=7227 GN=AP-1gamma PE=1 SV=2;tr|Q7KVR7|Q7KVR7_DROME AP-1 complex subu	5	3	3	104.48	963	3.3	4.3	785130	1361600
Q7JV23;A8DY67;A1Z784;D0IQ86		ACC	tr|Q7JV23|Q7JV23_DROME Acetyl-CoA carboxylase, isoform B OS=Drosophila melanogaster OX=7227 GN=ACC PE=1 SV=1;tr|A8DY67|A8DY67_DROME Acetyl-CoA carboxylase, isoform E OS=Drosophila melanogaster OX=7227 GN=ACC PE=1 SV=2;tr|A1Z784|A1Z784_DROME Acetyl-CoA carb	4	21	21	261.92	2323	12.6	13.3	8324100	14415000
Q960D3;Q9VBX3;B5RIY3;A0A0S0X2W5;D2A6L8;A0A0H4CMP0;Q6NLK4		vig2;CG11844-RB;FDY	tr|Q960D3|Q960D3_DROME SD06613p OS=Drosophila melanogaster OX=7227 GN=vig2 PE=1 SV=1;tr|Q9VBX3|Q9VBX3_DROME Vig2, isoform B OS=Drosophila melanogaster OX=7227 GN=vig2 PE=1 SV=2;tr|B5RIY3|B5RIY3_DROME FI06040p (Fragment) OS=Drosophila melanogaster OX=7227 G	7	10	10	45.219	412	19.4	25.2	11205000	19401000
Q9W5W6			tr|Q9W5W6|Q9W5W6_DROME HL08141p OS=Drosophila melanogaster OX=7227 GN=Dmel\CG9578 PE=1 SV=2	1	1	1	32.337	272	5.9	5.9	394460	681890
Q9VJZ6			tr|Q9VJZ6|Q9VJZ6_DROME LD40224p OS=Drosophila melanogaster OX=7227 GN=Grx4 PE=1 SV=1	1	9	9	23.631	216	60.6	60.6	10276000	17714000
Q9VBQ5			tr|Q9VBQ5|Q9VBQ5_DROME LD38433p OS=Drosophila melanogaster OX=7227 GN=Dmel\CG5112 PE=1 SV=1	1	3	3	58.485	523	6.5	9.6	1698000	2917000
Q9VTF9	Ubiquitin fusion degradation protein 1 homolog	Ufd1-like	sp|Q9VTF9|UFD1_DROME Ubiquitin fusion degradation protein 1 homolog OS=Drosophila melanogaster OX=7227 GN=Ufd1-like PE=2 SV=1	1	1	1	34.791	316	4.1	4.1	356720	612040
Q9VFN9			tr|Q9VFN9|Q9VFN9_DROME GEO07882p1 OS=Drosophila melanogaster OX=7227 GN=BcDNA:RE55111 PE=1 SV=1	1	2	2	14.021	124	33.1	33.1	1618700	2775300
Q9W0K9;Q8IGC7		CG9205	tr|Q9W0K9|Q9W0K9_DROME LD10220p OS=Drosophila melanogaster OX=7227 GN=Dmel\CG9205 PE=1 SV=1;tr|Q8IGC7|Q8IGC7_DROME RH55218p (Fragment) OS=Drosophila melanogaster OX=7227 GN=CG9205 PE=2 SV=1	2	2	2	24.322	224	16.5	16.5	582680	995440
Q9VXG4	Annexin B11	AnxB11	sp|Q9VXG4|ANX11_DROME Annexin B11 OS=Drosophila melanogaster OX=7227 GN=AnxB11 PE=2 SV=2	1	1	1	56.214	511	2.9	2.9	766230	1307400
Q9VXH4			tr|Q9VXH4|Q9VXH4_DROME RE16337p OS=Drosophila melanogaster OX=7227 GN=Dmel\CG9921 PE=1 SV=1	1	3	3	11.413	102	28.4	18.6	540090	920040
Q9VN88		Vps37B	tr|Q9VN88|Q9VN88_DROME LD45836p OS=Drosophila melanogaster OX=7227 GN=Vps37B PE=1 SV=1	1	3	3	24.262	214	19.6	29	1685700	2852200
P20432	Glutathione S-transferase 1-1	GstD1	sp|P20432|GSTD1_DROME Glutathione S-transferase D1 OS=Drosophila melanogaster OX=7227 GN=GstD1 PE=1 SV=1	1	7	7	23.866	209	34.9	34.9	13259000	22413000
Q9VYW6		rho-4	tr|Q9VYW6|Q9VYW6_DROME Rhomboid-like protein OS=Drosophila melanogaster OX=7227 GN=rho-4 PE=1 SV=2	1	2	2	48.03	417	6.7	6.7	917660	1550000
Q9VJL6;Q8MSR7		GMF	tr|Q9VJL6|Q9VJL6_DROME GEO09696p1 OS=Drosophila melanogaster OX=7227 GN=GMF PE=1 SV=2	2	3	3	16.451	138	40.6	40.6	1544800	2605400
Q9VDP9;Q7KSB5;C6SUZ3		CG4390-RB	tr|Q9VDP9|Q9VDP9_DROME S-formylglutathione hydrolase OS=Drosophila melanogaster OX=7227 GN=Dmel\CG4390 PE=1 SV=1;tr|Q7KSB5|Q7KSB5_DROME S-formylglutathione hydrolase OS=Drosophila melanogaster OX=7227 GN=Dmel\CG4390 PE=1 SV=1;tr|C6SUZ3|C6SUZ3_DROME S-formy	3	3	3	31.441	286	15.4	12.2	8708600	14677000
A0A0B4KHR8;A0A0H4XWY3;A0A0B4K725;Q9VCA8;A0A0B4LHK4;A0A0B4KHZ8	Ankyrin repeat and KH domain-containing protein mask	mask	tr|A0A0B4KHR8|A0A0B4KHR8_DROME Multiple ankyrin repeats single KH domain, isoform E OS=Drosophila melanogaster OX=7227 GN=mask PE=4 SV=1;tr|A0A0H4XWY3|A0A0H4XWY3_DROME FI24704p1 (Fragment) OS=Drosophila melanogaster OX=7227 GN=mask-RA PE=2 SV=1;tr|A0A0B4K7	6	3	3	423.07	4000	1	0.8	402850	678000
E1JIJ5;P31409	V-type proton ATPase subunit B	Vha55	tr|E1JIJ5|E1JIJ5_DROME Vacuolar H[+]-ATPase 55kD subunit, isoform C OS=Drosophila melanogaster OX=7227 GN=Vha55 PE=1 SV=1;sp|P31409|VATB_DROME V-type proton ATPase subunit B OS=Drosophila melanogaster OX=7227 GN=Vha55 PE=2 SV=1	2	24	24	54.549	490	62.4	53.3	41541000	69471000
Q9W125;Q8SY88;B3DML8		ND-19;CG3683-RA	tr|Q9W125|Q9W125_DROME NADH dehydrogenase [ubiquinone] 1 alpha subcomplex subunit 8 OS=Drosophila melanogaster OX=7227 GN=ND-19 PE=1 SV=1;tr|Q8SY88|Q8SY88_DROME NADH dehydrogenase [ubiquinone] 1 alpha subcomplex subunit 8 OS=Drosophila melanogaster OX=7227	3	2	2	19.845	175	17.7	17.7	1701000	2843600
Q9VD29;Q95SY7;Q9NFN8		Sar1	tr|Q9VD29|Q9VD29_DROME RE74312p OS=Drosophila melanogaster OX=7227 GN=Sar1 PE=1 SV=1;tr|Q95SY7|Q95SY7_DROME LD39266p OS=Drosophila melanogaster OX=7227 GN=Sar1 PE=2 SV=1;tr|Q9NFN8|Q9NFN8_DROME Putative Sar1 protein OS=Drosophila melanogaster OX=7227 GN=Sar	3	10	10	21.811	193	56.5	56.5	17067000	28408000
A0A1B2AKZ2;Q9VFB2	28S ribosomal protein S10, mitochondrial	mRpS10	tr|A0A1B2AKZ2|A0A1B2AKZ2_DROME GEO08163p1 (Fragment) OS=Drosophila melanogaster OX=7227 PE=2 SV=1;sp|Q9VFB2|RT10_DROME 28S ribosomal protein S10, mitochondrial OS=Drosophila melanogaster OX=7227 GN=mRpS10 PE=2 SV=2	2	2	2	18.759	163	16	16	499670	831690
Q8MLQ5;Q9W1G6;A0A0B4LHE0;Q9W1G5;Q8MKK5;A0A0B4LGD3		kcc	tr|Q8MLQ5|Q8MLQ5_DROME Kazachoc, isoform D OS=Drosophila melanogaster OX=7227 GN=kcc PE=1 SV=1;tr|Q9W1G6|Q9W1G6_DROME Kazachoc, isoform A OS=Drosophila melanogaster OX=7227 GN=kcc PE=1 SV=2;tr|A0A0B4LHE0|A0A0B4LHE0_DROME Kazachoc, isoform F OS=Drosophila m	6	4	4	119.27	1074	6.4	2.4	2918600	4856300
A0A1B2AJH4;O44437	Small nuclear ribonucleoprotein Sm D3	SmD3	tr|A0A1B2AJH4|A0A1B2AJH4_DROME Small nuclear ribonucleoprotein Sm D3 (Fragment) OS=Drosophila melanogaster OX=7227 PE=2 SV=1;sp|O44437|SMD3_DROME Small nuclear ribonucleoprotein Sm D3 OS=Drosophila melanogaster OX=7227 GN=SmD3 PE=1 SV=1	2	4	4	15.582	151	31.1	17.2	8348900	13869000
P08841	Tubulin beta-3 chain	betaTub60D	sp|P08841|TBB3_DROME Tubulin beta-3 chain OS=Drosophila melanogaster OX=7227 GN=betaTub60D PE=2 SV=2	1	18	1	50.849	454	45.4	49.3	48138000	79738000
P25160	ADP-ribosylation factor-like protein 1	Arl1	sp|P25160|ARL1_DROME ADP-ribosylation factor-like protein 1 OS=Drosophila melanogaster OX=7227 GN=Arl1 PE=2 SV=5	1	3	3	20.247	180	27.2	27.2	4743100	7851800
B5RJN7;Q9VEB3	Ribosome production factor 2 homolog	CG7993-RA;CG7993	tr|B5RJN7|B5RJN7_DROME FI07636p (Fragment) OS=Drosophila melanogaster OX=7227 GN=CG7993-RA PE=2 SV=1;sp|Q9VEB3|RPF2_DROME Ribosome production factor 2 homolog OS=Drosophila melanogaster OX=7227 GN=Non3 PE=2 SV=3	2	5	5	38.289	335	17.6	11.6	882200	1459500
Q7JR49		VhaAC45	tr|Q7JR49|Q7JR49_DROME LD09158p OS=Drosophila melanogaster OX=7227 GN=VhaAC45 PE=1 SV=1	1	1	1	41.123	379	4.7	4.7	155370	257000
B5RIS4;Q9U5L1	Signal recognition particle receptor subunit alpha homolog	Gtp-bp-RA;Gtp-bp	tr|B5RIS4|B5RIS4_DROME FI05231p OS=Drosophila melanogaster OX=7227 GN=Gtp-bp-RA PE=2 SV=1;sp|Q9U5L1|SRPRA_DROME Signal recognition particle receptor subunit alpha homolog OS=Drosophila melanogaster OX=7227 GN=Gtp-bp PE=1 SV=2	2	5	5	67.794	614	9.8	13.8	2988700	4940400
Q9VK46	Protein YIPF		tr|Q9VK46|Q9VK46_DROME Protein YIPF OS=Drosophila melanogaster OX=7227 GN=Yip1d1 PE=1 SV=1	1	2	2	28.199	264	15.2	15.2	821850	1351800
Q9VY78		Clic	tr|Q9VY78|Q9VY78_DROME Chloride intracellular channel, isoform A OS=Drosophila melanogaster OX=7227 GN=Clic PE=1 SV=1	1	11	11	30.17	260	41.5	45	34721000	56930000
M9PG22;P61209	ADP-ribosylation factor 1	Arf79F	tr|M9PG22|M9PG22_DROME ADP ribosylation factor at 79F, isoform J OS=Drosophila melanogaster OX=7227 GN=Arf79F PE=3 SV=1;sp|P61209|ARF1_DROME ADP-ribosylation factor 1 OS=Drosophila melanogaster OX=7227 GN=Arf79F PE=1 SV=2	2	11	8	20.688	182	47.3	57.1	21210000	34693000
Q8MRH0;Q9N9Z9;A1Z9I5		tum	tr|Q8MRH0|Q8MRH0_DROME RE37229p OS=Drosophila melanogaster OX=7227 GN=tum PE=2 SV=1;tr|Q9N9Z9|Q9N9Z9_DROME AcGAP protein OS=Drosophila melanogaster OX=7227 GN=tum PE=2 SV=1;tr|A1Z9I5|A1Z9I5_DROME FI24033p1 OS=Drosophila melanogaster OX=7227 GN=tum PE=1 SV=	3	3	3	50.594	456	4.8	4.8	1060200	1730700
Q9W1F5			tr|Q9W1F5|Q9W1F5_DROME RE54691p OS=Drosophila melanogaster OX=7227 GN=Dmel\CG3803 PE=2 SV=1	1	1	1	44.377	393	3.1	3.1	805550	1312600
B6UXE6;B6UXE1;A0A0B4LI25;P20480;B6UXF5;B6UXE7;B6UXE2;B6UXE0;Q5UHE2;B6UXD9;B6UXF9;B6UXG0;B6UXF4;B6UXF1;B6UXE5;B6UXE4;B6UXE3;B6UXF8;B6UXF7;B6UXD8;B6UXD4;B6UXF6	Kinesin-like protein;Protein claret segregational	ncd	tr|B6UXE6|B6UXE6_DROME Kinesin-like protein (Fragment) OS=Drosophila melanogaster OX=7227 GN=ncd PE=3 SV=1;tr|B6UXE1|B6UXE1_DROME Kinesin-like protein (Fragment) OS=Drosophila melanogaster OX=7227 GN=ncd PE=3 SV=1;tr|A0A0B4LI25|A0A0B4LI25_DROME Kinesin-lik	22	18	18	70.892	641	27.9	26.8	16395000	26703000
M9PBS9;M9PEJ2;M9PHL4;M9PES8;M9PEC1;Q9VRY6			tr|M9PBS9|M9PBS9_DROME Uncharacterized protein, isoform F OS=Drosophila melanogaster OX=7227 GN=Dmel\CG10103 PE=1 SV=1;tr|M9PEJ2|M9PEJ2_DROME Uncharacterized protein, isoform D OS=Drosophila melanogaster OX=7227 GN=Dmel\CG10103 PE=1 SV=1;tr|M9PHL4|M9PHL4_D	6	2	2	35.623	327	8.6	8.6	715630	1156200
Q7JXU4		Ns2	tr|Q7JXU4|Q7JXU4_DROME Nucleolar GTP-binding protein 2 OS=Drosophila melanogaster OX=7227 GN=Ns2 PE=1 SV=1	1	2	2	76.607	674	4.6	2.4	143250	230950
Q7K2L7			tr|Q7K2L7|Q7K2L7_DROME GH27120p OS=Drosophila melanogaster OX=7227 GN=Dmel\CG17765 PE=1 SV=1	1	4	4	22.491	199	30.2	18.1	1809800	2912600
P17704	40S ribosomal protein S17	RpS17	sp|P17704|RS17_DROME 40S ribosomal protein S17 OS=Drosophila melanogaster OX=7227 GN=RpS17 PE=1 SV=2	1	10	10	15.285	131	69.5	63.4	50871000	81836000
Q9VFE7		Nup93-2	tr|Q9VFE7|Q9VFE7_DROME Nuclear pore protein OS=Drosophila melanogaster OX=7227 GN=Nup93-2 PE=1 SV=1	1	1	1	90.598	796	2.5	2.5	327850	526700
O77477			tr|O77477|O77477_DROME LD24471p OS=Drosophila melanogaster OX=7227 GN=GM14313 PE=1 SV=1	1	4	4	45.707	406	8.9	12.3	2077400	3324900
M9PG40;Q8SYG3;M9PDD4;D3DME9			tr|M9PG40|M9PG40_DROME Uncharacterized protein, isoform D OS=Drosophila melanogaster OX=7227 GN=Dmel\CG40045 PE=1 SV=1;tr|Q8SYG3|Q8SYG3_DROME RE63412p OS=Drosophila melanogaster OX=7227 GN=Dmel\CG40045 PE=1 SV=1;tr|M9PDD4|M9PDD4_DROME Uncharacterized prote	4	6	6	19.203	167	45.5	45.5	11309000	18091000
Q9VB05		ALiX	tr|Q9VB05|Q9VB05_DROME ALG-2 interacting protein X OS=Drosophila melanogaster OX=7227 GN=ALiX PE=1 SV=1	1	6	6	92.538	836	9.6	12.8	1416900	2266300
Q9XZ29	Kinesin-like protein	Klp3A	tr|Q9XZ29|Q9XZ29_DROME EG:BACR25B3.9 protein OS=Drosophila melanogaster OX=7227 GN=Klp3A PE=1 SV=1	1	1	1	135.81	1212	0.9	0.9	159340	254120
A0A0B4KFY5;Q8T4D1;Q0KI96;A0A023UKB8;Q9GQN3;Q9GQN4;Q8INP0;A0A0B4LGY5;Q8IGS7;A0A0B4LI06;A0A0B4JCX5;A0A0B4KGY6;C9QP09		ps;ps-RK	tr|A0A0B4KFY5|A0A0B4KFY5_DROME Pasilla, isoform Q OS=Drosophila melanogaster OX=7227 GN=ps PE=1 SV=1;tr|Q8T4D1|Q8T4D1_DROME AT03366p OS=Drosophila melanogaster OX=7227 GN=ps PE=1 SV=1;tr|Q0KI96|Q0KI96_DROME Pasilla, isoform K OS=Drosophila melanogaster OX=	13	6	1	53.653	517	16.8	17.6	3098200	4936900
Q94523	Succinate dehydrogenase [ubiquinone] flavoprotein subunit, mitochondrial	SdhA	sp|Q94523|SDHA_DROME Succinate dehydrogenase [ubiquinone] flavoprotein subunit, mitochondrial OS=Drosophila melanogaster OX=7227 GN=SdhA PE=2 SV=3	1	16	16	72.342	661	28.4	35.1	21071000	33440000
E4NKM4;A0A0B4JCU8;Q9V8M5	3-hydroxyisobutyrate dehydrogenase;Probable 3-hydroxyisobutyrate dehydrogenase, mitochondrial	CG15093-RB;CG15093	tr|E4NKM4|E4NKM4_DROME RH73972p OS=Drosophila melanogaster OX=7227 GN=CG15093-RB PE=2 SV=1;tr|A0A0B4JCU8|A0A0B4JCU8_DROME 3-hydroxyisobutyrate dehydrogenase OS=Drosophila melanogaster OX=7227 GN=Dmel\CG15093 PE=1 SV=1;sp|Q9V8M5|3HIDH_DROME Probable 3-hydro	3	2	2	26.149	249	16.9	16.9	570190	903970
M9NFP2;A8JNN3;A8JNN2;A8JNN1;M9PHR5;M9NE45;Q6IDD9	Sterile alpha and TIR motif-containing protein 1	Ect4	tr|M9NFP2|M9NFP2_DROME Ectoderm-expressed 4, isoform J OS=Drosophila melanogaster OX=7227 GN=Ect4 PE=1 SV=1;tr|A8JNN3|A8JNN3_DROME Ectoderm-expressed 4, isoform H OS=Drosophila melanogaster OX=7227 GN=Ect4 PE=1 SV=1;tr|A8JNN2|A8JNN2_DROME Ectoderm-expresse	7	4	4	115.81	1059	6.4	4.4	1049500	1662800
Q9VFM9	Twinfilin	twf	sp|Q9VFM9|TWF_DROME Twinfilin OS=Drosophila melanogaster OX=7227 GN=twf PE=1 SV=1	1	6	6	39.07	343	28.9	20.4	2763700	4369400
O97428;D5AEL7;Q8IRS7		cib	tr|O97428|O97428_DROME Ciboulot, isoform A OS=Drosophila melanogaster OX=7227 GN=cib PE=1 SV=1;tr|D5AEL7|D5AEL7_DROME MIP21378p OS=Drosophila melanogaster OX=7227 PE=2 SV=1;tr|Q8IRS7|Q8IRS7_DROME Ciboulot, isoform C OS=Drosophila melanogaster OX=7227 GN=ci	3	4	4	14.41	129	43.4	43.4	3619400	5713700
Q8IRQ5;Q9W3X6;Q8SXM1;B4YWB2;B4YWA6;B4YWC0;Q9W3X5		l(1)G0255	tr|Q8IRQ5|Q8IRQ5_DROME LP02262p OS=Drosophila melanogaster OX=7227 GN=Fum1 PE=1 SV=1;tr|Q9W3X6|Q9W3X6_DROME FI05334p OS=Drosophila melanogaster OX=7227 GN=Fum1 PE=1 SV=3;tr|Q8SXM1|Q8SXM1_DROME LD46083p OS=Drosophila melanogaster OX=7227 GN=Fum1 PE=2 SV=1	7	8	8	50.459	467	22.1	22.5	5389400	8501200
M9PBK5;P08570	60S acidic ribosomal protein P1	RpLP1	tr|M9PBK5|M9PBK5_DROME Ribosomal protein LP1, isoform B OS=Drosophila melanogaster OX=7227 GN=RpLP1 PE=3 SV=1;sp|P08570|RLA1_DROME 60S acidic ribosomal protein P1 OS=Drosophila melanogaster OX=7227 GN=RpLP1 PE=1 SV=2	2	8	8	11.513	112	70.5	79.5	70280000	110800000
Q9W2S1;C9QP43;Q7KVQ7		Tango5;Tango5-RC	tr|Q9W2S1|Q9W2S1_DROME FI17817p1 OS=Drosophila melanogaster OX=7227 GN=Tango5 PE=1 SV=1;tr|C9QP43|C9QP43_DROME IP15944p OS=Drosophila melanogaster OX=7227 GN=Tango5-RC PE=2 SV=1;tr|Q7KVQ7|Q7KVQ7_DROME Transport and golgi organization 5, isoform B OS=Drosop	3	5	5	58.183	530	10.9	11.9	3637600	5724600
A4V2K7;P22058	Chromosomal protein D1	D1	tr|A4V2K7|A4V2K7_DROME D1 chromosomal protein, isoform C OS=Drosophila melanogaster OX=7227 GN=D1 PE=1 SV=1;sp|P22058|CPD1_DROME Chromosomal protein D1 OS=Drosophila melanogaster OX=7227 GN=D1 PE=1 SV=3	2	7	7	37	355	9.9	13.2	7438000	11654000
Q9VR31		Fnta	tr|Q9VR31|Q9VR31_DROME Farnesyl transferase alpha, isoform A OS=Drosophila melanogaster OX=7227 GN=Fnta PE=1 SV=1	1	3	3	38.907	331	12.4	15.1	1834200	2866200
Q9VSN9;Q6IDG2		SrpRbeta	tr|Q9VSN9|Q9VSN9_DROME GM04779p OS=Drosophila melanogaster OX=7227 GN=SrpRbeta PE=1 SV=2;tr|Q6IDG2|Q6IDG2_DROME RE55992p (Fragment) OS=Drosophila melanogaster OX=7227 PE=2 SV=1	2	5	5	27.088	244	26.6	26.6	12934000	20208000
Q9VU87	Vacuolar protein-sorting-associated protein 36	Vps36	sp|Q9VU87|VPS36_DROME Vacuolar protein-sorting-associated protein 36 OS=Drosophila melanogaster OX=7227 GN=Vps36 PE=2 SV=2	1	1	1	44.213	399	5.5	5.5	208410	325380
Q9VN50	Eukaryotic translation initiation factor 3 subunit F-1	eIF3-S5-1	sp|Q9VN50|EI3F1_DROME Eukaryotic translation initiation factor 3 subunit F-1 OS=Drosophila melanogaster OX=7227 GN=eIF3f1 PE=2 SV=1	1	8	8	31.104	280	39.3	30.4	9131700	14234000
X2JEX7;Q9VYQ8	Ubiquitin carboxyl-terminal hydrolase;Ubiquitin carboxyl-terminal hydrolase 7	Usp7	tr|X2JEX7|X2JEX7_DROME Ubiquitin-specific protease 7, isoform C OS=Drosophila melanogaster OX=7227 GN=Usp7 PE=3 SV=1;sp|Q9VYQ8|UBP7_DROME Ubiquitin carboxyl-terminal hydrolase 7 OS=Drosophila melanogaster OX=7227 GN=Usp7 PE=1 SV=1	2	3	3	130.05	1125	4.8	2.6	391300	609930
Q9VPY2;Q9GUB1		Plap	tr|Q9VPY2|Q9VPY2_DROME Phospholipase A2 activator protein, isoform A OS=Drosophila melanogaster OX=7227 GN=Plap PE=1 SV=1;tr|Q9GUB1|Q9GUB1_DROME Phospholipase A2 activating protein homolog OS=Drosophila melanogaster OX=7227 GN=Plap PE=2 SV=1	2	11	11	85.75	787	16.9	16.6	10904000	16981000
Q9V431	Apoptosis inhibitor 5 homolog	Aac11	sp|Q9V431|API5_DROME Apoptosis inhibitor 5 homolog OS=Drosophila melanogaster OX=7227 GN=Aac11 PE=2 SV=1	1	10	10	59.929	536	22.2	28.4	5851100	9073100
Q9VGA0;E4NKK7		GstD9;GstD9-RA	tr|Q9VGA0|Q9VGA0_DROME Glutathione S transferase D9, isoform A OS=Drosophila melanogaster OX=7227 GN=GstD9 PE=1 SV=1;tr|E4NKK7|E4NKK7_DROME AT21115p (Fragment) OS=Drosophila melanogaster OX=7227 GN=GstD9-RA PE=2 SV=1	2	2	2	25.461	218	17	7.3	1095900	1697800
P52029	Glucose-6-phosphate isomerase	Pgi	sp|P52029|G6PI_DROME Glucose-6-phosphate isomerase OS=Drosophila melanogaster OX=7227 GN=Pgi PE=2 SV=2	1	11	11	62.338	558	25.4	26.2	7410000	11469000
O62530		AP-2mu	tr|O62530|O62530_DROME Adaptor protein complex 2, mu subunit, isoform A OS=Drosophila melanogaster OX=7227 GN=AP-2mu PE=1 SV=1	1	7	7	49.855	437	14.2	15.1	2392700	3679400
Q9VJJ0	Proteasome subunit beta type	Prosbeta4	tr|Q9VJJ0|Q9VJJ0_DROME Proteasome subunit beta OS=Drosophila melanogaster OX=7227 GN=Prosbeta4 PE=1 SV=1	1	9	9	22.481	201	43.8	33.8	15660000	24041000
Q9VHW4;Q960B1		unc-45	tr|Q9VHW4|Q9VHW4_DROME FI21225p1 OS=Drosophila melanogaster OX=7227 GN=unc-45 PE=1 SV=1;tr|Q960B1|Q960B1_DROME SD10334p OS=Drosophila melanogaster OX=7227 GN=unc-45 PE=1 SV=1	2	2	2	105.05	947	2.7	1.8	518050	793780
I6QP77;Q9NH51;Q9VD13;Q8IN05;I6R4B6		LqfR;lqfR	tr|I6QP77|I6QP77_DROME LqfR-L OS=Drosophila melanogaster OX=7227 GN=LqfR PE=2 SV=1;tr|Q9NH51|Q9NH51_DROME Epsin-like protein OS=Drosophila melanogaster OX=7227 GN=lqfR PE=2 SV=1;tr|Q9VD13|Q9VD13_DROME GH02671p OS=Drosophila melanogaster OX=7227 GN=lqfR PE=	5	4	4	67.524	633	7.7	8.1	2677000	4079400
M9PDV1;M9NCZ5;D2NUK4;P48608	Protein diaphanous	dia;dia-RA	tr|M9PDV1|M9PDV1_DROME Diaphanous, isoform E OS=Drosophila melanogaster OX=7227 GN=dia PE=1 SV=1;tr|M9NCZ5|M9NCZ5_DROME Diaphanous, isoform D OS=Drosophila melanogaster OX=7227 GN=dia PE=1 SV=1;tr|D2NUK4|D2NUK4_DROME MIP15714p OS=Drosophila melanogaster OX	4	11	11	123.17	1091	13.3	11	5903700	8989600
A0A0B4KHX3;O76324	Discs overgrown protein kinase	dco	tr|A0A0B4KHX3|A0A0B4KHX3_DROME Discs overgrown, isoform D OS=Drosophila melanogaster OX=7227 GN=dco PE=3 SV=1;sp|O76324|DCO_DROME Discs overgrown protein kinase OS=Drosophila melanogaster OX=7227 GN=dco PE=1 SV=2	2	2	2	47.957	440	5.7	3	607990	925700
A2VEU5;A2VES5;A2VEP3;Q0KI15;A2VES4			tr|A2VEU5|A2VEU5_DROME IP18385p (Fragment) OS=Drosophila melanogaster OX=7227 PE=2 SV=1;tr|A2VES5|A2VES5_DROME IP18285p (Fragment) OS=Drosophila melanogaster OX=7227 PE=2 SV=1;tr|A2VEP3|A2VEP3_DROME IP18085p (Fragment) OS=Drosophila melanogaster OX=7227 PE	5	1	1	14.36	127	12.6	12.6	717710	1092500
M9PJP0;Q9VXK0	Protein NipSnap	Nipsnap	tr|M9PJP0|M9PJP0_DROME Nipsnap, isoform F OS=Drosophila melanogaster OX=7227 GN=Nipsnap PE=4 SV=2;sp|Q9VXK0|NIPSN_DROME Protein NipSnap OS=Drosophila melanogaster OX=7227 GN=Nipsnap PE=2 SV=2	2	1	1	31.965	273	5.9	5.9	1024300	1558300
X2JIQ5;Q9W3W8	60S ribosomal protein L17	RpL17	tr|X2JIQ5|X2JIQ5_DROME Ribosomal protein L17, isoform E OS=Drosophila melanogaster OX=7227 GN=RpL17 PE=3 SV=1;sp|Q9W3W8|RL17_DROME 60S ribosomal protein L17 OS=Drosophila melanogaster OX=7227 GN=RpL17 PE=1 SV=1	2	8	8	21.593	186	38.2	28.5	37877000	57482000
C0PTW5;E1JH23;A0A0B4KEI3;D3DMG7;A1Z814	Oxysterol-binding protein	CG1513-RA	tr|C0PTW5|C0PTW5_DROME Oxysterol-binding protein OS=Drosophila melanogaster OX=7227 GN=CG1513-RA PE=2 SV=1;tr|E1JH23|E1JH23_DROME Oxysterol-binding protein OS=Drosophila melanogaster OX=7227 GN=Dmel\CG1513 PE=1 SV=1;tr|A0A0B4KEI3|A0A0B4KEI3_DROME Oxysterol	5	2	2	35.563	310	6.8	6.8	842510	1276400
Q9V5R2;A1Z8D1		Pex6	tr|Q9V5R2|Q9V5R2_DROME GH14288p1 OS=Drosophila melanogaster OX=7227 GN=Pex6 PE=2 SV=1;tr|A1Z8D1|A1Z8D1_DROME Peroxin 6, isoform D OS=Drosophila melanogaster OX=7227 GN=Pex6 PE=4 SV=1	2	1	1	101.12	897	2.1	2.1	38545	58360
Q9VKM7;Q9VKM8		CG6089	tr|Q9VKM7|Q9VKM7_DROME AT01533p OS=Drosophila melanogaster OX=7227 GN=CG6087 PE=1 SV=2	2	11	11	75.68	677	16.4	21.3	10008000	15151000
Q9VLB7;Q24349		Gdi	tr|Q9VLB7|Q9VLB7_DROME Rab GDP dissociation inhibitor OS=Drosophila melanogaster OX=7227 GN=Gdi PE=1 SV=1;tr|Q24349|Q24349_DROME Rab GDP dissociation inhibitor OS=Drosophila melanogaster OX=7227 GN=Gdi PE=2 SV=1	2	20	20	49.902	443	41.1	57.6	39141000	59244000
E1JHQ1;P20477	Glutamine synthetase;Glutamine synthetase 1, mitochondrial	Gs1	tr|E1JHQ1|E1JHQ1_DROME Glutamine synthetase OS=Drosophila melanogaster OX=7227 GN=Gs1 PE=1 SV=1;sp|P20477|GLNA1_DROME Glutamine synthetase 1, mitochondrial OS=Drosophila melanogaster OX=7227 GN=Gs1 PE=2 SV=3	2	4	4	44.395	399	19	17	4595600	6946300
Q9W3U9;X2JAQ5;B4F5E2		CG14434	tr|Q9W3U9|Q9W3U9_DROME CG14434-PA OS=Drosophila melanogaster OX=7227 GN=Dmel\CG14434 PE=1 SV=1;tr|X2JAQ5|X2JAQ5_DROME Uncharacterized protein, isoform C OS=Drosophila melanogaster OX=7227 GN=Dmel\CG14434 PE=1 SV=1;tr|B4F5E2|B4F5E2_DROME CG14434-PA OS=Droso	3	7	7	21.152	187	39	45.5	3293500	4974800
E1JIK0;P48810;C8VV67;A4V3J6;A4V3J5;E6PBW8;E8NH29;P07909	Heterogeneous nuclear ribonucleoprotein 87F	Hrb87F	tr|E1JIK0|E1JIK0_DROME Heterogeneous nuclear ribonucleoprotein at 87F, isoform C OS=Drosophila melanogaster OX=7227 GN=Hrb87F PE=1 SV=1;sp|P48810|RB87F_DROME Heterogeneous nuclear ribonucleoprotein 87F OS=Drosophila melanogaster OX=7227 GN=Hrb87F PE=2 SV=2	8	11	11	39.499	385	22.1	27.5	15899000	23899000
Q4V5X3;Q9VW73		CG14184;CG14184-RB	tr|Q4V5X3|Q4V5X3_DROME IP06477p (Fragment) OS=Drosophila melanogaster OX=7227 GN=CG14184 PE=2 SV=1;tr|Q9VW73|Q9VW73_DROME FI16105p1 OS=Drosophila melanogaster OX=7227 GN=dp18 PE=1 SV=1	2	1	1	19.984	176	15.9	15.9	630210	945690
