# Supplementary material for: Xkr regulates phosphatidylserine transport via enhanced ER-PM connectivity to promote apoptotic cell clearance
Source: Research Square preprint supplement (doi:10.21203/rs.3.rs-5680329/v1), 2025-01-31
Supplement: Supplementary file 4 [file bbf71978f93bba13055b0b46.xlsx]

## Sheet: Sheet2
Recombinant DNA
Plasmid names	Application	Source
pAC5.1-XKR-GFP	Express XKR-GFP in S2 cells	This paper
pAC5.1-GFP-XKR	Express GFP-XKR in S2 cells	This paper
pAC5.1-XKR-Flag	Express XKR-flag in S2 cells	This paper
pAC5.1-XKR-mCherry	Express XKR-mCherry in S2 cells	This paper
pAC5.1-XKR sgRNA-cas9	Express Cas9 protein targeted by XKR sgRNA to generate XKR mutated cells	This paper
pAC5.1-mCherry-CG1513	Express mCherry-tagged CG1513 in S2 cells	This paper
pAC5.1-mCherry-CG3860	Express mCherry-tagged CG3860 in S2 cells	This paper
pAC5.1-mCherry-TM9SF4	Express mCherry-tagged TM9SF4 in S2 cells	This paper
pAC5.1-GFP-Sac1	Express GFP-tagged Sac1 in S2 cells	This paper
pAC5.1-mCherry-Lact::C2	Express mCherry-tagged Lact::C2 in S2 cells	This paper
pAC5.1-BFP-Lact::C2	Express BFP-tagged Lact::C2 in S2 cells	This paper
pAC5.1-GFP-Rab5	Express GFP-tagged Rab5 in S2 cells	This paper
pAC5.1-GFP-Rab7	Express GFP-tagged Rab7 in S2 cells	This paper
pAC5.1-GFP-KDEL	Express GFP-tagged KDEL in S2 cells	This paper
pAC5.1-GFP-LAMP	Express GFP-tagged LAMP in S2 cells	This paper
pAC5.1-GFP-GM130	Express GFP-tagged GM130 in S2 cells	This paper
pMD18T	Used for generating sgRNA plasmid expressed in fly	[1]
PCR8	Used for generating sgRNA plasmid expressed in fly	[1]
attB	Used for generating sgRNA plasmid expressed in fly	[1]
pET28a-XKR	Express XKR-his in E. coli	This paper
pNubWT	Positive control for membrane yeast two-hybrid	This paper
pNubXgate32-Tm9sf4	Tm9sf4-Nub32, used for yeast two-hybrid	This paper
pBait-Cub-XKR	XKR-Cub, used for membrane yeast two-hybrid	This paper
pNubXgate32-Sac1	Sac1-Nub32, used for yeast two-hybrid	This paper
pBait-Cub-Tm9sf4	Tm9sf4-Cub, used for membrane yeast two-hybrid	This paper
pNubXgate32-CG1513 1-150	CG1513 1-150-Nub32, used for yeast two-hybrid	This paper
pNubXgate32-CG1513 151-420	CG1513 151-420-Nub32, used for yeast two-hybrid	This paper
pNubXgate32-CG1513 421-784	CG1513 421-784-Nub32, used for yeast two-hybrid	This paper
pNubXgate32-CG9205	CG9205-Nub32, used for yeast two-hybrid	This paper
pNubXgate32-CG1513	CG1513-Nub32, used for membrane yeast two-hybrid	This paper
pNubXgate32-CG3860	CG3860-Nub32, used for yeast two-hybrid	This paper
pNubXgate32-Vap33	Vap33-Nub32, used for membrane yeast two-hybrid	This paper
pAC5.1-mCherry-MAPPER	Express mCherry-MAPPER in S2 cells	This paper
pAC5.1-GFP-MAPPER	Express GFP-MAPPER in S2 cells	This paper
pAC5.1-HA-TM9SF4	Express HA-tagged TM9SF4 in S2 cells	This paper
pAC5.1-HA-CG3860	Express HA-tagged CG3860 in S2 cells	This paper
pAC5.1-HA-CG1513	Express HA-tagged CG1513 in S2 cells	This paper
pAC5.1-HA-CG1513 1-150	Express HA-tagged CG1513 1-150aa in S2 cells	This paper
pAC5.1-HA-CG1513 151-420	Express HA-tagged CG1513 151-420aa in S2 cells	This paper
pAC5.1-HA-CG1513 421-784	Express HA-tagged CG1513 421-784aa in S2 cells	This paper
pAC5.1-HA-Vap33	Express HA-tagged Vap33 in S2 cells	This paper
pAC5.1-HA-CG9205	Express HA-tagged CG9205 in S2 cells	This paper
pAC5.1-Sac1-Flag	Express Flag-tagged Sac1 in S2 cells	This paper
pAC5.1-V5-Sac1	Express V5-tagged Sac1 in S2 cells	This paper
pCDNA3.1-XKR-mVenusN	Express XKR tagged with mVenusN in HEK 293T cells, used for BiFC assay	This paper
pCDNA3.1 -CG3860-mVenusC	Express CG3860 tagged with mVenusC in HEK 293T cells, used for BiFC assay	This paper
pCDNA3.1 -CG3860-mVenusN	Express CG3860 tagged with mVenusN in HEK 293T cells, used for BiFC assay	This paper
pCDNA3.1-Vap33-mVenusN	Express Vap33 tagged with mVenusN in HEK 293T cells, used for BiFC assay	This paper
pCDNA3.1 -CG1513-mVenusC	Express CG1513 tagged with mVenusC in HEK 293T cells, used for BiFC assay	This paper
pCDNA3.1 -CG1513 1-150-mVenusC	Express CG1513 1-150aa tagged with mVenusC in HEK 293T cells, used for BiFC assay	This paper
pCDNA3.1 -CG1513 151-420-mVenusC	Express CG1513 151-420aa tagged with mVenusC in HEK 293T cells, used for BiFC assay	This paper
pCDNA3.1 -CG1513 421-784-mVenusC	Express CG1513 420-784aa tagged with mVenusC in HEK 293T cells, used for BiFC assay	This paper
pCDNA3.1 -TM9SF4-mVenusC	Express TM9SF4 tagged with mVenusC in HEK 293T cells, used for BiFC assay	This paper
pCDNA3.1 -Sac1-mVenusN	Express Sac1 tagged with mVenusN in HEK 293T cells, used for BiFC assay	This paper
pCDNA3.1-Xkr8-Flag	Express Xkr8 tagged with Flag in HEK 293T cells, used for Co-IP assay	This paper
pCDNA3.1 -HA-hTM9SF4	Express HA-tagged hTM9SF4 in HEK 293T cells, used for Co-IP assay	This paper
pCDNA3.1 -HA-OSBPL5	Express HA-tagged OSBPL5 in HEK 293T cells, used for Co-IP assay	This paper
pCDNA3.1 -HA-OSBPL8	Express HA-tagged OSBPL8 in HEK 293T cells, used for Co-IP assay	This paper
pCDNA3.1 -HA-OSBPL9	Express HA-tagged OSBPL9 in HEK 293T cells, used for Co-IP assay	This paper
pGreen xkr8	Express xkr8 shRNA in Hela or jurkat cells, used for RNAi	This paper
pGreen htm9sf4	Express htm9sf4 shRNA in Hela or jurkat cells, used for RNAi	This paper
pGreen sacml1	Express sacml1 shRNA in Hela or jurkat cells, used for RNAi	This paper
pGreen osbpl5	Express osbpl5 shRNA in Hela or jurkat cells, used for RNAi	This paper
pGreen osbpl8	Express osbpl8 shRNA in Hela or jurkat cells, used for RNAi	This paper
pGreen osbpl9	Express osbpl9 shRNA in Hela or jurkat cells, used for RNAi	This paper
