# Supplementary material for: Xkr regulates phosphatidylserine transport via enhanced ER-PM connectivity to promote apoptotic cell clearance
Source: Research Square preprint supplement (doi:10.21203/rs.3.rs-5680329/v1), 2025-01-31
Supplement: Supplementary file 5 [file d1f871d25e872da96a78ca29.xlsx]

## Sheet: proteinGroups
Protein IDs	Fasta headers	Number of proteins	Peptides	Unique peptides	Mol. weight [kDa]	Sequence length	Score	Sequence coverage R804-flag [%]	Sequence coverage R804-flagAC [%]	Sequence coverage R804-S2 [%]	Intensity R804-flag	Intensity R804-flagAC	Intensity R804-S2	ratio flag/S2	ratio flag AC/S2
M9PHV9;Q8IR18;Q5GH16;M9PHA4	tr|M9PHV9|M9PHV9_DROME XK-related protein OS=Drosophila melanogaster GN=Dmel\CG32579 PE=3 SV=1;tr|Q8IR18|Q8IR18_DROME XK-related protein OS=Drosophila melanogaster GN=Dmel\CG32579 PE=2 SV=1;tr|Q5GH16|Q5GH16_DROME XK-related protein OS=Drosophila melanogast	4	7	7	27.514	237	100.05	25.7	24.9	5.1	391900000	384590000	8350800	46.9296	46.0543
Q59E59;A0A0B4K7Q4;C9QPB4;D0IQ99;Q1WWE4	tr|Q59E59|Q59E59_DROME Zipper, isoform D OS=Drosophila melanogaster GN=zip PE=1 SV=1;tr|A0A0B4K7Q4|A0A0B4K7Q4_DROME Zipper, isoform I OS=Drosophila melanogaster GN=zip PE=1 SV=1	5	184	0	232.07	2016	323.31	70	66.3	66.9	60368000000	33271000000	63979000000
X2JCP8;P10987	tr|X2JCP8|X2JCP8_DROME Actin 5C, isoform E OS=Drosophila melanogaster GN=Act5C PE=3 SV=1;sp|P10987|ACT1_DROME Actin-5C OS=Drosophila melanogaster GN=Act5C PE=1 SV=4	2	23	1	41.821	376	323.31	66.8	58.8	58.8	42061000000	13673000000	23363000000
Q7PLL3;Q7PLL1;Q8SYL3;L7EEF1	tr|Q7PLL3|Q7PLL3_DROME Eukaryotic initiation factor 4B OS=Drosophila melanogaster GN=eIF4B PE=1 SV=1;tr|Q7PLL1|Q7PLL1_DROME Eukaryotic initiation factor 4B, isoform E OS=Drosophila melanogaster GN=eIF4B PE=1 SV=2;tr|Q8SYL3|Q8SYL3_DROME Eukaryotic initiatio	4	48	48	52.202	459	323.31	74.1	75.8	76.3	7249300000	6722900000	39591000000
P06605;P06603;K7X561;K7WQ63;K7WQ56;K7WKV5;K7XI11;K7WSB1;K7WKV0;K7WSB4;K7XI17;Q6NP92;P06606	sp|P06605|TBA3_DROME Tubulin alpha-3 chain OS=Drosophila melanogaster GN=alphaTub84D PE=2 SV=1;sp|P06603|TBA1_DROME Tubulin alpha-1 chain OS=Drosophila melanogaster GN=alphaTub84B PE=1 SV=1;tr|K7X561|K7X561_DROME Alpha tubulin 84B (Fragment) OS=Drosophila	13	26	11	49.89	450	323.31	57.3	61.6	61.6	5115800000	12379000000	23370000000
C6TP87;P08736;Q8T3U3;A4V3Q6;P05303	tr|C6TP87|C6TP87_DROME Elongation factor 1-alpha OS=Drosophila melanogaster GN=eEF1alpha1 PE=1 SV=1;sp|P08736|EF1A1_DROME Elongation factor 1-alpha 1 OS=Drosophila melanogaster GN=Ef1alpha48D PE=1 SV=2;tr|Q8T3U3|Q8T3U3_DROME GM14559p OS=Drosophila melanoga	5	27	27	50.306	463	269.92	54.6	65.9	56.4	3145600000	7420000000	20284000000
M9PBL3;P02828	tr|M9PBL3|M9PBL3_DROME Heat shock protein 83, isoform B OS=Drosophila melanogaster GN=Hsp83 PE=3 SV=1;sp|P02828|HSP83_DROME Heat shock protein 83 OS=Drosophila melanogaster GN=Hsp83 PE=1 SV=1	2	51	51	81.864	717	323.31	56.9	61.2	64.6	2807900000	10800000000	19942000000
Q24560;A1ZBL0;E0R982;P61857;Q7M3K1;Q7M3K0	sp|Q24560|TBB1_DROME Tubulin beta-1 chain OS=Drosophila melanogaster GN=betaTub56D PE=1 SV=2;tr|A1ZBL0|A1ZBL0_DROME Tubulin beta chain OS=Drosophila melanogaster GN=betaTub56D PE=1 SV=1;tr|E0R982|E0R982_DROME GH12877p OS=Drosophila melanogaster GN=betaTub5	6	26	16	50.147	447	323.31	76.3	75.4	66.7	2266300000	9130400000	11577000000
Q8IRG6	sp|Q8IRG6|SPT16_DROME FACT complex subunit spt16 OS=Drosophila melanogaster GN=dre4 PE=1 SV=2	1	60	57	123.58	1083	323.31	48.1	56	53.3	2080400000	15766000000	11585000000
C7LA75;P11147;Q8I0E9	tr|C7LA75|C7LA75_DROME Heat shock protein cognate 4, isoform G OS=Drosophila melanogaster GN=Hsc70-4 PE=1 SV=1;sp|P11147|HSP7D_DROME Heat shock 70 kDa protein cognate 4 OS=Drosophila melanogaster GN=Hsc70-4 PE=1 SV=3	3	38	28	71.131	651	323.31	58.8	64.5	64.7	1983500000	4266400000	11572000000
Q4V527;Q9VQS4	tr|Q4V527|Q4V527_DROME IP13307p (Fragment) OS=Drosophila melanogaster GN=CG15415 PE=2 SV=1;tr|Q9VQS4|Q9VQS4_DROME Spindly OS=Drosophila melanogaster GN=Spindly PE=4 SV=2	2	40	40	89.801	790	323.31	55.4	40.6	50.8	1839300000	1929600000	3797300000
Q59E58;A0A0B4JD57;A0A0B4JD95;J7JVR0;C9QPE3;REV__Q9VTC4;REV__A0A1B2AL76;REV__Q29QJ3	tr|Q59E58|Q59E58_DROME Zipper, isoform C OS=Drosophila melanogaster GN=zip PE=1 SV=1;tr|A0A0B4JD57|A0A0B4JD57_DROME Zipper, isoform F OS=Drosophila melanogaster GN=zip PE=1 SV=1;tr|A0A0B4JD95|A0A0B4JD95_DROME Zipper, isoform H OS=Drosophila melanogaster GN	8	183	1	226.91	1971	17.196	71.2	67.4	68.4	1676500000	366410000	1098700000
C1C3D3;A0A0B4K661;A0A0B4KG68;Q6NN28;P06754;A0A0B4KG06;Q058U3;H1UUP7;Q8IGY1;P49455;A0A0B4K6Y8;Q95TA3;Q8IG84;H1UUJ7;A0A0B4KHJ9;P09491	tr|C1C3D3|C1C3D3_DROME MIP08601p OS=Drosophila melanogaster GN=Tm1-RA PE=2 SV=1;tr|A0A0B4K661|A0A0B4K661_DROME Tropomyosin 1, isoform Q OS=Drosophila melanogaster GN=Tm1 PE=1 SV=1;tr|A0A0B4KG68|A0A0B4KG68_DROME Tropomyosin 1, isoform R OS=Drosophila melano	16	19	14	29.045	249	323.31	50.2	39.4	47	1391500000	627110000	3155200000
P54357;M9NEW1	sp|P54357|MLC2_DROME Myosin-2 essential light chain OS=Drosophila melanogaster GN=Mlc-c PE=1 SV=1;tr|M9NEW1|M9NEW1_DROME Myosin light chain cytoplasmic, isoform B OS=Drosophila melanogaster GN=Mlc-c PE=4 SV=1	2	12	12	16.613	147	295.52	94.6	94.6	85	1283100000	719640000	2321500000
F6J1D0;P40423	tr|F6J1D0|F6J1D0_DROME CG3595 OS=Drosophila melanogaster GN=sqh PE=1 SV=1;sp|P40423|SQH_DROME Myosin regulatory light chain sqh OS=Drosophila melanogaster GN=sqh PE=1 SV=1	2	9	9	19.954	174	66.668	63.8	63.8	63.8	1246200000	649280000	986410000
B5RJ65;Q05344;B1PFB4;B1PFA9;B1PFA0;B1PFC9;B1PFC6;B1PFB2;B1PFC1;B1PFA4;B1PFA2;B1PFA7;B1PFC8;B1PFB1;B1PFB9;B1PFA5;B1PFC0;B1PF99;B1PFC4;B1PFB8;B1PFA3;B1PFB6	tr|B5RJ65|B5RJ65_DROME FACT complex subunit SSRP1 OS=Drosophila melanogaster GN=Ssrp-RA PE=2 SV=1;sp|Q05344|SSRP1_DROME FACT complex subunit Ssrp1 OS=Drosophila melanogaster GN=Ssrp PE=1 SV=2;tr|B1PFB4|B1PFB4_DROME FACT complex subunit SSRP1 (Fragment) OS=	22	42	42	81.532	723	323.31	49.4	58	55.6	1216100000	9542800000	6126600000
X2JC31;P29742	tr|X2JC31|X2JC31_DROME Clathrin heavy chain OS=Drosophila melanogaster GN=Chc PE=3 SV=1;sp|P29742|CLH_DROME Clathrin heavy chain OS=Drosophila melanogaster GN=Chc PE=1 SV=1	2	74	74	191.18	1678	323.31	40.7	46.4	51.4	1098900000	2715500000	8288900000
P55830	sp|P55830|RS3A_DROME 40S ribosomal protein S3a OS=Drosophila melanogaster GN=RpS3A PE=1 SV=4	1	19	19	30.34	268	131.34	61.6	58.6	58.6	1038200000	7256200000	10059000000
Q8MYS0;Q9VRI0	tr|Q8MYS0|Q8MYS0_DROME RH74035p OS=Drosophila melanogaster GN=Hlc PE=2 SV=1;tr|Q9VRI0|Q9VRI0_DROME Helicase OS=Drosophila melanogaster GN=Hlc PE=1 SV=2	2	1	1	43.038	388	2.636	3.9	3.9	3.9	960040000	6588700	13415000
Q9VMC6	tr|Q9VMC6|Q9VMC6_DROME CG9547 OS=Drosophila melanogaster GN=152078_at PE=1 SV=1	1	13	13	45.756	419	138.44	48.7	37	20.3	909580000	247480000	82066000
Q9W111;Q8WQ61;Q8MMD2;Q8MMD3;E3CTP7	tr|Q9W111|Q9W111_DROME Epidermal growth factor receptor pathway substrate clone 15, isoform A OS=Drosophila melanogaster GN=Eps-15 PE=1 SV=2;tr|Q8WQ61|Q8WQ61_DROME Eps-15 protein OS=Drosophila melanogaster GN=Eps-15 PE=2 SV=1;tr|Q8MMD2|Q8MMD2_DROME Epiderm	5	35	35	134.36	1253	323.31	38.9	28	41.9	844970000	484480000	5760800000
M9PG76;P19889	tr|M9PG76|M9PG76_DROME 60S acidic ribosomal protein P0 OS=Drosophila melanogaster GN=RpLP0 PE=3 SV=1;sp|P19889|RLA0_DROME 60S acidic ribosomal protein P0 OS=Drosophila melanogaster GN=RpLP0 PE=1 SV=1	2	17	17	34.202	317	135.82	54.9	56.8	49.5	820590000	7986900000	3155600000
G3M3A2;Q29QY2;Q06559	tr|G3M3A2|G3M3A2_DROME Ribosomal protein S3, isoform B OS=Drosophila melanogaster GN=RpS3 PE=1 SV=1;tr|Q29QY2|Q29QY2_DROME IP15838p (Fragment) OS=Drosophila melanogaster PE=2 SV=1;sp|Q06559|RS3_DROME 40S ribosomal protein S3 OS=Drosophila melanogaster GN=R	3	23	23	27.471	246	73.162	77.6	74.8	74.4	801700000	3948000000	6583200000
Q8IMI7;Q9VA91;Q3KN36	tr|Q8IMI7|Q8IMI7_DROME 40S ribosomal protein S7 OS=Drosophila melanogaster GN=RpS7 PE=1 SV=2;sp|Q9VA91|RS7_DROME 40S ribosomal protein S7 OS=Drosophila melanogaster GN=RpS7 PE=1 SV=1;tr|Q3KN36|Q3KN36_DROME 40S ribosomal protein S7 OS=Drosophila melanogaste	3	21	21	22.17	194	219.03	75.8	75.8	76.8	785110000	5341900000	8692300000
X2JGM9;P41042	tr|X2JGM9|X2JGM9_DROME 40S ribosomal protein S4 OS=Drosophila melanogaster GN=RpS4 PE=3 SV=1;sp|P41042|RS4_DROME 40S ribosomal protein S4 OS=Drosophila melanogaster GN=RpS4 PE=1 SV=2	2	20	20	29.134	261	113.14	61.7	63.6	63.6	778810000	6212700000	7408400000
A0A0B4K6N1;Q8MLY8	tr|A0A0B4K6N1|A0A0B4K6N1_DROME 40S ribosomal protein S8 OS=Drosophila melanogaster GN=RpS8 PE=3 SV=1;sp|Q8MLY8|RS8_DROME 40S ribosomal protein S8 OS=Drosophila melanogaster GN=RpS8 PE=1 SV=1	2	16	16	23.759	208	323.31	61.1	61.1	61.5	615770000	5120300000	6373700000
Q99323	sp|Q99323|MYSN_DROME Myosin heavy chain, non-muscle OS=Drosophila melanogaster GN=zip PE=1 SV=2	1	178	2	236.64	2057	74.297	64.8	61.1	61.7	597720000	492320000	1011300000
E1JGP0;C8VV69;A0A0B4LH50;P53501;P10981;C6TP14;B6IDW7;P83967;M9PFZ6;P02574;Q3ZAJ5;F0JAT3;P45891	tr|E1JGP0|E1JGP0_DROME LD04994p1 OS=Drosophila melanogaster GN=Act57B-RC PE=2 SV=1;tr|C8VV69|C8VV69_DROME LD47405p OS=Drosophila melanogaster GN=Act57B-RA PE=2 SV=1;tr|A0A0B4LH50|A0A0B4LH50_DROME Actin 87E, isoform C OS=Drosophila melanogaster GN=Act87E PE	13	16	1	40.258	360	13.717	46.7	46.7	46.7	570780000	238130000	681650000
Q5U0W4;A0A1B2AIV7;Q5BIL1;P55841	tr|Q5U0W4|Q5U0W4_DROME GM06787p (Fragment) OS=Drosophila melanogaster PE=2 SV=1;tr|A0A1B2AIV7|A0A1B2AIV7_DROME GEO11454p1 (Fragment) OS=Drosophila melanogaster PE=2 SV=1;tr|Q5BIL1|Q5BIL1_DROME RH72463p (Fragment) OS=Drosophila melanogaster GN=RpL14 PE=2 SV	4	12	12	19.244	167	48.518	47.3	47.3	47.3	565190000	3795900000	4664100000
P09180;Q1EBX5	sp|P09180|RL4_DROME 60S ribosomal protein L4 OS=Drosophila melanogaster GN=RpL4 PE=1 SV=2;tr|Q1EBX5|Q1EBX5_DROME IP15855p OS=Drosophila melanogaster PE=2 SV=1	2	34	34	45.025	401	323.31	53.6	63.8	64.1	563020000	8178500000	9814200000
M9PCC1;O18640;M9PB67;B4YX01;B4YX00;B4YWZ6;F6J206;F6J1Z8;A9YGT1;A9YGT0;A9YGS8;A9YGS7;F6J9X0;F6J9W7;F6J9W5;REV__M9PBG8;REV__Q9W0S2	tr|M9PCC1|M9PCC1_DROME Receptor of activated protein kinase C 1, isoform C OS=Drosophila melanogaster GN=Rack1 PE=4 SV=1;sp|O18640|GBLP_DROME Guanine nucleotide-binding protein subunit beta-like protein OS=Drosophila melanogaster GN=Rack1 PE=1 SV=2	17	24	23	35.618	318	323.31	72	74.5	74.5	528580000	4917700000	6678500000
A0A0B4KH34;P22464	tr|A0A0B4KH34|A0A0B4KH34_DROME Annexin OS=Drosophila melanogaster GN=AnxB9 PE=1 SV=1;sp|P22464|ANXB9_DROME Annexin B9 OS=Drosophila melanogaster GN=AnxB9 PE=2 SV=2	2	15	15	35.944	324	204.59	50	31.5	36.7	528450000	228280000	459850000
Q7YU85;Q9VA36;A0A0B4KI32;A0A0B4KI34;Q86PF3;A0A0B4KHJ8;A0A0B4KHG1;Q9Y154;Q9VA35	tr|Q7YU85|Q7YU85_DROME SD08724p OS=Drosophila melanogaster GN=cindr PE=2 SV=1;tr|Q9VA36|Q9VA36_DROME CIN85 and CD2AP related, isoform C OS=Drosophila melanogaster GN=cindr PE=1 SV=2;tr|A0A0B4KI32|A0A0B4KI32_DROME CIN85 and CD2AP related, isoform E OS=Droso	9	45	45	92.284	880	323.31	44.4	43.8	62.8	511180000	1165500000	10681000000
Q960A7;Q9BI20;Q9VC93;I1WYH0;Q8MSY2	tr|Q960A7|Q960A7_DROME SD10981p OS=Drosophila melanogaster GN=Dis3 PE=2 SV=1;tr|Q9BI20|Q9BI20_DROME Putative exoribonuclease DIS3 OS=Drosophila melanogaster GN=Dis3 PE=2 SV=1;tr|Q9VC93|Q9VC93_DROME Dis3, isoform A OS=Drosophila melanogaster GN=Dis3 PE=1 SV	5	40	40	112.21	982	280.81	40.6	49.3	36.3	500610000	2013000000	734070000
Q9W0B8;O77285	tr|Q9W0B8|Q9W0B8_DROME Coatomer subunit alpha OS=Drosophila melanogaster GN=alphaCOP PE=1 SV=1;tr|O77285|O77285_DROME Coatomer subunit alpha OS=Drosophila melanogaster GN=alphaCOP PE=2 SV=1	2	53	53	139.33	1234	323.31	40.1	44.7	47.6	495460000	2257300000	4382000000
A0A0B4LG52;Q9W237	tr|A0A0B4LG52|A0A0B4LG52_DROME GEO08239p1 OS=Drosophila melanogaster GN=RpS16 PE=2 SV=1;sp|Q9W237|RS16_DROME 40S ribosomal protein S16 OS=Drosophila melanogaster GN=RpS16 PE=1 SV=1	2	17	17	16.774	148	64.97	67.6	74.3	74.3	479520000	3273300000	4761700000
F3YDH0;P29844;F6J5W4	tr|F3YDH0|F3YDH0_DROME Heat shock 70-kDa protein cognate 3, isoform E OS=Drosophila melanogaster GN=Hsc70-3 PE=1 SV=1;sp|P29844|HSP7C_DROME Heat shock 70 kDa protein cognate 3 OS=Drosophila melanogaster GN=Hsc70-3 PE=2 SV=2	3	32	28	72.26	656	210.86	48.3	40.1	46.5	471660000	1181900000	4160800000
P13060	sp|P13060|EF2_DROME Elongation factor 2 OS=Drosophila melanogaster GN=EF2 PE=1 SV=4	1	27	27	94.458	844	284.99	31.8	34.5	36	470970000	1566100000	2903100000
A4V303;P48605	tr|A4V303|A4V303_DROME T-complex protein 1 subunit gamma OS=Drosophila melanogaster GN=CCT3 PE=1 SV=1;sp|P48605|TCPG_DROME T-complex protein 1 subunit gamma OS=Drosophila melanogaster GN=Cctgamma PE=2 SV=2	2	32	32	59.394	544	323.31	47.8	50.2	58.8	467180000	1508900000	3025000000
X2JH42;L0MQ04;Q05825;Q6W4M9;Q6W4K9;D3DMY7;Q8IM98;Q8T4C4	tr|X2JH42|X2JH42_DROME ATP synthase subunit beta OS=Drosophila melanogaster GN=ATPsynbeta PE=1 SV=1;tr|L0MQ04|L0MQ04_DROME ATP synthase subunit beta OS=Drosophila melanogaster GN=ATPsynbeta PE=1 SV=1;sp|Q05825|ATPB_DROME ATP synthase subunit beta, mitochon	8	24	24	54.107	505	323.31	64.8	45	71.1	463660000	1231200000	3921700000
D1Z3A1;Q9VZS5;Q8MZI5;REV__Q9VGU6	tr|D1Z3A1|D1Z3A1_DROME MIP15344p OS=Drosophila melanogaster GN=RpL28 PE=1 SV=1;sp|Q9VZS5|RL28_DROME 60S ribosomal protein L28 OS=Drosophila melanogaster GN=RpL28 PE=1 SV=1;tr|Q8MZI5|Q8MZI5_DROME GH04183p OS=Drosophila melanogaster PE=2 SV=1	4	15	15	16.029	144	227.06	50.7	61.8	63.2	461680000	3664200000	5355800000
M9PB84;P31009	tr|M9PB84|M9PB84_DROME Ribosomal protein S2, isoform B OS=Drosophila melanogaster GN=RpS2 PE=3 SV=1;sp|P31009|RS2_DROME 40S ribosomal protein S2 OS=Drosophila melanogaster GN=RpS2 PE=1 SV=2	2	19	19	28.899	267	161.48	51.7	61	58.1	455140000	3321800000	5153300000
A0A0B4KHR6;Q8MT36	tr|A0A0B4KHR6|A0A0B4KHR6_DROME Histone-lysine N-methyltransferase OS=Drosophila melanogaster GN=NSD PE=4 SV=1;sp|Q8MT36|MES4_DROME Probable histone-lysine N-methyltransferase Mes-4 OS=Drosophila melanogaster GN=Mes-4 PE=1 SV=2	2	1	1	158.54	1423	-2	0.8	0.8	0.8	452170000	1895400000	1500300000
X2JC80;C6SV50;P38979	tr|X2JC80|X2JC80_DROME 40S ribosomal protein SA OS=Drosophila melanogaster GN=sta PE=1 SV=1;tr|C6SV50|C6SV50_DROME 40S ribosomal protein SA OS=Drosophila melanogaster GN=sta-RD PE=2 SV=1;sp|P38979|RSSA_DROME 40S ribosomal protein SA OS=Drosophila melanogas	3	17	17	30.228	270	313.31	69.3	74.4	83	449550000	2445500000	4057500000
H1UUI8;C6SUT3;Q95RJ9	tr|H1UUI8|H1UUI8_DROME FI17838p1 OS=Drosophila melanogaster GN=ebi-RA PE=2 SV=1;tr|C6SUT3|C6SUT3_DROME GM02335p OS=Drosophila melanogaster GN=ebi-RA PE=2 SV=1;sp|Q95RJ9|EBI_DROME F-box-like/WD repeat-containing protein ebi OS=Drosophila melanogaster GN=ebi	3	20	20	72.387	700	309.97	30.9	7.7	39.1	444880000	19935000	3057500000
X2JB48;D1Z385;Q26365;O62526	tr|X2JB48|X2JB48_DROME Stress-sensitive B, isoform E OS=Drosophila melanogaster GN=sesB PE=1 SV=1;tr|D1Z385|D1Z385_DROME SD21251p OS=Drosophila melanogaster GN=sesB-RD PE=2 SV=1;sp|Q26365|ADT_DROME ADP,ATP carrier protein OS=Drosophila melanogaster GN=sesB	4	17	17	32.909	299	53.515	48.5	50.8	62.9	424630000	528090000	1309400000
Q9VN44;Q86NQ0;Q960E2	tr|Q9VN44|Q9VN44_DROME FI07923p OS=Drosophila melanogaster GN=Karybeta3 PE=1 SV=1;tr|Q86NQ0|Q86NQ0_DROME GH07384p OS=Drosophila melanogaster GN=Karybeta3 PE=2 SV=1;tr|Q960E2|Q960E2_DROME SD05186p OS=Drosophila melanogaster GN=Karybeta3 PE=2 SV=1	3	27	27	123.56	1105	224.51	37.1	28.5	23.8	422990000	646220000	933560000
A0A0B4JD11;Q9NJH0	tr|A0A0B4JD11|A0A0B4JD11_DROME Ef1gamma, isoform C OS=Drosophila melanogaster GN=eEF1gamma PE=4 SV=1;sp|Q9NJH0|EF1G_DROME Elongation factor 1-gamma OS=Drosophila melanogaster GN=Ef1gamma PE=2 SV=2	2	23	23	48.967	431	323.31	54.5	47.6	58.5	410590000	1014600000	3467500000
M9PFF0;P41126	tr|M9PFF0|M9PFF0_DROME 60S ribosomal protein L13 OS=Drosophila melanogaster GN=RpL13 PE=1 SV=1;sp|P41126|RL13_DROME 60S ribosomal protein L13 OS=Drosophila melanogaster GN=RpL13 PE=1 SV=1	2	17	17	24.951	218	57.415	41.7	55.5	46.3	410420000	4069300000	4790100000
X2J5G6;P32100	tr|X2J5G6|X2J5G6_DROME Ribosomal protein L7, isoform B OS=Drosophila melanogaster GN=RpL7 PE=4 SV=1;sp|P32100|RL7_DROME 60S ribosomal protein L7 OS=Drosophila melanogaster GN=RpL7 PE=1 SV=2	2	16	16	29.552	252	232.4	49.2	54.8	55.2	407910000	4403200000	5462100000
Q9XZU1	sp|Q9XZU1|XPO2_DROME Exportin-2 OS=Drosophila melanogaster GN=Cse1 PE=2 SV=2	1	28	28	110.17	975	246.02	38.8	36.2	33.4	395260000	951890000	650860000
X2J950;Q03334	tr|X2J950|X2J950_DROME GEO04621p1 OS=Drosophila melanogaster GN=RpS13 PE=2 SV=1;sp|Q03334|RS13_DROME 40S ribosomal protein S13 OS=Drosophila melanogaster GN=RpS13 PE=1 SV=3	2	9	9	17.178	151	31.943	48.3	48.3	48.3	389500000	2371500000	3390500000
P50887	sp|P50887|RL22_DROME 60S ribosomal protein L22 OS=Drosophila melanogaster GN=RpL22 PE=1 SV=2	1	23	23	30.61	299	141.57	55.2	64.5	64.2	386110000	4193400000	5175600000
Q7K3J0	tr|Q7K3J0|Q7K3J0_DROME CG8258 OS=Drosophila melanogaster GN=CCT8 PE=1 SV=1	1	20	20	59.432	546	169.43	46.3	47.1	44.9	384920000	844590000	1712200000
P28668;H8F4R5	sp|P28668|SYEP_DROME Bifunctional glutamate/proline--tRNA ligase OS=Drosophila melanogaster GN=GluProRS PE=1 SV=2;tr|H8F4R5|H8F4R5_DROME FI18146p1 (Fragment) OS=Drosophila melanogaster GN=Aats-glupro-RB PE=2 SV=1	2	51	51	189.41	1714	244.72	33.1	28.6	37.4	384590000	1160100000	2892500000
O62621	sp|O62621|COPB2_DROME Coatomer subunit beta OS=Drosophila melanogaster GN=betaCOP PE=2 SV=2	1	28	28	102.71	914	289.08	33.5	39.6	40.7	379930000	1373400000	2009700000
P41093;Q4V4E7	sp|P41093|RL18A_DROME 60S ribosomal protein L18a OS=Drosophila melanogaster GN=RpL18A PE=1 SV=1	2	17	17	21.029	177	66.723	56.5	50.8	57.6	379730000	2879000000	3562200000
M9PDQ0;M9PBI5;M9PGV6;P13395	tr|M9PDQ0|M9PDQ0_DROME Alpha spectrin, isoform D OS=Drosophila melanogaster GN=alpha-Spec PE=4 SV=1;tr|M9PBI5|M9PBI5_DROME Alpha spectrin, isoform C OS=Drosophila melanogaster GN=alpha-Spec PE=4 SV=1;tr|M9PGV6|M9PGV6_DROME Alpha spectrin, isoform B OS=Dros	4	66	66	279.55	2425	323.31	30	23.6	34.7	371890000	786200000	2156100000
Q8IPX7	tr|Q8IPX7|Q8IPX7_DROME RE44908p OS=Drosophila melanogaster GN=Rrp40 PE=1 SV=1	1	19	19	25.026	232	170.33	73.3	70.7	72	370600000	1507400000	336690000
P17704	sp|P17704|RS17_DROME 40S ribosomal protein S17 OS=Drosophila melanogaster GN=RpS17 PE=1 SV=2	1	12	12	15.285	131	148.47	70.2	75.6	75.6	367290000	1817400000	2993000000
O97118;A1A6X4;Q9W0A8;Q0ZHI2;Q8SX05;REV__Q8SX05;REV__O97118;REV__A1A6X4;REV__Q9W0A8;REV__Q0ZHI2	tr|O97118|O97118_DROME Ribosomal protein L23a (Fragment) OS=Drosophila melanogaster GN=RpL23A PE=2 SV=1;tr|A1A6X4|A1A6X4_DROME IP17216p (Fragment) OS=Drosophila melanogaster GN=RpL23a PE=2 SV=1;tr|Q9W0A8|Q9W0A8_DROME FI01658p OS=Drosophila melanogaster GN=	10	16	16	28.626	269	121.11	42.8	43.5	47.6	366410000	4152200000	5375400000
Q8T0M9;Q9VQ61;Q8IPY3;H5V866;E4NKM3	tr|Q8T0M9|Q8T0M9_DROME Aspartate aminotransferase OS=Drosophila melanogaster GN=Got2 PE=2 SV=1;tr|Q9VQ61|Q9VQ61_DROME Aspartate aminotransferase OS=Drosophila melanogaster GN=Got2 PE=1 SV=1;tr|Q8IPY3|Q8IPY3_DROME Aspartate aminotransferase OS=Drosophila me	5	16	16	43.695	393	168.72	55.2	52.7	55.5	362570000	1056900000	1298700000
A0A0C4DHG2;Q07171;A0A0C4DHG6	tr|A0A0C4DHG2|A0A0C4DHG2_DROME Gelsolin, isoform J OS=Drosophila melanogaster GN=Gel PE=4 SV=1;sp|Q07171|GELS_DROME Gelsolin OS=Drosophila melanogaster GN=Gel PE=1 SV=2;tr|A0A0C4DHG6|A0A0C4DHG6_DROME Gelsolin, isoform L OS=Drosophila melanogaster GN=Gel PE	3	18	18	88.373	798	63.859	29.8	13.8	16.4	358610000	81729000	166290000
A4V391;P12613	tr|A4V391|A4V391_DROME Tcp1-like, isoform B OS=Drosophila melanogaster GN=CCT1 PE=1 SV=1;sp|P12613|TCPA_DROME T-complex protein 1 subunit alpha OS=Drosophila melanogaster GN=T-cp1 PE=2 SV=2	2	23	23	59.556	557	237.98	46	45.8	54.4	353280000	1308800000	3702500000
H8F4R0;Q23979	tr|H8F4R0|H8F4R0_DROME FI19407p1 (Fragment) OS=Drosophila melanogaster GN=Myo61F-RA PE=2 SV=1;sp|Q23979|MY61F_DROME Myosin-IB OS=Drosophila melanogaster GN=Myo61F PE=1 SV=3	2	19	19	122.89	1073	93.181	25.2	7.8	6.7	348680000	40413000	58954000
P08841	sp|P08841|TBB3_DROME Tubulin beta-3 chain OS=Drosophila melanogaster GN=betaTub60D PE=2 SV=2	1	23	1	50.849	454	323.31	58.6	65.6	65.6	347500000	1105000000	2703900000
Q9VAY2;Q1RKX0	tr|Q9VAY2|Q9VAY2_DROME Glycoprotein 93 OS=Drosophila melanogaster GN=Gp93 PE=1 SV=1	2	29	29	90.238	787	273.44	35.8	36	34.2	344360000	1111100000	1332600000
Q9VK69	tr|Q9VK69|Q9VK69_DROME T-complex protein 1 subunit delta OS=Drosophila melanogaster GN=CCT4 PE=1 SV=1	1	21	21	57.116	533	164.3	38.5	43.9	43.2	337010000	1175100000	2776100000
X2JCS6;P46223	tr|X2JCS6|X2JCS6_DROME Ribosomal protein L7A, isoform E OS=Drosophila melanogaster GN=RpL7A PE=4 SV=1;sp|P46223|RL7A_DROME 60S ribosomal protein L7a OS=Drosophila melanogaster GN=RpL7A PE=1 SV=2	2	18	18	30.731	271	225.21	48.3	48.7	48.7	336910000	3793800000	4208500000
P15348	sp|P15348|TOP2_DROME DNA topoisomerase 2 OS=Drosophila melanogaster GN=Top2 PE=1 SV=1	1	52	52	164.39	1447	257.85	26.3	36.8	30.3	336470000	2590300000	2320300000
A4V0N4;Q27331;V9GZU6;M9PD18;P48602;Q8T464;Q9VK47;Q8MXF7	tr|A4V0N4|A4V0N4_DROME MIP16230p OS=Drosophila melanogaster GN=Vha68-2 PE=1 SV=1;sp|Q27331|VATA2_DROME V-type proton ATPase catalytic subunit A isoform 2 OS=Drosophila melanogaster GN=Vha68-2 PE=1 SV=2	8	28	26	68.301	614	323.31	44.1	49.8	49	331520000	1050000000	1174700000
P35381	sp|P35381|ATPA_DROME ATP synthase subunit alpha, mitochondrial OS=Drosophila melanogaster GN=blw PE=1 SV=2	1	17	17	59.421	552	323.31	32.6	32.6	34.4	328470000	1011600000	1727400000
C6SUV6;O16797;C7LA69;E0R984	tr|C6SUV6|C6SUV6_DROME LP14077p (Fragment) OS=Drosophila melanogaster GN=RpL3-RA PE=2 SV=1;sp|O16797|RL3_DROME 60S ribosomal protein L3 OS=Drosophila melanogaster GN=RpL3 PE=1 SV=3;tr|C7LA69|C7LA69_DROME RE52161p OS=Drosophila melanogaster GN=RpL3-RB PE=2	4	28	28	47.131	418	179.88	41.6	61.5	61.2	327630000	3816600000	5753500000
A0A0B4LGZ5;P46222;Q4V5R3	tr|A0A0B4LGZ5|A0A0B4LGZ5_DROME Ribosomal protein L11, isoform B OS=Drosophila melanogaster GN=RpL11 PE=1 SV=1;sp|P46222|RL11_DROME 60S ribosomal protein L11 OS=Drosophila melanogaster GN=RpL11 PE=1 SV=2;tr|Q4V5R3|Q4V5R3_DROME IP06777p OS=Drosophila melanog	3	11	11	21.112	184	62.829	37.5	56.5	56.5	314890000	2026200000	2227400000
R9PY46;A8JV12;A8JV11;A0A023GPJ3;C7LA65;Q494J4;G2J654;B4YWD6;A9YJL2;F6JBF5	tr|R9PY46|R9PY46_DROME CG9650, isoform I OS=Drosophila melanogaster GN=Dmel\CG9650 PE=4 SV=1;tr|A8JV12|A8JV12_DROME CG9650, isoform G OS=Drosophila melanogaster GN=Dmel\CG9650 PE=4 SV=2;tr|A8JV11|A8JV11_DROME CG9650, isoform H OS=Drosophila melanogaster GN	10	13	13	128.28	1207	134.39	15.4	9.6	14.7	309870000	79910000	510150000
Q9VN25	sp|Q9VN25|EIF3A_DROME Eukaryotic translation initiation factor 3 subunit A OS=Drosophila melanogaster GN=eIF3a PE=1 SV=1	1	40	40	133.88	1140	212.28	28	29.2	34.7	309040000	757690000	2558600000
Q9W392	tr|Q9W392|Q9W392_DROME CG7033 OS=Drosophila melanogaster GN=CCT2 PE=1 SV=2	1	24	24	58.063	535	318.06	51.6	56.3	56.1	306490000	801390000	1716400000
Q9W2N0	sp|Q9W2N0|CAPZA_DROME F-actin-capping protein subunit alpha OS=Drosophila melanogaster GN=cpa PE=2 SV=1	1	11	11	32.759	286	222.87	41.3	35.3	48.6	305650000	173080000	1074000000
P41094;B6IDT0;Q4V607	sp|P41094|RS18_DROME 40S ribosomal protein S18 OS=Drosophila melanogaster GN=RpS18 PE=1 SV=1;tr|B6IDT0|B6IDT0_DROME FI09342p (Fragment) OS=Drosophila melanogaster GN=RpS18-RB PE=2 SV=1;tr|Q4V607|Q4V607_DROME IP07925p (Fragment) OS=Drosophila melanogaster G	3	15	15	17.611	152	218.82	48.7	61.8	61.8	301960000	1608300000	2978500000
L0CRF4;L0CPM0;L0CPL5;L0CPK9;A0A1B2AJL4;Q0E9B6;L0CPE3;L0CRF8;L0CR49;L0CR44;L0CQR2;L0CQQ8;L0CPD9;A1Z8U9;C4JD65	tr|L0CRF4|L0CRF4_DROME Ribosomal protein S11 (Fragment) OS=Drosophila melanogaster GN=RPS11 PE=3 SV=1;tr|L0CPM0|L0CPM0_DROME Ribosomal protein S11 (Fragment) OS=Drosophila melanogaster GN=RPS11 PE=3 SV=1;tr|L0CPL5|L0CPL5_DROME Ribosomal protein S11 (Fragme	15	14	14	17.242	151	103.34	50.3	58.3	58.3	296960000	2328700000	3558200000
Q7KN62;A0A0B4LFZ4;D0IQG4;Q8IGZ2	sp|Q7KN62|TERA_DROME Transitional endoplasmic reticulum ATPase TER94 OS=Drosophila melanogaster GN=TER94 PE=1 SV=1;tr|A0A0B4LFZ4|A0A0B4LFZ4_DROME TER94, isoform E OS=Drosophila melanogaster GN=TER94 PE=1 SV=1;tr|D0IQG4|D0IQG4_DROME AT24528p (Fragment) OS=D	4	27	27	88.858	801	206.77	32.2	36.5	32.1	296830000	1522300000	1459400000
H1ZYF1;P29327;D2NUH9;Q95TP9;A8E700	tr|H1ZYF1|H1ZYF1_DROME 40S ribosomal protein S6 OS=Drosophila melanogaster GN=RpS6 PE=3 SV=1;sp|P29327|RS6_DROME 40S ribosomal protein S6 OS=Drosophila melanogaster GN=RpS6 PE=1 SV=1;tr|D2NUH9|D2NUH9_DROME TA01224p (Fragment) OS=Drosophila melanogaster GN=	5	15	15	28.407	248	62.67	34.7	41.1	41.1	296770000	2474400000	2891900000
Q6AWF6;A8JQX3	tr|Q6AWF6|Q6AWF6_DROME GH03334p OS=Drosophila melanogaster GN=cu PE=2 SV=1;tr|A8JQX3|A8JQX3_DROME Curled, isoform D OS=Drosophila melanogaster GN=cu PE=4 SV=1	2	1	1	58.95	526	1.9884	1.9	1.9	1.9	295670000	883570000	596570000
A1ZBE9;Q8MRS4	tr|A1ZBE9|A1ZBE9_DROME Methionyl-tRNA synthetase OS=Drosophila melanogaster GN=MetRS PE=1 SV=1;tr|Q8MRS4|Q8MRS4_DROME AT05114p OS=Drosophila melanogaster GN=MetRS PE=2 SV=1	2	37	37	112.48	1022	277.44	44.5	49.9	49.9	292250000	499620000	1308800000
Q9VXQ5	tr|Q9VXQ5|Q9VXQ5_DROME GH13725p OS=Drosophila melanogaster GN=CCT6 PE=1 SV=1	1	22	22	58.246	533	151.75	39.4	44.7	44.7	289140000	1192200000	1950800000
X2JE06;Q9VJY6;Q8SY98	tr|X2JE06|X2JE06_DROME GEO07624p1 OS=Drosophila melanogaster GN=RpL24 PE=1 SV=1;sp|Q9VJY6|RL24_DROME 60S ribosomal protein L24 OS=Drosophila melanogaster GN=RpL24 PE=1 SV=1	3	11	11	17.52	155	32.987	31.6	38.1	38.1	287710000	2165400000	2320300000
R9Q794;Q9W5R8;Q6NL81;Q6NMY6;Q9NIU2	tr|R9Q794|R9Q794_DROME Ribosomal protein L5, isoform G OS=Drosophila melanogaster GN=RpL5 PE=1 SV=1;sp|Q9W5R8|RL5_DROME 60S ribosomal protein L5 OS=Drosophila melanogaster GN=RpL5 PE=1 SV=2;tr|Q6NL81|Q6NL81_DROME RE57391p OS=Drosophila melanogaster GN=yip6	5	17	17	34.036	299	96.48	52.2	44.8	44.8	284410000	2249500000	2637500000
X2JCX8;C0HKA1;C0HKA0	tr|X2JCX8|X2JCX8_DROME GEO12513p1 OS=Drosophila melanogaster GN=RpS14b PE=2 SV=1;sp|C0HKA1|RS14B_DROME 40S ribosomal protein S14b OS=Drosophila melanogaster GN=RpS14b PE=2 SV=1;sp|C0HKA0|RS14A_DROME 40S ribosomal protein S14a OS=Drosophila melanogaster GN=	3	10	10	16.265	151	268.55	53.6	50.3	68.9	283140000	2262000000	3489900000
Q9VW54	tr|Q9VW54|Q9VW54_DROME 26S proteasome regulatory complex subunit p97 OS=Drosophila melanogaster GN=Rpn1 PE=1 SV=2	1	26	26	102.28	919	225.6	27.3	31	30.5	282640000	1111400000	1857900000
M9PIM0;O61231	tr|M9PIM0|M9PIM0_DROME Ribosomal protein L10, isoform E OS=Drosophila melanogaster GN=RpL10 PE=4 SV=1;sp|O61231|RL10_DROME 60S ribosomal protein L10 OS=Drosophila melanogaster GN=RpL10 PE=1 SV=1	2	14	14	25.527	218	129.66	36.2	46.3	42.7	277220000	2764100000	3516300000
A0A0B4LFD9;Q8T3U2	tr|A0A0B4LFD9|A0A0B4LFD9_DROME GEO04460p1 OS=Drosophila melanogaster GN=RpS23 PE=2 SV=1;sp|Q8T3U2|RS23_DROME 40S ribosomal protein S23 OS=Drosophila melanogaster GN=RpS23 PE=1 SV=1	2	7	7	16.016	143	119.39	42.7	48.3	48.3	275120000	1527500000	2368400000
M9PHM6;Q9VS34	tr|M9PHM6|M9PHM6_DROME Ribosomal protein L18, isoform B OS=Drosophila melanogaster GN=RpL18 PE=4 SV=1;sp|Q9VS34|RL18_DROME 60S ribosomal protein L18 OS=Drosophila melanogaster GN=RpL18 PE=1 SV=1	2	10	10	21.664	188	99.299	43.6	51.1	51.1	269290000	3202000000	3395000000
M9MQH9;P36179;M9NDI6;H5V8B8;Q8MT47	tr|M9MQH9|M9MQH9_DROME Protein phosphatase 2A at 29B, isoform C OS=Drosophila melanogaster GN=Pp2A-29B PE=1 SV=1;sp|P36179|2AAA_DROME Serine/threonine-protein phosphatase PP2A 65 kDa regulatory subunit OS=Drosophila melanogaster GN=Pp2A-29B PE=2 SV=4;tr|M9	5	23	23	65.423	591	164.82	34.3	43.8	45	267930000	804880000	1741600000
P02572	sp|P02572|ACT2_DROME Actin-42A OS=Drosophila melanogaster GN=Act42A PE=1 SV=3	1	22	2	41.823	376	4.2886	59.3	58.8	58.8	265720000	215790000	265600000
C6SUW3;P55935;Q95RG1	tr|C6SUW3|C6SUW3_DROME LD13662p OS=Drosophila melanogaster GN=RpS9 PE=1 SV=1;sp|P55935|RS9_DROME 40S ribosomal protein S9 OS=Drosophila melanogaster GN=RpS9 PE=1 SV=2;tr|Q95RG1|Q95RG1_DROME GEO04282p1 OS=Drosophila melanogaster GN=RpS9 PE=1 SV=1	3	18	18	22.623	195	77.451	46.7	58.5	54.4	262610000	3161500000	3440800000
Q9V455;O76522;Q9UB78	tr|Q9V455|Q9V455_DROME Importin subunit alpha OS=Drosophila melanogaster GN=Kap-alpha3 PE=1 SV=1;tr|O76522|O76522_DROME Karyopherin alpha 3 (Fragment) OS=Drosophila melanogaster GN=Kap-alpha3 PE=2 SV=1;tr|Q9UB78|Q9UB78_DROME Importin subunit alpha OS=Droso	3	15	15	56.989	514	215.89	36.6	34	37.5	261440000	906650000	1370000000
Q9VCE7;Q8MRS5;O18359;Q95R71;D0IQG2;Q6IJB6	tr|Q9VCE7|Q9VCE7_DROME Krueppel target at 95D, isoform A OS=Drosophila melanogaster GN=KrT95D PE=1 SV=3;tr|Q8MRS5|Q8MRS5_DROME AT03104p OS=Drosophila melanogaster GN=KrT95D PE=1 SV=1;tr|O18359|O18359_DROME Putative Krueppel target gene protein OS=Drosophil	6	26	26	124.54	1175	271.99	20.9	21.3	29.4	259880000	482140000	2110900000
Q9V405;E1UIA5;Q9VH79;Q8MZ73	tr|Q9V405|Q9V405_DROME 26S proteasome regulatory complex subunit p48A OS=Drosophila melanogaster GN=Rpt3 PE=1 SV=1;tr|E1UIA5|E1UIA5_DROME CG16916 protein OS=Drosophila melanogaster GN=CG16916 PE=3 SV=1	4	21	21	46.998	413	111.96	33.9	46.5	47.7	258670000	689510000	1708800000
Q8MS31;A8DYH1	tr|Q8MS31|Q8MS31_DROME Muscle wasted, isoform D OS=Drosophila melanogaster GN=mute PE=2 SV=1;tr|A8DYH1|A8DYH1_DROME Muscle wasted, isoform C OS=Drosophila melanogaster GN=mute PE=4 SV=1	2	1	1	74.461	665	2.4813	1.4	1.4	1.4	258070000	1689300000	906050000
Q9W0E4;Q8IRH0;Q8IRH1;C8VUZ1;E8NH92;Q9GPG3;Q6AWR8	tr|Q9W0E4|Q9W0E4_DROME Aminopeptidase OS=Drosophila melanogaster GN=Psa PE=1 SV=1;tr|Q8IRH0|Q8IRH0_DROME LP21249p OS=Drosophila melanogaster GN=Psa PE=1 SV=1;tr|Q8IRH1|Q8IRH1_DROME FI19310p1 OS=Drosophila melanogaster GN=Psa PE=1 SV=1;tr|C8VUZ1|C8VUZ1_DROM	7	34	34	99.326	866	267.42	29.2	43.4	43.4	256340000	1540500000	3215800000
Q7M3J9	tr|Q7M3J9|Q7M3J9_DROME Tubulin beta-3 chain (Fragment) OS=Drosophila melanogaster PE=3 SV=1	1	9	1	18.244	163	176.75	62	62	62	256270000	908790000	1616100000
Q9W229	tr|Q9W229|Q9W229_DROME 40S ribosomal protein S24 OS=Drosophila melanogaster GN=RpS24 PE=1 SV=1	1	5	5	15.048	131	39.115	26.7	32.1	32.1	255840000	1449700000	1964600000
P45437	sp|P45437|COPB_DROME Coatomer subunit beta OS=Drosophila melanogaster GN=betaCOP PE=2 SV=2	1	23	23	107.41	964	229.47	27.4	32.9	37.3	253360000	845180000	1553700000
Q9VSD6;Q86NK4;Q7KIF8;Q95RH0	tr|Q9VSD6|Q9VSD6_DROME D-Importin 7/RanBP7 OS=Drosophila melanogaster GN=msk PE=1 SV=1;tr|Q86NK4|Q86NK4_DROME GH01576p OS=Drosophila melanogaster GN=msk PE=2 SV=1;tr|Q7KIF8|Q7KIF8_DROME Ran binding protein 7 OS=Drosophila melanogaster GN=msk PE=2 SV=1	4	23	23	119.31	1049	83.712	29.3	28.3	21.9	252170000	459700000	573760000
Q8MSW0	tr|Q8MSW0|Q8MSW0_DROME Isoleucyl-tRNA synthetase, isoform A OS=Drosophila melanogaster GN=IleRS PE=1 SV=1	1	40	40	141.1	1229	176.95	36	32.8	38	252060000	550960000	1501100000
X2JKU5;Q24186;Q9VFE4;A0A0B4K683	tr|X2JKU5|X2JKU5_DROME Ribosomal protein S5a, isoform B OS=Drosophila melanogaster GN=RpS5a PE=3 SV=1;sp|Q24186|RS5A_DROME 40S ribosomal protein S5a OS=Drosophila melanogaster GN=RpS5a PE=1 SV=1;sp|Q9VFE4|RS5B_DROME 40S ribosomal protein S5b OS=Drosophila	4	17	17	25.434	228	99.197	63.6	70.6	59.2	251040000	1569600000	2812300000
Q6LEH1	tr|Q6LEH1|Q6LEH1_DROME Tropomyosin gene 1 constant region, exon 9 (Fragment) OS=Drosophila melanogaster GN=Tm1 PE=3 SV=1	1	9	4	30.851	270	83.285	19.3	15.9	19.3	250830000	186060000	614610000
Q9VFF3;H9ZYN8;B3DN45	tr|Q9VFF3|Q9VFF3_DROME Rrp6, isoform B OS=Drosophila melanogaster GN=Rrp6 PE=1 SV=3;tr|H9ZYN8|H9ZYN8_DROME FI19715p1 (Fragment) OS=Drosophila melanogaster GN=Rrp6-RB PE=2 SV=1;tr|B3DN45|B3DN45_DROME LD13130p (Fragment) OS=Drosophila melanogaster GN=CG7292-	3	42	42	102.92	900	284.23	39.7	53.1	52.4	248750000	1472000000	3133200000
O61604;Q8IQZ8;Q8IQZ7;D0IQI3;D3DMF1;C7LAI0;Q95RN9	tr|O61604|O61604_DROME Fimbrin OS=Drosophila melanogaster GN=Fim PE=1 SV=1;tr|Q8IQZ8|Q8IQZ8_DROME FI20019p1 OS=Drosophila melanogaster GN=Fim PE=1 SV=1;tr|Q8IQZ7|Q8IQZ7_DROME FI19014p1 OS=Drosophila melanogaster GN=Fim PE=1 SV=1;tr|D0IQI3|D0IQI3_DROME SD23	7	18	18	71.913	640	87.882	35	33.6	25	248140000	464690000	427800000
A1Z713	sp|A1Z713|VPS13_DROME Vacuolar protein sorting-associated protein 13 OS=Drosophila melanogaster GN=Vps13 PE=1 SV=2	1	6	6	374.54	3321	17.105	2	0.3	0.3	246900000	4121800	5669500
A0A0B4KGR4;Q7KS38	tr|A0A0B4KGR4|A0A0B4KGR4_DROME Ribosomal protein S19b, isoform C OS=Drosophila melanogaster GN=RpS19b PE=4 SV=1;sp|Q7KS38|RS19B_DROME 40S ribosomal protein S19b OS=Drosophila melanogaster GN=RpS19b PE=2 SV=3	2	8	8	17.362	155	49.946	31	40	40	243180000	1715400000	1839800000
Q9W1B9;Q4V5X9	tr|Q9W1B9|Q9W1B9_DROME GEO07602p1 OS=Drosophila melanogaster GN=RpL12 PE=1 SV=1;tr|Q4V5X9|Q4V5X9_DROME IP07888p OS=Drosophila melanogaster GN=RpL12 PE=2 SV=1	2	9	9	17.673	165	239.89	49.7	55.2	55.2	242240000	2199000000	1459700000
Q9W1G7;Q24150	tr|Q9W1G7|Q9W1G7_DROME LD21576p OS=Drosophila melanogaster GN=Nap1 PE=1 SV=1;tr|Q24150|Q24150_DROME Nucleosome assembly protein NAP-1 OS=Drosophila melanogaster GN=Nap1 PE=1 SV=1	2	13	13	42.767	370	208.31	32.7	30.8	31.4	238160000	613920000	1485400000
O61380;A8DZ29;Q7YU50	tr|O61380|O61380_DROME Eukaryotic translation initiation factor 4G, isoform A OS=Drosophila melanogaster GN=eIF4G1 PE=1 SV=3;tr|A8DZ29|A8DZ29_DROME Eukaryotic translation initiation factor 4G, isoform B OS=Drosophila melanogaster GN=eIF4G1 PE=1 SV=1;tr|Q7Y	3	48	47	183.94	1666	323.31	25.1	5.1	37.2	235700000	30112000	2761200000
E1JJM9;P48149;Q7KR04	tr|E1JJM9|E1JJM9_DROME GEO07866p1 OS=Drosophila melanogaster GN=RpS15Aa PE=1 SV=1;sp|P48149|RS15A_DROME 40S ribosomal protein S15Aa OS=Drosophila melanogaster GN=RpS15Aa PE=1 SV=2;sp|Q7KR04|RS15B_DROME 40S ribosomal protein S15Ab OS=Drosophila melanogaster	3	8	8	14.771	130	79.543	45.4	50.8	50.8	234560000	1376100000	2118100000
Q9V9M7	tr|Q9V9M7|Q9V9M7_DROME RE62581p OS=Drosophila melanogaster GN=RpL21 PE=1 SV=1	1	9	9	18.476	159	31.668	35.2	42.1	42.1	233990000	1456800000	2687800000
M9NEQ9;D4G7H1;C0H6Z8;B7ZWP7;Q9VWG3;Q9VB14	tr|M9NEQ9|M9NEQ9_DROME Ribosomal protein S10b, isoform D OS=Drosophila melanogaster GN=RpS10b PE=1 SV=1;tr|D4G7H1|D4G7H1_DROME FI14147p (Fragment) OS=Drosophila melanogaster GN=RpS10b-RC PE=2 SV=1;tr|C0H6Z8|C0H6Z8_DROME GM15153p (Fragment) OS=Drosophila me	6	10	10	17.878	160	83.582	50.6	54.4	60.6	230280000	1550000000	2420100000
X2JDU0;P50882	tr|X2JDU0|X2JDU0_DROME Ribosomal protein L9, isoform C OS=Drosophila melanogaster GN=RpL9 PE=4 SV=1;sp|P50882|RL9_DROME 60S ribosomal protein L9 OS=Drosophila melanogaster GN=RpL9 PE=1 SV=2	2	10	10	21.392	190	66.799	52.6	64.2	70	227290000	1989500000	2330100000
Q9VTP4;Q8IGE1;Q8IGJ3	sp|Q9VTP4|R10AB_DROME 60S ribosomal protein L10a-2 OS=Drosophila melanogaster GN=RpL10Ab PE=1 SV=2;tr|Q8IGE1|Q8IGE1_DROME RH43519p OS=Drosophila melanogaster GN=RpL10Ab PE=2 SV=1;tr|Q8IGJ3|Q8IGJ3_DROME RH06366p OS=Drosophila melanogaster GN=RpL10Ab PE=2 SV	3	10	10	24.273	217	171.84	39.6	48.8	48.8	225110000	1821700000	1840200000
Q9VHL2	tr|Q9VHL2|Q9VHL2_DROME LD47396p OS=Drosophila melanogaster GN=CCT7 PE=1 SV=2	1	20	20	59.386	544	222.96	33.8	39.9	40.1	224960000	618090000	1174800000
Q9VCK0;Q8MRJ8;Q9VGC7	sp|Q9VCK0|EI3D1_DROME Eukaryotic translation initiation factor 3 subunit D-1 OS=Drosophila melanogaster GN=eIF3d1 PE=1 SV=1	3	20	20	63.797	560	306.49	35.7	38.8	38.2	224890000	945120000	1580400000
Q7KV70;M9PBL6;A8JNJ6;Q9VZQ3;Q7KV69;Q23980;Q99140;Q8MRH2;Q7KQ57	tr|Q7KV70|Q7KV70_DROME Karst, isoform C OS=Drosophila melanogaster GN=kst PE=1 SV=1;tr|M9PBL6|M9PBL6_DROME Karst, isoform G OS=Drosophila melanogaster GN=kst PE=1 SV=1;tr|A8JNJ6|A8JNJ6_DROME Karst, isoform E OS=Drosophila melanogaster GN=kst PE=1 SV=2;tr|Q	9	70	70	483.68	4207	323.31	17.2	3.8	20.3	223870000	49768000	1093500000
O62619	sp|O62619|KPYK_DROME Pyruvate kinase OS=Drosophila melanogaster GN=PyK PE=2 SV=2	1	26	26	57.44	533	322.08	45.6	50.3	50.3	219860000	2343100000	2850900000
Q8T0E7;Q8IQI3;F3YDN6	tr|Q8T0E7|Q8T0E7_DROME LD07457p OS=Drosophila melanogaster GN=Dmel\CG10984 PE=1 SV=1;tr|Q8IQI3|Q8IQI3_DROME Uncharacterized protein, isoform B OS=Drosophila melanogaster GN=Dmel\CG10984 PE=1 SV=2;tr|F3YDN6|F3YDN6_DROME RE08495p OS=Drosophila melanogaster G	3	16	16	71.18	640	323.31	27.7	23.9	28.9	219650000	274180000	924460000
A0A0B4LIJ0;P48601	tr|A0A0B4LIJ0|A0A0B4LIJ0_DROME Regulatory particle triple-A ATPase 2, isoform B OS=Drosophila melanogaster GN=Rpt2 PE=3 SV=1;sp|P48601|PRS4_DROME 26S proteasome regulatory subunit 4 OS=Drosophila melanogaster GN=Rpt2 PE=1 SV=2	2	16	16	49.323	439	86.535	34.2	31.9	36.9	216700000	600790000	1214000000
Q9U9Q4	sp|Q9U9Q4|EIF3H_DROME Eukaryotic translation initiation factor 3 subunit H OS=Drosophila melanogaster GN=eIF3h PE=1 SV=2	1	12	12	38.407	338	131.84	34	38.5	38.5	216440000	1077400000	1572200000
A0A0B4LFL2;A1ZAX1	tr|A0A0B4LFL2|A0A0B4LFL2_DROME Eukaryotic translation initiation factor 3 subunit C OS=Drosophila melanogaster GN=eIF3c PE=3 SV=1;sp|A1ZAX1|EIF3C_DROME Eukaryotic translation initiation factor 3 subunit C OS=Drosophila melanogaster GN=eIF3c PE=1 SV=1	2	31	31	105.65	910	158.97	22.9	25.4	27	216300000	741990000	1670100000
D3DMH8;C9QP42;Q02748;C8VV33;Q9VHS8	tr|D3DMH8|D3DMH8_DROME RE22480p OS=Drosophila melanogaster GN=eIF-4a-RD PE=2 SV=1;tr|C9QP42|C9QP42_DROME Eukaryotic initiation factor 4a, isoform E OS=Drosophila melanogaster GN=eIF4A PE=1 SV=1;sp|Q02748|IF4A_DROME Eukaryotic initiation factor 4A OS=Drosop	5	17	17	45.904	403	219.64	44.4	47.6	47.6	215520000	799090000	2659300000
O18332;Q8MRA4	tr|O18332|O18332_DROME FI01544p OS=Drosophila melanogaster GN=Rab1 PE=1 SV=1	2	10	9	22.762	205	50.961	46.8	62.4	52.2	214970000	409110000	977710000
M9PD75;Q94920	tr|M9PD75|M9PD75_DROME Porin, isoform D OS=Drosophila melanogaster GN=porin PE=4 SV=1;sp|Q94920|VDAC_DROME Voltage-dependent anion-selective channel OS=Drosophila melanogaster GN=porin PE=1 SV=3	2	14	14	30.55	282	299.57	46.5	48.6	60.3	213560000	523290000	1171100000
Q9V9W2;Q9V9W3	tr|Q9V9W2|Q9V9W2_DROME Ribosomal protein L6, isoform A OS=Drosophila melanogaster GN=RpL6 PE=1 SV=1;tr|Q9V9W3|Q9V9W3_DROME RE08669p OS=Drosophila melanogaster GN=RpL6 PE=1 SV=1	2	14	14	27.697	243	117.29	39.5	46.9	46.9	210520000	2631600000	2903600000
M9PG62;P25161;B1Q010;A8E6V2	tr|M9PG62|M9PG62_DROME Regulatory particle non-ATPase 3, isoform B OS=Drosophila melanogaster GN=Rpn3 PE=1 SV=1;sp|P25161|PSMD3_DROME Probable 26S proteasome non-ATPase regulatory subunit 3 OS=Drosophila melanogaster GN=Rpn3 PE=2 SV=1	4	26	26	56.003	494	117.76	35.2	47.8	46.4	210050000	750950000	1080500000
E2QCG7;Q0E940	tr|E2QCG7|E2QCG7_DROME Eukaryotic translation initiation factor 3 subunit B OS=Drosophila melanogaster GN=eIF3b PE=1 SV=1;sp|Q0E940|EIF3B_DROME Eukaryotic translation initiation factor 3 subunit B OS=Drosophila melanogaster GN=eIF3b PE=1 SV=1	2	23	23	80.44	690	116.66	34.8	33.6	37.8	209200000	463600000	1817700000
Q8T6I0;Q8T8W3;Q8IGN0;Q94919;C6SUU3	tr|Q8T6I0|Q8T6I0_DROME EH domain containing protein OS=Drosophila melanogaster GN=Past1 PE=1 SV=1;tr|Q8T8W3|Q8T8W3_DROME AT21416p OS=Drosophila melanogaster GN=Past1 PE=1 SV=1;tr|Q8IGN0|Q8IGN0_DROME RE59368p OS=Drosophila melanogaster GN=Past1 PE=2 SV=1;tr	5	22	22	61.004	534	108.55	36.7	36.7	47.4	209000000	287350000	1179300000
A0A0B4KGP8;Q24208;Q53XD3;I0DHL3;P45975	tr|A0A0B4KGP8|A0A0B4KGP8_DROME Eukaryotic initiation factor 2gamma, isoform D OS=Drosophila melanogaster GN=eIF2gamma PE=4 SV=1;sp|Q24208|IF2G_DROME Eukaryotic translation initiation factor 2 subunit 3 OS=Drosophila melanogaster GN=eIF2gamma PE=2 SV=1;tr|Q	5	19	19	51.484	475	123.2	39.6	44.6	53.1	204700000	1064000000	1634200000
Q9W499;Q8MT59;C6SV02	tr|Q9W499|Q9W499_DROME FI02809p OS=Drosophila melanogaster GN=RpL35 PE=1 SV=2;tr|Q8MT59|Q8MT59_DROME RE09547p OS=Drosophila melanogaster GN=RpL35 PE=2 SV=1;tr|C6SV02|C6SV02_DROME GH20886p (Fragment) OS=Drosophila melanogaster GN=RpL35-RA PE=2 SV=1	3	2	2	14.449	123	84.219	10.6	17.1	17.1	203860000	482940000	678100000
Q7KKI0;A1Z8U4;C8VV32	tr|Q7KKI0|Q7KKI0_DROME GM12270p OS=Drosophila melanogaster GN=CCT5 PE=1 SV=1;tr|A1Z8U4|A1Z8U4_DROME T-complex chaperonin 5, isoform B OS=Drosophila melanogaster GN=CCT5 PE=1 SV=1;tr|C8VV32|C8VV32_DROME AT19618p (Fragment) OS=Drosophila melanogaster GN=Cct5	3	18	18	59.278	542	247.46	41.3	41.7	41.7	203710000	603030000	2038600000
A0A1B3Q3N5;P48588	tr|A0A1B3Q3N5|A0A1B3Q3N5_DROME GEO07404p1 (Fragment) OS=Drosophila melanogaster PE=2 SV=1;sp|P48588|RS25_DROME 40S ribosomal protein S25 OS=Drosophila melanogaster GN=RpS25 PE=1 SV=3	2	5	5	13.201	117	63.131	35	35	35	203350000	1360000000	2466500000
Q9W1M9;Q8MSZ7;M9THE4	tr|Q9W1M9|Q9W1M9_DROME Rrp4, isoform A OS=Drosophila melanogaster GN=Rrp4 PE=1 SV=1;tr|Q8MSZ7|Q8MSZ7_DROME GM02257p OS=Drosophila melanogaster GN=Rrp4 PE=2 SV=1;tr|M9THE4|M9THE4_DROME FI19702p1 (Fragment) OS=Drosophila melanogaster GN=Rrp4-RA PE=2 SV=1	3	11	11	33.624	298	166.03	36.2	44.6	29.2	200780000	1118500000	213250000
Q9VJ19;Q8MT23;B5RIJ9	tr|Q9VJ19|Q9VJ19_DROME RE25263p OS=Drosophila melanogaster GN=RpL30 PE=1 SV=1;tr|Q8MT23|Q8MT23_DROME RH09938p OS=Drosophila melanogaster GN=RpL30 PE=2 SV=1;tr|B5RIJ9|B5RIJ9_DROME FI02875p (Fragment) OS=Drosophila melanogaster PE=2 SV=1	3	8	8	12.234	111	224.31	60.4	61.3	61.3	200540000	1578300000	1619200000
M9PGX7;Q9W058;C8VV34	tr|M9PGX7|M9PGX7_DROME Succinyl-CoA:3-ketoacid-coenzyme A transferase OS=Drosophila melanogaster GN=SCOT PE=1 SV=1;sp|Q9W058|SCOT_DROME Succinyl-CoA:3-ketoacid-coenzyme A transferase, mitochondrial OS=Drosophila melanogaster GN=SCOT PE=1 SV=1;tr|C8VV34|C8V	3	1	1	47.967	450	2.4314	2.2	2.2	2.2	196020000	822090000	693270000
Q9V3G1;Q4V4W5	sp|Q9V3G1|RL8_DROME 60S ribosomal protein L8 OS=Drosophila melanogaster GN=RpL8 PE=1 SV=1;tr|Q4V4W5|Q4V4W5_DROME IP12501p (Fragment) OS=Drosophila melanogaster GN=CG31664 PE=2 SV=1	2	14	14	27.892	256	200.62	34	49.2	40.2	193740000	2388400000	2643300000
Q9W414;Q8SZ19;C1C3F8;Q9U7A2;Q9VTQ9	tr|Q9W414|Q9W414_DROME Regulatory particle triple-A ATPase 4 OS=Drosophila melanogaster GN=Rpt4 PE=1 SV=3;tr|Q8SZ19|Q8SZ19_DROME RE23388p OS=Drosophila melanogaster GN=Rpt4 PE=2 SV=1;tr|C1C3F8|C1C3F8_DROME LP16188p (Fragment) OS=Drosophila melanogaster GN=	5	18	18	44.911	397	102.15	30.5	43.6	49.1	190980000	737640000	1417700000
A0A1B2AKQ4;P45594	tr|A0A1B2AKQ4|A0A1B2AKQ4_DROME GEO10457p1 (Fragment) OS=Drosophila melanogaster PE=2 SV=1;sp|P45594|CADF_DROME Cofilin/actin-depolymerizing factor homolog OS=Drosophila melanogaster GN=tsr PE=1 SV=1	2	11	11	17.153	148	49.99	48	56.1	64.2	189570000	683410000	2519400000
Q9VB46;Q8MT56;Q24160;Q58SN2;Q58SN1;Q58SN4;Q58SN3;Q58SM9;Q58SM8;Q58SN0;D2NUG9	tr|Q9VB46|Q9VB46_DROME FI18644p1 OS=Drosophila melanogaster GN=Hmu PE=1 SV=1;tr|Q8MT56|Q8MT56_DROME RE16762p OS=Drosophila melanogaster GN=Hmu PE=2 SV=1;tr|Q24160|Q24160_DROME Hemomucin OS=Drosophila melanogaster GN=Hmu PE=2 SV=1;tr|Q58SN2|Q58SN2_DROME Hem	11	12	12	63.415	579	102.75	27.6	29.5	29.5	189420000	489800000	680340000
Q8IGC5;Q8IP94;Q9VKB0;Q8MRL7	tr|Q8IGC5|Q8IGC5_DROME RH56418p OS=Drosophila melanogaster GN=ThrRS PE=2 SV=1;tr|Q8IP94|Q8IP94_DROME Threonyl-tRNA synthetase, isoform B OS=Drosophila melanogaster GN=ThrRS PE=1 SV=1;tr|Q9VKB0|Q9VKB0_DROME FI05224p OS=Drosophila melanogaster GN=ThrRS PE=1	4	22	22	81.628	711	159.57	32.5	31.6	31.5	188970000	642700000	1031900000
X2JIQ5;Q9W3W8	tr|X2JIQ5|X2JIQ5_DROME Ribosomal protein L17, isoform E OS=Drosophila melanogaster GN=RpL17 PE=3 SV=1;sp|Q9W3W8|RL17_DROME 60S ribosomal protein L17 OS=Drosophila melanogaster GN=RpL17 PE=1 SV=1	2	10	10	21.593	186	78.823	30.1	34.4	34.4	188250000	1207200000	1296600000
A0A0B4LGB7;E8NHA8;P22700	tr|A0A0B4LGB7|A0A0B4LGB7_DROME Calcium-transporting ATPase OS=Drosophila melanogaster GN=SERCA PE=1 SV=1;tr|E8NHA8|E8NHA8_DROME Calcium-transporting ATPase OS=Drosophila melanogaster GN=Ca-P60A-RC PE=2 SV=1;sp|P22700|ATC1_DROME Calcium-transporting ATPase	3	22	22	109.35	999	156.82	20.7	24.4	24.2	188150000	760580000	1261800000
G4LU37;Q8I0G5;A0A0B4KHL2	tr|G4LU37|G4LU37_DROME Coatomer subunit gamma OS=Drosophila melanogaster GN=gammaCop-RA PE=2 SV=1;sp|Q8I0G5|COPG_DROME Coatomer subunit gamma OS=Drosophila melanogaster GN=gammaCOP PE=2 SV=1;tr|A0A0B4KHL2|A0A0B4KHL2_DROME Coatomer subunit gamma OS=Drosophi	3	21	21	97.246	879	117.01	33	34.9	34.9	187320000	537290000	743310000
A4V4A5;Q9VZ23	tr|A4V4A5|A4V4A5_DROME GTP-binding nuclear protein OS=Drosophila melanogaster GN=Ran PE=1 SV=1;sp|Q9VZ23|RAN_DROME GTP-binding nuclear protein Ran OS=Drosophila melanogaster GN=Ran PE=1 SV=1	2	11	11	24.708	216	75.283	40.3	56.5	64.4	186740000	1248300000	1385800000
M9PBN7;P48603	tr|M9PBN7|M9PBN7_DROME Capping protein beta, isoform B OS=Drosophila melanogaster GN=cpb PE=4 SV=1;sp|P48603|CAPZB_DROME F-actin-capping protein subunit beta OS=Drosophila melanogaster GN=cpb PE=2 SV=1	2	10	10	31.363	276	71.689	42.4	34.1	42.4	183430000	83037000	433910000
A0A0B4KHE9;A0A0B4KI10;Q9V3P6	tr|A0A0B4KHE9|A0A0B4KHE9_DROME Regulatory particle non-ATPase 2, isoform C OS=Drosophila melanogaster GN=Rpn2 PE=4 SV=1;tr|A0A0B4KI10|A0A0B4KI10_DROME Regulatory particle non-ATPase 2, isoform B OS=Drosophila melanogaster GN=Rpn2 PE=4 SV=1;sp|Q9V3P6|PSMD1_	3	20	20	113.2	1020	84.915	20.4	24.6	24.6	182790000	562690000	795840000
M9PDC7;O61639;Q8INU2;M9PBF6;O61618;Q1WWC9;Q9VIF7;M9ND00;Q8T068;Q494K0	tr|M9PDC7|M9PDC7_DROME Dynamin associated protein 160, isoform H OS=Drosophila melanogaster GN=Dap160 PE=1 SV=1;tr|O61639|O61639_DROME Dynamin associated protein isoform Dap160-2 OS=Drosophila melanogaster GN=Dap160 PE=2 SV=1;tr|Q8INU2|Q8INU2_DROME Dynamin	10	21	21	110.98	1005	309.71	27.7	10.3	28.2	181990000	74029000	1169900000
Q9V597	sp|Q9V597|RL31_DROME 60S ribosomal protein L31 OS=Drosophila melanogaster GN=RpL31 PE=1 SV=1	1	9	9	14.532	124	45.045	48.4	49.2	42.7	181830000	1184600000	1515100000
Q9VKM7;Q9VKM8	tr|Q9VKM7|Q9VKM7_DROME AT01533p OS=Drosophila melanogaster GN=Dmel\CG33129 PE=1 SV=2	2	13	13	75.68	677	60.496	19.6	19.4	19.8	181410000	477020000	635590000
O77410;Q8MR88	sp|O77410|EIF3E_DROME Eukaryotic translation initiation factor 3 subunit E OS=Drosophila melanogaster GN=eIF3e PE=1 SV=1;tr|Q8MR88|Q8MR88_DROME Eukaryotic translation initiation factor 3 subunit E OS=Drosophila melanogaster GN=eIF3e PE=2 SV=1	2	15	15	51.162	435	198.56	32.2	34	32.6	180400000	447140000	638660000
Q9VHN7;Q7KSU6;Q95S19;Q9VVP4;Q8MZ62	tr|Q9VHN7|Q9VHN7_DROME CG8036, isoform B OS=Drosophila melanogaster GN=anon-WO0118547.344 PE=1 SV=3;tr|Q7KSU6|Q7KSU6_DROME CG8036, isoform D OS=Drosophila melanogaster GN=anon-WO0118547.344 PE=1 SV=1	5	28	28	68.031	626	190.39	39	57.5	60.1	179240000	692900000	1742300000
Q8IGR0;P15357;Q24576;Q24577;Q8MT02;Q9W418;A4V1F9;Q8MSM5;P0CG69;Q7JPZ3;Q7JPZ2;Q27927;Q24575;H9BVD7;H9BVD5;H9BVD4;H9BVD3;H9BVD2;R9PY16	tr|Q8IGR0|Q8IGR0_DROME RE44350p OS=Drosophila melanogaster GN=aru PE=2 SV=1;sp|P15357|RS27A_DROME Ubiquitin-40S ribosomal protein S27a OS=Drosophila melanogaster GN=RpS27A PE=1 SV=2;tr|Q24576|Q24576_DROME D.melanogaster ubiquitin (Fragment) OS=Drosophila m	19	6	2	17.94	156	76.103	38.5	50.6	38.5	178200000	896220000	1077800000
Q7JZW2;A1ZAH8	tr|Q7JZW2|Q7JZW2_DROME GEO07301p1 OS=Drosophila melanogaster GN=RpS15 PE=1 SV=1;tr|A1ZAH8|A1ZAH8_DROME Ribosomal protein S15, isoform B OS=Drosophila melanogaster GN=RpS15 PE=1 SV=1	2	8	8	17.037	148	45.726	48.6	68.2	55.4	175860000	526250000	1437000000
Q9VGP4;Q6NLJ0	tr|Q9VGP4|Q9VGP4_DROME LP08082p OS=Drosophila melanogaster GN=Ranbp9 PE=1 SV=1	2	26	26	114.41	1018	242.72	26	27.6	31.8	173820000	527940000	964460000
A0A0B4LFB3;Q7JVI3	tr|A0A0B4LFB3|A0A0B4LFB3_DROME Eukaryotic translation initiation factor 3 subunit M OS=Drosophila melanogaster GN=eIF3m PE=3 SV=1;sp|Q7JVI3|EIF3M_DROME Eukaryotic translation initiation factor 3 subunit M OS=Drosophila melanogaster GN=eIF3m PE=2 SV=1	2	19	19	44.086	387	223.1	51.4	48.6	56.3	172580000	401480000	939480000
Q9V9Q4;E8NH58	tr|Q9V9Q4|Q9V9Q4_DROME CG1416, isoform A OS=Drosophila melanogaster GN=Dmel\CG1416 PE=1 SV=2	2	13	13	40.154	354	228.68	21.2	28.2	37.6	170600000	722780000	1827000000
Q95TW1;Q9VGZ2	tr|Q95TW1|Q95TW1_DROME GM01970p OS=Drosophila melanogaster GN=Rrp46 PE=2 SV=1;tr|Q9VGZ2|Q9VGZ2_DROME FI06805p OS=Drosophila melanogaster GN=Rrp46 PE=1 SV=3	2	7	7	25.781	233	154.38	29.6	42.1	29.6	169060000	847580000	248790000
Q9V3V6;Q9XZC3	tr|Q9V3V6|Q9V3V6_DROME 26S proteasome regulatory complex subunit p50 OS=Drosophila melanogaster GN=Rpt5 PE=1 SV=1;tr|Q9XZC3|Q9XZC3_DROME Tat-binding protein-1 OS=Drosophila melanogaster GN=Rpt5 PE=1 SV=1	2	20	19	47.806	428	118.53	41.6	51.4	47.7	166620000	629230000	1236700000
A0A1B2AL12;P55828	tr|A0A1B2AL12|A0A1B2AL12_DROME GEO11434p1 (Fragment) OS=Drosophila melanogaster PE=2 SV=1;sp|P55828|RS20_DROME 40S ribosomal protein S20 OS=Drosophila melanogaster GN=RpS20 PE=1 SV=1	2	5	5	13.488	120	34.163	35	35	35	166470000	808350000	1260600000
M9PEC8;M9PEN4;M9PBQ3;P37276;M9PE73;M9PBQ0;M9PHG8;Q1EBX0	tr|M9PEC8|M9PEC8_DROME Dynein heavy chain 64C, isoform G OS=Drosophila melanogaster GN=Dhc64C PE=1 SV=1;tr|M9PEN4|M9PEN4_DROME Dynein heavy chain 64C, isoform F OS=Drosophila melanogaster GN=Dhc64C PE=1 SV=1;tr|M9PBQ3|M9PBQ3_DROME Dynein heavy chain 64C, i	8	60	60	531.12	4648	243.34	12.9	5.2	15.3	165280000	82455000	771610000
M9PG47;P13008	tr|M9PG47|M9PG47_DROME 40S ribosomal protein S26 OS=Drosophila melanogaster GN=RpS26 PE=3 SV=1;sp|P13008|RS26_DROME 40S ribosomal protein S26 OS=Drosophila melanogaster GN=RpS26 PE=1 SV=1	2	4	4	13.266	114	14.722	37.7	37.7	37.7	164580000	984900000	1479400000
P21187	sp|P21187|PABP_DROME Polyadenylate-binding protein OS=Drosophila melanogaster GN=pAbp PE=1 SV=3	1	23	23	69.925	634	296.54	35.5	29.2	52.4	164500000	336490000	3111400000
O01349	tr|O01349|O01349_DROME Kinesin-73 OS=Drosophila melanogaster GN=Khc-73 PE=2 SV=1	1	26	1	215.05	1921	238.47	13.5	10.5	17.6	164480000	263950000	1312700000
Q59E30;Q24036;Q95RI5;M9PFH6;M9PFW1;Q59E29;Q86BI4;C6TPC0	tr|Q59E30|Q59E30_DROME Failed axon connections, isoform C OS=Drosophila melanogaster GN=fax PE=1 SV=1;tr|Q24036|Q24036_DROME Failed axon connections protein OS=Drosophila melanogaster GN=fax PE=2 SV=1;sp|Q95RI5|FAXC_DROME Failed axon connections OS=Drosoph	8	14	14	46.643	415	79.552	31.6	40	43.4	164260000	285500000	591020000
Q9VW53;Q5BID5	tr|Q9VW53|Q9VW53_DROME FI01414p OS=Drosophila melanogaster GN=Mtr3 PE=1 SV=1;tr|Q5BID5|Q5BID5_DROME RE29317p OS=Drosophila melanogaster GN=Mtr3 PE=2 SV=1	2	14	14	36.611	326	178.04	37.4	43.9	34.4	160230000	855370000	265050000
A1Z9E3;Q86NS6;Q95TV3	tr|A1Z9E3|A1Z9E3_DROME Elongation factor Tu OS=Drosophila melanogaster GN=mEFTu1 PE=1 SV=1;tr|Q86NS6|Q86NS6_DROME Elongation factor Tu OS=Drosophila melanogaster GN=EfTuM PE=2 SV=1;tr|Q95TV3|Q95TV3_DROME GM14682p OS=Drosophila melanogaster GN=mEFTu1 PE=2 S	3	12	12	53.992	489	120.46	28.6	30.7	30.7	155470000	649040000	1088900000
Q9VVU2	tr|Q9VVU2|Q9VVU2_DROME GEO07453p1 OS=Drosophila melanogaster GN=RpL26 PE=1 SV=1	1	9	9	17.281	149	29.145	34.9	45	45	154850000	1328900000	1114800000
Q7KN94;Q7KLW5	tr|Q7KN94|Q7KN94_DROME Walrus, isoform A OS=Drosophila melanogaster GN=wal PE=1 SV=1;tr|Q7KLW5|Q7KLW5_DROME LD07532p (Fragment) OS=Drosophila melanogaster GN=wal PE=2 SV=1	2	15	15	34.181	330	92.98	42.4	51.2	51.2	153410000	411700000	845410000
Q9W1H8;O77466	tr|Q9W1H8|Q9W1H8_DROME GH13256p OS=Drosophila melanogaster GN=Thiolase PE=1 SV=1;tr|O77466|O77466_DROME Thiolase OS=Drosophila melanogaster GN=Thiolase PE=2 SV=1	2	14	14	50.641	469	94.243	28.8	28.6	34.5	152370000	424110000	1054000000
E1JJ68;C7LAE4;P19109;A0A0B4K624;A0A0B4K6A3;A0A0B4K6K1;A0A0B4K6T7;I0B1P2	tr|E1JJ68|E1JJ68_DROME Rm62, isoform H OS=Drosophila melanogaster GN=Rm62 PE=1 SV=1;tr|C7LAE4|C7LAE4_DROME LP18603p OS=Drosophila melanogaster GN=Rm62 PE=1 SV=1;sp|P19109|DDX17_DROME ATP-dependent RNA helicase p62 OS=Drosophila melanogaster GN=Rm62 PE=1 SV	8	23	21	62.473	575	213.23	38.1	44.2	46.3	151440000	857350000	1193200000
Q9V3G7	sp|Q9V3G7|PSMD6_DROME 26S proteasome non-ATPase regulatory subunit 6 OS=Drosophila melanogaster GN=Rpn7 PE=2 SV=1	1	12	12	45.38	389	126.65	33.7	33.7	31.4	150390000	313430000	387900000
Q8IPE8;Q9V397	tr|Q8IPE8|Q8IPE8_DROME Mitochondrial trifunctional protein alpha subunit, isoform B OS=Drosophila melanogaster GN=Mtpalpha PE=1 SV=1;tr|Q9V397|Q9V397_DROME BcDNA.GH12558 OS=Drosophila melanogaster GN=Mtpalpha PE=1 SV=1	2	24	24	79.637	744	163.63	27.8	32.9	41.9	150290000	456990000	1481000000
Q9VD29;Q95SY7;Q9NFN8	tr|Q9VD29|Q9VD29_DROME RE74312p OS=Drosophila melanogaster GN=Sar1 PE=1 SV=1;tr|Q95SY7|Q95SY7_DROME LD39266p OS=Drosophila melanogaster GN=Sar1 PE=2 SV=1;tr|Q9NFN8|Q9NFN8_DROME Putative Sar1 protein OS=Drosophila melanogaster GN=Sar1 PE=3 SV=1	3	7	7	21.811	193	78.852	49.2	49.2	49.2	149600000	623810000	560320000
M9PBK5;P08570	tr|M9PBK5|M9PBK5_DROME Ribosomal protein LP1, isoform B OS=Drosophila melanogaster GN=RpLP1 PE=3 SV=1;sp|P08570|RLA1_DROME 60S acidic ribosomal protein P1 OS=Drosophila melanogaster GN=RpLP1 PE=1 SV=2	2	6	6	11.513	112	49.239	71.4	88.4	70.5	148430000	984800000	516020000
Q9VQ78;Q7KN66	tr|Q9VQ78|Q9VQ78_DROME LD16031p OS=Drosophila melanogaster GN=TBCD PE=1 SV=1;tr|Q7KN66|Q7KN66_DROME Uncharacterized protein OS=Drosophila melanogaster GN=TBCD PE=2 SV=1	2	23	23	134.51	1189	149.14	21.4	21	25.2	147530000	441350000	710230000
P91926;E8NH12	sp|P91926|AP2A_DROME AP-2 complex subunit alpha OS=Drosophila melanogaster GN=AP-2alpha PE=1 SV=1;tr|E8NH12|E8NH12_DROME AP-2 complex subunit alpha OS=Drosophila melanogaster GN=alpha-Adaptin-RB PE=2 SV=1	2	19	19	105.62	940	75.183	22.4	18.9	21.2	146590000	260030000	477900000
Q5U0U9;A1Z7J7;A1Z7J6;A0A0B4LEY1;A0A0B4LEZ1;Q961K5	tr|Q5U0U9|Q5U0U9_DROME AT25839p OS=Drosophila melanogaster GN=Sec31 PE=2 SV=1;tr|A1Z7J7|A1Z7J7_DROME Sec31 ortholog, isoform A OS=Drosophila melanogaster GN=Sec31 PE=1 SV=1;tr|A1Z7J6|A1Z7J6_DROME Sec31 ortholog, isoform B OS=Drosophila melanogaster GN=Sec3	6	19	19	135.99	1240	108.41	13.8	16.5	19.4	144240000	282740000	685190000
Q8IGE9;Q9VN21	tr|Q8IGE9|Q8IGE9_DROME RH35990p (Fragment) OS=Drosophila melanogaster GN=lost PE=2 SV=1;tr|Q9VN21|Q9VN21_DROME LD30155p OS=Drosophila melanogaster GN=lost PE=1 SV=1	2	22	22	58.783	534	196.61	33	30.3	43.6	143810000	556350000	1423900000
Q9VK19;Q8SYC8	tr|Q9VK19|Q9VK19_DROME FI07225p OS=Drosophila melanogaster GN=Ski6 PE=1 SV=1;tr|Q8SYC8|Q8SYC8_DROME RE67757p OS=Drosophila melanogaster GN=Ski6 PE=2 SV=1	2	7	7	27.021	246	71.012	39.4	39.4	26	137310000	592770000	152350000
M9PIG8;P55035	tr|M9PIG8|M9PIG8_DROME Regulatory particle non-ATPase 10, isoform B OS=Drosophila melanogaster GN=Rpn10 PE=4 SV=1;sp|P55035|PSMD4_DROME 26S proteasome non-ATPase regulatory subunit 4 OS=Drosophila melanogaster GN=Rpn10 PE=1 SV=2	2	11	11	42.618	396	71.498	25.8	34.6	38.6	134870000	1033200000	1511600000
Q9VWH4	sp|Q9VWH4|IDH3A_DROME Probable isocitrate dehydrogenase [NAD] subunit alpha, mitochondrial OS=Drosophila melanogaster GN=l(1)G0156 PE=2 SV=1	1	14	14	40.844	377	174.02	37.1	39.8	37.1	133930000	311210000	791480000
Q24020	sp|Q24020|FLII_DROME Protein flightless-1 OS=Drosophila melanogaster GN=fliI PE=2 SV=1	1	16	16	143.68	1256	58.875	15.4	3.3	3.7	133870000	7565700	28695000
F3YDH5;Q8IH88;P29843;Q7JQR9	tr|F3YDH5|F3YDH5_DROME AT29089p (Fragment) OS=Drosophila melanogaster GN=Hsc70-1-RA PE=2 SV=1;tr|Q8IH88|Q8IH88_DROME AT28834p (Fragment) OS=Drosophila melanogaster GN=Hsc70-1 PE=2 SV=1;sp|P29843|HSP7A_DROME Heat shock 70 kDa protein cognate 1 OS=Drosophila	4	7	1	73.407	665	2.1673	10.4	8.7	8.7	133710000	0	0
Q9VFV9	tr|Q9VFV9|Q9VFV9_DROME DnaJ-like-2, isoform A OS=Drosophila melanogaster GN=Droj2 PE=1 SV=1	1	10	10	45.23	403	120.71	36	29.5	38.2	133400000	229220000	980080000
Q9W060;C5WLQ5	tr|Q9W060|Q9W060_DROME Mauve OS=Drosophila melanogaster GN=mv PE=4 SV=2;tr|C5WLQ5|C5WLQ5_DROME MIP12294p (Fragment) OS=Drosophila melanogaster GN=CG5691-RA PE=2 SV=1	2	2	2	399.85	3535	3.0521	0.2	0	0.3	132260000	0	28487000
Q9VBN5	tr|Q9VBN5|Q9VBN5_DROME 60S ribosomal protein L27 OS=Drosophila melanogaster GN=RpL27 PE=1 SV=1	1	7	7	15.903	135	66.89	43	51.1	51.1	132160000	1152800000	1814600000
Q9W057	tr|Q9W057|Q9W057_DROME IP09524p OS=Drosophila melanogaster GN=Dmel\CG11815 PE=2 SV=1	1	1	1	32.639	283	2.2122	9.5	9.5	9.5	129270000	427340000	912680000
Q7K0E6;Q9XYM1	tr|Q7K0E6|Q7K0E6_DROME Aspartyl-tRNA synthetase, isoform A OS=Drosophila melanogaster GN=AspRS PE=1 SV=1;tr|Q9XYM1|Q9XYM1_DROME Aspartyl tRNA synthetase OS=Drosophila melanogaster GN=AspRS PE=2 SV=1	2	16	16	59.058	531	147.24	32.8	32	42.4	128480000	355500000	721900000
Q9VWI2	tr|Q9VWI2|Q9VWI2_DROME N(Alpha)-acetyltransferase 15/16, isoform A OS=Drosophila melanogaster GN=Naa15-16 PE=1 SV=1	1	30	30	103.09	890	145.95	29.8	31.2	34.3	127790000	595740000	916880000
Q9V3J4	sp|Q9V3J4|SEC13_DROME Protein SEC13 homolog OS=Drosophila melanogaster GN=Sec13 PE=1 SV=1	1	11	11	39.527	356	42.465	23.9	33.4	33.4	127700000	636280000	861790000
A1Z784;Q7JV23;A8DY67;D0IQ86	tr|A1Z784|A1Z784_DROME Acetyl-CoA carboxylase, isoform A OS=Drosophila melanogaster GN=ACC PE=1 SV=1;tr|Q7JV23|Q7JV23_DROME Acetyl-CoA carboxylase, isoform B OS=Drosophila melanogaster GN=ACC PE=1 SV=1;tr|A8DY67|A8DY67_DROME Acetyl-CoA carboxylase, isoform	4	35	35	278.59	2482	184.15	14.3	11.9	18	126160000	171140000	810420000
Q7KMQ0;M9PC18;Q9VQN8	tr|Q7KMQ0|Q7KMQ0_DROME 26S proteasome regulatory complex subunit p48B OS=Drosophila melanogaster GN=Rpt1 PE=1 SV=1	3	21	21	48.541	433	144.99	37.2	37	52.7	122640000	570950000	1344900000
O46231;E1JJ21;Q9VA56;Q9VA58;C7LAH8;Q6IDG5;A0A0B4KHF2;Q9VA59;A0A0B4K7R6;A0A0B4KHW6;A8JRH3;A0A0B4K6N4;C8VV00;C6TP61;C0PV34	tr|O46231|O46231_DROME FI18705p1 OS=Drosophila melanogaster GN=tmod PE=1 SV=1;tr|E1JJ21|E1JJ21_DROME Tropomodulin, isoform H OS=Drosophila melanogaster GN=tmod PE=1 SV=1;tr|Q9VA56|Q9VA56_DROME GH23271p OS=Drosophila melanogaster GN=tmod PE=1 SV=2;tr|Q9VA58	15	9	9	41.435	367	38.354	32.7	24.3	28.1	122450000	68630000	172880000
P36241	sp|P36241|RL19_DROME 60S ribosomal protein L19 OS=Drosophila melanogaster GN=RpL19 PE=1 SV=2	1	13	13	23.998	203	97.072	21.2	44.8	40.4	119370000	1533600000	1971600000
E2QD65;P39018	tr|E2QD65|E2QD65_DROME Ribosomal protein S19a, isoform C OS=Drosophila melanogaster GN=RpS19a PE=1 SV=1;sp|P39018|RS19A_DROME 40S ribosomal protein S19a OS=Drosophila melanogaster GN=RpS19a PE=1 SV=3	2	12	12	17.291	156	29.125	37.8	50	56.4	118930000	641280000	1166300000
A0A0B4KEX0;A1ZAB5;Q8MQR3;Q95RN1	tr|A0A0B4KEX0|A0A0B4KEX0_DROME Protein clueless OS=Drosophila melanogaster GN=clu PE=1 SV=1;sp|A1ZAB5|CLU_DROME Protein clueless OS=Drosophila melanogaster GN=clu PE=1 SV=1;tr|Q8MQR3|Q8MQR3_DROME GM10569p (Fragment) OS=Drosophila melanogaster GN=clu PE=2 S	4	31	31	144.74	1289	257.47	22.3	25.6	26.6	118520000	737880000	1196500000
Q9W1I7;A0A0B4LHC9	tr|Q9W1I7|Q9W1I7_DROME CG5554, isoform A OS=Drosophila melanogaster GN=CG5554 PE=1 SV=1;tr|A0A0B4LHC9|A0A0B4LHC9_DROME CG5554, isoform B OS=Drosophila melanogaster GN=CG5554 PE=1 SV=1	2	6	6	36.344	323	38.911	14.6	14.6	17	117770000	334170000	502110000
A0A0S0WNN6;Q9TVM2;Q8IH79	tr|A0A0S0WNN6|A0A0S0WNN6_DROME Embargoed, isoform B OS=Drosophila melanogaster GN=emb PE=1 SV=1;sp|Q9TVM2|XPO1_DROME Exportin-1 OS=Drosophila melanogaster GN=emb PE=1 SV=1;tr|Q8IH79|Q8IH79_DROME GH01059p (Fragment) OS=Drosophila melanogaster GN=emb PE=2 SV	3	21	21	122.8	1063	117.5	21.4	22	20.6	114590000	257970000	311800000
O18335;B8A3X3;Q8IGH2	tr|O18335|O18335_DROME Drab11 OS=Drosophila melanogaster GN=Rab11 PE=1 SV=1;tr|B8A3X3|B8A3X3_DROME FI09227p OS=Drosophila melanogaster GN=Rab11-RB PE=2 SV=1;tr|Q8IGH2|Q8IGH2_DROME RH21315p OS=Drosophila melanogaster GN=Rab11 PE=2 SV=1	3	10	10	24.245	214	37.036	47.2	38.3	46.7	112990000	324340000	682750000
Q9VE73	tr|Q9VE73|Q9VE73_DROME GH17724p OS=Drosophila melanogaster GN=Dmel\CG12333 PE=1 SV=1	1	15	15	53.034	487	176.25	35.5	10.1	42.9	110910000	8517200	1364900000
E4NKN3;Q9W1V3	tr|E4NKN3|E4NKN3_DROME GM13963p OS=Drosophila melanogaster GN=Fib-RA PE=2 SV=1;sp|Q9W1V3|FBRL_DROME rRNA 2-O-methyltransferase fibrillarin OS=Drosophila melanogaster GN=Fib PE=2 SV=1	2	13	13	34.636	344	48.653	27.6	48.8	38.7	110900000	1063900000	839930000
Q9V470;F3YDH6	tr|Q9V470|Q9V470_DROME Succinate--CoA ligase [GDP-forming] subunit beta, mitochondrial OS=Drosophila melanogaster GN=Sucb PE=1 SV=1;tr|F3YDH6|F3YDH6_DROME Succinate-CoA ligase subunit beta OS=Drosophila melanogaster GN=Sucb-RA PE=2 SV=1	2	15	15	45.037	416	84.654	34.1	44	35.6	107300000	429720000	643560000
A0A126GUS7;A0A0B4K618;A0A0B4KFN9;A0A0B4KGP6;B3G0S3;B3G0S8;B3G0T0	tr|A0A126GUS7|A0A126GUS7_DROME Fmr1, isoform J OS=Drosophila melanogaster GN=Fmr1 PE=1 SV=1;tr|A0A0B4K618|A0A0B4K618_DROME Fmr1, isoform G OS=Drosophila melanogaster GN=Fmr1 PE=1 SV=1;tr|A0A0B4KFN9|A0A0B4KFN9_DROME Fmr1, isoform I OS=Drosophila melanogaste	7	15	1	75.818	681	185.23	19.1	19.1	27.6	106670000	162080000	598670000
Q9VZI1;M9PE30	tr|Q9VZI1|Q9VZI1_DROME Transgelin OS=Drosophila melanogaster GN=Chd64 PE=1 SV=2;tr|M9PE30|M9PE30_DROME Transgelin OS=Drosophila melanogaster GN=Chd64 PE=1 SV=1	2	11	11	20.644	188	75.869	65.4	66	69.7	106370000	179680000	527220000
A0A0B4LFD2;P29845	tr|A0A0B4LFD2|A0A0B4LFD2_DROME Heat shock protein cognate 5, isoform B OS=Drosophila melanogaster GN=Hsc70-5 PE=3 SV=1;sp|P29845|HSP7E_DROME Heat shock 70 kDa protein cognate 5 OS=Drosophila melanogaster GN=Hsc70-5 PE=1 SV=2	2	17	16	74.065	686	67.698	21.4	23.9	25.4	105780000	271020000	600310000
Q8SXM8;Q9W327;G7H7Z0	tr|Q8SXM8|Q8SXM8_DROME Lysine--tRNA ligase OS=Drosophila melanogaster GN=LysRS PE=1 SV=1;tr|Q9W327|Q9W327_DROME Lysine--tRNA ligase OS=Drosophila melanogaster GN=LysRS PE=1 SV=2;tr|G7H7Z0|G7H7Z0_DROME Lysine--tRNA ligase OS=Drosophila melanogaster GN=Aats-	3	19	19	64.66	574	155.03	25.8	26.7	32.1	105740000	393120000	631670000
Q7JRI6;Q8IGG3;A1ZB79;Q95RC4;A1ZB80;E1JGL5;A0A0B4K7G1;A1ZB83;A0A0B4LGX1;A0A0B4K897;A1ZB78;A1ZB77	tr|Q7JRI6|Q7JRI6_DROME CG5174, isoform H OS=Drosophila melanogaster GN=CG5174 PE=1 SV=1;tr|Q8IGG3|Q8IGG3_DROME RH27395p OS=Drosophila melanogaster GN=CG5174 PE=2 SV=1;tr|A1ZB79|A1ZB79_DROME CG5174, isoform M OS=Drosophila melanogaster GN=CG5174 PE=1 SV=2;t	12	5	5	20.327	188	23.783	38.3	33.5	38.3	105370000	134170000	379690000
Q9Y0Y5	tr|Q9Y0Y5|Q9Y0Y5_DROME Coatomer subunit epsilon OS=Drosophila melanogaster GN=epsilonCOP PE=1 SV=1	1	11	11	34.619	306	57.461	36.6	28.4	43.1	104980000	148400000	612740000
A0A0H4XWW0;M9W6J0;A0A0B4KGU4;Q9VHP0	tr|A0A0H4XWW0|A0A0H4XWW0_DROME FI24601p1 OS=Drosophila melanogaster GN=bel-RB PE=2 SV=1;tr|M9W6J0|M9W6J0_DROME FI21109p1 OS=Drosophila melanogaster GN=bel-RB PE=2 SV=1;tr|A0A0B4KGU4|A0A0B4KGU4_DROME Belle, isoform B OS=Drosophila melanogaster GN=bel PE=4 S	4	12	12	85.08	798	62.717	18	16.4	21.4	104210000	115870000	308880000
Q7KSM5;Q7KJV5;A0ANV7;Q9VG70;A0ANW1;A0ANV9;A0ANV4	tr|Q7KSM5|Q7KSM5_DROME Activator of SUMO 1 OS=Drosophila melanogaster GN=Aos1 PE=1 SV=1;tr|Q7KJV5|Q7KJV5_DROME Ubiquitin-like protein activating enzyme N subunit OS=Drosophila melanogaster GN=Aos1 PE=2 SV=1;tr|A0ANV7|A0ANV7_DROME CG12276 protein OS=Drosoph	7	9	9	37.673	337	30.534	31.2	33.8	30	103210000	502880000	617230000
Q8MS33;A1Z917;C5WLU7	tr|Q8MS33|Q8MS33_DROME RE20036p OS=Drosophila melanogaster GN=CG13151 PE=2 SV=1;tr|A1Z917|A1Z917_DROME Uncharacterized protein OS=Drosophila melanogaster GN=CG13151 PE=4 SV=1;tr|C5WLU7|C5WLU7_DROME FI03247p (Fragment) OS=Drosophila melanogaster GN=CG13151-	3	11	11	67.72	604	60.568	20.9	11.3	19.9	103180000	74006000	538700000
Q9VNB9	tr|Q9VNB9|Q9VNB9_DROME GEO07455p1 OS=Drosophila melanogaster GN=RpL35A PE=1 SV=1	1	10	10	17.655	157	44.016	33.8	46.5	40.1	103170000	1164900000	1450100000
A0A0B4LFB8;Q95U20;E8NH94;A0A0B4LGF5;A1Z9N0;F0JAK2;A0A0B4LF33;F0JAH2	tr|A0A0B4LFB8|A0A0B4LFB8_DROME Optic atrophy 1 ortholog, isoform D OS=Drosophila melanogaster GN=Opa1 PE=1 SV=1;tr|Q95U20|Q95U20_DROME GH13793p OS=Drosophila melanogaster GN=Opa1 PE=1 SV=1;tr|E8NH94|E8NH94_DROME SD22917p OS=Drosophila melanogaster GN=opa1-	8	22	22	106.93	930	52.153	21.8	19.8	22.4	102290000	311720000	721360000
A8Y560;O17445	tr|A8Y560|A8Y560_DROME Ribosomal protein L15 OS=Drosophila melanogaster GN=RpL15 PE=1 SV=2;sp|O17445|RL15_DROME 60S ribosomal protein L15 OS=Drosophila melanogaster GN=RpL15 PE=1 SV=1	2	8	8	24.325	204	52.676	21.1	37.3	37.3	97860000	1658300000	1835800000
Q9VBU9	tr|Q9VBU9|Q9VBU9_DROME 40S ribosomal protein S27 OS=Drosophila melanogaster GN=RpS27 PE=1 SV=1	1	4	4	9.364	84	11.193	22.6	38.1	39.3	96437000	244960000	467640000
P32392	sp|P32392|ARP3_DROME Actin-related protein 3 OS=Drosophila melanogaster GN=Arp3 PE=2 SV=3	1	9	9	47.032	418	47.611	33	30.9	33	95459000	122010000	296590000
E1JIJ5;P31409	tr|E1JIJ5|E1JIJ5_DROME Vacuolar H[+]-ATPase 55kD subunit, isoform C OS=Drosophila melanogaster GN=Vha55 PE=1 SV=1;sp|P31409|VATB_DROME V-type proton ATPase subunit B OS=Drosophila melanogaster GN=Vha55 PE=2 SV=1	2	12	12	54.549	490	64.377	31.6	33.1	31.2	95084000	311530000	381940000
A0A0B4K7G4;P13469;Q8IGX8	tr|A0A0B4K7G4|A0A0B4K7G4_DROME Modulo, isoform C OS=Drosophila melanogaster GN=mod PE=1 SV=1;sp|P13469|MODU_DROME DNA-binding protein modulo OS=Drosophila melanogaster GN=mod PE=1 SV=2;tr|Q8IGX8|Q8IGX8_DROME RE08878p OS=Drosophila melanogaster GN=mod PE=2	3	21	21	60.309	542	127.54	30.4	37.1	19.2	94677000	1174400000	98331000
G7H829;Q9V3Z6;Q8IPH6;Q5U1A3;Q8IPH7;Q7YU72;Q9VLZ3;Q9NH54;Q8IPH8	tr|G7H829|G7H829_DROME Crinkled, isoform C OS=Drosophila melanogaster GN=ck PE=1 SV=1;sp|Q9V3Z6|MYO7A_DROME Myosin-VIIa OS=Drosophila melanogaster GN=ck PE=1 SV=1	9	17	17	250.31	2167	48.554	11	1.6	2.3	94677000	7402700	39730000
Q9VPK3;M9PDQ9	tr|Q9VPK3|Q9VPK3_DROME AT24407p OS=Drosophila melanogaster GN=Dmel\CG31974 PE=2 SV=3;tr|M9PDQ9|M9PDQ9_DROME Uncharacterized protein, isoform D OS=Drosophila melanogaster GN=Dmel\CG31974 PE=4 SV=1	2	8	8	47.445	413	26.736	12.6	19.1	16.7	94121000	194860000	236330000
Q9VXN3	tr|Q9VXN3|Q9VXN3_DROME CG8578, isoform A OS=Drosophila melanogaster GN=Dmel\CG8578 PE=1 SV=2	1	9	9	45.401	396	52.115	30.1	7.3	14.6	93797000	28621000	119170000
Q9VNE9;A0A0B4KFM7	sp|Q9VNE9|RL13A_DROME 60S ribosomal protein L13a OS=Drosophila melanogaster GN=RpL13A PE=1 SV=1	2	8	8	23.647	205	52.781	32.7	32.7	32.7	93617000	1116600000	1812800000
X2JC35;P49630	tr|X2JC35|X2JC35_DROME 60S ribosomal protein L36 OS=Drosophila melanogaster GN=RpL36 PE=2 SV=1;sp|P49630|RL36_DROME 60S ribosomal protein L36 OS=Drosophila melanogaster GN=RpL36 PE=1 SV=1	2	9	9	13.502	115	85.711	27.8	29.6	40.9	93340000	977140000	1719100000
Q95WY3;Q8IGT5;Q961E2;Q95WY4	tr|Q95WY3|Q95WY3_DROME FI04781p OS=Drosophila melanogaster GN=Nop56 PE=1 SV=1;tr|Q8IGT5|Q8IGT5_DROME RE33426p OS=Drosophila melanogaster GN=Nop56 PE=2 SV=1	4	17	17	54.837	496	129.95	31.2	40.9	32.7	92586000	637330000	663590000
M9PB90;Q9VKY2;Q7KMK9;REV__Q7KMK9;REV__Q9VKY2;REV__M9PB90	tr|M9PB90|M9PB90_DROME Cullin-associated and neddylation-dissociated 1, isoform B OS=Drosophila melanogaster GN=Cand1 PE=1 SV=1;sp|Q9VKY2|CAND1_DROME Cullin-associated NEDD8-dissociated protein 1 OS=Drosophila melanogaster GN=Cand1 PE=2 SV=1;tr|Q7KMK9|Q7KM	6	23	23	139.35	1248	81.847	20.3	17.9	22	91672000	221800000	350380000
Q9VNF8;A0A0B4K6T4;A0A0B4K5Z8;Q8IGT0;Q9NFN9;Q95TD2	tr|Q9VNF8|Q9VNF8_DROME Secretory 23, isoform A OS=Drosophila melanogaster GN=Sec23 PE=1 SV=2;tr|A0A0B4K6T4|A0A0B4K6T4_DROME Secretory 23, isoform D OS=Drosophila melanogaster GN=Sec23 PE=1 SV=1;tr|A0A0B4K5Z8|A0A0B4K5Z8_DROME Secretory 23, isoform E OS=Dros	6	17	17	86.801	773	209.83	30.1	32.3	32.7	90860000	324260000	766190000
Q5BI50;Q961E0	tr|Q5BI50|Q5BI50_DROME Cullin 4, isoform A OS=Drosophila melanogaster GN=Cul4 PE=1 SV=1;tr|Q961E0|Q961E0_DROME GM14815p OS=Drosophila melanogaster GN=Cul4 PE=2 SV=1	2	16	16	94.407	821	107.38	17.1	21.3	18.3	90783000	393310000	441920000
B6UWG2;B6UWI3;B6UWI1;B6UWI0;B6UWG6;B6UWG5;B6UWG4;B6UWG1;Q9Y111;Q9W378;M9PH32	tr|B6UWG2|B6UWG2_DROME Meiotic P26 (Fragment) OS=Drosophila melanogaster GN=mei-P26 PE=4 SV=1;tr|B6UWI3|B6UWI3_DROME Meiotic P26 (Fragment) OS=Drosophila melanogaster GN=mei-P26 PE=4 SV=1;tr|B6UWI1|B6UWI1_DROME Meiotic P26 (Fragment) OS=Drosophila melanoga	11	1	1	20.961	177	-2	9.6	0	0	90197000	0	0
X2J5T3;O18334	tr|X2J5T3|X2J5T3_DROME Rab6, isoform B OS=Drosophila melanogaster GN=Rab6 PE=1 SV=1;sp|O18334|RAB6_DROME Ras-related protein Rab6 OS=Drosophila melanogaster GN=Rab6 PE=1 SV=1	2	4	3	23.48	208	31.921	14.4	19.7	14.4	89870000	303590000	489180000
P23128	sp|P23128|DDX6_DROME Putative ATP-dependent RNA helicase me31b OS=Drosophila melanogaster GN=me31B PE=1 SV=3	1	10	10	51.945	459	44.012	20.9	17.6	23.3	89603000	303690000	765610000
Q7JVY0;A0A0B4KEU5;A0A0B4KEJ7	tr|Q7JVY0|Q7JVY0_DROME Coronin OS=Drosophila melanogaster GN=coro PE=1 SV=1;tr|A0A0B4KEU5|A0A0B4KEU5_DROME Coronin OS=Drosophila melanogaster GN=coro PE=1 SV=1;tr|A0A0B4KEJ7|A0A0B4KEJ7_DROME Coronin OS=Drosophila melanogaster GN=coro PE=1 SV=1	3	19	19	57.268	528	119	38.3	44.7	53.4	89428000	616810000	1749600000
M9PDV1;M9NCZ5;D2NUK4;P48608;D1Z399	tr|M9PDV1|M9PDV1_DROME Diaphanous, isoform E OS=Drosophila melanogaster GN=dia PE=1 SV=1;tr|M9NCZ5|M9NCZ5_DROME Diaphanous, isoform D OS=Drosophila melanogaster GN=dia PE=1 SV=1;tr|D2NUK4|D2NUK4_DROME MIP15714p OS=Drosophila melanogaster GN=dia-RA PE=2 SV=	5	15	15	123.17	1091	99.576	16.9	12.2	18.3	89360000	80247000	519630000
Q9U5W4;A0ANZ0;A0ANY9;Q9VM69	tr|Q9U5W4|Q9U5W4_DROME CG10206 protein OS=Drosophila melanogaster GN=nop5 PE=2 SV=1;tr|A0ANZ0|A0ANZ0_DROME CG10206 protein OS=Drosophila melanogaster GN=CG10206 PE=4 SV=1;tr|A0ANY9|A0ANY9_DROME CG10206 protein OS=Drosophila melanogaster GN=CG10206 PE=4 SV=	4	15	15	57.042	510	171.39	27.3	42.5	27.8	87351000	680330000	531900000
A1ZBJ2;C9QPI7	tr|A1ZBJ2|A1ZBJ2_DROME CG7461, isoform B OS=Drosophila melanogaster GN=CG7461 PE=1 SV=2;tr|C9QPI7|C9QPI7_DROME RH10980p (Fragment) OS=Drosophila melanogaster GN=CG7461-RB PE=2 SV=1	2	13	13	68.367	627	47.946	25.4	19.8	26.8	87145000	218410000	247960000
Q9W3N1	tr|Q9W3N1|Q9W3N1_DROME RH59310p OS=Drosophila melanogaster GN=spidey PE=1 SV=1	1	11	11	35.116	321	47.968	42.1	42.1	42.1	86816000	306150000	700770000
M9MRQ9;Q94522;Q9VDW7;A0AMM0	tr|M9MRQ9|M9MRQ9_DROME Succinate--CoA ligase [ADP/GDP-forming] subunit alpha, mitochondrial OS=Drosophila melanogaster GN=Scsalpha PE=3 SV=1;sp|Q94522|SUCA_DROME Succinate--CoA ligase [ADP/GDP-forming] subunit alpha, mitochondrial OS=Drosophila melanogaste	4	8	8	34.389	328	33.019	28	31.7	31.7	85481000	302470000	380770000
Q8T4A9	tr|Q8T4A9|Q8T4A9_DROME AT07738p OS=Drosophila melanogaster GN=Rrp45 PE=1 SV=1	1	7	7	46.303	412	67.238	15.8	15.8	10.4	84945000	378130000	73242000
A0A140SRF8	tr|A0A140SRF8|A0A140SRF8_DROME Uncharacterized protein, isoform C OS=Drosophila melanogaster GN=Dmel\CG11857 PE=1 SV=1	1	6	2	29.576	265	35.856	26.8	38.1	18.9	84779000	169310000	159950000
Q9VNE2	sp|Q9VNE2|PKRA_DROME Protein krasavietz OS=Drosophila melanogaster GN=kra PE=1 SV=1	1	14	14	49.224	422	64.712	28.2	32	29.9	84542000	277920000	396940000
Q7K2G1	sp|Q7K2G1|ADRM1_DROME Proteasomal ubiquitin receptor ADRM1 homolog OS=Drosophila melanogaster GN=Rpn13 PE=1 SV=1	1	10	1	42.012	389	323.31	38.3	48.3	42.9	84490000	195770000	239550000
Q8STG9;F0JAP1	tr|Q8STG9|Q8STG9_DROME DSec61alpha OS=Drosophila melanogaster GN=Sec61alpha PE=1 SV=1;tr|F0JAP1|F0JAP1_DROME LP19279p OS=Drosophila melanogaster GN=Sec61alpha-RA PE=2 SV=1	2	6	6	52.184	476	18.538	12.2	13.9	13.9	83138000	269170000	457620000
A0A0B4KEH0;P29310;Q6LEH5	tr|A0A0B4KEH0|A0A0B4KEH0_DROME 14-3-3zeta, isoform K OS=Drosophila melanogaster GN=14-3-3zeta PE=1 SV=1;sp|P29310|1433Z_DROME 14-3-3 protein zeta OS=Drosophila melanogaster GN=14-3-3zeta PE=1 SV=1;tr|Q6LEH5|Q6LEH5_DROME Epidermal growth factor receptor typ	3	7	6	28.227	248	61.324	33.5	33.5	33.5	82505000	197650000	289500000
Q9VTU4	sp|Q9VTU4|EIF3L_DROME Eukaryotic translation initiation factor 3 subunit L OS=Drosophila melanogaster GN=eIF3l PE=2 SV=1	1	10	10	63.223	539	108.35	22.3	22.3	22.3	82436000	368230000	512690000
M9MRC9;P41092	tr|M9MRC9|M9MRC9_DROME GEO07462p1 OS=Drosophila melanogaster GN=RpL27A PE=2 SV=1;sp|P41092|RL27A_DROME 60S ribosomal protein L27a OS=Drosophila melanogaster GN=RpL27A PE=1 SV=2	2	8	8	17.022	149	25.764	28.2	38.9	38.9	82119000	978440000	1497800000
Q7KU82;M9PEE1;P91638;Q9VS62;Q8SXZ0	tr|Q7KU82|Q7KU82_DROME MIP20544p OS=Drosophila melanogaster GN=smid PE=1 SV=2;tr|M9PEE1|M9PEE1_DROME Smallminded, isoform H OS=Drosophila melanogaster GN=smid PE=1 SV=1;tr|P91638|P91638_DROME Smallminded protein OS=Drosophila melanogaster GN=smid PE=1 SV=1	5	14	14	100.31	910	107.77	21.3	21.1	20.1	80841000	211530000	439060000
D3DMY5;C6TP70;P92177	tr|D3DMY5|D3DMY5_DROME AT09839p (Fragment) OS=Drosophila melanogaster GN=14-3-3epsilon-RD PE=2 SV=1;tr|C6TP70|C6TP70_DROME MIP08648p OS=Drosophila melanogaster GN=14-3-3epsilon-RA PE=2 SV=1;sp|P92177|1433E_DROME 14-3-3 protein epsilon OS=Drosophila melanog	3	9	8	29.535	259	75.098	29	29	35.1	80763000	251390000	488430000
Q9VHE5	tr|Q9VHE5|Q9VHE5_DROME RH48056p OS=Drosophila melanogaster GN=RpL34b PE=1 SV=1	1	10	4	18.431	168	53.425	25.6	48.8	48.8	79435000	1611700000	1992500000
A0A0B4KF46;O46111;Q8T0L3	tr|A0A0B4KF46|A0A0B4KF46_DROME Ubiquitin activating enzyme 1, isoform C OS=Drosophila melanogaster GN=Uba1 PE=1 SV=1;tr|O46111|O46111_DROME Ubiquitin activating enzyme OS=Drosophila melanogaster GN=Uba1 PE=2 SV=1;tr|Q8T0L3|Q8T0L3_DROME GH24511p OS=Drosophi	3	19	19	111.77	1008	65.626	17.6	22	21.3	79265000	178000000	306260000
Q9VQL7;B7Z001;B6IDT3;Q7KML1;Q8MR70;Q9VQL6;M9PB21	tr|Q9VQL7|Q9VQL7_DROME Fatty acid synthase 1, isoform A OS=Drosophila melanogaster GN=FASN1 PE=1 SV=1;tr|B7Z001|B7Z001_DROME Fatty acid synthase 1, isoform C OS=Drosophila melanogaster GN=FASN1 PE=1 SV=2;tr|B6IDT3|B6IDT3_DROME GH17750p OS=Drosophila melano	7	57	57	266.44	2438	323.31	18.4	12.3	34	79129000	154150000	3217600000
M9ZVK8;P40796;Q8T8V5	tr|M9ZVK8|M9ZVK8_DROME FI21003p1 OS=Drosophila melanogaster GN=La-RB PE=2 SV=1;sp|P40796|LA_DROME La protein homolog OS=Drosophila melanogaster GN=La PE=1 SV=2;tr|Q8T8V5|Q8T8V5_DROME AT22034p OS=Drosophila melanogaster GN=La PE=2 SV=1	3	14	14	44.884	390	120.65	36.9	49.7	34.9	78878000	682320000	117610000
X2J9A5;Q9VII9	tr|X2J9A5|X2J9A5_DROME Uncharacterized protein, isoform B OS=Drosophila melanogaster GN=BcDNA:LD14730 PE=1 SV=1;tr|Q9VII9|Q9VII9_DROME LD14730p OS=Drosophila melanogaster GN=BcDNA:LD14730 PE=1 SV=2	2	8	8	35.603	325	40.73	32.9	36.9	34.2	77294000	180140000	274530000
O02195	sp|O02195|EIF3I_DROME Eukaryotic translation initiation factor 3 subunit I OS=Drosophila melanogaster GN=eIF3i PE=1 SV=1	1	10	10	36.159	326	80.515	29.1	34	44.2	76664000	195360000	657960000
Q24253;Q960F2	tr|Q24253|Q24253_DROME AP complex subunit beta OS=Drosophila melanogaster GN=AP-1-2beta PE=1 SV=1;tr|Q960F2|Q960F2_DROME AP complex subunit beta OS=Drosophila melanogaster GN=AP-1-2beta PE=2 SV=1	2	17	17	101.18	921	56.284	18.5	19.2	20.1	76521000	178690000	228730000
A0A0B4LFL3;O96827	tr|A0A0B4LFL3|A0A0B4LFL3_DROME Elongation factor 1 beta, isoform C OS=Drosophila melanogaster GN=eEF1beta PE=3 SV=1;sp|O96827|EF1B_DROME Probable elongation factor 1-beta OS=Drosophila melanogaster GN=eEF1beta PE=1 SV=3	2	9	9	24.247	222	126.58	51.8	38.3	51.8	76195000	108580000	946320000
E2QCY2;M9PCX4;Q95R88;Q9VVT8;Q960G4;C4XVE5	tr|E2QCY2|E2QCY2_DROME CG3961, isoform D OS=Drosophila melanogaster GN=Dmel\CG3961 PE=1 SV=1;tr|M9PCX4|M9PCX4_DROME CG3961, isoform E OS=Drosophila melanogaster GN=Dmel\CG3961 PE=1 SV=1;tr|Q95R88|Q95R88_DROME SD01152p OS=Drosophila melanogaster GN=CG3961 P	6	13	13	73.033	654	60.114	19.6	19.9	24.2	76121000	211510000	479100000
Q9VV75	tr|Q9VV75|Q9VV75_DROME AT02348p OS=Drosophila melanogaster GN=UQCR-C2 PE=1 SV=1	1	17	17	45.415	440	187.3	54.8	51.4	54.8	74655000	137700000	343030000
Q29QQ9	tr|Q29QQ9|Q29QQ9_DROME IP10364p OS=Drosophila melanogaster GN=Rrp42 PE=1 SV=1	1	10	10	32.387	296	124.17	33.8	49.7	22.3	74622000	432190000	81986000
A4V4I8;X2JE15;E1JJA4;M9PHQ0;P27619;A4V4J0;M9PJN9;E1JJA5;F6J732;E8NH48;F6J774	tr|A4V4I8|A4V4I8_DROME Shibire, isoform F OS=Drosophila melanogaster GN=shi PE=1 SV=1;tr|X2JE15|X2JE15_DROME Shibire, isoform P OS=Drosophila melanogaster GN=shi PE=1 SV=1;tr|E1JJA4|E1JJA4_DROME Shibire, isoform L OS=Drosophila melanogaster GN=shi PE=1 SV=	11	19	19	97.808	877	117.56	21.2	25.2	24.5	73831000	162330000	380050000
Q9VYK0;Q9U4I2;M9PGZ8	tr|Q9VYK0|Q9VYK0_DROME Smrter, isoform D OS=Drosophila melanogaster GN=Smr PE=1 SV=3;tr|Q9U4I2|Q9U4I2_DROME SANT domain protein SMRTER OS=Drosophila melanogaster GN=Smr PE=2 SV=1;tr|M9PGZ8|M9PGZ8_DROME Smrter, isoform G OS=Drosophila melanogaster GN=Smr PE	3	26	26	379.09	3601	285.95	7.6	0	11.9	73349000	0	1070700000
O18413;Q9VA54	sp|O18413|PRS8_DROME 26S proteasome regulatory subunit 8 OS=Drosophila melanogaster GN=Rpt6 PE=1 SV=2;tr|Q9VA54|Q9VA54_DROME Regulatory particle triple-A ATPase 6-related OS=Drosophila melanogaster GN=Rpt6R PE=1 SV=1	2	12	11	45.857	405	132.18	31.9	33.8	36	73217000	270620000	864060000
Q7KVX5;Q9W4N8;A9YI35	tr|Q7KVX5|Q7KVX5_DROME VAMP-associated protein 33kDa, isoform A OS=Drosophila melanogaster GN=Vap33 PE=1 SV=1;tr|Q9W4N8|Q9W4N8_DROME LD30122p OS=Drosophila melanogaster GN=Vap33 PE=1 SV=1	3	5	5	26.771	235	61.462	28.1	28.1	28.1	72967000	140860000	263180000
M9NDC3;O18388	tr|M9NDC3|M9NDC3_DROME Female sterile (2) ketel, isoform B OS=Drosophila melanogaster GN=Fs(2)Ket PE=4 SV=1;sp|O18388|IMB_DROME Importin subunit beta OS=Drosophila melanogaster GN=Fs(2)Ket PE=2 SV=2	2	14	14	98.695	884	48.991	19.9	19.1	17.8	72915000	152350000	356840000
Q9VN50	sp|Q9VN50|EI3F1_DROME Eukaryotic translation initiation factor 3 subunit F-1 OS=Drosophila melanogaster GN=eIF3f1 PE=2 SV=1	1	7	7	31.104	280	20.594	25.4	28.6	28.6	72813000	152050000	263860000
Q95TH0;Q9VIX4	tr|Q95TH0|Q95TH0_DROME Acyl-coenzyme A oxidase OS=Drosophila melanogaster GN=CG17544 PE=2 SV=1;tr|Q9VIX4|Q9VIX4_DROME Acyl-coenzyme A oxidase OS=Drosophila melanogaster GN=Dmel\CG17544 PE=1 SV=2	2	19	19	77.307	693	83.205	26.1	31.6	35.2	72717000	315820000	782190000
Q8MRY4;Q9VRL8	tr|Q8MRY4|Q8MRY4_DROME SD13619p OS=Drosophila melanogaster GN=blanks PE=2 SV=1;tr|Q9VRL8|Q9VRL8_DROME Blanks OS=Drosophila melanogaster GN=blanks PE=1 SV=1	2	8	8	34.604	314	29.878	21.3	21.3	24.5	72466000	151890000	1249300000
Q9V436	tr|Q9V436|Q9V436_DROME 26S proteasome regulatory complex subunit p30 OS=Drosophila melanogaster GN=Rpn12 PE=1 SV=1	1	6	6	30.225	264	45.183	27.3	27.3	27.3	71494000	124440000	241130000
Q9VCF8;Q8I0A0	tr|Q9VCF8|Q9VCF8_DROME CG5854 OS=Drosophila melanogaster GN=Dmel\CG5854 PE=1 SV=1;tr|Q8I0A0|Q8I0A0_DROME RH40150p OS=Drosophila melanogaster GN=CG5854 PE=2 SV=1	2	11	11	41.801	371	82.147	45.3	36.1	28.6	70964000	119100000	174110000
Q9VQ94;M9PC99	tr|Q9VQ94|Q9VQ94_DROME LP05220p OS=Drosophila melanogaster GN=Sec24CD PE=1 SV=2;tr|M9PC99|M9PC99_DROME Secretory 24CD, isoform C OS=Drosophila melanogaster GN=Sec24CD PE=1 SV=1	2	16	16	129.27	1193	76.575	11.7	15.9	18.4	70738000	348830000	1201200000
Q9VJ12;Q8MRH4	tr|Q9VJ12|Q9VJ12_DROME Acinus, isoform A OS=Drosophila melanogaster GN=Acn PE=1 SV=1;tr|Q8MRH4|Q8MRH4_DROME LD46360p OS=Drosophila melanogaster GN=Acn PE=2 SV=1	2	14	14	83.719	739	55.784	19.6	3.7	22.3	70409000	5145200	798340000
Q9VZ58	tr|Q9VZ58|Q9VZ58_DROME Purple acid phosphatase OS=Drosophila melanogaster GN=Dmel\CG1637 PE=1 SV=1	1	5	5	51.878	450	11.173	13.1	10.9	13.1	70051000	77753000	165220000
A0A0B4JCW4;A0A126GUR6;Q9VHJ8;Q95U38;D6W4K6	tr|A0A0B4JCW4|A0A0B4JCW4_DROME Succinate--CoA ligase [ADP-forming] subunit beta, mitochondrial OS=Drosophila melanogaster GN=skap PE=1 SV=1;tr|A0A126GUR6|A0A126GUR6_DROME Succinate--CoA ligase [ADP-forming] subunit beta, mitochondrial OS=Drosophila melanog	5	9	9	48.983	451	82.568	17.3	27.9	27.9	69745000	337220000	654250000
X2JFR6;P41374	tr|X2JFR6|X2JFR6_DROME Eukaryotic translation initiation factor 2alpha, isoform B OS=Drosophila melanogaster GN=eIF2alpha PE=4 SV=1;sp|P41374|IF2A_DROME Eukaryotic translation initiation factor 2 subunit 1 OS=Drosophila melanogaster GN=eIF2alpha PE=2 SV=1	2	14	14	38.645	341	127.18	33.4	35.2	40.5	69441000	245230000	671270000
Q9VDK7;Q5BHY9;Q95SX0	tr|Q9VDK7|Q9VDK7_DROME Signal recognition particle subunit SRP72 OS=Drosophila melanogaster GN=Srp72 PE=1 SV=1;tr|Q5BHY9|Q5BHY9_DROME Signal recognition particle subunit SRP72 OS=Drosophila melanogaster GN=Srp72 PE=2 SV=1	3	19	19	72.85	650	136.9	25.8	33.1	35.7	69145000	224230000	582290000
O97125	sp|O97125|HSP68_DROME Heat shock protein 68 OS=Drosophila melanogaster GN=Hsp68 PE=1 SV=1	1	6	2	69.743	635	14.855	15	10.7	12.9	68829000	145000000	336940000
O01666	sp|O01666|ATPG_DROME ATP synthase subunit gamma, mitochondrial OS=Drosophila melanogaster GN=ATPsyngamma PE=2 SV=2	1	13	13	32.871	297	65.528	35.7	43.4	42.8	68540000	165880000	481620000
X2JD11;M9PI87;Q9VVF8;Q29R08;Q8MR74	tr|X2JD11|X2JD11_DROME CG7692, isoform C OS=Drosophila melanogaster GN=Dmel\CG7692 PE=4 SV=1;tr|M9PI87|M9PI87_DROME CG7692, isoform B OS=Drosophila melanogaster GN=Dmel\CG7692 PE=4 SV=1;tr|Q9VVF8|Q9VVF8_DROME CG7692, isoform A OS=Drosophila melanogaster GN	5	21	18	151.79	1323	102.3	15.7	13.7	20.1	68360000	144560000	445160000
X2JFG0;P05990;Q1RKZ5;A6YH32	tr|X2JFG0|X2JFG0_DROME Rudimentary, isoform D OS=Drosophila melanogaster GN=r PE=1 SV=1;sp|P05990|PYR1_DROME CAD protein OS=Drosophila melanogaster GN=r PE=1 SV=3	4	23	23	246.67	2224	87.389	12.8	11	13.2	68278000	166820000	422810000
Q9V434	tr|Q9V434|Q9V434_DROME Asparaginyl-tRNA synthetase, isoform A OS=Drosophila melanogaster GN=AsnRS PE=1 SV=1	1	19	19	63.931	558	144.88	25.3	48.2	44.4	67910000	473620000	1264500000
Q9V3I2	tr|Q9V3I2|Q9V3I2_DROME Drab5 OS=Drosophila melanogaster GN=Rab5 PE=1 SV=1	1	5	5	23.959	219	34.914	28.8	28.8	28.8	67522000	112510000	233950000
P48159;A8E792	sp|P48159|RL23_DROME 60S ribosomal protein L23 OS=Drosophila melanogaster GN=RpL23 PE=1 SV=2;tr|A8E792|A8E792_DROME TA01212p OS=Drosophila melanogaster GN=RpL17A PE=2 SV=1	2	6	6	14.936	140	18.747	31.4	38.6	38.6	67395000	664630000	855190000
P04359;A0A1B3Q3R0;A0A0F6PCQ7;G8E4R5	sp|P04359|RL32_DROME 60S ribosomal protein L32 OS=Drosophila melanogaster GN=RpL32 PE=1 SV=3;tr|A0A1B3Q3R0|A0A1B3Q3R0_DROME GEO09668p1 (Fragment) OS=Drosophila melanogaster PE=2 SV=1;tr|A0A0F6PCQ7|A0A0F6PCQ7_DROME Ribosomal protein L32 (Fragment) OS=Drosop	4	6	6	16.02	134	26.049	22.4	39.6	41	67253000	614850000	691310000
Q9VQE0;Q8IHG0;Q8T9L0	tr|Q9VQE0|Q9VQE0_DROME Dynamin related protein 1, isoform A OS=Drosophila melanogaster GN=Drp1 PE=1 SV=1;tr|Q8IHG0|Q8IHG0_DROME AT04516p OS=Drosophila melanogaster GN=Drp1 PE=2 SV=1	3	13	13	82.565	735	55.47	18.6	17.3	21	64621000	131440000	250070000
M9NDX0;M9PDS8;M9PEA9;M9PGZ0;M9PBI9;M9PEA5;M9PDZ9;M9PDS3;M9PBJ0;M9PGY4;M9PDZ6;M9PEA0;Q9I7U4;I1WYI2	tr|M9NDX0|M9NDX0_DROME Sallimus, isoform D OS=Drosophila melanogaster GN=sls PE=4 SV=1;tr|M9PDS8|M9PDS8_DROME Sallimus, isoform Y OS=Drosophila melanogaster GN=sls PE=4 SV=1;tr|M9PEA9|M9PEA9_DROME Sallimus, isoform Z OS=Drosophila melanogaster GN=sls PE=4	14	18	18	542.45	4811	45.29	5.4	0	0	64371000	0	0
P55162	sp|P55162|HEM_DROME Membrane-associated protein Hem OS=Drosophila melanogaster GN=Hem PE=2 SV=1	1	20	20	129.38	1126	51.578	15	10.8	17.9	63306000	73880000	283520000
Q9VSS2	sp|Q9VSS2|SRP68_DROME Signal recognition particle subunit SRP68 OS=Drosophila melanogaster GN=Srp68 PE=2 SV=1	1	16	16	69.008	604	81.756	28	29.6	33.4	62662000	181640000	573430000
Q9VPY2;Q9GUB1	tr|Q9VPY2|Q9VPY2_DROME Phospholipase A2 activator protein, isoform A OS=Drosophila melanogaster GN=Plap PE=1 SV=1;tr|Q9GUB1|Q9GUB1_DROME Phospholipase A2 activating protein homolog OS=Drosophila melanogaster GN=Plap PE=2 SV=1	2	13	13	85.75	787	73.989	20.1	14.5	20.6	61327000	151250000	243950000
Q9Y134	tr|Q9Y134|Q9Y134_DROME L.2.35Df OS=Drosophila melanogaster GN=Mtr4 PE=1 SV=1	1	17	17	118.92	1055	39.514	15.3	12.3	16.3	60152000	143620000	285610000
Q9VXN4	sp|Q9VXN4|SYRC_DROME Probable arginine--tRNA ligase, cytoplasmic OS=Drosophila melanogaster GN=ArgRS PE=2 SV=1	1	11	11	75.576	665	27.659	17.9	16.4	14.6	59884000	126760000	213250000
P48591	sp|P48591|RIR1_DROME Ribonucleoside-diphosphate reductase large subunit OS=Drosophila melanogaster GN=RnrL PE=1 SV=2	1	14	14	91.977	812	47.946	13.2	17	17.7	59794000	185950000	402100000
A0A126GUT1;S5PU30;Q9VGS2	tr|A0A126GUT1|A0A126GUT1_DROME Translationally controlled tumor protein, isoform B OS=Drosophila melanogaster GN=Tctp PE=3 SV=1;tr|S5PU30|S5PU30_DROME IP21842p1 (Fragment) OS=Drosophila melanogaster GN=Tctp-RA PE=2 SV=1;sp|Q9VGS2|TCTP_DROME Translationally	3	10	10	19.637	172	74.258	36	51.2	64.5	59613000	256190000	1282700000
Q9W2D9	sp|Q9W2D9|EIF3K_DROME Eukaryotic translation initiation factor 3 subunit K OS=Drosophila melanogaster GN=eIF3k PE=2 SV=1	1	7	7	25.665	222	61.458	36.5	31.5	31.5	59221000	106980000	250940000
Q8IN95	tr|Q8IN95|Q8IN95_DROME RE67940p OS=Drosophila melanogaster GN=NudC-L PE=2 SV=2	1	13	13	35.004	306	82.123	26.8	33.3	45.1	58909000	186840000	2153300000
X2J4W8;Q9V447	tr|X2J4W8|X2J4W8_DROME Kruppel homolog 2, isoform C OS=Drosophila melanogaster GN=Kr-h2 PE=1 SV=1;sp|Q9V447|KRH2_DROME Krueppel homolog 2 OS=Drosophila melanogaster GN=Kr-h2 PE=1 SV=1	2	6	6	31.215	276	20.512	17.4	21	21	58428000	176910000	200920000
P02283	sp|P02283|H2B_DROME Histone H2B OS=Drosophila melanogaster GN=His2B PE=1 SV=2	1	9	9	13.696	123	54.577	39	60.2	54.5	58361000	2113900000	655040000
Q9VXR5;Q8T9H2;A8E715	tr|Q9VXR5|Q9VXR5_DROME CG9281, isoform B OS=Drosophila melanogaster GN=BEST:LD38280 PE=1 SV=1	3	15	15	69.501	611	50.564	19	22.3	26.7	58084000	137220000	493720000
A0A0B4LGH1	tr|A0A0B4LGH1|A0A0B4LGH1_DROME Tubulin beta chain OS=Drosophila melanogaster GN=betaTub60D PE=1 SV=1	1	23	1	50.778	453	7.5043	58.5	65.6	65.6	57289000	175310000	351740000
Q9Y162	tr|Q9Y162|Q9Y162_DROME BcDNA.GH02678 OS=Drosophila melanogaster GN=Vps4 PE=1 SV=1	1	10	10	49.595	442	26.625	13.1	17.4	21.5	57240000	117680000	314680000
A0A0B4KFZ9;P84040	tr|A0A0B4KFZ9|A0A0B4KFZ9_DROME Histone H4 OS=Drosophila melanogaster GN=His4r PE=3 SV=1;sp|P84040|H4_DROME Histone H4 OS=Drosophila melanogaster GN=His4 PE=1 SV=2	2	6	6	11.381	103	24.486	29.1	51.5	41.7	57167000	1303100000	405050000
Q8SXY6	sp|Q8SXY6|TMEDA_DROME Transmembrane emp24 domain-containing protein bai OS=Drosophila melanogaster GN=bai PE=2 SV=1	1	4	4	23.691	206	12.349	15	15	9.7	57077000	130600000	110650000
P52295	sp|P52295|IMA_DROME Importin subunit alpha OS=Drosophila melanogaster GN=Pen PE=1 SV=2	1	10	10	57.821	522	87.169	20.7	23.9	24.3	57035000	90758000	404050000
A8DYJ2;A0A0B4K849;A0A0B4K7A5;Q02645;Q6NLI3;B8A408;C3KGQ7	tr|A8DYJ2|A8DYJ2_DROME Hu li tai shao, isoform P OS=Drosophila melanogaster GN=hts PE=1 SV=2;tr|A0A0B4K849|A0A0B4K849_DROME Hu li tai shao, isoform O OS=Drosophila melanogaster GN=hts PE=1 SV=1;tr|A0A0B4K7A5|A0A0B4K7A5_DROME Hu li tai shao, isoform Q OS=Dr	7	11	11	205.2	1833	51.99	7.6	2.7	8.1	55918000	30645000	154150000
Q9VH07	sp|Q9VH07|RUVB1_DROME RuvB-like helicase 1 OS=Drosophila melanogaster GN=pont PE=1 SV=1	1	8	8	50.242	456	32.224	24.3	24.3	24.3	55802000	222960000	234130000
Q0PQ31;Q0PQ30;P46863	tr|Q0PQ31|Q0PQ31_DROME Microtubule dependent motor protein OS=Drosophila melanogaster GN=Klp61F PE=3 SV=1;tr|Q0PQ30|Q0PQ30_DROME Microtubule dependent motor protein OS=Drosophila melanogaster GN=Klp61F PE=3 SV=1;sp|P46863|KL61_DROME Kinesin-like protein Kl	3	9	9	121.06	1066	35.842	12.6	7.4	9.6	55357000	61007000	140010000
Q76NQ0;R9S0M5;Q8IH64;Q6NP35	tr|Q76NQ0|Q76NQ0_DROME Dolichyl-diphosphooligosaccharide--protein glycosyltransferase subunit 1 OS=Drosophila melanogaster GN=Dmel\CG33303 PE=1 SV=1;tr|R9S0M5|R9S0M5_DROME Dolichyl-diphosphooligosaccharide--protein glycosyltransferase subunit 1 (Fragment)	4	13	13	51.709	458	47.784	24	34.7	37.1	55337000	318570000	646870000
Q7KN75;Q9U982;Q7KN84;Q95T04	tr|Q7KN75|Q7KN75_DROME Dodeca-satellite-binding protein 1, isoform A OS=Drosophila melanogaster GN=Dp1 PE=1 SV=1;tr|Q9U982|Q9U982_DROME Drosophila dodeca-satellite protein 1 OS=Drosophila melanogaster GN=Dp1 PE=2 SV=1;tr|Q7KN84|Q7KN84_DROME Uncharacterized	4	21	21	144.27	1301	137.38	15.3	15.9	23.8	55266000	114500000	812520000
Q9VZQ8;Q8IRD4;Q8IRD3;Q86NS7	tr|Q9VZQ8|Q9VZQ8_DROME Glutathione peroxidase OS=Drosophila melanogaster GN=PHGPx PE=1 SV=1;tr|Q8IRD4|Q8IRD4_DROME Glutathione peroxidase OS=Drosophila melanogaster GN=PHGPx PE=1 SV=1;tr|Q8IRD3|Q8IRD3_DROME Glutathione peroxidase OS=Drosophila melanogaster	4	6	6	18.676	169	21.832	36.1	36.1	36.1	55112000	155390000	239670000
Q9XZ61	tr|Q9XZ61|Q9XZ61_DROME Ubiquitin carboxyl-terminal hydrolase OS=Drosophila melanogaster GN=Uch-L5 PE=1 SV=1	1	11	11	37.672	324	32.821	34	36.7	36.4	54798000	478080000	671350000
E8NHA7;A0A0B4KEI5;Q9V9K7	tr|E8NHA7|E8NHA7_DROME GH05193p OS=Drosophila melanogaster GN=Ars2-RC PE=2 SV=1;tr|A0A0B4KEI5|A0A0B4KEI5_DROME Ars2, isoform E OS=Drosophila melanogaster GN=Ars2 PE=1 SV=1;sp|Q9V9K7|SRRT_DROME Serrate RNA effector molecule homolog OS=Drosophila melanogaste	3	12	12	80.22	709	42.581	10.7	14.2	17.6	54346000	149020000	402780000
D3DMG7;A1Z814;C0PTW5;E1JH23;A0A0B4KEI3	tr|D3DMG7|D3DMG7_DROME Oxysterol-binding protein OS=Drosophila melanogaster GN=CG1513-RA PE=2 SV=1;tr|A1Z814|A1Z814_DROME Oxysterol-binding protein OS=Drosophila melanogaster GN=CG1513-RA PE=1 SV=2;tr|C0PTW5|C0PTW5_DROME Oxysterol-binding protein OS=Drosop	5	3	3	87.383	784	4.7552	4.2	4.2	4.2	54337000	354180000	242560000
O76742	tr|O76742|O76742_DROME CG5915 protein OS=Drosophila melanogaster GN=Rab7 PE=1 SV=1	1	6	6	23.331	207	20.221	38.2	38.2	38.2	54054000	138810000	298180000
Q8T060;Q6NKM4;E4NKL6;Q9VUR3	tr|Q8T060|Q8T060_DROME AaRS-interacting multifunctional protein 2, isoform B OS=Drosophila melanogaster GN=AIMP2 PE=1 SV=3;tr|Q6NKM4|Q6NKM4_DROME LP12114p (Fragment) OS=Drosophila melanogaster PE=2 SV=1;tr|E4NKL6|E4NKL6_DROME RE70278p (Fragment) OS=Drosoph	4	6	6	33.241	301	27.828	24.6	17.3	27.2	53951000	149040000	302690000
M9PEL1;Q07327	tr|M9PEL1|M9PEL1_DROME Ras opposite, isoform B OS=Drosophila melanogaster GN=Rop PE=3 SV=1;sp|Q07327|ROP_DROME Protein ROP OS=Drosophila melanogaster GN=Rop PE=2 SV=2	2	11	11	67.85	597	50.479	15.4	20.9	25.6	53720000	262740000	688280000
Q94882;O97417;A1Z6Z9;U3R9T8;A1Z6Z8;Q7YU40;A1Z700	tr|Q94882|Q94882_DROME Dilute class unconventional myosin (Fragment) OS=Drosophila melanogaster GN=didum PE=2 SV=4;tr|O97417|O97417_DROME Myosin V OS=Drosophila melanogaster GN=didum PE=2 SV=1;tr|A1Z6Z9|A1Z6Z9_DROME Dilute class unconventional myosin, isof	7	13	13	202.1	1745	26.187	8.8	0.6	0	53358000	1874200	0
M9PF16;Q00963;M9PHG4;X4YME1	tr|M9PF16|M9PF16_DROME Spectrin beta chain OS=Drosophila melanogaster GN=beta-Spec PE=3 SV=1;sp|Q00963|SPTCB_DROME Spectrin beta chain OS=Drosophila melanogaster GN=beta-Spec PE=1 SV=2;tr|M9PHG4|M9PHG4_DROME Spectrin beta chain OS=Drosophila melanogaster G	4	26	26	267.62	2308	185.64	8.6	7.8	11.5	52626000	277520000	278250000
Q27268;M9PC90;H1UUC9	sp|Q27268|DX39B_DROME ATP-dependent RNA helicase WM6 OS=Drosophila melanogaster GN=Hel25E PE=1 SV=1;tr|M9PC90|M9PC90_DROME Helicase at 25E, isoform D OS=Drosophila melanogaster GN=Hel25E PE=1 SV=1	3	9	9	48.651	424	34.861	19.6	16.7	24.5	52220000	144210000	215810000
Q9VKJ4	tr|Q9VKJ4|Q9VKJ4_DROME Csl4 OS=Drosophila melanogaster GN=Csl4 PE=2 SV=1	1	4	4	22.711	204	29.362	23	23	10.3	52206000	217790000	53166000
Q9VNC2;Q7KTS4	tr|Q9VNC2|Q9VNC2_DROME Histone deacetylase OS=Drosophila melanogaster GN=HDAC3 PE=1 SV=2;tr|Q7KTS4|Q7KTS4_DROME Histone deacetylase OS=Drosophila melanogaster GN=HDAC3 PE=1 SV=1	2	7	7	49.643	438	33.32	13	0	23.5	52010000	0	265070000
Q9VXL4	tr|Q9VXL4|Q9VXL4_DROME LD38104p OS=Drosophila melanogaster GN=Rrp47 PE=1 SV=1	1	3	3	18.138	159	20.34	20.1	20.1	20.1	51420000	101030000	359620000
E2QCP0;P84249;Q6TXQ1	tr|E2QCP0|E2QCP0_DROME Histone H3 OS=Drosophila melanogaster GN=His3.3A PE=1 SV=2;sp|P84249|H33_DROME Histone H3.3 OS=Drosophila melanogaster GN=His3.3A PE=1 SV=2;tr|Q6TXQ1|Q6TXQ1_DROME H3L-like histone (Fragment) OS=Drosophila melanogaster GN=His3.3A PE=3	3	5	1	15.328	136	18.762	40.4	43.4	40.4	51037000	922770000	295190000
Q9W0S7;Q8T0F1	tr|Q9W0S7|Q9W0S7_DROME LD20211p OS=Drosophila melanogaster GN=Tudor-SN PE=1 SV=1;tr|Q8T0F1|Q8T0F1_DROME LD06532p OS=Drosophila melanogaster GN=Tudor-SN PE=2 SV=1	2	11	11	103.1	926	42.645	17.6	19.3	8.9	50767000	125300000	59667000
Q9V7D2;X2JE14;Q9NEF6	sp|Q9V7D2|VATD1_DROME V-type proton ATPase subunit D 1 OS=Drosophila melanogaster GN=Vha36-1 PE=2 SV=1	3	7	7	27.627	246	64.457	36.6	36.6	36.2	50431000	179120000	216780000
Q9V3Y5;F6J3J2;A9YIQ1;A9YIQ0;A9YIP7;A9YIP6;A9YIP1;A9YIP0;F6JAQ2;F6JAP6;F6JAN6	tr|Q9V3Y5|Q9V3Y5_DROME BcDNA.LD23634 OS=Drosophila melanogaster GN=BcDNA:LD23634 PE=1 SV=1	11	23	23	112.7	998	232.06	15.9	22.7	31.1	50419000	253820000	985350000
Q9VIE8	tr|Q9VIE8|Q9VIE8_DROME Aconitate hydratase, mitochondrial OS=Drosophila melanogaster GN=Acon PE=1 SV=2	1	25	23	85.397	787	173.12	17.9	29.1	37.5	50231000	253950000	1440800000
O62530	tr|O62530|O62530_DROME Adaptor protein complex 2, mu subunit, isoform A OS=Drosophila melanogaster GN=AP-2mu PE=1 SV=1	1	14	14	49.855	437	39.852	16	26.1	26.8	49860000	339060000	319690000
Q7JR58	tr|Q7JR58|Q7JR58_DROME CG6543, isoform A OS=Drosophila melanogaster GN=CG6543 PE=1 SV=1	1	7	7	31.582	295	53.343	21.4	31.2	25.8	49399000	228700000	301770000
Q9VWC7;Q4QQC1	tr|Q9VWC7|Q9VWC7_DROME FI02109p OS=Drosophila melanogaster GN=lincRNA.1023 PE=1 SV=1;tr|Q4QQC1|Q4QQC1_DROME RE07060p OS=Drosophila melanogaster PE=2 SV=1	2	13	13	97.172	870	54.776	16.6	16.8	20	48675000	108470000	262030000
Q9VAB8	tr|Q9VAB8|Q9VAB8_DROME LD15405p OS=Drosophila melanogaster GN=ZIPIC PE=1 SV=1	1	7	7	53.091	457	27.901	14	14.2	20.6	48636000	54502000	318980000
A0A0B4K6U6;Q08473	tr|A0A0B4K6U6|A0A0B4K6U6_DROME Squid, isoform E OS=Drosophila melanogaster GN=sqd PE=4 SV=1;sp|Q08473|SQD_DROME RNA-binding protein squid OS=Drosophila melanogaster GN=sqd PE=1 SV=3	2	8	8	33.054	308	90.965	22.4	31.8	37.7	48346000	421450000	768260000
Q9U1I5;Q7K8Y3;Q7K8Y5;Q8MPN5;Q8MPN6;Q8MM39;Q8MPN7;Q8MPN8;Q8MM49;Q8T0M5	tr|Q9U1I5|Q9U1I5_DROME Serine protease inhibitor (Serpin-4) OS=Drosophila melanogaster GN=Spn42Da PE=2 SV=1;tr|Q7K8Y3|Q7K8Y3_DROME IP16419p OS=Drosophila melanogaster GN=Spn42Da PE=1 SV=1;tr|Q7K8Y5|Q7K8Y5_DROME Serpin 4 OS=Drosophila melanogaster GN=Spn42D	10	8	8	44.133	392	95.61	18.4	18.4	20.2	48086000	192410000	172540000
L0MNA8;P40945	tr|L0MNA8|L0MNA8_DROME ADP ribosylation factor at 102F, isoform B OS=Drosophila melanogaster GN=Arf102F PE=3 SV=1;sp|P40945|ARF2_DROME ADP-ribosylation factor 2 OS=Drosophila melanogaster GN=Arf102F PE=2 SV=2	2	5	3	20.617	180	19.926	37.8	37.8	37.8	47986000	111800000	185180000
M9PJN8;P07487;P07486	tr|M9PJN8|M9PJN8_DROME Glyceraldehyde-3-phosphate dehydrogenase OS=Drosophila melanogaster GN=Gapdh2 PE=3 SV=1;sp|P07487|G3P2_DROME Glyceraldehyde-3-phosphate dehydrogenase 2 OS=Drosophila melanogaster GN=Gapdh2 PE=1 SV=2;sp|P07486|G3P1_DROME Glyceraldehyd	3	3	3	35.369	332	17.779	16.6	16.6	8.4	46918000	171130000	227520000
A8DY82;E2QCN4;A8DY80;A8DY81;A0A0B4LEZ3;C0PUX1;Q8IH39	tr|A8DY82|A8DY82_DROME Not1, isoform E OS=Drosophila melanogaster GN=Not1 PE=1 SV=1;tr|E2QCN4|E2QCN4_DROME Not1, isoform F OS=Drosophila melanogaster GN=Not1 PE=1 SV=1;tr|A8DY80|A8DY80_DROME Not1, isoform D OS=Drosophila melanogaster GN=Not1 PE=1 SV=1;tr|A	7	17	14	249.76	2220	66.68	9.6	4	8.2	46782000	35143000	153430000
Q9VZI2	tr|Q9VZI2|Q9VZI2_DROME Activated Cdc42 kinase OS=Drosophila melanogaster GN=Ack PE=2 SV=2	1	8	8	118.42	1073	56.252	9.3	5.3	8.4	46746000	49754000	163700000
O16158	tr|O16158|O16158_DROME Calcium-binding protein OS=Drosophila melanogaster GN=Scp2 PE=1 SV=1	1	1	1	21.28	184	-2	3.8	3.8	3.8	46279000	310950000	184220000
B7Z0X1;Q9W457;F6J3U3;A9YJ11;A9YJ07;A9YJ06	tr|B7Z0X1|B7Z0X1_DROME Serine hydroxymethyltransferase OS=Drosophila melanogaster GN=Shmt PE=1 SV=1;tr|Q9W457|Q9W457_DROME Serine hydroxymethyltransferase OS=Drosophila melanogaster GN=Shmt PE=1 SV=1	6	15	15	50.984	467	69.255	22.1	32.5	36	46172000	288810000	723020000
F3YDB2;P41375	tr|F3YDB2|F3YDB2_DROME LD35750p OS=Drosophila melanogaster GN=eIF-2beta-RA PE=2 SV=1;sp|P41375|IF2B_DROME Eukaryotic translation initiation factor 2 subunit 2 OS=Drosophila melanogaster GN=eIF-2beta PE=1 SV=1	2	9	9	35.217	312	30.118	19.9	22.8	30.8	45978000	233830000	261730000
Q9VQT6	tr|Q9VQT6|Q9VQT6_DROME CG3513 OS=Drosophila melanogaster GN=Dmel\CG3513 PE=2 SV=1	1	1	1	9.4909	88	-2	21.6	0	21.6	45652000	0	137920000
Q9VAH7	tr|Q9VAH7|Q9VAH7_DROME RE62393p OS=Drosophila melanogaster GN=yata PE=1 SV=1	1	12	12	97.159	873	89.79	18.3	17.3	18.6	45299000	121880000	284970000
Q7K7G0;Q9W555;Q9U8A9;F0JAK8	tr|Q7K7G0|Q7K7G0_DROME Coatomer subunit delta OS=Drosophila melanogaster GN=deltaCOP PE=1 SV=1;tr|Q9W555|Q9W555_DROME Coatomer subunit delta OS=Drosophila melanogaster GN=deltaCOP PE=1 SV=1;tr|Q9U8A9|Q9U8A9_DROME Coatomer subunit delta (Fragment) OS=Drosop	4	7	7	57.817	531	36.283	18.6	15.4	15.6	44976000	127530000	183480000
Q9W388;Q86B59;Q7KVR7;Q494L9;Q7KVR8	tr|Q9W388|Q9W388_DROME Adaptor protein complex 1, gamma subunit, isoform A OS=Drosophila melanogaster GN=AP-1gamma PE=1 SV=2;tr|Q86B59|Q86B59_DROME Adaptor protein complex 1, gamma subunit, isoform C OS=Drosophila melanogaster GN=AP-1gamma PE=1 SV=2;tr|Q7K	5	14	14	104.48	963	73.911	10.8	13.2	15.1	43952000	116600000	235560000
H1UUD2;Q7KMQ5;Q7KRU8;B9EQV2;B8A405;A0A0B4KI27;Q8I0T0	tr|H1UUD2|H1UUD2_DROME Ferritin OS=Drosophila melanogaster GN=Fer1HCH PE=1 SV=1;tr|Q7KMQ5|Q7KMQ5_DROME Ferritin (Fragment) OS=Drosophila melanogaster GN=Fer1HCH PE=3 SV=1;tr|Q7KRU8|Q7KRU8_DROME Ferritin OS=Drosophila melanogaster GN=Fer1HCH PE=1 SV=1;tr|B9	7	3	3	19.242	169	23.489	21.9	30.2	18.9	43874000	174920000	186150000
Q24310	tr|Q24310|Q24310_DROME Polyprotein OS=Drosophila melanogaster GN=polyprotein PE=4 SV=1	1	9	9	119.98	1053	79.719	5.7	7.8	9.2	43872000	263590000	420780000
Q7KUA4;Q7KJV6;Q9VSD9	tr|Q7KUA4|Q7KUA4_DROME LD22577p OS=Drosophila melanogaster GN=Uba2 PE=1 SV=1;tr|Q7KJV6|Q7KJV6_DROME Ubiquitin-like protein activating enzyme OS=Drosophila melanogaster GN=Uba2 PE=2 SV=1;tr|Q9VSD9|Q9VSD9_DROME Smt3 activating enzyme 2 OS=Drosophila melanoga	3	12	12	77.61	700	72.773	17.7	21	23.7	43732000	134040000	391700000
C6SV30;A4V364;A8JR54;Q8IN47;A0A0B4KGK8;Q8IN48;A0A0B4KH21;A0A0B4KH24;A0A0B4KGF9;Q9VDI8;Q7KSA0;A0A0B4KHH8;A0A0B4KHI4;Q86NT3;Q95TW4;A0A0B4KGK5;A0A0B4KHT5;E8NH05	tr|C6SV30|C6SV30_DROME AT04629p (Fragment) OS=Drosophila melanogaster GN=CG17838-RE PE=2 SV=1;tr|A4V364|A4V364_DROME Syncrip, isoform F OS=Drosophila melanogaster GN=Syp PE=1 SV=1;tr|A8JR54|A8JR54_DROME Syncrip, isoform H OS=Drosophila melanogaster GN=Syp	18	10	10	54.792	489	52.587	20.4	24.5	26.6	43024000	156320000	360100000
M9NCX1;P08111;M9PBJ2	tr|M9NCX1|M9NCX1_DROME Lethal (2) giant larvae, isoform G OS=Drosophila melanogaster GN=l(2)gl PE=4 SV=1;sp|P08111|L2GL_DROME Lethal(2) giant larvae protein OS=Drosophila melanogaster GN=l(2)gl PE=1 SV=2;tr|M9PBJ2|M9PBJ2_DROME Lethal (2) giant larvae, isof	3	10	10	126.89	1161	41.285	12.2	3.8	12.3	42955000	15025000	182780000
B5RJ22;O97422	tr|B5RJ22|B5RJ22_DROME Galactosylgalactosylxylosylprotein 3-beta-glucuronosyltransferase OS=Drosophila melanogaster PE=2 SV=1;sp|O97422|B3GI_DROME Galactosylgalactosylxylosylprotein 3-beta-glucuronosyltransferase I OS=Drosophila melanogaster GN=GlcAT-I PE=	2	2	2	35.071	306	4.0859	2.9	5.9	2.9	42688000	143890000	8621700
M9PFW8;Q9VV82;Q8SWQ9;Q9I7R5;M9PFR8;B5RIL6;M9WT69;Q8T094	tr|M9PFW8|M9PFW8_DROME Uncharacterized protein, isoform B OS=Drosophila melanogaster GN=anon-73Bb PE=4 SV=1;tr|Q9VV82|Q9VV82_DROME Uncharacterized protein, isoform A OS=Drosophila melanogaster GN=Dmel\CG32164 PE=4 SV=2;tr|Q8SWQ9|Q8SWQ9_DROME RE37107p OS=Dr	8	8	8	118.86	1059	29.14	10.9	5.4	8.2	42652000	23231000	129990000
C7LA94;O02649;Q9VMN5	tr|C7LA94|C7LA94_DROME FI05241p OS=Drosophila melanogaster PE=2 SV=1;sp|O02649|CH60_DROME 60 kDa heat shock protein, mitochondrial OS=Drosophila melanogaster GN=Hsp60 PE=1 SV=3	3	10	10	60.808	573	92.797	22.2	22.2	25.5	42620000	79135000	170600000
E6PBW0;H9ZJM5;P13607;B5RIT8;I7J4E4;E1JIR4;A0A0B4KGG8;C8VUY7	tr|E6PBW0|E6PBW0_DROME Sodium/potassium-transporting ATPase subunit alpha OS=Drosophila melanogaster GN=Atpalpha-RA PE=2 SV=1;tr|H9ZJM5|H9ZJM5_DROME Sodium/potassium-transporting ATPase subunit alpha OS=Drosophila melanogaster GN=Atpalpha-RA PE=2 SV=1;sp|P	8	11	11	104.7	951	40.022	13	10.2	10.1	42204000	40647000	82662000
Q8T9K7;Q7KTI0	tr|Q8T9K7|Q8T9K7_DROME 1-acyl-sn-glycerol-3-phosphate acyltransferase OS=Drosophila melanogaster GN=fu12 PE=2 SV=1;tr|Q7KTI0|Q7KTI0_DROME 1-acyl-sn-glycerol-3-phosphate acyltransferase OS=Drosophila melanogaster GN=fu12 PE=2 SV=1	2	6	6	30.733	271	11.541	18.1	18.1	21	41750000	134210000	321700000
I0B1N8;Q7KW39;A9UN30	tr|I0B1N8|I0B1N8_DROME FI19805p1 (Fragment) OS=Drosophila melanogaster GN=CG17896-RB PE=2 SV=1;sp|Q7KW39|MMSA_DROME Probable methylmalonate-semialdehyde dehydrogenase [acylating], mitochondrial OS=Drosophila melanogaster GN=CG17896 PE=2 SV=1;tr|A9UN30|A9UN	3	10	10	57.665	535	123.87	15.1	26.4	21.9	41567000	305740000	331170000
Q9W4K0	tr|Q9W4K0|Q9W4K0_DROME CHOp24, isoform A OS=Drosophila melanogaster GN=CHOp24 PE=1 SV=1	1	4	4	23.263	208	10.221	20.7	20.7	20.7	41542000	124980000	116610000
P22465;D5AEP6	sp|P22465|ANX10_DROME Annexin B10 OS=Drosophila melanogaster GN=AnxB10 PE=2 SV=3	2	6	6	35.705	321	48.426	24.3	16.2	5	41433000	36838000	5006400
Q9VBU7;A0A0B4K7J2;D3DMF2;Q8SWV7	tr|Q9VBU7|Q9VBU7_DROME Nucleoporin 358kD, isoform A OS=Drosophila melanogaster GN=Nup358 PE=1 SV=2;tr|A0A0B4K7J2|A0A0B4K7J2_DROME Nucleoporin 358kD, isoform B OS=Drosophila melanogaster GN=Nup358 PE=1 SV=1;tr|D3DMF2|D3DMF2_DROME LD24888p (Fragment) OS=Dros	4	26	26	296.38	2695	108.02	7.4	6	13.7	41433000	49581000	462140000
A0A126GUM8;A0A0B4K6T1;A0A0B4K7U5;E1JH02;A0A0B4KFC5;Q86S05;D0Z768	tr|A0A126GUM8|A0A126GUM8_DROME Lingerer, isoform L OS=Drosophila melanogaster GN=lig PE=1 SV=1;tr|A0A0B4K6T1|A0A0B4K6T1_DROME Lingerer, isoform I OS=Drosophila melanogaster GN=lig PE=1 SV=1;tr|A0A0B4K7U5|A0A0B4K7U5_DROME Lingerer, isoform H OS=Drosophila m	7	14	14	127.51	1261	241.56	9.1	5.9	18.6	41213000	84312000	705070000
A0A0B4JD82;A1ZA72;A0A0B4KF84;A0A0B4KG35;Q9NBB6;Q9NBA9;Q9NBB0;Q9NBC0;Q9NBB2;Q058V0;A1ZA73	tr|A0A0B4JD82|A0A0B4JD82_DROME Stretchin-Mlck, isoform T OS=Drosophila melanogaster GN=Strn-Mlck PE=1 SV=1;tr|A1ZA72|A1ZA72_DROME Stretchin-Mlck, isoform V OS=Drosophila melanogaster GN=Strn-Mlck PE=1 SV=2;tr|A0A0B4KF84|A0A0B4KF84_DROME Stretchin-Mlck, iso	11	3	3	886.48	7905	3.4079	0.2	0.2	0.4	41074000	38073000	100300000
A4V2B8;P08181	tr|A4V2B8|A4V2B8_DROME Casein kinase IIalpha, isoform C OS=Drosophila melanogaster GN=CkIIalpha PE=1 SV=1;sp|P08181|CSK2A_DROME Casein kinase II subunit alpha OS=Drosophila melanogaster GN=CkIIalpha PE=1 SV=2	2	10	10	39.959	336	218.88	35.7	29.8	37.8	40975000	94604000	761500000
O62531;Q8IH10	tr|O62531|O62531_DROME Adaptor protein complex 1, mu subunit OS=Drosophila melanogaster GN=AP-1mu PE=1 SV=1;tr|Q8IH10|Q8IH10_DROME LD27989p OS=Drosophila melanogaster GN=AP-47 PE=2 SV=1	2	11	11	48.94	426	64.426	27.5	28.9	34	40608000	231340000	382790000
Q9V7Y2	sp|Q9V7Y2|SGPL_DROME Sphingosine-1-phosphate lyase OS=Drosophila melanogaster GN=Sply PE=1 SV=1	1	16	16	60.305	545	71.916	26.6	26.2	35.2	39992000	171210000	532600000
A0A0B4LGV1;Q9VHY6;Q95TQ6;F0JAM8	tr|A0A0B4LGV1|A0A0B4LGV1_DROME ER membrane protein complex 1, isoform C OS=Drosophila melanogaster GN=EMC1 PE=1 SV=1;tr|Q9VHY6|Q9VHY6_DROME ER membrane protein complex 1, isoform A OS=Drosophila melanogaster GN=EMC1 PE=1 SV=1	4	5	5	100.03	908	10.609	5.6	6.6	5	39603000	43810000	35538000
Q9VUZ0	tr|Q9VUZ0|Q9VUZ0_DROME Translocon-associated protein subunit beta OS=Drosophila melanogaster GN=SsRbeta PE=1 SV=2	1	2	2	21.206	190	32.963	19.5	19.5	19.5	39584000	166000000	282290000
A0A0B4LI25;P20480;B6UXE6;B6UXE1;B6UXD9;B6UXF5;B6UXE7;B6UXE2;B6UXE0;Q5UHE2;B6UXF9;B6UXF6;B6UXG0;B6UXF4;B6UXF1;B6UXE5;B6UXE4;B6UXE3;B6UXF8;B6UXF7;B6UXD8;B6UXD4	tr|A0A0B4LI25|A0A0B4LI25_DROME Kinesin-like protein OS=Drosophila melanogaster GN=ncd PE=1 SV=1;sp|P20480|NCD_DROME Protein claret segregational OS=Drosophila melanogaster GN=ncd PE=1 SV=1;tr|B6UXE6|B6UXE6_DROME Kinesin-like protein (Fragment) OS=Drosophil	22	19	19	77.473	700	120.56	17.1	36.1	36.1	39484000	236850000	684560000
P45889	sp|P45889|ACTZ_DROME Actin-related protein 1 OS=Drosophila melanogaster GN=Arp1 PE=2 SV=2	1	4	4	42.719	376	24.34	15.2	10.4	10.4	38753000	53903000	144010000
Q9W1G6;A0A0B4LHE0;Q8MLQ5;Q8MKK5;Q9W1G5;A0A0B4LGD3	tr|Q9W1G6|Q9W1G6_DROME Kazachoc, isoform A OS=Drosophila melanogaster GN=kcc PE=1 SV=2;tr|A0A0B4LHE0|A0A0B4LHE0_DROME Kazachoc, isoform F OS=Drosophila melanogaster GN=kcc PE=1 SV=1;tr|Q8MLQ5|Q8MLQ5_DROME Kazachoc, isoform D OS=Drosophila melanogaster GN=k	6	6	6	115.71	1043	13.25	7.1	4.6	4.7	38575000	59341000	63781000
Q06849;Q9VD64	sp|Q06849|ARL2_DROME ADP-ribosylation factor-like protein 2 OS=Drosophila melanogaster GN=Arl2 PE=2 SV=2	2	6	6	20.834	184	31.282	46.7	46.7	39.1	38547000	95203000	151840000
A0A0B4K6K9;A0A0B4K7Y7;Q9VAW5;F9W345;F9W325;E1NZB5	tr|A0A0B4K6K9|A0A0B4K6K9_DROME La related protein, isoform F OS=Drosophila melanogaster GN=larp PE=1 SV=1;tr|A0A0B4K7Y7|A0A0B4K7Y7_DROME La related protein, isoform G OS=Drosophila melanogaster GN=larp PE=1 SV=1;sp|Q9VAW5|LARP_DROME La-related protein 1 OS	6	18	18	151.65	1409	68.838	11.9	16.8	18.2	38210000	115700000	543080000
Q9VMV9;E1JHT6;Q6NP20;Q9VMW2;Q9VMW4;E1JHT9;Q7KTP4	tr|Q9VMV9|Q9VMV9_DROME Reticulon-like protein OS=Drosophila melanogaster GN=Rtnl1 PE=1 SV=2;tr|E1JHT6|E1JHT6_DROME Reticulon-like protein OS=Drosophila melanogaster GN=Rtnl1 PE=1 SV=1;tr|Q6NP20|Q6NP20_DROME Reticulon-like protein (Fragment) OS=Drosophila m	7	9	7	63.938	595	44.443	17.6	14.3	18.8	38203000	73886000	101460000
C0MJ66;P23572	tr|C0MJ66|C0MJ66_DROME CG5363-PA OS=Drosophila melanogaster GN=CG5363 PE=3 SV=1;sp|P23572|CDK1_DROME Cyclin-dependent kinase 1 OS=Drosophila melanogaster GN=Cdk1 PE=1 SV=1	2	10	10	34.439	297	36.841	39.4	31.6	36.7	38035000	98349000	180660000
Q9V3W7	tr|Q9V3W7|Q9V3W7_DROME LD40489p OS=Drosophila melanogaster GN=SF2 PE=1 SV=1	1	9	9	28.35	255	18.471	20	20	31	37903000	48286000	277580000
Q9VCB7;Q95TZ2;B5RJ80	tr|Q9VCB7|Q9VCB7_DROME CG6204 OS=Drosophila melanogaster GN=GH20028p PE=4 SV=1;tr|Q95TZ2|Q95TZ2_DROME GH20028p OS=Drosophila melanogaster GN=CG6204 PE=2 SV=1;tr|B5RJ80|B5RJ80_DROME FI07760p (Fragment) OS=Drosophila melanogaster PE=2 SV=1	3	1	1	102.75	903	-2	1.8	1.8	0	37284000	57000000	0
Q9VPQ2	sp|Q9VPQ2|DJSHV_DROME DnaJ homolog shv OS=Drosophila melanogaster GN=shv PE=1 SV=1	1	5	5	40.211	354	24.596	12.7	16.1	16.1	37116000	158600000	323030000
Q9V438	sp|Q9V438|PDIA6_DROME Protein disulfide-isomerase A6 homolog OS=Drosophila melanogaster GN=CaBP1 PE=1 SV=1	1	5	5	46.751	433	12.707	14.3	12.5	5.5	37076000	76934000	33378000
M9MRF2;Q9VMU4	tr|M9MRF2|M9MRF2_DROME GEO09637p1 OS=Drosophila melanogaster GN=RpL37A PE=2 SV=1;sp|Q9VMU4|RL37A_DROME 60S ribosomal protein L37a OS=Drosophila melanogaster GN=RpL37A PE=1 SV=3	2	3	3	10.311	92	19.948	38	38	38	37066000	291690000	374830000
P35600	sp|P35600|RFC1_DROME Replication factor C subunit 1 OS=Drosophila melanogaster GN=Gnf1 PE=1 SV=2	1	15	15	108.61	986	60.809	12.2	12.6	19.8	36855000	90350000	322570000
M9NEU5;P25843	tr|M9NEU5|M9NEU5_DROME Profilin OS=Drosophila melanogaster GN=chic PE=2 SV=1;sp|P25843|PROF_DROME Profilin OS=Drosophila melanogaster GN=chic PE=1 SV=1	2	5	5	13.723	126	62.724	59.5	67.5	67.5	36524000	260860000	420790000
P52029	sp|P52029|G6PI_DROME Glucose-6-phosphate isomerase OS=Drosophila melanogaster GN=Pgi PE=2 SV=2	1	11	11	62.338	558	61.918	14.7	24.9	23.3	36250000	186020000	278650000
Q968K4;Q95U54	tr|Q968K4|Q968K4_DROME MMS19 OS=Drosophila melanogaster GN=Mms19 PE=2 SV=1;tr|Q95U54|Q95U54_DROME GH06271p OS=Drosophila melanogaster GN=Mms19 PE=1 SV=1	2	12	12	106.95	959	53.564	12.5	13.6	13.1	36087000	67185000	146930000
Q9XZ06;A9YHI1;A9YHH1;A9YHH9	sp|Q9XZ06|NU931_DROME Nuclear pore complex protein Nup93-1 OS=Drosophila melanogaster GN=Nup93-1 PE=1 SV=1	4	13	13	93.851	823	127.3	16.8	18.6	22.8	35837000	176000000	497060000
A4V0U4;Q9VJ39	tr|A4V0U4|A4V0U4_DROME Leukotriene A(4) hydrolase OS=Drosophila melanogaster GN=mRpL13 PE=1 SV=1;tr|Q9VJ39|Q9VJ39_DROME Leukotriene A(4) hydrolase OS=Drosophila melanogaster GN=mRpL13 PE=1 SV=4	2	19	19	68.489	613	183.85	21.5	31.2	48.5	35670000	124660000	796000000
Q9VZU8;Q95SA2	tr|Q9VZU8|Q9VZU8_DROME CG1291 OS=Drosophila melanogaster GN=Dmel\CG1291 PE=1 SV=1;tr|Q95SA2|Q95SA2_DROME GM04690p OS=Drosophila melanogaster GN=CG1291 PE=2 SV=1	2	8	8	48.598	424	43.617	21.5	21.5	24.1	35602000	194810000	304050000
Q9VJD4	tr|Q9VJD4|Q9VJD4_DROME LD24721p OS=Drosophila melanogaster GN=Sgt PE=1 SV=1	1	6	6	36.253	331	30.189	15.1	12.7	6.6	35582000	82784000	63366000
Q9TWZ1;Q3YMU0;Q95T75	tr|Q9TWZ1|Q9TWZ1_DROME Protein disulfide-isomerase OS=Drosophila melanogaster PE=3 SV=1;tr|Q3YMU0|Q3YMU0_DROME Protein disulfide-isomerase (Fragment) OS=Drosophila melanogaster GN=ERp60 PE=1 SV=1;tr|Q95T75|Q95T75_DROME Protein disulfide-isomerase OS=Drosop	3	7	7	55.372	489	28.585	17.4	20	15.1	35513000	132400000	120040000
Q24319	sp|Q24319|OST48_DROME Dolichyl-diphosphooligosaccharide--protein glycosyltransferase 48 kDa subunit OS=Drosophila melanogaster GN=Ost48 PE=2 SV=2	1	10	10	49.98	449	37.904	18.9	27.6	21.2	35425000	192220000	142440000
Q9VDH8;Q7JYY0	tr|Q9VDH8|Q9VDH8_DROME 40S ribosomal protein S30 OS=Drosophila melanogaster GN=RpS30 PE=1 SV=1;tr|Q7JYY0|Q7JYY0_DROME 40S ribosomal protein S30 (Fragment) OS=Drosophila melanogaster GN=RpS30 PE=2 SV=1	2	3	3	14.585	132	13.602	12.9	13.6	12.9	35298000	252590000	216820000
M9PB68;Q9VLT5	tr|M9PB68|M9PB68_DROME Purity of essence, isoform B OS=Drosophila melanogaster GN=poe PE=4 SV=1;sp|Q9VLT5|POE_DROME Protein purity of essence OS=Drosophila melanogaster GN=poe PE=1 SV=1	2	17	17	590.7	5322	40.008	3.7	2.8	3.8	35280000	83365000	182940000
Q9V3D9;Q8T3P8	tr|Q9V3D9|Q9V3D9_DROME Signal recognition particle 54 kDa protein OS=Drosophila melanogaster GN=Srp54k PE=1 SV=1;tr|Q8T3P8|Q8T3P8_DROME Signal recognition particle 54 kDa protein OS=Drosophila melanogaster GN=Srp54k PE=2 SV=1	2	8	8	55.865	508	36.866	17.1	14.4	15.9	35084000	131940000	257670000
Q9VVU1;Q95U46	tr|Q9VVU1|Q9VVU1_DROME CG3902 OS=Drosophila melanogaster GN=GH07925p PE=1 SV=1;tr|Q95U46|Q95U46_DROME GH07925p OS=Drosophila melanogaster GN=CG3902 PE=2 SV=1	2	8	8	45.366	414	40.235	22	24.4	19.8	34674000	440640000	143630000
Q7KLW9;Q24055	tr|Q7KLW9|Q7KLW9_DROME BcDNA.LD02793 OS=Drosophila melanogaster GN=Prp19 PE=1 SV=1	2	11	11	55.198	505	113.05	25	20.4	34.7	34586000	67977000	560870000
Q4AB57;P84051	tr|Q4AB57|Q4AB57_DROME Histone H2A OS=Drosophila melanogaster GN=His2A:CG33859 PE=3 SV=1;sp|P84051|H2A_DROME Histone H2A OS=Drosophila melanogaster GN=His2A PE=1 SV=2	2	5	3	13.364	124	42.781	30.6	41.9	60.5	34289000	774220000	330480000
Q4ABD8;Q4AB94;Q4AB54;P02255;Q4ABE3;Q5BI49;C4IY08	tr|Q4ABD8|Q4ABD8_DROME Histone H1 OS=Drosophila melanogaster GN=His1:CG33807 PE=3 SV=1;tr|Q4AB94|Q4AB94_DROME Histone H1 OS=Drosophila melanogaster GN=His1:CG33834 PE=3 SV=1;tr|Q4AB54|Q4AB54_DROME Histone H1 OS=Drosophila melanogaster GN=His1:CG33861 PE=3	7	6	6	26.36	256	80.555	7.8	20.7	12.1	34260000	154700000	97014000
A0A0C4DHG5;P26686	tr|A0A0C4DHG5|A0A0C4DHG5_DROME B52, isoform O OS=Drosophila melanogaster GN=B52 PE=4 SV=1;sp|P26686|SRR55_DROME Serine-arginine protein 55 OS=Drosophila melanogaster GN=B52 PE=1 SV=4	2	4	4	40.381	355	13.055	7.6	11	11	34246000	172450000	631990000
Q9VWB8;Q8IQV9;B6IDH1;Q8MSV6;Q3YMV0;A9YI14;A9YI11;A9YI10;A9YI09	tr|Q9VWB8|Q9VWB8_DROME Nucleoporin 205kD, isoform A OS=Drosophila melanogaster GN=Nup205 PE=1 SV=2;tr|Q8IQV9|Q8IQV9_DROME Nucleoporin 205kD, isoform B OS=Drosophila melanogaster GN=Nup205 PE=1 SV=1	9	17	17	232.73	2067	127.38	5.4	9.2	9.4	33871000	168570000	383730000
Q86BA5;Q9I7K5	tr|Q86BA5|Q86BA5_DROME LP01981p OS=Drosophila melanogaster GN=p24-2 PE=2 SV=1;sp|Q9I7K5|TMEDE_DROME Transmembrane emp24 domain-containing protein eca OS=Drosophila melanogaster GN=eca PE=2 SV=2	2	3	3	28.176	244	29.81	11.5	11.5	11.5	33255000	99996000	106360000
Q9VMH2	tr|Q9VMH2|Q9VMH2_DROME Actin-related protein 2/3 complex subunit 4 OS=Drosophila melanogaster GN=Arpc4 PE=1 SV=1	1	5	5	19.578	168	13.708	25	29.8	29.8	33204000	56384000	215470000
A0A0C4DHE8;Q9VH69;Q8IHD2;Q8IH91;I7CP40	tr|A0A0C4DHE8|A0A0C4DHE8_DROME GEO09636p1 OS=Drosophila melanogaster GN=RpS29 PE=1 SV=1;sp|Q9VH69|RS29_DROME 40S ribosomal protein S29 OS=Drosophila melanogaster GN=RpS29 PE=1 SV=1;tr|Q8IHD2|Q8IHD2_DROME AT13329p (Fragment) OS=Drosophila melanogaster GN=Rp	5	3	3	6.5906	56	11.198	48.2	48.2	48.2	32999000	210150000	263650000
Q9VKZ8	tr|Q9VKZ8|Q9VKZ8_DROME LP08774p OS=Drosophila melanogaster GN=Usp14 PE=1 SV=1	1	9	9	53.707	475	40.856	22.9	29.1	26.3	32786000	89278000	198730000
E2QD75;Q7K4N3	tr|E2QD75|E2QD75_DROME Cap binding protein 80, isoform B OS=Drosophila melanogaster GN=Cbp80 PE=1 SV=1;sp|Q7K4N3|NCBP1_DROME Nuclear cap-binding protein subunit 1 OS=Drosophila melanogaster GN=Cbp80 PE=1 SV=1	2	12	12	93.226	800	35.976	16.2	16.8	14	32625000	168730000	239740000
P52304;B6UXN9;B6UXR5	sp|P52304|POLO_DROME Serine/threonine-protein kinase polo OS=Drosophila melanogaster GN=polo PE=1 SV=2;tr|B6UXN9|B6UXN9_DROME Polo (Fragment) OS=Drosophila melanogaster GN=polo PE=4 SV=1;tr|B6UXR5|B6UXR5_DROME Polo (Fragment) OS=Drosophila melanogaster GN=	3	13	13	66.973	576	132.17	19.6	23.4	21.2	32041000	118470000	497320000
Q9VZ69;Q0KHU2;Q8IR99;Q8IGK4;E1JJM0;M9NF14;A9YL40;F6J5L2	tr|Q9VZ69|Q9VZ69_DROME IGF-II mRNA-binding protein OS=Drosophila melanogaster GN=Imp PE=1 SV=2;tr|Q0KHU2|Q0KHU2_DROME IGF-II mRNA-binding protein, isoform K OS=Drosophila melanogaster GN=Imp PE=1 SV=2;tr|Q8IR99|Q8IR99_DROME IGF-II mRNA-binding protein, iso	8	13	13	62.129	566	186.1	12.5	25.4	31.6	31821000	338170000	1040400000
A0A0B4KGE6;A0A0B4KFH4;P26270	tr|A0A0B4KGE6|A0A0B4KGE6_DROME Regulatory particle non-ATPase 8, isoform C OS=Drosophila melanogaster GN=Rpn8 PE=4 SV=1;tr|A0A0B4KFH4|A0A0B4KFH4_DROME Regulatory particle non-ATPase 8, isoform B OS=Drosophila melanogaster GN=Rpn8 PE=4 SV=1;sp|P26270|PSMD7_	3	8	8	38.089	338	38.226	33.4	36.1	26	31693000	140440000	188310000
Q9XZE4;Q0E8E8	tr|Q9XZE4|Q9XZE4_DROME Phosphate transporter OS=Drosophila melanogaster GN=Mpcp2 PE=2 SV=1;tr|Q0E8E8|Q0E8E8_DROME MIP08013p1 OS=Drosophila melanogaster GN=Mpcp2 PE=1 SV=1	2	3	3	38.878	356	8.3749	10.1	10.1	10.1	31094000	49576000	109590000
T2FFJ2;Q9VQR8;Q8MRF8	tr|T2FFJ2|T2FFJ2_DROME FI21214p1 OS=Drosophila melanogaster GN=CG33123-RA PE=2 SV=1;tr|Q9VQR8|Q9VQR8_DROME Leucyl-tRNA synthetase, isoform A OS=Drosophila melanogaster GN=LeuRS PE=1 SV=2;tr|Q8MRF8|Q8MRF8_DROME SD07726p OS=Drosophila melanogaster GN=LeuRS P	3	11	11	134.89	1182	38.412	9.7	9.1	10.8	30551000	48250000	114100000
Q8SYL1	tr|Q8SYL1|Q8SYL1_DROME Lethal (2) 09851, isoform A OS=Drosophila melanogaster GN=l(2)09851 PE=1 SV=1	1	9	9	50.683	456	97.748	23	27.6	27.6	30282000	137020000	495430000
Q7JRC3;C8AXZ5;C8AXY5;C8AXY2;C8AXY1;C8AXY8;Q95U55	tr|Q7JRC3|Q7JRC3_DROME Epoxide hydrolase OS=Drosophila melanogaster GN=Jheh1 PE=2 SV=1;tr|C8AXZ5|C8AXZ5_DROME Epoxide hydrolase OS=Drosophila melanogaster GN=Jheh1 PE=3 SV=1;tr|C8AXY5|C8AXY5_DROME Epoxide hydrolase OS=Drosophila melanogaster GN=Jheh1 PE=3	7	8	8	54.741	474	25.962	23.2	23.2	12.9	30278000	75099000	39850000
Q7KPK6;O61444;Q7KPX5	tr|Q7KPK6|Q7KPK6_DROME JNK kinase 2 OS=Drosophila melanogaster GN=Mkk4 PE=2 SV=1;tr|O61444|O61444_DROME MAP kinase kinase 4, isoform A OS=Drosophila melanogaster GN=Mkk4 PE=1 SV=1;tr|Q7KPX5|Q7KPX5_DROME MAP kinase kinase 4 OS=Drosophila melanogaster GN=Mkk	3	6	6	47.545	424	33.136	19.3	23.8	19.3	30221000	87977000	160360000
O46050;Q9UB80	tr|O46050|O46050_DROME 60S ribosomal export protein NMD3 OS=Drosophila melanogaster GN=Nmd3 PE=1 SV=1;tr|Q9UB80|Q9UB80_DROME 60S ribosomal export protein NMD3 OS=Drosophila melanogaster GN=Nmd3 PE=2 SV=1	2	14	14	59.124	521	88.554	16.5	32.1	39	30074000	158990000	648240000
M9MRT6;P08645	tr|M9MRT6|M9MRT6_DROME Rap1 GTPase, isoform B OS=Drosophila melanogaster GN=Rap1 PE=4 SV=1;sp|P08645|RAS3_DROME Ras-like protein 3 OS=Drosophila melanogaster GN=R PE=2 SV=2	2	4	4	20.863	184	21.204	13.6	19.6	18.5	29981000	88838000	117060000
E1JGV6;H5V894;C0P8M5;O44081;A0A0B4K8B2	tr|E1JGV6|E1JGV6_DROME Nucleolar protein at 60B, isoform C OS=Drosophila melanogaster GN=Nop60B PE=1 SV=1;tr|H5V894|H5V894_DROME FI18403p1 (Fragment) OS=Drosophila melanogaster GN=Nop60B-RC PE=2 SV=1;tr|C0P8M5|C0P8M5_DROME MIP05689p (Fragment) OS=Drosophil	5	20	20	56.83	508	164.89	17.9	48.6	31.7	29368000	1200000000	387880000
G4LU22;Q8SXD0;Q5KU10;Q9VJ59	tr|G4LU22|G4LU22_DROME PRA1 family protein OS=Drosophila melanogaster GN=CG10373-RA PE=2 SV=1;tr|Q8SXD0|Q8SXD0_DROME PRA1 family protein OS=Drosophila melanogaster GN=Jwa PE=2 SV=1;tr|Q5KU10|Q5KU10_DROME PRA1 family protein OS=Drosophila melanogaster GN=dp	4	4	4	22.839	207	32.829	16.9	36.2	36.2	29283000	108660000	131400000
Q9VUC1;M9MSL3;Q9XZT5	tr|Q9VUC1|Q9VUC1_DROME Hsc70Cb, isoform A OS=Drosophila melanogaster GN=Hsc70Cb PE=1 SV=1;tr|M9MSL3|M9MSL3_DROME Hsc70Cb, isoform G OS=Drosophila melanogaster GN=Hsc70Cb PE=1 SV=1;tr|Q9XZT5|Q9XZT5_DROME Heatshock protein cognate 70Cb OS=Drosophila melanoga	3	7	7	88.5	804	24.249	12.8	10.3	11.7	28910000	32926000	57175000
Q9VTZ4	tr|Q9VTZ4|Q9VTZ4_DROME Phosphoacetylglucosamine mutase OS=Drosophila melanogaster GN=nst PE=1 SV=1	1	10	10	60.58	549	51.401	17.5	21.5	27.5	28885000	155960000	296210000
A0A0B4LFR4;Q7K110	tr|A0A0B4LFR4|A0A0B4LFR4_DROME Oligosaccharide transferase delta subunit, isoform B OS=Drosophila melanogaster GN=OstDelta PE=1 SV=1;tr|Q7K110|Q7K110_DROME LD18774p OS=Drosophila melanogaster GN=OstDelta PE=1 SV=1	2	10	10	69.1	633	32.419	11.5	21.6	16.6	28806000	156670000	198200000
Q7KB18;Q8SZM7;C8AXZ8;C8AXZ6;B8Q7Y1;B8Q7S9;B8Q7T7	tr|Q7KB18|Q7KB18_DROME Epoxide hydrolase OS=Drosophila melanogaster GN=Jheh2 PE=1 SV=1;tr|Q8SZM7|Q8SZM7_DROME Epoxide hydrolase OS=Drosophila melanogaster GN=Jheh2 PE=2 SV=1;tr|C8AXZ8|C8AXZ8_DROME JHEH2 (Fragment) OS=Drosophila melanogaster GN=Jheh2 PE=4 S	7	8	8	52.005	463	46.967	18.1	26.1	26.1	28637000	97671000	91990000
M9PDK5;Q9V3J1	tr|M9PDK5|M9PDK5_DROME Vacuolar H[+]-ATPase SFD subunit, isoform E OS=Drosophila melanogaster GN=VhaSFD PE=4 SV=1;sp|Q9V3J1|VATH_DROME V-type proton ATPase subunit H OS=Drosophila melanogaster GN=VhaSFD PE=2 SV=2	2	14	14	53.733	468	108.78	20.9	43.2	26.7	28585000	180570000	86044000
M9NG50;M9PHG2;C7LAH9;C9QP54;P46150	tr|M9NG50|M9NG50_DROME Moesin, isoform L OS=Drosophila melanogaster GN=Moe PE=1 SV=1;tr|M9PHG2|M9PHG2_DROME Moesin, isoform M OS=Drosophila melanogaster GN=Moe PE=1 SV=1;tr|C7LAH9|C7LAH9_DROME Moesin, isoform K OS=Drosophila melanogaster GN=Moe PE=1 SV=1;t	5	7	7	68.14	578	16.585	12.5	9.2	8.7	28499000	46173000	58911000
O97182	tr|O97182|O97182_DROME Actin-related protein 2/3 complex subunit OS=Drosophila melanogaster GN=Arpc1 PE=1 SV=1	1	6	6	41.601	377	105.46	14.3	13.5	22.5	28412000	55166000	227730000
A4V449;Q6NP42;Q94511;Q8MM97	tr|A4V449|A4V449_DROME NADH dehydrogenase (Ubiquinone) 75 kDa subunit, isoform B OS=Drosophila melanogaster GN=ND-75 PE=1 SV=1;tr|Q6NP42|Q6NP42_DROME RE66734p (Fragment) OS=Drosophila melanogaster GN=ND75 PE=2 SV=1;sp|Q94511|NDUS1_DROME NADH-ubiquinone oxi	4	12	12	78.629	731	94.99	20.9	8.8	25.2	28138000	14702000	444420000
Q8T9H5;A1Z9M2;F0JAH0	tr|Q8T9H5|Q8T9H5_DROME Receptor expression-enhancing protein OS=Drosophila melanogaster GN=CG8331 PE=2 SV=1;tr|A1Z9M2|A1Z9M2_DROME Receptor expression-enhancing protein OS=Drosophila melanogaster GN=CG8331 PE=3 SV=1;tr|F0JAH0|F0JAH0_DROME Receptor expressi	3	2	2	20.184	178	5.6446	4.5	11.2	11.2	28127000	65207000	79793000
A1YK62;A1YK65;A1YK63;A1YK61;A1YK60;A1YK58;A1YK57;Q9V466;A1YK55;A1YK56;A1YK54;A1YK59	tr|A1YK62|A1YK62_DROME Nup107 OS=Drosophila melanogaster GN=Nup107 PE=4 SV=1;tr|A1YK65|A1YK65_DROME Nup107 OS=Drosophila melanogaster GN=Nup107 PE=4 SV=1;tr|A1YK63|A1YK63_DROME Nup107 OS=Drosophila melanogaster GN=Nup107 PE=4 SV=1;tr|A1YK61|A1YK61_DROME Nu	12	16	16	97.395	845	50.348	10.4	23	18.8	28106000	196290000	263380000
B7FNN6;P05389	tr|B7FNN6|B7FNN6_DROME LP06614p (Fragment) OS=Drosophila melanogaster GN=RpLP2-RB PE=2 SV=1;sp|P05389|RLA2_DROME 60S acidic ribosomal protein P2 OS=Drosophila melanogaster GN=RpLP2 PE=1 SV=1	2	3	3	13.924	131	15.319	25.2	25.2	25.2	28092000	229750000	104920000
Q9XZ57;Q7JZD3;Q6NNE2;A1Z6P3;D3DMK3;D6W4V6	tr|Q9XZ57|Q9XZ57_DROME Eb1, isoform E OS=Drosophila melanogaster GN=Eb1 PE=1 SV=1;tr|Q7JZD3|Q7JZD3_DROME Eb1, isoform A OS=Drosophila melanogaster GN=Eb1 PE=1 SV=1;tr|Q6NNE2|Q6NNE2_DROME RH07059p OS=Drosophila melanogaster GN=Eb1 PE=2 SV=1;tr|A1Z6P3|A1Z6P3	6	4	3	32.488	290	19.374	12.8	11.4	12.8	27871000	20306000	51292000
P20353	sp|P20353|GNAI_DROME G protein alpha i subunit OS=Drosophila melanogaster GN=Galphai PE=1 SV=2	1	3	2	40.595	355	7.4619	11	7.3	11	27752000	7281500	68631000
M9NFR5;Q95RE4;O46173	tr|M9NFR5|M9NFR5_DROME Ypsilon schachtel, isoform B OS=Drosophila melanogaster GN=yps PE=1 SV=1;tr|Q95RE4|Q95RE4_DROME LD37574p OS=Drosophila melanogaster GN=yps PE=1 SV=1;tr|O46173|O46173_DROME Y-box protein OS=Drosophila melanogaster GN=yps PE=2 SV=1	3	4	4	36.978	340	28.239	22.9	23.2	6.8	27729000	102700000	0
A0A0B4LHH1;Q960R0;Q9W1B5;A0A0B4LGJ9;C1C3C6	tr|A0A0B4LHH1|A0A0B4LHH1_DROME CG3209, isoform E OS=Drosophila melanogaster GN=CG3209 PE=1 SV=1;tr|Q960R0|Q960R0_DROME CG3209, isoform B OS=Drosophila melanogaster GN=CG3209 PE=1 SV=1;tr|Q9W1B5|Q9W1B5_DROME CG3209, isoform C OS=Drosophila melanogaster GN=C	5	8	8	43.551	380	38.385	13.2	20.5	23.4	27386000	79437000	90837000
Q9VQL1;Q95TC0	tr|Q9VQL1|Q9VQL1_DROME LP20978p OS=Drosophila melanogaster GN=SerRS PE=1 SV=1	2	8	8	56.455	501	67.467	15.6	17.2	24.8	27284000	68462000	377250000
Q8T410;Q86P47;Q0KHZ9;Q9VAL7;Q86P87;O02393;Q9VXF6;Q24097;Q9I7S9	tr|Q8T410|Q8T410_DROME AT22968p OS=Drosophila melanogaster GN=Cnx99A PE=2 SV=1;tr|Q86P47|Q86P47_DROME SD17909p (Fragment) OS=Drosophila melanogaster GN=Cnx99A PE=2 SV=1;tr|Q0KHZ9|Q0KHZ9_DROME Calnexin 99A, isoform E OS=Drosophila melanogaster GN=Cnx99A PE=	9	9	9	67.522	601	28.004	15.8	15.1	20.5	27195000	125730000	277020000
M9PG22;P61209	tr|M9PG22|M9PG22_DROME ADP ribosylation factor at 79F, isoform J OS=Drosophila melanogaster GN=Arf79F PE=3 SV=1;sp|P61209|ARF1_DROME ADP-ribosylation factor 1 OS=Drosophila melanogaster GN=Arf79F PE=1 SV=2	2	4	2	20.688	182	10.107	30.8	23.1	23.1	27062000	8417200	9458800
A8JRB8;A8JRC1;Q8MT18	tr|A8JRB8|A8JRB8_DROME CG5028, isoform C OS=Drosophila melanogaster GN=Dmel\CG5028 PE=1 SV=1;tr|A8JRC1|A8JRC1_DROME CG5028, isoform D OS=Drosophila melanogaster GN=Dmel\CG5028 PE=1 SV=1;tr|Q8MT18|Q8MT18_DROME CG5028, isoform A OS=Drosophila melanogaster GN	3	8	8	43.201	392	89.229	15.1	21.7	21.9	26965000	139820000	238970000
Q9V431	sp|Q9V431|API5_DROME Apoptosis inhibitor 5 homolog OS=Drosophila melanogaster GN=Aac11 PE=2 SV=1	1	13	13	59.929	536	193.51	21.5	35.8	31.5	26927000	149130000	376510000
Q9VKD3	sp|Q9VKD3|NFS1_DROME Probable cysteine desulfurase, mitochondrial OS=Drosophila melanogaster GN=CG12264 PE=2 SV=1	1	7	7	51.074	462	19.473	16	16	18.8	26905000	75465000	202520000
M9PCL4;Q9VMV6	tr|M9PCL4|M9PCL4_DROME CG3887, isoform B OS=Drosophila melanogaster GN=Dmel\CG3887 PE=4 SV=1;sp|Q9VMV6|SELT_DROME Thioredoxin reductase-like selenoprotein T homolog CG3887 OS=Drosophila melanogaster GN=CG3887 PE=2 SV=1	2	3	3	22.323	198	23.022	14.6	20.7	10.6	26765000	66494000	40598000
M9PBH7;P40792;M9PBU2;P48554	tr|M9PBH7|M9PBH7_DROME Rac1, isoform B OS=Drosophila melanogaster GN=Rac1 PE=3 SV=1;sp|P40792|RAC1_DROME Ras-related protein Rac1 OS=Drosophila melanogaster GN=Rac1 PE=1 SV=2;tr|M9PBU2|M9PBU2_DROME Rac2, isoform B OS=Drosophila melanogaster GN=Rac2 PE=3 SV	4	3	2	21.354	192	4.8431	15.1	10.9	15.1	26680000	16265000	72849000
F6J6B9;X2JF59;Q9V3P0	tr|F6J6B9|F6J6B9_DROME CG1633 (Fragment) OS=Drosophila melanogaster GN=CG1633 PE=4 SV=1;tr|X2JF59|X2JF59_DROME Thioredoxin peroxidase 1, isoform C OS=Drosophila melanogaster GN=Jafrac1 PE=1 SV=1;sp|Q9V3P0|PRDX1_DROME Peroxiredoxin 1 OS=Drosophila melanogas	3	2	2	19.858	175	8.4479	14.3	6.3	14.3	26403000	42590000	62634000
Q7KNA0	sp|Q7KNA0|DYM_DROME Dymeclin OS=Drosophila melanogaster GN=CG8230 PE=1 SV=1	1	6	6	79.124	699	19.578	10.4	10.4	10.4	26235000	92445000	99653000
I1V4Y8;Q24368	tr|I1V4Y8|I1V4Y8_DROME Imitation SWI OS=Drosophila melanogaster GN=ISWI PE=3 SV=1;sp|Q24368|ISWI_DROME Chromatin-remodeling complex ATPase chain Iswi OS=Drosophila melanogaster GN=Iswi PE=1 SV=1	2	15	15	113.37	1027	39.973	7.6	8.6	13.7	26177000	80067000	236700000
Q9V677	sp|Q9V677|ECM29_DROME Proteasome-associated protein ECM29 homolog OS=Drosophila melanogaster GN=CG8858 PE=1 SV=1	1	14	14	212.08	1890	24.431	7.4	7.9	5.4	26077000	48830000	64272000
Q9VMM3;Q95S90	tr|Q9VMM3|Q9VMM3_DROME CG7239 OS=Drosophila melanogaster GN=anon-EST:Posey250 PE=1 SV=1;tr|Q95S90|Q95S90_DROME GM05640p OS=Drosophila melanogaster GN=CG7239 PE=2 SV=1	2	4	4	52.037	459	9.6162	10.9	0	5.2	26058000	0	32554000
A0A126GUU7;Q9VEX9	tr|A0A126GUU7|A0A126GUU7_DROME Bicoid interacting protein 1, isoform B OS=Drosophila melanogaster GN=Bin1 PE=2 SV=1;sp|Q9VEX9|SAP18_DROME Histone deacetylase complex subunit SAP18 OS=Drosophila melanogaster GN=Bin1 PE=1 SV=1	2	4	4	17.287	150	22.293	20	0	32.7	26053000	0	160720000
B7YZQ7;I0DHK6;O77460;A0A0B4K7G9;B9EQY3	tr|B7YZQ7|B7YZQ7_DROME Nucleosome remodeling factor-38kD, isoform B OS=Drosophila melanogaster GN=Nurf-38 PE=1 SV=1;tr|I0DHK6|I0DHK6_DROME FI20112p1 (Fragment) OS=Drosophila melanogaster GN=Nurf-38-RA PE=2 SV=1;sp|O77460|IPYR_DROME Inorganic pyrophosphatas	5	6	6	32.646	290	61.759	28.6	22.8	37.9	25927000	63621000	186200000
P32234	sp|P32234|128UP_DROME GTP-binding protein 128up OS=Drosophila melanogaster GN=128up PE=2 SV=2	1	9	9	41.131	368	58.245	25.8	26.1	32.6	25909000	98275000	269880000
A0A0B4LEV2;Q26454;Q5BI95	tr|A0A0B4LEV2|A0A0B4LEV2_DROME DNA helicase OS=Drosophila melanogaster GN=dpa PE=1 SV=1;sp|Q26454|MCM4_DROME DNA replication licensing factor MCM4 OS=Drosophila melanogaster GN=dpa PE=1 SV=2	3	12	12	96.609	866	102.25	11.3	14.1	18.6	25862000	108610000	315220000
P48148	sp|P48148|RHO1_DROME Ras-like GTP-binding protein Rho1 OS=Drosophila melanogaster GN=Rho1 PE=1 SV=1	1	5	5	21.723	192	13.504	30.2	23.4	27.6	25814000	24700000	70207000
O18373	sp|O18373|SPS1_DROME Selenide, water dikinase OS=Drosophila melanogaster GN=SelD PE=2 SV=1	1	7	7	43.446	398	40.152	12.3	21.1	21.4	25784000	122350000	154140000
Q9VEZ3;Q9U5W6;E1JIM4;A0A0B4K664;A0A0B4K700;D3DMH7;Q95TZ9	sp|Q9VEZ3|MSPS_DROME Protein mini spindles OS=Drosophila melanogaster GN=msps PE=1 SV=3;tr|Q9U5W6|Q9U5W6_DROME Microtubule associated protein OS=Drosophila melanogaster GN=msps PE=4 SV=1;tr|E1JIM4|E1JIM4_DROME Mini spindles, isoform B OS=Drosophila melanog	7	16	16	225.98	2042	65.416	6.5	3.4	9.8	25745000	31331000	170110000
Q9V3A8	tr|Q9V3A8|Q9V3A8_DROME Ergic53, isoform A OS=Drosophila melanogaster GN=ergic53 PE=1 SV=1	1	7	7	57.568	512	25.981	19.3	19.3	15	25721000	133410000	137180000
M9MS06;F0JAG6;M9PGA7;P18091	tr|M9MS06|M9MS06_DROME Alpha actinin, isoform D OS=Drosophila melanogaster GN=Actn PE=1 SV=1;tr|F0JAG6|F0JAG6_DROME Alpha actinin, isoform F OS=Drosophila melanogaster GN=Actn PE=1 SV=1;tr|M9PGA7|M9PGA7_DROME Alpha actinin, isoform G OS=Drosophila melanoga	4	8	8	103.83	895	16.322	10.2	2.3	2.2	25657000	49381000	20692000
A0A0B4KGX1;A0A0B4LHV4;H1UUJ8;Q01989	tr|A0A0B4KGX1|A0A0B4KGX1_DROME Jaguar, isoform L OS=Drosophila melanogaster GN=jar PE=1 SV=1;tr|A0A0B4LHV4|A0A0B4LHV4_DROME Jaguar, isoform N OS=Drosophila melanogaster GN=jar PE=1 SV=1;tr|H1UUJ8|H1UUJ8_DROME FI18104p1 OS=Drosophila melanogaster GN=jar PE=	4	8	8	144.94	1268	20.475	6.5	0.9	5.1	25647000	0	25709000
Q4V525;A1ZB09	tr|Q4V525|Q4V525_DROME IP13359p OS=Drosophila melanogaster GN=CG30325 PE=2 SV=1;tr|A1ZB09|A1ZB09_DROME Uncharacterized protein OS=Drosophila melanogaster GN=CG30325 PE=4 SV=1	2	1	1	76.631	665	-2	2	2	2	25129000	110050000	126460000
A1YK08;A1YK07;A1YK02;A1YK01;A1YK00;H1UUL1;A1YK11;A1YK03	tr|A1YK08|A1YK08_DROME Nup75 OS=Drosophila melanogaster GN=Nup75 PE=4 SV=1;tr|A1YK07|A1YK07_DROME Nup75 OS=Drosophila melanogaster GN=Nup75 PE=4 SV=1;sp|A1YK02|NUP75_DROME Nuclear pore complex protein Nup75 OS=Drosophila melanogaster GN=Nup75 PE=2 SV=1;tr|	8	11	11	76.871	668	45.423	15.4	18.3	13.8	25078000	118120000	87298000
A8E6K0;Q7KVQ0	tr|A8E6K0|A8E6K0_DROME H/ACA ribonucleoprotein complex subunit OS=Drosophila melanogaster GN=CG4038 PE=2 SV=1;sp|Q7KVQ0|GAR1_DROME Probable H/ACA ribonucleoprotein complex subunit 1 OS=Drosophila melanogaster GN=CG4038 PE=2 SV=1	2	5	5	22.665	237	23.49	17.7	27.4	21.5	25075000	410690000	81972000
Q7K2E1	tr|Q7K2E1|Q7K2E1_DROME CG8839, isoform A OS=Drosophila melanogaster GN=CG8839 PE=1 SV=1	1	6	6	58.263	529	20.937	17.4	14.6	13.6	25060000	49186000	66683000
Q9VJD1	tr|Q9VJD1|Q9VJD1_DROME Glucosidase 2 beta subunit, isoform A OS=Drosophila melanogaster GN=GCS2beta PE=1 SV=1	1	13	13	61.539	548	124.95	14.6	23.5	25.4	24946000	174360000	662120000
Q8MKK1;Q8MTU4	tr|Q8MKK1|Q8MKK1_DROME RH09246p OS=Drosophila melanogaster GN=AIMP3 PE=1 SV=1;tr|Q8MTU4|Q8MTU4_DROME RH48588p (Fragment) OS=Drosophila melanogaster GN=AIMP3 PE=2 SV=1	2	4	4	19.979	179	19.431	14.5	35.2	35.2	24730000	109470000	140580000
Q8INM3;Q9VGZ8	sp|Q8INM3|SLE_DROME Protein slender lobes OS=Drosophila melanogaster GN=sle PE=1 SV=1	2	24	24	158.65	1420	197.53	5.9	14.3	24.5	24726000	464860000	997630000
P08646	sp|P08646|RAS1_DROME Ras-like protein 1 OS=Drosophila melanogaster GN=Ras85D PE=1 SV=2	1	3	3	21.593	189	5.9273	23.8	10.6	23.8	24717000	9873100	90501000
Q94523	sp|Q94523|SDHA_DROME Succinate dehydrogenase [ubiquinone] flavoprotein subunit, mitochondrial OS=Drosophila melanogaster GN=SdhA PE=2 SV=3	1	5	5	72.342	661	63.165	8.3	8.3	10.3	24639000	68445000	131440000
Q9VYT6	tr|Q9VYT6|Q9VYT6_DROME RE49489p OS=Drosophila melanogaster GN=p24-1 PE=1 SV=1	1	2	2	23.501	210	4.8559	9.5	9.5	9.5	24528000	68341000	55621000
E9P245;A8VEL0;Q9V4N3	tr|E9P245|E9P245_DROME Cyt-b5-PB OS=Drosophila melanogaster GN=dpld PE=2 SV=1;tr|A8VEL0|A8VEL0_DROME Cytochrome b5 OS=Drosophila melanogaster PE=2 SV=1;sp|Q9V4N3|CYB5_DROME Cytochrome b5 OS=Drosophila melanogaster GN=Cyt-b5 PE=2 SV=1	3	3	3	15.206	134	50.721	31.3	31.3	31.3	24319000	123720000	109400000
Q7KUB0;Q8IQA7;Q9VSI6;Q7KUB1;B7Z0E0;C8VV61	tr|Q7KUB0|Q7KUB0_DROME Isocitrate dehydrogenase [NADP] OS=Drosophila melanogaster GN=Idh PE=1 SV=1;tr|Q8IQA7|Q8IQA7_DROME Isocitrate dehydrogenase [NADP] OS=Drosophila melanogaster GN=Idh PE=1 SV=1;tr|Q9VSI6|Q9VSI6_DROME Isocitrate dehydrogenase [NADP] OS=	6	10	10	46.66	416	97.143	20	25.2	29.3	24290000	88755000	411320000
X2JAI2;Q9VIM5	tr|X2JAI2|X2JAI2_DROME Arp2/3 complex 34 kDa subunit OS=Drosophila melanogaster GN=Arpc2 PE=3 SV=1;sp|Q9VIM5|ARPC2_DROME Actin-related protein 2/3 complex subunit 2 OS=Drosophila melanogaster GN=Arpc2 PE=2 SV=2	2	10	10	35.104	301	46.071	24.6	41.5	41.5	24246000	179320000	379510000
O15971	tr|O15971|O15971_DROME LD39986p OS=Drosophila melanogaster GN=Rab10 PE=1 SV=1	1	5	4	23.336	204	24.515	19.6	25.5	25.5	24106000	62178000	132910000
Q7KNF3;Q8IHC2;A1Z6L9;Q8MSU6	tr|Q7KNF3|Q7KNF3_DROME Hsp90-related protein TRAP1 OS=Drosophila melanogaster GN=Trap1 PE=2 SV=1;tr|Q8IHC2|Q8IHC2_DROME AT15050p OS=Drosophila melanogaster GN=Trap1 PE=2 SV=1;tr|A1Z6L9|A1Z6L9_DROME FI21274p1 OS=Drosophila melanogaster GN=Trap1 PE=1 SV=1	4	7	7	77.417	686	18.651	5.1	11.8	7.6	24087000	64603000	77590000
Q9U5D5;O18333	tr|Q9U5D5|Q9U5D5_DROME Drab2 OS=Drosophila melanogaster GN=Rab2 PE=2 SV=1;tr|O18333|O18333_DROME GH01619p OS=Drosophila melanogaster GN=Rab2 PE=1 SV=1	2	5	5	23.537	213	31.274	26.3	26.8	20.2	24055000	69574000	125860000
A1Z9I5;Q8MRH0;Q9N9Z9	tr|A1Z9I5|A1Z9I5_DROME FI24033p1 OS=Drosophila melanogaster GN=tum PE=1 SV=1;tr|Q8MRH0|Q8MRH0_DROME RE37229p OS=Drosophila melanogaster GN=tum PE=2 SV=1;tr|Q9N9Z9|Q9N9Z9_DROME AcGAP protein OS=Drosophila melanogaster GN=tum PE=2 SV=1	3	6	6	69.762	625	51.002	15.2	6.6	10.6	24026000	20838000	93843000
O62602;Q9U983	tr|O62602|O62602_DROME Licorne OS=Drosophila melanogaster GN=lic PE=1 SV=1;tr|Q9U983|Q9U983_DROME MAPKK OS=Drosophila melanogaster GN=lic PE=2 SV=1	2	6	6	38.195	334	32.04	23.7	15	23.7	23896000	28763000	151390000
Q9V3U6	tr|Q9V3U6|Q9V3U6_DROME 26-29kD-proteinase OS=Drosophila melanogaster GN=26-29-p PE=1 SV=1	1	6	6	62.129	549	24.206	12.2	13.3	12.6	23852000	85895000	109240000
Q9V3P3	tr|Q9V3P3|Q9V3P3_DROME LD45860p OS=Drosophila melanogaster GN=REG PE=1 SV=1	1	5	5	28.121	245	14.789	24.1	24.1	24.1	23824000	97371000	123140000
Q94883;Q86NK7;O96083	tr|Q94883|Q94883_DROME DNA replication-related element factor, isoform A OS=Drosophila melanogaster GN=Dref PE=1 SV=2;tr|Q86NK7|Q86NK7_DROME LD24482p OS=Drosophila melanogaster GN=Dref PE=2 SV=1;tr|O96083|O96083_DROME DREF transcription factor OS=Drosophil	3	7	7	80.726	709	22.84	10.2	2.1	11.7	23642000	11080000	144850000
F6J1F4;Q9W3M8;F6J1F7	tr|F6J1F4|F6J1F4_DROME CG1515 (Fragment) OS=Drosophila melanogaster GN=CG1515 PE=3 SV=1;tr|Q9W3M8|Q9W3M8_DROME LD34211p OS=Drosophila melanogaster GN=Ykt6 PE=1 SV=1;tr|F6J1F7|F6J1F7_DROME CG1515 (Fragment) OS=Drosophila melanogaster GN=CG1515 PE=3 SV=1	3	4	4	21.877	194	52.103	26.3	13.4	10.8	23597000	30019000	40117000
Q9VP46;M9PIF1	tr|Q9VP46|Q9VP46_DROME CG7324, isoform A OS=Drosophila melanogaster GN=Dmel\CG7324 PE=1 SV=1;tr|M9PIF1|M9PIF1_DROME CG7324, isoform B OS=Drosophila melanogaster GN=Q9VP46 PE=1 SV=1	2	13	13	147.26	1291	50.607	8.6	3.5	10.1	23525000	12657000	181920000
Q9VNF9;Q7K107	tr|Q9VNF9|Q9VNF9_DROME Ethanol sensitive with low memory, isoform A OS=Drosophila melanogaster GN=elm PE=1 SV=1;tr|Q7K107|Q7K107_DROME LD19356p (Fragment) OS=Drosophila melanogaster GN=elm PE=2 SV=1	2	3	3	21.996	189	122.99	21.2	6.3	21.2	23499000	16622000	64044000
Q7KVL7;Q9W277;Q6AWP5;Q95RP4	tr|Q7KVL7|Q7KVL7_DROME Vacuolar protein sorting-associated protein 35 OS=Drosophila melanogaster GN=Vps35 PE=1 SV=2;tr|Q9W277|Q9W277_DROME Vacuolar protein sorting-associated protein 35 OS=Drosophila melanogaster GN=Vps35 PE=1 SV=4;tr|Q6AWP5|Q6AWP5_DROME R	4	8	8	91.13	803	19.127	9.1	10.3	8.5	23465000	63076000	87523000
Q9VAC4	tr|Q9VAC4|Q9VAC4_DROME GEO09167p1 OS=Drosophila melanogaster GN=Nph PE=1 SV=1	1	8	8	17.369	156	140.7	19.2	44.9	66	23421000	192850000	367310000
X2J8L3;P12426	tr|X2J8L3|X2J8L3_DROME Adenine phosphoribosyltransferase, isoform C OS=Drosophila melanogaster GN=Aprt PE=3 SV=1;sp|P12426|APT_DROME Adenine phosphoribosyltransferase OS=Drosophila melanogaster GN=Aprt PE=2 SV=3	2	5	5	19.69	182	16.164	25.3	34.6	34.6	23374000	56646000	117100000
Q9W5W8	tr|Q9W5W8|Q9W5W8_DROME CG9577 OS=Drosophila melanogaster GN=Dmel\CG9577 PE=1 SV=2	1	5	5	33.818	312	39.779	27.9	23.7	23.7	23325000	44239000	303620000
Q9VD58	tr|Q9VD58|Q9VD58_DROME CG6439, isoform A OS=Drosophila melanogaster GN=Idh3b PE=1 SV=1	1	9	9	40.381	370	50.196	18.9	36.5	30	23306000	136600000	222520000
O62528;Q9VZF5;Q8SXT9;O16048	tr|O62528|O62528_DROME Kinesin-like protein OS=Drosophila melanogaster GN=pav PE=2 SV=1;tr|Q9VZF5|Q9VZF5_DROME Kinesin-like protein OS=Drosophila melanogaster GN=pav PE=1 SV=1;tr|Q8SXT9|Q8SXT9_DROME Kinesin-like protein OS=Drosophila melanogaster GN=pav PE	4	4	4	100.54	886	56.568	8.1	1.9	8.1	23102000	0	105310000
F0JAP3;Q9Y0Y2	tr|F0JAP3|F0JAP3_DROME Adenylosuccinate synthetase OS=Drosophila melanogaster GN=CG17273-RA PE=2 SV=1;sp|Q9Y0Y2|PURA_DROME Adenylosuccinate synthetase OS=Drosophila melanogaster GN=AdSS PE=2 SV=1	2	4	4	51.052	466	10.963	12.2	12.2	5.4	22834000	43937000	13622000
Q9U4Y0;Q9U4Y1;Q0KI98	tr|Q9U4Y0|Q9U4Y0_DROME Tryptophanyl-tRNA synthetase (Fragment) OS=Drosophila melanogaster GN=TrpRS PE=2 SV=1;tr|Q9U4Y1|Q9U4Y1_DROME AT21437p OS=Drosophila melanogaster GN=TrpRS PE=2 SV=1;tr|Q0KI98|Q0KI98_DROME FI06027p OS=Drosophila melanogaster GN=TrpRS P	3	7	7	46.974	420	32.922	12.6	23.3	21.4	22777000	106260000	135650000
Q7K1U0	tr|Q7K1U0|Q7K1U0_DROME Activity-regulated cytoskeleton associated protein 1 OS=Drosophila melanogaster GN=Arc1 PE=1 SV=1	1	6	6	28.877	254	53.713	24.4	31.1	31.1	22742000	105750000	114890000
Q4QQB9	tr|Q4QQB9|Q4QQB9_DROME LP21121p OS=Drosophila melanogaster GN=CG15098 PE=1 SV=1	1	2	2	20.65	186	16.458	12.4	12.4	12.4	22626000	339580000	135480000
Q9W3N6;A9YJR6;A9YJR4	sp|Q9W3N6|USO1_DROME General vesicular transport factor p115 OS=Drosophila melanogaster GN=p115 PE=1 SV=2	3	10	10	92.068	836	51.481	12.4	11.5	11.6	22556000	49731000	97450000
Q9V3E7	tr|Q9V3E7|Q9V3E7_DROME LD24793p OS=Drosophila melanogaster GN=Ref1 PE=1 SV=1	1	6	6	27.851	266	37.581	13.9	18	21.8	22405000	46342000	294510000
Q9VW09	sp|Q9VW09|LTN1_DROME E3 ubiquitin-protein ligase listerin OS=Drosophila melanogaster GN=l(3)76BDr PE=1 SV=2	1	13	13	198.64	1747	51.366	6.4	7.3	8.6	22339000	62857000	124880000
U3PXB4;Q9VF87;B7FNQ8	tr|U3PXB4|U3PXB4_DROME FI23909p1 (Fragment) OS=Drosophila melanogaster GN=Sra-1-RA PE=2 SV=1;sp|Q9VF87|CYFIP_DROME Cytoplasmic FMR1-interacting protein OS=Drosophila melanogaster GN=Sra-1 PE=1 SV=1	3	9	9	151.92	1314	24.806	6.1	5.4	7.8	22274000	31844000	122730000
Q9VDT1	tr|Q9VDT1|Q9VDT1_DROME Arc42 OS=Drosophila melanogaster GN=Arc42 PE=1 SV=1	1	5	5	43.654	405	16.735	12.6	12.8	9.9	22229000	65642000	47709000
G3KKP7;Q9VSA3	tr|G3KKP7|G3KKP7_DROME CG12262-PA OS=Drosophila melanogaster GN=CG12262 PE=3 SV=1;sp|Q9VSA3|ACADM_DROME Probable medium-chain specific acyl-CoA dehydrogenase, mitochondrial OS=Drosophila melanogaster GN=CG12262 PE=2 SV=1	2	8	8	45.871	419	25.79	16.5	18.4	24.1	22219000	84173000	216320000
P04146	sp|P04146|COPIA_DROME Copia protein OS=Drosophila melanogaster GN=GIP PE=1 SV=3	1	6	6	162.82	1409	33.733	3.6	4.3	4.3	22209000	299510000	271520000
Q9VKW3	tr|Q9VKW3|Q9VKW3_DROME Replication factor C subunit 3 OS=Drosophila melanogaster GN=RfC3 PE=1 SV=2	1	4	4	37.407	332	22.964	13.9	13.9	13.9	21904000	49851000	74763000
A0A0B4KED0;Q9W5N2	tr|A0A0B4KED0|A0A0B4KED0_DROME GEO09618p1 OS=Drosophila melanogaster GN=RpL38 PE=2 SV=1;sp|Q9W5N2|RL38_DROME 60S ribosomal protein L38 OS=Drosophila melanogaster GN=RpL38 PE=1 SV=1	2	4	4	8.1996	70	17.656	28.6	42.9	42.9	21588000	155640000	368860000
Q8IRK7;Q7KVN1;Q8IHC7;Q8IHH2;Q9I7V7;Q9I7V6;Q8IHG2;Q8T0V2;Q8IGI1;Q9GU50;Q8IH54;Q9GU49	tr|Q8IRK7|Q8IRK7_DROME Misexpression suppressor of KSR 2, isoform D OS=Drosophila melanogaster GN=MESK2 PE=1 SV=2;tr|Q7KVN1|Q7KVN1_DROME Misexpression suppressor of KSR 2, isoform K OS=Drosophila melanogaster GN=MESK2 PE=1 SV=1;tr|Q8IHC7|Q8IHC7_DROME AT140	12	3	3	40.22	365	6.7383	11	11	3.8	21488000	34331000	30317000
M9MRM4;Q9W0I6	tr|M9MRM4|M9MRM4_DROME Sac1 phosphatase, isoform B OS=Drosophila melanogaster GN=Sac1 PE=4 SV=1;sp|Q9W0I6|SAC1_DROME Phosphatidylinositide phosphatase SAC1 OS=Drosophila melanogaster GN=Sac1 PE=2 SV=1	2	11	11	67.767	592	39.453	15.7	14	20.3	21342000	100520000	216140000
Q9W0M4	tr|Q9W0M4|Q9W0M4_DROME LP10861p OS=Drosophila melanogaster GN=Dmel\CG13887 PE=1 SV=1	1	5	5	26.154	228	28.38	6.6	18	18	21316000	95765000	69268000
Q9VBS8	tr|Q9VBS8|Q9VBS8_DROME IP10876p OS=Drosophila melanogaster GN=Dmel\CG31370 PE=1 SV=3	1	4	4	46.342	396	11.356	12.9	6.6	8.6	21179000	58873000	35892000
Q9VUQ5;M9PFK7;E5KZ94;A0A1B1LJI2;A0A1B1LJP5;A0A1B1LJA1;A0A1B1LJG5;A0A1B1LJJ5;A0A1B1LJE0;A0A1B1LJP6;A0A1B1LJQ7;A0A1B1LK33;A0A1B1LJY8;A0A1B1LJR0;A0A1B1LJQ6;A0A1B1LJM7;A0A1B1LJK8;A0A1B1LJE2;A0A1B1LJD3;A0A1B1LJB7;A0A1B1LJT0;A0A1B1LJF9;A0A1B1LJK6;A0A1B1LK05;A0A1B1LJR4;A0A1B1LJ88;A0A1B1LJY6;A0A1B1LJJ3;A0A1B1LJL8;A0A1B1LJM6;A0A1B1LJA5;A0A1B1LJN2	sp|Q9VUQ5|AGO2_DROME Protein argonaute-2 OS=Drosophila melanogaster GN=AGO2 PE=1 SV=3;tr|M9PFK7|M9PFK7_DROME Argonaute 2, isoform E OS=Drosophila melanogaster GN=AGO2 PE=1 SV=1;tr|E5KZ94|E5KZ94_DROME AGO2 (Fragment) OS=Drosophila melanogaster PE=3 SV=1	32	12	12	136.85	1214	40.08	7.8	7.3	15.5	21002000	45270000	151540000
Q9V3Z4	tr|Q9V3Z4|Q9V3Z4_DROME GH11341p OS=Drosophila melanogaster GN=Rpn5 PE=1 SV=1	1	7	7	57.747	502	25.796	8.4	11.6	10.8	20931000	82473000	179390000
Q7K012	tr|Q7K012|Q7K012_DROME Brahma associated protein 55kD OS=Drosophila melanogaster GN=Bap55 PE=1 SV=1	1	7	7	47.319	425	43.738	24.9	22.6	31.8	20900000	66305000	182440000
H1UUB1;P18489	tr|H1UUB1|H1UUB1_DROME GEO12465p1 OS=Drosophila melanogaster GN=Syb PE=1 SV=1;sp|P18489|SYB_DROME Synaptobrevin OS=Drosophila melanogaster GN=Syb PE=2 SV=3	2	2	2	14.079	129	75.918	18.6	13.2	13.2	20872000	13614000	22770000
E1JIT6;G7H820;G2J627;A8E6P6;Q9VCZ3	tr|E1JIT6|E1JIT6_DROME Octopamine beta1 receptor, isoform C OS=Drosophila melanogaster GN=Octbeta1R PE=3 SV=1;tr|G7H820|G7H820_DROME IP09384p1 (Fragment) OS=Drosophila melanogaster GN=oa2-RC PE=2 SV=1;tr|G2J627|G2J627_DROME RH07250p1 (Fragment) OS=Drosophi	5	1	1	47.865	428	-2	2.3	2.3	2.3	20867000	156210000	122320000
Q5U156;A0A0B4KER0;Q95RL2;Q960P7	tr|Q5U156|Q5U156_DROME RE01954p OS=Drosophila melanogaster GN=row PE=1 SV=1;tr|A0A0B4KER0|A0A0B4KER0_DROME Relative of woc, isoform C OS=Drosophila melanogaster GN=row PE=1 SV=1;tr|Q95RL2|Q95RL2_DROME LD21608p OS=Drosophila melanogaster GN=row PE=1 SV=1	4	12	12	143.68	1281	28.122	8.2	6.2	7.7	20791000	44536000	130620000
Q9VJ86;Q95NR4	tr|Q9VJ86|Q9VJ86_DROME Bicoid stability factor OS=Drosophila melanogaster GN=bsf PE=1 SV=2;tr|Q95NR4|Q95NR4_DROME Bicoid mRNA stability factor OS=Drosophila melanogaster GN=bsf PE=2 SV=1	2	9	9	157.26	1412	22.791	10	5.9	10	20545000	15515000	149530000
Q9VAW3	tr|Q9VAW3|Q9VAW3_DROME GH12731p OS=Drosophila melanogaster GN=Gfat2 PE=1 SV=1	1	12	12	76.538	683	63.673	6.6	15.4	17.6	20534000	126550000	492520000
A0A0C4DHE6;Q9VFS5;Q8MSW1	tr|A0A0C4DHE6|A0A0C4DHE6_DROME Falafel, isoform E OS=Drosophila melanogaster GN=flfl PE=1 SV=1;sp|Q9VFS5|PP4R3_DROME Serine/threonine-protein phosphatase 4 regulatory subunit 3 OS=Drosophila melanogaster GN=flfl PE=1 SV=4;tr|Q8MSW1|Q8MSW1_DROME LD26904p OS	3	13	13	109.29	980	45.339	11	16.2	15.7	20527000	122210000	193590000
Q7K3V6	tr|Q7K3V6|Q7K3V6_DROME AT01345p OS=Drosophila melanogaster GN=mEFTu2 PE=1 SV=1	1	2	2	49.673	456	3.2364	2	5	2	20500000	87290000	77476000
Q9W3J5	sp|Q9W3J5|SYFA_DROME Phenylalanine--tRNA ligase alpha subunit OS=Drosophila melanogaster GN=alpha-PheRS PE=1 SV=1	1	7	7	55.683	498	21.862	12.7	12.7	12.7	20498000	126760000	333940000
A0A0B4KI24;Q27415	tr|A0A0B4KI24|A0A0B4KI24_DROME Nucleoplasmin, isoform B OS=Drosophila melanogaster GN=Nlp PE=4 SV=1;sp|Q27415|NLP_DROME Nucleoplasmin-like protein OS=Drosophila melanogaster GN=Nlp PE=1 SV=1	2	5	5	16.996	152	14.251	29.6	29.6	36.2	20467000	111790000	152970000
Q9VL18	sp|Q9VL18|EF1D_DROME Probable elongation factor 1-delta OS=Drosophila melanogaster GN=eEF1delta PE=1 SV=1	1	10	10	28.934	256	40.378	16	23.8	44.9	20423000	53567000	318440000
Q24179	sp|Q24179|SLY1_DROME Protein sly1 homolog OS=Drosophila melanogaster GN=Slh PE=2 SV=4	1	10	10	72.365	639	78.952	14.2	11.1	17.5	20194000	52024000	99595000
Q9VVA6	tr|Q9VVA6|Q9VVA6_DROME Nuclear migration protein NudC OS=Drosophila melanogaster GN=nudC PE=1 SV=2	1	6	6	37.792	332	28.997	19	14.2	13.3	20183000	45954000	43395000
P20432	sp|P20432|GSTD1_DROME Glutathione S-transferase D1 OS=Drosophila melanogaster GN=GstD1 PE=1 SV=1	1	4	4	23.866	209	5.5673	22.5	12	12	20164000	32397000	41970000
A4V4A1;Q960Z0	tr|A4V4A1|A4V4A1_DROME Kinesin-like protein OS=Drosophila melanogaster GN=Klp10A PE=1 SV=1;sp|Q960Z0|KI10A_DROME Kinesin-like protein Klp10A OS=Drosophila melanogaster GN=Klp10A PE=1 SV=1	2	10	10	88.671	805	62.505	7.3	8.2	11.4	20099000	35775000	249270000
A1ZB71;Q7JZM3	tr|A1ZB71|A1ZB71_DROME Glutathione S transferase E6 OS=Drosophila melanogaster GN=GstE6 PE=1 SV=1;tr|Q7JZM3|Q7JZM3_DROME RE21095p (Fragment) OS=Drosophila melanogaster GN=GstE6 PE=1 SV=1	2	4	4	25.014	222	9.238	14.4	14.4	20.7	20041000	48893000	117310000
Q9VK85;P91944;M9PD08	tr|Q9VK85|Q9VK85_DROME Ef1alpha-like factor, isoform A OS=Drosophila melanogaster GN=eRF3 PE=1 SV=1;tr|P91944|P91944_DROME Elongation factor 1 alpha-like factor OS=Drosophila melanogaster GN=eRF3 PE=2 SV=1;tr|M9PD08|M9PD08_DROME Ef1alpha-like factor, isofo	3	6	6	66.451	619	15.059	9.7	7.3	11.1	19820000	41047000	108680000
Q8IMU2;A0A0B4KHU4;Q8SWX6	tr|Q8IMU2|Q8IMU2_DROME RE10237p OS=Drosophila melanogaster GN=Dmel\CG11790 PE=1 SV=1;tr|A0A0B4KHU4|A0A0B4KHU4_DROME Uncharacterized protein, isoform C OS=Drosophila melanogaster GN=Dmel\CG11790 PE=1 SV=1;tr|Q8SWX6|Q8SWX6_DROME GH08893p OS=Drosophila melano	3	4	4	27.135	245	17.693	26.5	26.5	26.5	19734000	72213000	91505000
P56538	sp|P56538|IF6_DROME Eukaryotic translation initiation factor 6 OS=Drosophila melanogaster GN=eIF6 PE=2 SV=3	1	3	3	26.494	245	25.588	22.9	17.1	22.9	19681000	37343000	70444000
Q9VUB9;Q8IGM3	tr|Q9VUB9|Q9VUB9_DROME CG6650, isoform A OS=Drosophila melanogaster GN=anon-WO0172774.121 PE=1 SV=1;tr|Q8IGM3|Q8IGM3_DROME RE65359p OS=Drosophila melanogaster GN=CG6650 PE=2 SV=1	2	8	8	56.148	501	93.446	13.6	23	19.4	19675000	106970000	149810000
Q9U9Q1;Q7KLW6	tr|Q9U9Q1|Q9U9Q1_DROME Replication factor C 38kD subunit, isoform A OS=Drosophila melanogaster GN=RfC38 PE=1 SV=1;tr|Q7KLW6|Q7KLW6_DROME LD06837p (Fragment) OS=Drosophila melanogaster GN=RfC38 PE=2 SV=1	2	7	7	40.815	356	43.425	19.1	23.9	28.4	19606000	96076000	166870000
Q9W3K3	tr|Q9W3K3|Q9W3K3_DROME CG2260 OS=Drosophila melanogaster GN=Dmel\CG2260 PE=1 SV=1	1	2	2	68.86	609	2.1548	1.8	1.8	3.6	19548000	138480000	339490000
X2J5P7;Q9VKG0	tr|X2J5P7|X2J5P7_DROME CG6614, isoform B OS=Drosophila melanogaster GN=Dmel\CG6614 PE=4 SV=1;tr|Q9VKG0|Q9VKG0_DROME CG6614, isoform A OS=Drosophila melanogaster GN=Dmel\CG6614 PE=2 SV=4	2	1	1	82.562	704	-2	2.7	2.7	2.7	19535000	65222000	127820000
Q9W3J4	tr|Q9W3J4|Q9W3J4_DROME CG2129 OS=Drosophila melanogaster GN=Dmel\CG2129 PE=2 SV=1	1	6	6	53.308	465	32.282	15.3	13.3	12.9	19431000	43229000	126860000
P40797	sp|P40797|PNUT_DROME Protein peanut OS=Drosophila melanogaster GN=pnut PE=1 SV=2	1	10	10	60.143	539	77.265	12.1	15.2	18.9	19394000	98083000	233050000
O46067	tr|O46067|O46067_DROME CG2918, isoform A OS=Drosophila melanogaster GN=CT9894 PE=1 SV=1	1	7	7	103.44	923	29.034	8.3	6.6	10	19348000	21531000	37981000
X2JDP6;M9MRG2;Q8T079	tr|X2JDP6|X2JDP6_DROME CG4747, isoform C OS=Drosophila melanogaster GN=BEST:GH19401 PE=4 SV=1;tr|M9MRG2|M9MRG2_DROME CG4747, isoform B OS=Drosophila melanogaster GN=BEST:GH19401 PE=4 SV=1;sp|Q8T079|GLYR1_DROME Putative oxidoreductase GLYR1 homolog OS=Droso	3	9	9	65.251	602	143.05	8.6	15	14.1	19237000	230410000	176870000
Q4QQ70	tr|Q4QQ70|Q4QQ70_DROME IP09819p OS=Drosophila melanogaster GN=Dmel\CG15602 PE=1 SV=1	1	4	4	38.608	342	113.5	21.6	9.6	19	19032000	16381000	159190000
P40320;C8VV92;A4UZW2;D5SHQ7;E4NKH6;M9PAY2	sp|P40320|METK_DROME S-adenosylmethionine synthase OS=Drosophila melanogaster GN=Sam-S PE=2 SV=2;tr|C8VV92|C8VV92_DROME S-adenosylmethionine synthase OS=Drosophila melanogaster GN=M(2)21AB-RG PE=2 SV=1;tr|A4UZW2|A4UZW2_DROME S-adenosylmethionine synthase O	6	7	7	44.696	408	54.228	16.4	18.1	21.1	18953000	56571000	178590000
M9PG40;Q8SYG3;M9PDD4	tr|M9PG40|M9PG40_DROME Uncharacterized protein, isoform D OS=Drosophila melanogaster GN=BcDNA:RE63412 PE=1 SV=1;tr|Q8SYG3|Q8SYG3_DROME RE63412p OS=Drosophila melanogaster GN=BcDNA:RE63412 PE=1 SV=1;tr|M9PDD4|M9PDD4_DROME Uncharacterized protein, isoform C	3	4	3	19.203	167	24.154	32.3	13.2	28.1	18827000	21287000	221170000
Q9VBU6	tr|Q9VBU6|Q9VBU6_DROME Protein RER1 OS=Drosophila melanogaster GN=Dmel\CG11857 PE=1 SV=1	1	5	1	23.721	203	19.239	33	33	33	18809000	34225000	34419000
A4V4I0;P26308	tr|A4V4I0|A4V4I0_DROME G protein beta-subunit 13F, isoform C OS=Drosophila melanogaster GN=Gbeta13F PE=1 SV=1;sp|P26308|GBB1_DROME Guanine nucleotide-binding protein subunit beta-1 OS=Drosophila melanogaster GN=Gbeta13F PE=1 SV=1	2	3	3	37.133	340	3.1196	10.6	10.6	10.6	18593000	15584000	66461000
Q7KMP8;Q29QY1	tr|Q7KMP8|Q7KMP8_DROME 26S proteasome regulatory complex subunit p39A OS=Drosophila melanogaster GN=Rpn9 PE=1 SV=1	2	8	8	43.766	382	40.41	14.4	23	23	18549000	237030000	409160000
I1V510;Q9VK34;D3PFE9;Q86LE9	tr|I1V510|I1V510_DROME Sir2 OS=Drosophila melanogaster GN=Sir2 PE=4 SV=1;sp|Q9VK34|SIR2_DROME NAD-dependent histone deacetylase Sir2 OS=Drosophila melanogaster GN=Sir2 PE=1 SV=1;tr|D3PFE9|D3PFE9_DROME RE01731p OS=Drosophila melanogaster GN=Sir2-RA PE=2 SV=	4	10	10	91.501	823	32.497	10.2	1.3	15.1	18478000	11463000	229730000
Q960Y8;Q9VEH0;Q95R41	tr|Q960Y8|Q960Y8_DROME Aluminum tubes, isoform G OS=Drosophila melanogaster GN=alt PE=1 SV=1;tr|Q9VEH0|Q9VEH0_DROME Aluminum tubes, isoform A OS=Drosophila melanogaster GN=alt PE=1 SV=1;tr|Q95R41|Q95R41_DROME SD10611p OS=Drosophila melanogaster GN=alt PE=2	3	15	15	98.592	874	204.59	7.6	5.4	25.1	18352000	19898000	418270000
Q9XYU0;Q8T025	sp|Q9XYU0|MCM7_DROME DNA replication licensing factor Mcm7 OS=Drosophila melanogaster GN=Mcm7 PE=1 SV=1;tr|Q8T025|Q8T025_DROME LD37855p OS=Drosophila melanogaster GN=Mcm7 PE=2 SV=1	2	12	12	81.283	720	46.775	11.1	16.9	20.6	18305000	92378000	240270000
A0A0B4KHS7;A0A0B4KGI7;A0A0B4KGE1;Q24151;A0A0B4KHS6;A0A0B4KH10;D2NUE7	tr|A0A0B4KHS7|A0A0B4KHS7_DROME Signal transducer and activator of transcription OS=Drosophila melanogaster GN=Stat92E PE=3 SV=1;tr|A0A0B4KGI7|A0A0B4KGI7_DROME Signal transducer and activator of transcription OS=Drosophila melanogaster GN=Stat92E PE=3 SV=1;	7	7	7	86.414	761	20.181	7.2	8.9	11.6	18292000	43625000	179440000
Q9VQ29;H9XQA8	tr|Q9VQ29|Q9VQ29_DROME Cytochrome b-c1 complex subunit Rieske, mitochondrial OS=Drosophila melanogaster GN=RFeSP PE=1 SV=3	2	3	3	24.872	230	11.349	21.3	21.3	21.3	18184000	26115000	115000000
X2J4N6;Q9VMQ7	tr|X2J4N6|X2J4N6_DROME CG6907, isoform B OS=Drosophila melanogaster GN=Dmel\CG6907 PE=4 SV=1;sp|Q9VMQ7|ELP4_DROME Putative elongator complex protein 4 OS=Drosophila melanogaster GN=CG6907 PE=1 SV=1	2	8	8	48.712	437	43.668	12.1	23.8	29.5	18150000	85813000	251730000
B7Z0Z1;Q9VXG1;A2VEG0	tr|B7Z0Z1|B7Z0Z1_DROME Hangover, isoform C OS=Drosophila melanogaster GN=hang PE=1 SV=1;sp|Q9VXG1|HANG_DROME Zinc finger protein hangover OS=Drosophila melanogaster GN=hang PE=1 SV=4	3	6	6	242.32	2223	20.987	5.8	0	0.8	18094000	0	0
E1JHA4;P48809;L0CQ56;L0CRN5;L0CRY8;L0CRY2;L0CQ61;L0CRN0;L0CR94;L0CPX5	tr|E1JHA4|E1JHA4_DROME Heterogeneous nuclear ribonucleoprotein at 27C, isoform D OS=Drosophila melanogaster GN=Hrb27C PE=1 SV=1;sp|P48809|RB27C_DROME Heterogeneous nuclear ribonucleoprotein 27C OS=Drosophila melanogaster GN=Hrb27C PE=1 SV=2;tr|L0CQ56|L0CQ5	10	4	4	44.769	421	69.312	15.7	10.2	20.2	17805000	54235000	221060000
A0A023GQA5;P24156	tr|A0A023GQA5|A0A023GQA5_DROME Lethal (2) 37Cc, isoform D OS=Drosophila melanogaster GN=l(2)37Cc PE=1 SV=1;sp|P24156|L2CC_DROME Protein l(2)37Cc OS=Drosophila melanogaster GN=l(2)37Cc PE=2 SV=2	2	4	4	30.383	276	8.9166	19.9	8	8	17760000	10388000	26059000
Q9VPX7;Q7KN55;Q9VPX6	tr|Q9VPX7|Q9VPX7_DROME Adenylyl cyclase-associated protein OS=Drosophila melanogaster GN=capt PE=1 SV=2;tr|Q7KN55|Q7KN55_DROME Adenylyl cyclase-associated protein (Fragment) OS=Drosophila melanogaster GN=capt PE=2 SV=1;tr|Q9VPX6|Q9VPX6_DROME Adenylyl cycla	3	6	6	45.604	424	21.466	24.3	21.5	9.7	17610000	36625000	2071200
A0A0B4JD48;C6SV44;Q95029	tr|A0A0B4JD48|A0A0B4JD48_DROME Cysteine proteinase-1, isoform D OS=Drosophila melanogaster GN=Cp1 PE=1 SV=1;tr|C6SV44|C6SV44_DROME RE21773p (Fragment) OS=Drosophila melanogaster GN=Cp1-RC PE=2 SV=1;sp|Q95029|CATL_DROME Cathepsin L OS=Drosophila melanogaste	3	9	9	27.041	249	44.717	22.1	18.1	38.2	17594000	22445000	172550000
Q9V9R2	tr|Q9V9R2|Q9V9R2_DROME Cullin 2, isoform A OS=Drosophila melanogaster GN=Cul2 PE=1 SV=3	1	5	5	87.372	753	20.257	7.8	5.8	7.8	17573000	17110000	107500000
E8NH77;E6PBX0;X2JLF7;A4V4T4;F2FB48;Q24246;F0JAG7;X2JCQ7;Q7KWG3;T2FGB0;E6PBX8;B5RJJ8;E8NH86;M9NE47;X2JCR4;Q9W5W4;O96509;Q8IRZ3;Q5BHW5;Q8MSA9;Q7KPH5	tr|E8NH77|E8NH77_DROME SD15168p OS=Drosophila melanogaster GN=sw PE=1 SV=1;tr|E6PBX0|E6PBX0_DROME LD30375p OS=Drosophila melanogaster GN=sw-RJ PE=2 SV=1;tr|X2JLF7|X2JLF7_DROME Short wing, isoform O OS=Drosophila melanogaster GN=sw PE=1 SV=1;tr|A4V4T4|A4V4T	21	5	5	70.249	634	41.767	9.5	7.9	9.8	17566000	17179000	90725000
Q7K5K3;Q8IGJ4;Q8IML6	tr|Q7K5K3|Q7K5K3_DROME Pyruvate dehydrogenase E1 component subunit beta OS=Drosophila melanogaster GN=CG 11876 PE=1 SV=1;tr|Q8IGJ4|Q8IGJ4_DROME Pyruvate dehydrogenase E1 component subunit beta OS=Drosophila melanogaster GN=CG11876 PE=2 SV=1	3	8	8	39.351	365	52.253	11	21.1	25.5	17485000	63483000	88582000
Q86MQ6	tr|Q86MQ6|Q86MQ6_DROME HL01663p OS=Drosophila melanogaster PE=2 SV=1	1	1	1	10.972	95	-2	7.4	0	0	17395000	0	0
Q2XYI2;Q9VPX5	tr|Q2XYI2|Q2XYI2_DROME Vacuolar protein sorting-associated protein 29 (Fragment) OS=Drosophila melanogaster GN=Vps29 PE=3 SV=1;tr|Q9VPX5|Q9VPX5_DROME Vacuolar protein sorting-associated protein 29 OS=Drosophila melanogaster GN=Vps29 PE=1 SV=1	2	3	3	18.972	169	14.861	12.4	18.3	18.3	17376000	29996000	120770000
Q9VWQ7;Q8IQX5;Q8MQZ6;B5RJ68	tr|Q9VWQ7|Q9VWQ7_DROME CG6891, isoform A OS=Drosophila melanogaster GN=Dmel\CG6891 PE=1 SV=1;tr|Q8IQX5|Q8IQX5_DROME CG6891, isoform B OS=Drosophila melanogaster GN=Dmel\CG6891 PE=1 SV=1;tr|Q8MQZ6|Q8MQZ6_DROME LP08941p (Fragment) OS=Drosophila melanogaster	4	3	3	18.56	163	26.72	23.9	23.9	23.9	17282000	23336000	11927000
A0A1B2AJH4;O44437	tr|A0A1B2AJH4|A0A1B2AJH4_DROME GEO01109p1 (Fragment) OS=Drosophila melanogaster PE=2 SV=1;sp|O44437|SMD3_DROME Small nuclear ribonucleoprotein Sm D3 OS=Drosophila melanogaster GN=SmD3 PE=1 SV=1	2	3	3	15.582	151	8.5124	17.2	17.2	17.2	17263000	61937000	124560000
Q9VYD5	tr|Q9VYD5|Q9VYD5_DROME Branched-chain-amino-acid aminotransferase OS=Drosophila melanogaster GN=Dmel\CG1673 PE=1 SV=2	1	3	3	49.536	443	15.018	11.1	11.1	7	17142000	34990000	66085000
E1JIZ9;Q1ECA2	tr|E1JIZ9|E1JIZ9_DROME Trivet, isoform I OS=Drosophila melanogaster GN=trv PE=4 SV=2;tr|Q1ECA2|Q1ECA2_DROME IP09238p (Fragment) OS=Drosophila melanogaster PE=2 SV=1	2	1	1	69.811	651	1.9219	2	2	2	16962000	17948000	47554000
A0A0B4K7Z5;Q7KLV9	tr|A0A0B4K7Z5|A0A0B4K7Z5_DROME Regulatory particle non-ATPase 6, isoform C OS=Drosophila melanogaster GN=Rpn6 PE=1 SV=1;sp|Q7KLV9|PSD11_DROME 26S proteasome non-ATPase regulatory subunit 11 OS=Drosophila melanogaster GN=Rpn6 PE=1 SV=1	2	8	8	47.263	422	35.403	11.1	19.2	19.2	16823000	101200000	226710000
M9NG39;P41073;D5AEL0;C0PTV1	tr|M9NG39|M9NG39_DROME Protein on ecdysone puffs, isoform D OS=Drosophila melanogaster GN=Pep PE=1 SV=1;sp|P41073|PEP_DROME Zinc finger protein on ecdysone puffs OS=Drosophila melanogaster GN=Pep PE=1 SV=1;tr|D5AEL0|D5AEL0_DROME RE25356p OS=Drosophila mela	4	13	13	75.598	693	64.472	8.2	23.2	14.9	16809000	559100000	432590000
Q960T8;X2JAE9;Q8MT77;Q8T9B4;F2FB92;Q9VIG9;Q7YU06;Q7KT22;Q9VJ21;Q9VLN6;B3DN70;Q9VDT3;A0A0B4KEG2;A0A0B4KGI0;P91660	tr|Q960T8|Q960T8_DROME LD35689p OS=Drosophila melanogaster GN=CG17338 PE=2 SV=1;tr|X2JAE9|X2JAE9_DROME Uncharacterized protein, isoform C OS=Drosophila melanogaster GN=Dmel\CG31793 PE=4 SV=1;tr|Q8MT77|Q8MT77_DROME LD28489p OS=Drosophila melanogaster GN=CG1	15	4	3	119.89	1074	20.24	7.3	0.8	2.2	16707000	0	19080000
P49735	sp|P49735|MCM2_DROME DNA replication licensing factor Mcm2 OS=Drosophila melanogaster GN=Mcm2 PE=1 SV=1	1	8	8	100.41	887	50.286	8.1	8.9	12.2	16681000	61092000	85685000
Q9VSI1	tr|Q9VSI1|Q9VSI1_DROME CG7182, isoform A OS=Drosophila melanogaster GN=Dmel\CG7182 PE=1 SV=2	1	7	7	56.818	513	27.813	17.7	16.2	21.6	16612000	51026000	129610000
M9PD65;M9PBD9;A0A0E3X848;Q9VIW3;A0A0E3T5D4;A0A0E3T4A9;A0A0E3T479;A0A0E3T462;C0LA70;C0LA69;C0LA78;C0LA68;A0A0E3T5D1;A0A0E3T458	tr|M9PD65|M9PD65_DROME Ran GTPase activating protein, isoform C OS=Drosophila melanogaster GN=RanGAP PE=1 SV=1;tr|M9PBD9|M9PBD9_DROME Ran GTPase activating protein, isoform B OS=Drosophila melanogaster GN=RanGAP PE=1 SV=1;tr|A0A0E3X848|A0A0E3X848_DROME Ran	14	10	10	65.183	588	83.365	12.6	6.1	23	16519000	17076000	201290000
Q9VN86	tr|Q9VN86|Q9VN86_DROME AT14148p OS=Drosophila melanogaster GN=CT40966 PE=1 SV=1	1	6	6	47.256	430	36.193	19.1	10.9	18.4	16515000	31188000	44158000
Q9VQD8	tr|Q9VQD8|Q9VQD8_DROME Actin-related protein 2/3 complex subunit 5 OS=Drosophila melanogaster GN=Arpc5 PE=1 SV=1	1	2	2	16.669	151	10.509	35.1	9.9	9.9	16487000	19547000	26128000
A0A0B4LGS4;P54611	tr|A0A0B4LGS4|A0A0B4LGS4_DROME Vacuolar H[+]-ATPase 26kD subunit, isoform C OS=Drosophila melanogaster GN=Vha26 PE=3 SV=1;sp|P54611|VATE_DROME V-type proton ATPase subunit E OS=Drosophila melanogaster GN=Vha26 PE=2 SV=1	2	5	5	26.082	226	9.848	15.5	19.9	16.8	16463000	64244000	49709000
M9ND19;Q9W0P5;Q8MZ78	tr|M9ND19|M9ND19_DROME UDP-galactose 4-epimerase, isoform B OS=Drosophila melanogaster GN=Gale PE=1 SV=1;sp|Q9W0P5|GALE_DROME UDP-glucose 4-epimerase OS=Drosophila melanogaster GN=Gale PE=1 SV=1;tr|Q8MZ78|Q8MZ78_DROME AT27946p OS=Drosophila melanogaster G	3	7	7	38.696	350	41.652	20.3	24.9	27.1	16363000	108920000	463970000
M9PH19;Q9W002;Q6NP15;Q7KV89;Q7KV88;Q7KV90;M9PBJ7;Q7M3J7	tr|M9PH19|M9PH19_DROME Misshapen, isoform F OS=Drosophila melanogaster GN=msn PE=1 SV=1;tr|Q9W002|Q9W002_DROME Misshapen, isoform A OS=Drosophila melanogaster GN=msn PE=1 SV=3;tr|Q6NP15|Q6NP15_DROME LD16337p (Fragment) OS=Drosophila melanogaster GN=msn PE=	8	7	7	152.55	1404	42.127	5.1	5.3	8.1	16192000	44748000	93356000
Q9VHC7;A0A0B4K6Z1;Q8MSI9	tr|Q9VHC7|Q9VHC7_DROME FI21236p1 OS=Drosophila melanogaster GN=rump PE=1 SV=1;tr|A0A0B4K6Z1|A0A0B4K6Z1_DROME Rumpelstiltskin, isoform B OS=Drosophila melanogaster GN=rump PE=1 SV=1;tr|Q8MSI9|Q8MSI9_DROME GH11495p OS=Drosophila melanogaster GN=rump PE=2 SV=	3	10	10	66.73	632	76.262	8.9	17.6	19.1	15997000	515810000	424000000
C0MJE4;Q24572;E1JIL4	tr|C0MJE4|C0MJE4_DROME CG4236-PA OS=Drosophila melanogaster GN=CG4236 PE=4 SV=1;sp|Q24572|CAF1_DROME Probable histone-binding protein Caf1 OS=Drosophila melanogaster GN=Caf1 PE=1 SV=1;tr|E1JIL4|E1JIL4_DROME Chromatin assembly factor 1, p55 subunit, isoform	3	4	4	48.634	430	10.322	11.6	8.1	13.3	15956000	31081000	156260000
E2QCF1;A0A0B4LFH8;Q7KN85;Q6AWP8;Q7JNC6	tr|E2QCF1|E2QCF1_DROME ATP-citrate synthase OS=Drosophila melanogaster GN=ATPCL PE=1 SV=1;tr|A0A0B4LFH8|A0A0B4LFH8_DROME ATP-citrate synthase OS=Drosophila melanogaster GN=ATPCL PE=1 SV=1;tr|Q7KN85|Q7KN85_DROME ATP-citrate synthase OS=Drosophila melanogast	5	18	18	119.75	1095	98.301	8.3	23	14.8	15918000	291640000	329110000
Q9VBQ5	tr|Q9VBQ5|Q9VBQ5_DROME CG5112 OS=Drosophila melanogaster GN=Dmel\CG5112 PE=1 SV=1	1	5	5	58.485	523	17.428	11.9	10.1	10.1	15695000	37614000	27706000
Q9VX15	tr|Q9VX15|Q9VX15_DROME CG8142 OS=Drosophila melanogaster GN=DmRFC2 PE=1 SV=2	1	4	4	39.554	353	29.251	7.9	7.9	12.5	15636000	30936000	61487000
Q960D3;Q9VBX3;B5RIY3;Q6NLK4;A0A0S0X2W5;D2A6L8;A0A0H4CMP0	tr|Q960D3|Q960D3_DROME SD06613p OS=Drosophila melanogaster GN=vig2 PE=1 SV=1;tr|Q9VBX3|Q9VBX3_DROME Vig2, isoform B OS=Drosophila melanogaster GN=vig2 PE=1 SV=2;tr|B5RIY3|B5RIY3_DROME FI06040p (Fragment) OS=Drosophila melanogaster GN=CG11844-RB PE=2 SV=1;t	7	12	12	45.219	412	55.808	17	37.6	33.3	15592000	188820000	323660000
Q9W1H4	sp|Q9W1H4|DNLI1_DROME DNA ligase 1 OS=Drosophila melanogaster GN=DNA-ligI PE=1 SV=2	1	15	15	84.718	747	49.168	10.6	14.5	30	15541000	78141000	331780000
Q9VDT5	tr|Q9VDT5|Q9VDT5_DROME Carboxypeptidase OS=Drosophila melanogaster GN=Dmel\CG4572 PE=1 SV=1	1	3	3	54.385	482	62.247	12.4	12.4	9.1	15503000	55182000	37197000
H1ZYG4;Q9VND8	tr|H1ZYG4|H1ZYG4_DROME Uncharacterized protein Rheb OS=Drosophila melanogaster GN=Rheb PE=4 SV=1;sp|Q9VND8|RHEB_DROME GTP-binding protein Rheb homolog OS=Drosophila melanogaster GN=Rheb PE=1 SV=1	2	2	2	20.73	182	3.3716	10.4	10.4	10.4	15408000	28623000	94340000
X2JC82;P02518	tr|X2JC82|X2JC82_DROME Heat shock protein 27, isoform B OS=Drosophila melanogaster GN=Hsp27 PE=3 SV=1;sp|P02518|HSP27_DROME Heat shock protein 27 OS=Drosophila melanogaster GN=Hsp27 PE=1 SV=2	2	5	5	23.616	213	12.931	26.3	26.3	31.5	15288000	67733000	154380000
M9PC31;M9PEF6;Q9VQX4	tr|M9PC31|M9PC31_DROME CG3714, isoform G OS=Drosophila melanogaster GN=AAF51037 PE=4 SV=1;tr|M9PEF6|M9PEF6_DROME CG3714, isoform H OS=Drosophila melanogaster GN=AAF51037 PE=4 SV=1;sp|Q9VQX4|PNCB_DROME Nicotinate phosphoribosyltransferase OS=Drosophila mela	3	8	8	61.503	550	27.431	12.4	21.1	15.6	15276000	104280000	73616000
Q9VS02;Q8SZM1	tr|Q9VS02|Q9VS02_DROME CG9953 OS=Drosophila melanogaster GN=Dmel\CG9953 PE=1 SV=1;tr|Q8SZM1|Q8SZM1_DROME RH04336p OS=Drosophila melanogaster GN=CG9953 PE=2 SV=1	2	2	2	56.861	508	6.5092	4.7	1.6	4.7	15138000	2977500	32435000
Q9VC87	tr|Q9VC87|Q9VC87_DROME RE57978p OS=Drosophila melanogaster GN=Dmel\CG18528 PE=1 SV=3	1	4	4	54.945	493	27.074	7.1	9.9	9.9	15048000	46817000	67462000
Q9VYD8;M9MS48;A0A1B2AJY5;D3DMZ8;Q02427	tr|Q9VYD8|Q9VYD8_DROME RE47308p OS=Drosophila melanogaster GN=Rbp1-like PE=2 SV=2;tr|M9MS48|M9MS48_DROME Rbp1-like, isoform B OS=Drosophila melanogaster GN=Rbp1-like PE=4 SV=1;tr|A0A1B2AJY5|A0A1B2AJY5_DROME GEO01114p1 (Fragment) OS=Drosophila melanogaster	5	3	3	16.799	158	25.42	22.2	16.5	16.5	15028000	27698000	172260000
Q9VIH1;C0MJ04;A0ANL2;A0ANL0;A0ANL8;Q8SXG3	tr|Q9VIH1|Q9VIH1_DROME CG9273 protein OS=Drosophila melanogaster GN=RPA2 PE=1 SV=2;tr|C0MJ04|C0MJ04_DROME CG9273-PA OS=Drosophila melanogaster GN=CG9273 PE=4 SV=1;tr|A0ANL2|A0ANL2_DROME CG9273 protein OS=Drosophila melanogaster GN=CG9273 PE=4 SV=1;tr|A0ANL	6	2	2	26.41	246	9.4494	13	13	13	15017000	45649000	49235000
Q9V3Q4	tr|Q9V3Q4|Q9V3Q4_DROME GH25379p OS=Drosophila melanogaster GN=Jafrac2 PE=1 SV=1	1	4	4	26.743	242	10.407	22.3	17.4	22.3	15011000	12993000	72838000
E1JHD6;P92208;E1JIV6;O61443;O62618	tr|E1JHD6|E1JHD6_DROME Mitogen-activated protein kinase OS=Drosophila melanogaster GN=bsk PE=1 SV=1;sp|P92208|JNK_DROME Stress-activated protein kinase JNK OS=Drosophila melanogaster GN=bsk PE=1 SV=1;tr|E1JIV6|E1JIV6_DROME Mitogen-activated protein kinase	5	2	2	43.026	372	3.2203	4.6	4.6	4.6	15005000	169180000	266370000
Q9Y124	tr|Q9Y124|Q9Y124_DROME BcDNA.GH08385 OS=Drosophila melanogaster GN=BcDNA.GH08385 PE=1 SV=1	1	2	2	51.046	448	4.0476	10.5	10.5	10.5	14885000	12559000	24085000
Q95RF6	tr|Q95RF6|Q95RF6_DROME LD34461p OS=Drosophila melanogaster GN=Tom20 PE=1 SV=1	1	3	3	18.784	171	71.614	30.4	17	30.4	14819000	33016000	91374000
Q8IN56;C9QP47;Q9I7I8;C6TPA8;A0A0B4JDD8;A0A0B4JDG2;B7Z0M9;Q7KSB3;A0A0B4JCZ0;Q8IN55;Q86NP7	tr|Q8IN56|Q8IN56_DROME Oxysterol-binding protein OS=Drosophila melanogaster GN=Dmel\CG42668 PE=1 SV=4;tr|C9QP47|C9QP47_DROME Oxysterol-binding protein OS=Drosophila melanogaster GN=CG5077-RF PE=2 SV=1;tr|Q9I7I8|Q9I7I8_DROME Oxysterol-binding protein OS=Dro	11	6	6	89.535	798	27.472	7.9	6.5	12	14782000	24376000	96715000
Q9VCH5;Q86G43;Q868A8;Q867W7;Q867M7;Q867M2;Q867H5;Q6NP55;A1YK38;A1YK36;A1YK35;A1YK33;A1YK27;A1YK25;A1YK24;B8A421	tr|Q9VCH5|Q9VCH5_DROME Nucleoporin 98-96kD, isoform A OS=Drosophila melanogaster GN=Nup98-96 PE=1 SV=3;tr|Q86G43|Q86G43_DROME Nucleoporin 98-96 (Fragment) OS=Drosophila melanogaster GN=Nup98-96 PE=4 SV=1;tr|Q868A8|Q868A8_DROME Nucleoporin 98-96 (Fragment)	16	8	8	210.14	1960	21.277	1.9	4.2	4.5	14740000	90459000	88046000
Q9VVA7;Q8MQZ0;Q3YNA6	tr|Q9VVA7|Q9VVA7_DROME Tumor suppressor protein 101 OS=Drosophila melanogaster GN=TSG101 PE=1 SV=2;tr|Q8MQZ0|Q8MQZ0_DROME RE26756p OS=Drosophila melanogaster GN=TSG101 PE=2 SV=1	3	5	5	45.19	408	15.791	11	10.8	14.2	14682000	15932000	58538000
B5RIS4;Q9U5L1	tr|B5RIS4|B5RIS4_DROME FI05231p OS=Drosophila melanogaster GN=Gtp-bp-RA PE=2 SV=1;sp|Q9U5L1|SRPRA_DROME Signal recognition particle receptor subunit alpha homolog OS=Drosophila melanogaster GN=Gtp-bp PE=1 SV=2	2	3	3	67.794	614	31.894	8	3.9	10.4	14649000	33467000	97679000
Q24201;Q9VIB5;Q8IH63	tr|Q24201|Q24201_DROME Carboxylic ester hydrolase (Fragment) OS=Drosophila melanogaster GN=alpha-Est7 PE=3 SV=1;tr|Q9VIB5|Q9VIB5_DROME Carboxylic ester hydrolase OS=Drosophila melanogaster GN=alpha-Est7 PE=1 SV=1;tr|Q8IH63|Q8IH63_DROME GH05794p OS=Drosophi	3	4	4	63.397	556	9.9186	9.9	5.2	6.7	14638000	15440000	23262000
Q9W5E4;Q5BIF7;Q24034;O77426;Q8MRJ3	tr|Q9W5E4|Q9W5E4_DROME FI21448p1 OS=Drosophila melanogaster GN=l(1)1Bi PE=1 SV=1;tr|Q5BIF7|Q5BIF7_DROME RE47565p OS=Drosophila melanogaster GN=l(1)1Bi PE=2 SV=1;tr|Q24034|Q24034_DROME Lethal(1)1Bi protein OS=Drosophila melanogaster GN=l(1)1Bi PE=4 SV=1;tr|	5	13	13	127.87	1133	48.867	4.2	12.4	9.4	14607000	239900000	185240000
E2QCZ9;Q7JZB4	tr|E2QCZ9|E2QCZ9_DROME CG1129, isoform B OS=Drosophila melanogaster GN=Dmel\CG1129 PE=1 SV=1;sp|Q7JZB4|GMPPB_DROME Mannose-1-phosphate guanyltransferase beta OS=Drosophila melanogaster GN=CG1129 PE=1 SV=1	2	5	5	40.448	369	39.927	11.7	6.8	21.7	14513000	34389000	197040000
Q09332	sp|Q09332|UGGG_DROME UDP-glucose:glycoprotein glucosyltransferase OS=Drosophila melanogaster GN=Ugt PE=1 SV=2	1	8	8	174.35	1548	15.153	6	4.3	4.8	14381000	16656000	37175000
P13496	sp|P13496|DCTN1_DROME Dynactin subunit 1 OS=Drosophila melanogaster GN=Gl PE=1 SV=2	1	11	11	141.22	1265	50.763	8.1	4.3	12.9	14370000	25919000	160820000
Q9VNA3	tr|Q9VNA3|Q9VNA3_DROME GH21273p OS=Drosophila melanogaster GN=CG-11999 PE=1 SV=1	1	5	5	23.633	216	67.601	20.4	25.9	25.9	14356000	79281000	163770000
M9NEV0;Q9VMJ7	tr|M9NEV0|M9NEV0_DROME Little imaginal discs, isoform C OS=Drosophila melanogaster GN=lid PE=4 SV=1;sp|Q9VMJ7|KDM5_DROME Lysine-specific demethylase lid OS=Drosophila melanogaster GN=lid PE=1 SV=1	2	13	13	203.99	1838	89.566	3.8	5.4	9.1	14332000	57680000	169270000
O76767	sp|O76767|ERD2_DROME ER lumen protein-retaining receptor OS=Drosophila melanogaster GN=KdelR PE=2 SV=1	1	2	2	24.482	212	65.23	13.7	13.7	13.7	14188000	37215000	40718000
Q8MRF5;Q7YZ91	tr|Q8MRF5|Q8MRF5_DROME AT11826p OS=Drosophila melanogaster GN=CG6808 PE=2 SV=1;tr|Q7YZ91|Q7YZ91_DROME CG6808, isoform A OS=Drosophila melanogaster GN=Dmel\CG6808 PE=2 SV=1	2	1	1	43.255	375	1.9947	2.1	2.1	2.1	14033000	93130000	57561000
Q7K0D8	sp|Q7K0D8|NUP50_DROME Nuclear pore complex protein Nup50 OS=Drosophila melanogaster GN=Nup50 PE=2 SV=1	1	9	9	59.434	564	59.095	9.8	12.8	26.4	14017000	36399000	259730000
A0A0B4LHV8;Q9VC57	tr|A0A0B4LHV8|A0A0B4LHV8_DROME Atlastin, isoform C OS=Drosophila melanogaster GN=atl PE=4 SV=1;sp|Q9VC57|ATLAS_DROME Atlastin OS=Drosophila melanogaster GN=atl PE=1 SV=1	2	5	5	60.911	541	11.866	7	10.7	8.5	13923000	60891000	67947000
A0A0B4KHW7;Q961V3;A0A0B4KHJ3;A0A0B4KHF5;A0A0B4JD23;Q7KRU0;Q8IMI0;A0A0B4JDE3;Q9VA53	tr|A0A0B4KHW7|A0A0B4KHW7_DROME CG2246, isoform P OS=Drosophila melanogaster GN=Dmel\CG2246 PE=1 SV=1;tr|Q961V3|Q961V3_DROME CG2246, isoform D OS=Drosophila melanogaster GN=Dmel\CG2246 PE=1 SV=1;tr|A0A0B4KHJ3|A0A0B4KHJ3_DROME CG2246, isoform N OS=Drosophila	9	6	6	39.357	356	19.029	19.9	15.4	15.4	13903000	56745000	53947000
Q9VU02	sp|Q9VU02|SMD1_DROME Probable small nuclear ribonucleoprotein Sm D1 OS=Drosophila melanogaster GN=SmD1 PE=1 SV=1	1	1	1	13.796	124	6.7955	16.1	16.1	16.1	13881000	41633000	42978000
A1Z8U0;Q960V2;Q6NLN4	tr|A1Z8U0|A1Z8U0_DROME Pre-mRNA processing factor 8 OS=Drosophila melanogaster GN=Prp8 PE=1 SV=1;tr|Q960V2|Q960V2_DROME LD33339p OS=Drosophila melanogaster GN=Prp8 PE=2 SV=1	3	14	14	279.57	2396	57.19	3.4	6	5.1	13731000	95436000	155900000
M9PBZ9;P48598	tr|M9PBZ9|M9PBZ9_DROME Eukaryotic initiation factor 4E, isoform H OS=Drosophila melanogaster GN=eIF4E1 PE=1 SV=1;sp|P48598|IF4E_DROME Eukaryotic translation initiation factor 4E OS=Drosophila melanogaster GN=eIF-4E PE=1 SV=1	2	6	6	29.223	259	34.464	22.8	26.6	36.3	13673000	26429000	220190000
J9TIE4;J9THZ9;C6KI54;A0A0A0RZ60;A0A126QBG4;C8CB16;P00408;A0A088BCF8;A0A126QBH8	tr|J9TIE4|J9TIE4_DROME Cytochrome c oxidase subunit 2 OS=Drosophila melanogaster GN=COX2 PE=3 SV=1;tr|J9THZ9|J9THZ9_DROME Cytochrome c oxidase subunit 2 OS=Drosophila melanogaster GN=COX2 PE=3 SV=1;tr|C6KI54|C6KI54_DROME Cytochrome c oxidase subunit 2 OS=D	9	2	2	26.22	228	9.4543	15.8	15.8	15.8	13648000	9913800	31035000
C7LAA5;Q86NY3;Q8MRW8	tr|C7LAA5|C7LAA5_DROME GM15464p OS=Drosophila melanogaster GN=CG30122-RB PE=2 SV=1	3	17	2	121.26	1095	141.89	10	20.7	14.2	13630000	269150000	207630000
Q9VL69	tr|Q9VL69|Q9VL69_DROME CG5885, isoform A OS=Drosophila melanogaster GN=AI945207 PE=1 SV=1	1	2	2	21.636	190	46.513	10	10	10	13540000	55912000	96129000
Q9VLX0;Q6NP53	tr|Q9VLX0|Q9VLX0_DROME Lysine ketoglutarate reductase/saccharopine dehydrogenase, isoform A OS=Drosophila melanogaster GN=LKRSDH PE=1 SV=2;tr|Q6NP53|Q6NP53_DROME SD02276p (Fragment) OS=Drosophila melanogaster GN=BEST:CK02318 PE=2 SV=2	2	11	11	103.12	928	29.578	5.8	15.4	14.4	13395000	143780000	231970000
Q8IN05;A2VEF2;I6QP77;Q9NH51;Q9VD13;I6R4B6	tr|Q8IN05|Q8IN05_DROME Liquid facets-Related, isoform D OS=Drosophila melanogaster GN=lqfR PE=1 SV=2;tr|A2VEF2|A2VEF2_DROME IP13269p OS=Drosophila melanogaster GN=CG31285 PE=2 SV=1	6	10	10	158.01	1415	33.471	5.9	4.7	9.8	13350000	23797000	178050000
Q24478	sp|Q24478|CP190_DROME Centrosome-associated zinc finger protein CP190 OS=Drosophila melanogaster GN=Cp190 PE=1 SV=2	1	11	11	121.68	1096	59.902	5.7	7.7	17.2	13314000	86856000	213880000
Q9VI58;Q86BP3;A0A0B4KGN4	sp|Q9VI58|TUTT_DROME Terminal uridylyltransferase Tailor OS=Drosophila melanogaster GN=Tailor PE=1 SV=1;tr|Q86BP3|Q86BP3_DROME Tailor, isoform A OS=Drosophila melanogaster GN=Tailor PE=1 SV=1;tr|A0A0B4KGN4|A0A0B4KGN4_DROME Tailor, isoform C OS=Drosophila m	3	5	5	63.944	560	20.174	7.7	12.7	12.7	13279000	72055000	118500000
X2J9F3;Q9VKJ3	tr|X2J9F3|X2J9F3_DROME Nucleoporin 160kD, isoform B OS=Drosophila melanogaster GN=Nup160 PE=4 SV=1;sp|Q9VKJ3|NU160_DROME Nuclear pore complex protein Nup160 homolog OS=Drosophila melanogaster GN=Nup160 PE=1 SV=1	2	11	11	160.27	1411	43.668	4	11.1	8.8	13248000	124590000	112560000
C6SUY3;Q9V461	tr|C6SUY3|C6SUY3_DROME DNA helicase OS=Drosophila melanogaster GN=Mcm6-RA PE=2 SV=1;sp|Q9V461|MCM6_DROME DNA replication licensing factor Mcm6 OS=Drosophila melanogaster GN=Mcm6 PE=1 SV=1	2	12	12	92.352	817	65.064	6.7	11.4	17	13221000	101990000	269000000
X2J564;Q9VLT1	tr|X2J564|X2J564_DROME Monensin sensitivity 2, isoform C OS=Drosophila melanogaster GN=mon2 PE=4 SV=1;sp|Q9VLT1|MON2_DROME Protein MON2 homolog OS=Drosophila melanogaster GN=mon2 PE=2 SV=4	2	6	6	186.99	1684	18.064	4	3.1	2	13216000	28763000	26726000
Q9VDC9	tr|Q9VDC9|Q9VDC9_DROME O-GlcNAcase OS=Drosophila melanogaster GN=Oga PE=1 SV=1	1	5	5	113.83	1019	19.855	5.9	4.2	7.1	13196000	23328000	72296000
Q05856	sp|Q05856|RSMB_DROME Small nuclear ribonucleoprotein-associated protein B OS=Drosophila melanogaster GN=SmB PE=1 SV=1	1	4	4	21.021	199	14.996	18.1	25.1	25.1	13161000	104290000	102580000
Q24492	sp|Q24492|RFA1_DROME Replication protein A 70 kDa DNA-binding subunit OS=Drosophila melanogaster GN=RpA-70 PE=1 SV=1	1	6	6	66.624	603	22.307	9.5	9.8	9.8	13153000	38524000	57357000
Q9VP06	tr|Q9VP06|Q9VP06_DROME HL02815p OS=Drosophila melanogaster GN=Alg11 PE=1 SV=2	1	3	3	54.553	475	8.44	7.4	7.4	4.4	12991000	30489000	16998000
Q7KK96;Q4QQB8;Q8T0F9	tr|Q7KK96|Q7KK96_DROME Structural maintenance of chromosomes protein OS=Drosophila melanogaster GN=SMC2 PE=1 SV=1;tr|Q4QQB8|Q4QQB8_DROME LD32453p (Fragment) OS=Drosophila melanogaster PE=2 SV=1;tr|Q8T0F9|Q8T0F9_DROME LD05471p (Fragment) OS=Drosophila melan	3	12	12	134.33	1179	27.861	6.7	9.8	13.4	12885000	44377000	161970000
Q9VJ44;Q24507;Q24506;Q9VJ43	tr|Q9VJ44|Q9VJ44_DROME SD06839p OS=Drosophila melanogaster GN=Dmel\CG17597 PE=1 SV=2;tr|Q24507|Q24507_DROME Sterol carrier protein x-related thiolase OS=Drosophila melanogaster GN=ScpX PE=2 SV=1;tr|Q24506|Q24506_DROME Sterol carrier protein x OS=Drosophila	4	4	4	43.904	407	9.9856	5.7	11.1	9.3	12844000	39901000	138340000
Q8SX89;D3DML4	tr|Q8SX89|Q8SX89_DROME Kugelkern, isoform A OS=Drosophila melanogaster GN=kuk PE=1 SV=1;tr|D3DML4|D3DML4_DROME MIP15309p (Fragment) OS=Drosophila melanogaster GN=kuk-RB PE=2 SV=1	2	8	8	60.159	570	86.565	10.4	7.9	18.8	12757000	12991000	180470000
Q9VRI6;X2JCW3;B7Z153	tr|Q9VRI6|Q9VRI6_DROME Dpr-interacting protein beta, isoform D OS=Drosophila melanogaster GN=DIP-beta PE=2 SV=2;tr|X2JCW3|X2JCW3_DROME Dpr-interacting protein beta, isoform G OS=Drosophila melanogaster GN=DIP-beta PE=4 SV=1;tr|B7Z153|B7Z153_DROME Dpr-inter	3	1	1	20.293	190	2.1304	6.8	6.8	6.8	12709000	7797600	43934000
Q95S39;Q8MKL4;A1ZAQ4	tr|Q95S39|Q95S39_DROME GM09915p OS=Drosophila melanogaster GN=CG15611 PE=2 SV=1;tr|Q8MKL4|Q8MKL4_DROME RE34668p OS=Drosophila melanogaster GN=CG15611 PE=2 SV=1;tr|A1ZAQ4|A1ZAQ4_DROME Uncharacterized protein, isoform A OS=Drosophila melanogaster GN=CG15611	3	5	5	51.988	452	31.52	7.1	1.5	16.6	12696000	12696000	142110000
A1Z934	tr|A1Z934|A1Z934_DROME CG8778 OS=Drosophila melanogaster GN=CG8778 PE=1 SV=1	1	5	5	31.909	299	31.333	11.7	18.4	18.4	12670000	37510000	90485000
Q9I7R0;C0PDF4;M9PEW1;C0PV64	tr|Q9I7R0|Q9I7R0_DROME GH04560p OS=Drosophila melanogaster GN=APT1 PE=1 SV=1;tr|C0PDF4|C0PDF4_DROME MIP06482p OS=Drosophila melanogaster GN=CG18815-RA PE=1 SV=1;tr|M9PEW1|M9PEW1_DROME Uncharacterized protein, isoform E OS=Drosophila melanogaster GN=anon-ES	4	2	2	23.162	216	4.3124	18.1	18.1	0	12651000	15434000	0
Q9VDY8;Q8T3L2;A0A0B4KGG5	tr|Q9VDY8|Q9VDY8_DROME MIP08680p OS=Drosophila melanogaster GN=vib PE=1 SV=1;tr|Q8T3L2|Q8T3L2_DROME SD01527p OS=Drosophila melanogaster GN=vib PE=2 SV=1;tr|A0A0B4KGG5|A0A0B4KGG5_DROME Vibrator, isoform B OS=Drosophila melanogaster GN=vib PE=1 SV=1	3	2	2	31.286	272	11.369	14.7	8.5	8.5	12632000	15953000	11892000
Q0E924;A8DYI7;A8DYI6	tr|Q0E924|Q0E924_DROME LD46344p OS=Drosophila melanogaster GN=Phb2 PE=1 SV=2;tr|A8DYI7|A8DYI7_DROME Prohibitin 2, isoform D OS=Drosophila melanogaster GN=Phb2 PE=1 SV=1;tr|A8DYI6|A8DYI6_DROME Prohibitin 2, isoform E OS=Drosophila melanogaster GN=Phb2 PE=1	3	4	4	33.066	299	10.883	10	5.4	10	12563000	0	62111000
Q9VKC8;Q8MT29	tr|Q9VKC8|Q9VKC8_DROME FI03495p OS=Drosophila melanogaster GN=Tom70 PE=1 SV=2;tr|Q8MT29|Q8MT29_DROME RE66761p OS=Drosophila melanogaster GN=Tom70 PE=2 SV=1	2	8	8	66.363	589	28.306	9.5	15.6	15.6	12403000	104070000	238670000
M9MRS7;Q23978	tr|M9MRS7|M9MRS7_DROME Myosin 31DF, isoform C OS=Drosophila melanogaster GN=Myo31DF PE=3 SV=1;sp|Q23978|MY31D_DROME Myosin-IA OS=Drosophila melanogaster GN=Myo31DF PE=2 SV=1	2	10	10	117.09	1011	103.09	7	7.1	12.5	12384000	36014000	172820000
O76521;Q9U1H6;Q5U119;Q8MZI6	tr|O76521|O76521_DROME Importin subunit alpha OS=Drosophila melanogaster GN=Kap-alpha1 PE=2 SV=1;tr|Q9U1H6|Q9U1H6_DROME Importin subunit alpha OS=Drosophila melanogaster GN=Kap-alpha1 PE=3 SV=1;tr|Q5U119|Q5U119_DROME LP05312p OS=Drosophila melanogaster GN=	4	5	5	60.009	543	10.957	10.3	7.2	9	12363000	24056000	96939000
Q9VGM2;Q8IGA2;Q8INK2;Q8INK3	tr|Q9VGM2|Q9VGM2_DROME Fatty acid binding protein, isoform B OS=Drosophila melanogaster GN=fabp PE=1 SV=1;tr|Q8IGA2|Q8IGA2_DROME SD12036p (Fragment) OS=Drosophila melanogaster GN=fabp PE=2 SV=1;tr|Q8INK2|Q8INK2_DROME Fatty acid binding protein, isoform A O	4	2	2	14.502	130	5.1548	20	20	6.9	12295000	25733000	13295000
A0A0B4LH53;P54351;A9YH29;F6J9Y7;M9PH10;P46461	tr|A0A0B4LH53|A0A0B4LH53_DROME N-ethylmaleimide-sensitive factor 2, isoform B OS=Drosophila melanogaster GN=Nsf2 PE=4 SV=1;sp|P54351|NSF2_DROME Vesicle-fusing ATPase 2 OS=Drosophila melanogaster GN=Nsf2 PE=2 SV=2	6	9	9	83.433	752	23.968	10.8	11.3	13.7	12272000	47900000	97362000
Q8SY17;Q7KJ73	tr|Q8SY17|Q8SY17_DROME Tetraspanin OS=Drosophila melanogaster GN=Tsp42Ee PE=2 SV=1;tr|Q7KJ73|Q7KJ73_DROME Tetraspanin OS=Drosophila melanogaster GN=Tsp42Ee PE=1 SV=1	2	2	2	24.81	228	5.2907	3.9	3.9	11	12183000	9188900	28273000
Q9V3N6	tr|Q9V3N6|Q9V3N6_DROME Transmembrane 9 superfamily member OS=Drosophila melanogaster GN=TM9SF4 PE=1 SV=1	1	5	5	72.536	630	43.173	7.3	6.7	0	12181000	29546000	0
B4F5V1;B4F5V0;B4F5U4;Q9VYY2	tr|B4F5V1|B4F5V1_DROME CG1751-PA OS=Drosophila melanogaster GN=CG1751 PE=4 SV=1;tr|B4F5V0|B4F5V0_DROME CG1751-PA OS=Drosophila melanogaster GN=CG1751 PE=4 SV=1;tr|B4F5U4|B4F5U4_DROME CG1751-PA OS=Drosophila melanogaster GN=Spase25 PE=1 SV=1;sp|Q9VYY2|SPCS2	4	4	4	22.117	199	10.554	21.1	25.6	9.5	12157000	47906000	37301000
Q9W140	tr|Q9W140|Q9W140_DROME CG3548 OS=Drosophila melanogaster GN=CG3548 PE=1 SV=1	1	5	5	50.47	453	9.3484	7.7	0	11	12131000	0	77568000
Q7K2W6;Q27598;Q9GV29;E2RWQ0	tr|Q7K2W6|Q7K2W6_DROME GH04080p OS=Drosophila melanogaster GN=PPO1 PE=1 SV=1;tr|Q27598|Q27598_DROME Pro-phenol oxidase A1 OS=Drosophila melanogaster PE=1 SV=1	4	10	10	79.09	690	84.33	11.2	8.4	19.6	12101000	31801000	242310000
Q7KKH3	sp|Q7KKH3|SDA1_DROME Protein SDA1 homolog OS=Drosophila melanogaster GN=Mys45A PE=1 SV=1	1	3	3	81.983	712	5.9297	4.8	1.5	7.6	12078000	186670000	209580000
Q9U9K4;Q8MS03;Q0E931;D5AEL6	tr|Q9U9K4|Q9U9K4_DROME DGP-1 protein OS=Drosophila melanogaster GN=Dgp-1 PE=2 SV=1;tr|Q8MS03|Q8MS03_DROME RH49745p OS=Drosophila melanogaster GN=Dgp-1 PE=2 SV=1;tr|Q0E931|Q0E931_DROME Dgp-1, isoform A OS=Drosophila melanogaster GN=Dgp-1 PE=1 SV=1;tr|D5AEL6	4	5	5	72.553	669	15.361	8.7	7	7.3	12019000	14368000	40094000
Q9V9S8	sp|Q9V9S8|HEMH_DROME Ferrochelatase, mitochondrial OS=Drosophila melanogaster GN=FeCh PE=2 SV=1	1	4	4	43.597	384	20.719	17.2	22.4	22.4	11968000	52876000	155260000
Q9VDL2;Q86BR8	tr|Q9VDL2|Q9VDL2_DROME LD40493p OS=Drosophila melanogaster GN=TFAM PE=1 SV=1;tr|Q86BR8|Q86BR8_DROME Mitochondrial transcription factor A, isoform B OS=Drosophila melanogaster GN=TFAM PE=1 SV=1	2	4	4	29.963	257	12.099	8.6	17.1	5.1	11913000	41135000	17462000
Q9V400;Q9NHC7	tr|Q9V400|Q9V400_DROME Integrin linked kinase, isoform A OS=Drosophila melanogaster GN=Ilk PE=1 SV=1;tr|Q9NHC7|Q9NHC7_DROME Integrin-linked kinase OS=Drosophila melanogaster GN=Ilk PE=2 SV=1	2	4	4	50.742	448	8.7715	5.8	4	7.4	11904000	23659000	112130000
Q9VN88	tr|Q9VN88|Q9VN88_DROME LD45836p OS=Drosophila melanogaster GN=Vps37B PE=1 SV=1	1	1	1	24.262	214	-2	5.1	0	0	11903000	0	0
M9PFM5;M9PFS6;P25439	tr|M9PFM5|M9PFM5_DROME Brahma, isoform F OS=Drosophila melanogaster GN=brm PE=4 SV=1;tr|M9PFS6|M9PFS6_DROME Brahma, isoform E OS=Drosophila melanogaster GN=brm PE=4 SV=1;sp|P25439|BRM_DROME ATP-dependent helicase brm OS=Drosophila melanogaster GN=brm PE=1	3	10	10	185.61	1642	79.153	3.4	1.2	10.6	11872000	15835000	159620000
Q9W4W2;Q9UB20;O76911;A0A075BJJ6;Q8MZ98	tr|Q9W4W2|Q9W4W2_DROME Female sterile (1) Yb OS=Drosophila melanogaster GN=fs(1)Yb PE=1 SV=1;tr|Q9UB20|Q9UB20_DROME Fs(1)YB OS=Drosophila melanogaster GN=fs(1)Yb PE=2 SV=1;tr|O76911|O76911_DROME EG:95B7.8 protein OS=Drosophila melanogaster GN=EG:95B7.8 PE=	5	16	2	117.45	1042	131.67	7	0.9	20.3	11839000	2518400	618750000
A0A0H4Y1G5;A0A0B4LGZ6;P51592;N0D584;B5RJK6	tr|A0A0H4Y1G5|A0A0H4Y1G5_DROME FI24602p1 OS=Drosophila melanogaster GN=hyd-RA PE=2 SV=1;tr|A0A0B4LGZ6|A0A0B4LGZ6_DROME Hyperplastic discs, isoform B OS=Drosophila melanogaster GN=hyd PE=1 SV=1;sp|P51592|HYD_DROME E3 ubiquitin-protein ligase hyd OS=Drosophi	5	24	24	318.88	2885	156.23	4.6	1.5	12.8	11834000	18404000	315400000
T1W131;Q9VYY3	tr|T1W131|T1W131_DROME FI23937p1 OS=Drosophila melanogaster GN=CG1749-RA PE=2 SV=1;sp|Q9VYY3|UBA5_DROME Ubiquitin-like modifier-activating enzyme 5 OS=Drosophila melanogaster GN=Uba5 PE=2 SV=1	2	2	2	44.166	404	6.7816	7.2	7.2	7.2	11815000	27760000	21812000
P91875	sp|P91875|RPA1_DROME DNA-directed RNA polymerase I subunit RPA1 OS=Drosophila melanogaster GN=RpI1 PE=1 SV=2	1	15	15	185.41	1642	48.222	5	12.9	10.8	11799000	320110000	160510000
Q9W335	tr|Q9W335|Q9W335_DROME LD26546p OS=Drosophila melanogaster GN=l(1)G0320 PE=1 SV=1	1	3	3	33.03	302	39.61	5	20.5	5	11773000	68247000	88787000
Q9V463	sp|Q9V463|NU154_DROME Nuclear pore complex protein Nup154 OS=Drosophila melanogaster GN=Nup154 PE=1 SV=1	1	7	7	153.89	1365	33.1	3.7	7.4	6.2	11754000	60252000	133240000
Q8MLX7	tr|Q8MLX7|Q8MLX7_DROME Vacuolar ATPase 68 kDa subunit A (Fragment) OS=Drosophila melanogaster GN=Vha68-1 PE=4 SV=1	1	3	1	26.199	241	-2	21.6	14.9	14.9	11662000	0	0
C0PUW8;Q9V9S0;Q8SZP0	tr|C0PUW8|C0PUW8_DROME MIP02948p OS=Drosophila melanogaster GN=CG3305-RA PE=2 SV=1;tr|Q9V9S0|Q9V9S0_DROME FI04419p OS=Drosophila melanogaster GN=Lamp1 PE=1 SV=3;tr|Q8SZP0|Q8SZP0_DROME RE72002p OS=Drosophila melanogaster GN=Lamp1 PE=2 SV=1	3	1	1	22.573	202	2.3959	8.4	8.4	8.4	11633000	47675000	57389000
Q8MSR4;Q9GQ88;Q8MPP2;A1ZA22;Q95SC4	tr|Q8MSR4|Q8MSR4_DROME SD04737p OS=Drosophila melanogaster GN=eIF2Bgamma PE=2 SV=1;tr|Q9GQ88|Q9GQ88_DROME Eukaryotic initiation factor eIF2B gamma subunit OS=Drosophila melanogaster GN=eIF2Bgamma PE=2 SV=1;tr|Q8MPP2|Q8MPP2_DROME eIF2B-gamma protein OS=Dros	5	8	8	50.627	455	19.541	12.3	14.3	14.3	11520000	21348000	51865000
Q494L6;Q0E8X6;Q9W1Q8;Q8MPP1	tr|Q494L6|Q494L6_DROME RE55357p OS=Drosophila melanogaster GN=eIF2B-delta PE=2 SV=1;tr|Q0E8X6|Q0E8X6_DROME eIF2B-delta, isoform B OS=Drosophila melanogaster GN=eIF2Bdelta PE=1 SV=1;tr|Q9W1Q8|Q9W1Q8_DROME LD05345p OS=Drosophila melanogaster GN=eIF2Bdelta PE	4	7	7	61.868	576	35.456	10.9	8.2	17.7	11331000	21844000	100380000
P54352;X2JFQ7	sp|P54352|EAS_DROME Ethanolamine kinase OS=Drosophila melanogaster GN=eas PE=1 SV=2	2	7	7	59.562	518	21.012	13.1	10.4	21	11272000	30866000	116070000
Q7KY04;B5RJE3;Q8MSX0	tr|Q7KY04|Q7KY04_DROME Rab4 protein OS=Drosophila melanogaster GN=Rab4 PE=1 SV=1;tr|B5RJE3|B5RJE3_DROME FI09101p (Fragment) OS=Drosophila melanogaster GN=Rab4-RB PE=2 SV=1	3	4	4	23.573	213	9.7918	23.5	16	18.3	11259000	18074000	24905000
M9PCI2;Q9V3U2	tr|M9PCI2|M9PCI2_DROME GEO11453p1 OS=Drosophila melanogaster GN=NHP2 PE=2 SV=1;sp|Q9V3U2|NHP2_DROME H/ACA ribonucleoprotein complex subunit 2-like protein OS=Drosophila melanogaster GN=NHP2 PE=1 SV=1	2	4	4	17.723	160	10.821	20.6	31.2	11.2	11189000	92563000	26210000
Q9V3Y4	tr|Q9V3Y4|Q9V3Y4_DROME LD43650p OS=Drosophila melanogaster GN=Mtch PE=1 SV=1	1	4	4	35.011	316	11.178	15.2	18.7	18.7	11115000	29896000	36573000
Q9W0H3	sp|Q9W0H3|LDAH_DROME Lipid droplet-associated hydrolase OS=Drosophila melanogaster GN=CG9186 PE=2 SV=1	1	3	3	35.735	307	21.427	9.8	17.6	17.6	11077000	68496000	42640000
Q9W4X7;F3YDD7;Q9VDM6	sp|Q9W4X7|EI3GA_DROME Eukaryotic translation initiation factor 3 subunit G-A OS=Drosophila melanogaster GN=eIF3ga PE=1 SV=1;tr|F3YDD7|F3YDD7_DROME Eukaryotic translation initiation factor 3 subunit G OS=Drosophila melanogaster GN=CG10881-RA PE=2 SV=1;sp|Q9	3	4	4	29.946	269	5.7341	6.3	6.7	10.8	11074000	20998000	121010000
M9PGL7;Q9U4L6;H0RNC6;A1Z6L1	tr|M9PGL7|M9PGL7_DROME Translocase of outer membrane 40, isoform C OS=Drosophila melanogaster GN=Tom40 PE=4 SV=1;sp|Q9U4L6|TO401_DROME Mitochondrial import receptor subunit TOM40 homolog 1 OS=Drosophila melanogaster GN=Tom40 PE=2 SV=2	4	3	3	36.336	344	6.6573	7	9.6	3.8	11048000	37620000	19760000
Q9W4P5	sp|Q9W4P5|VA0D1_DROME V-type proton ATPase subunit d 1 OS=Drosophila melanogaster GN=VhaAC39-1 PE=2 SV=1	1	4	4	39.851	350	7.7926	14.9	10	18.3	10950000	13555000	55104000
Q9V9Q6	tr|Q9V9Q6|Q9V9Q6_DROME AT16263p OS=Drosophila melanogaster GN=step PE=2 SV=2	1	1	1	47.701	410	-2	2.7	0	2.7	10932000	0	15975000
Q9W3W1;A8JV09;D6W4T8;A2VEW7	tr|Q9W3W1|Q9W3W1_DROME Coronin OS=Drosophila melanogaster GN=pod1 PE=1 SV=1;tr|A8JV09|A8JV09_DROME Coronin OS=Drosophila melanogaster GN=pod1 PE=1 SV=1;tr|D6W4T8|D6W4T8_DROME Coronin OS=Drosophila melanogaster GN=pod1 PE=1 SV=1	4	5	5	119.35	1074	9.6748	5.9	1.2	0	10932000	3440400	0
Q8MLR4;O61602;O44203;O16114;Q9W1M6;O17430;A0A0B4KGD0;D3DMD0	tr|Q8MLR4|Q8MLR4_DROME Apontic, isoform E OS=Drosophila melanogaster GN=apt PE=1 SV=1;tr|O61602|O61602_DROME Apontic OS=Drosophila melanogaster GN=apt PE=1 SV=1;tr|O44203|O44203_DROME Tracheae defective protein OS=Drosophila melanogaster GN=apt PE=2 SV=1;t	8	3	3	52.948	469	8.1982	6.2	0	8.1	10881000	0	77698000
Q8T0Q4	tr|Q8T0Q4|Q8T0Q4_DROME GH13992p OS=Drosophila melanogaster GN=shrb PE=1 SV=1	1	1	1	25.443	226	3.3193	5.3	0	0	10853000	0	0
A4V3L8;Q9VAF0	tr|A4V3L8|A4V3L8_DROME Zinc/iron regulated transporter-related protein 99C, isoform D OS=Drosophila melanogaster GN=Zip99C PE=1 SV=1;sp|Q9VAF0|S39AD_DROME Zinc transporter ZIP13 homolog OS=Drosophila melanogaster GN=Zip99C PE=2 SV=1	2	3	3	38.869	355	29.914	4.5	15.5	15.5	10721000	73341000	95696000
Q9Y105	sp|Q9Y105|SYQ_DROME Probable glutamine--tRNA ligase OS=Drosophila melanogaster GN=Aats-gln PE=2 SV=1	1	4	4	87.507	778	9.5121	5.5	2.3	4.2	10710000	14152000	33765000
X2JEW2;C9QPD2;C5WLN0;Q9VYA7	tr|X2JEW2|X2JEW2_DROME CG2691, isoform B OS=Drosophila melanogaster GN=Dmel\CG2691 PE=1 SV=1;tr|C9QPD2|C9QPD2_DROME LD23114p (Fragment) OS=Drosophila melanogaster GN=CG2691-RA PE=2 SV=1;tr|C5WLN0|C5WLN0_DROME RE72321p (Fragment) OS=Drosophila melanogaster	4	6	6	153.56	1384	59.584	4	4	6.3	10685000	28680000	119180000
Q9VLT7;C5WLN8;Q29QX9	tr|Q9VLT7|Q9VLT7_DROME IP17351p OS=Drosophila melanogaster GN=RpL36A PE=1 SV=2;tr|C5WLN8|C5WLN8_DROME TA01007p (Fragment) OS=Drosophila melanogaster GN=RpL36A-RA PE=2 SV=1;tr|Q29QX9|Q29QX9_DROME IP15820p (Fragment) OS=Drosophila melanogaster PE=2 SV=1	3	3	3	12.501	104	20.316	12.5	21.2	21.2	10671000	234690000	447340000
P80455	sp|P80455|RS12_DROME 40S ribosomal protein S12 OS=Drosophila melanogaster GN=RpS12 PE=1 SV=2	1	4	4	15.168	139	11.364	10.8	23.7	31.7	10668000	24120000	64026000
Q9XYZ5	sp|Q9XYZ5|DDB1_DROME DNA damage-binding protein 1 OS=Drosophila melanogaster GN=pic PE=1 SV=1	1	5	5	126.04	1140	10.08	4.2	3.3	4.3	10637000	15558000	102270000
C9QP20;Q9VIU7	tr|C9QP20|C9QP20_DROME MIP13910p (Fragment) OS=Drosophila melanogaster GN=CG10166-RA PE=2 SV=1;sp|Q9VIU7|DPM1_DROME Probable dolichol-phosphate mannosyltransferase OS=Drosophila melanogaster GN=CG10166 PE=3 SV=1	2	7	7	27.89	248	54.416	16.5	33.9	43.5	10624000	127640000	211560000
Q86P48	sp|Q86P48|ATBP_DROME AT-rich binding protein OS=Drosophila melanogaster GN=ATbp PE=2 SV=2	1	1	1	42.598	388	-2	3.1	3.1	3.1	10595000	58174000	0
Q9VTZ0;M9PI44;M9PF14;M9PF20;M9PFB2;M9PCB7;M9PFF9;M9PFG3	tr|Q9VTZ0|Q9VTZ0_DROME GH08269p OS=Drosophila melanogaster GN=tral PE=1 SV=3;tr|M9PI44|M9PI44_DROME Trailer hitch, isoform F OS=Drosophila melanogaster GN=tral PE=1 SV=1;tr|M9PF14|M9PF14_DROME Trailer hitch, isoform C OS=Drosophila melanogaster GN=tral PE=	8	6	6	69.339	652	77.835	8.1	2	18.4	10583000	4784200	230070000
Q9GQV2;A0A0B4JCY6;Q7KSF4;A0A0B4KHN1;A0A0B4KGT8;Q9VEN1;Q8T3K7;Q29R34;Q6NN54;A0A0B4KGB3;C7LAD0;A4V310;C7LAD1;B7Z0L2	tr|Q9GQV2|Q9GQV2_DROME Filamin isoform A OS=Drosophila melanogaster GN=cher PE=4 SV=1;tr|A0A0B4JCY6|A0A0B4JCY6_DROME Cheerio, isoform I OS=Drosophila melanogaster GN=cher PE=1 SV=1;tr|Q7KSF4|Q7KSF4_DROME Cheerio, isoform G OS=Drosophila melanogaster GN=che	14	14	14	239.17	2210	44.279	3.5	1.6	7.7	10542000	9388500	208660000
Q9VT75	tr|Q9VT75|Q9VT75_DROME LD19812p OS=Drosophila melanogaster GN=vnc PE=1 SV=1	1	3	3	22.324	196	7.2844	11.2	16.8	16.8	10484000	41101000	88069000
O18404;D5A7S2	sp|O18404|HCD2_DROME 3-hydroxyacyl-CoA dehydrogenase type-2 OS=Drosophila melanogaster GN=scu PE=1 SV=1	2	5	5	26.905	255	21.143	16.9	35.7	16.9	10402000	64487000	57779000
Q9VWG1;Q8IQW5;M9NHC5;D2NUF4	tr|Q9VWG1|Q9VWG1_DROME LD37169p OS=Drosophila melanogaster GN=Dmel\CG14207 PE=1 SV=1;tr|Q8IQW5|Q8IQW5_DROME RE23625p OS=Drosophila melanogaster GN=Dmel\CG14207 PE=1 SV=1	4	3	3	20.841	183	24.113	32.2	10.4	32.2	10396000	2839600	51195000
A0A0C4FEI6;Q9VF28	tr|A0A0C4FEI6|A0A0C4FEI6_DROME Actin-related protein 2/3 complex subunit 3 OS=Drosophila melanogaster PE=2 SV=1;tr|Q9VF28|Q9VF28_DROME Actin-related protein 2/3 complex subunit 3 OS=Drosophila melanogaster GN=Arpc3A PE=1 SV=4	2	1	1	18.281	160	2.9667	13.1	13.1	13.1	10385000	16280000	24175000
Q9W4X9;Q8T9C2;H0RNN7	sp|Q9W4X9|ZW10_DROME Centromere/kinetochore protein zw10 OS=Drosophila melanogaster GN=Zw10 PE=1 SV=2	3	5	5	82.262	721	26.305	7.6	7.4	8.9	10349000	19750000	48518000
Q9VIQ8	tr|Q9VIQ8|Q9VIQ8_DROME Cytochrome c oxidase subunit 4, isoform A OS=Drosophila melanogaster GN=COX4 PE=1 SV=1	1	1	1	20.519	182	2.524	8.2	0	0	10284000	0	0
Q7K1C3	tr|Q7K1C3|Q7K1C3_DROME CG6984 OS=Drosophila melanogaster GN=CG6984 PE=1 SV=1	1	3	3	31.168	285	7.6829	13.3	10.2	6.7	10281000	18842000	11321000
P25160	sp|P25160|ARL1_DROME ADP-ribosylation factor-like protein 1 OS=Drosophila melanogaster GN=Arl1 PE=2 SV=5	1	3	3	20.247	180	8.8536	18.9	27.2	18.9	10260000	35450000	37520000
Q95TG6	tr|Q95TG6|Q95TG6_DROME SD07194p OS=Drosophila melanogaster GN=Not1 PE=2 SV=1	1	4	1	66.448	581	-2	5.9	3.1	3.1	10252000	49281000	0
Q7KLX3	tr|Q7KLX3|Q7KLX3_DROME GEO05407p1 OS=Drosophila melanogaster GN=Tapdelta PE=1 SV=1	1	3	3	17.601	166	7.6559	12.7	18.7	18.7	10202000	44724000	65030000
H5V8F3;Q9VN93	tr|H5V8F3|H5V8F3_DROME FI18603p1 OS=Drosophila melanogaster GN=CG12163-RB PE=2 SV=1;sp|Q9VN93|CPR1_DROME Putative cysteine proteinase CG12163 OS=Drosophila melanogaster GN=CG12163 PE=2 SV=2	2	3	3	53.545	475	7.9434	4.6	4.6	7.8	10195000	12071000	59377000
Q9VCW3;A1YK86;A1YK85;A1YK83;A1YK82;A1YK80;A1YK79;A1YK78;A1YK77;A1YK81	sp|Q9VCW3|NU133_DROME Nuclear pore complex protein Nup133 OS=Drosophila melanogaster GN=Nup133 PE=2 SV=2;tr|A1YK86|A1YK86_DROME Nup133 OS=Drosophila melanogaster GN=Nup133 PE=4 SV=1;tr|A1YK85|A1YK85_DROME Nup133 OS=Drosophila melanogaster GN=Nup133 PE=4 SV	10	12	12	135.14	1200	48.238	6	8.9	11.3	10167000	141410000	220610000
Q8IRJ9;Q8IGQ5;Q9W0U0	tr|Q8IRJ9|Q8IRJ9_DROME Glycerol kinase 1, isoform B OS=Drosophila melanogaster GN=Gk1 PE=1 SV=1;tr|Q8IGQ5|Q8IGQ5_DROME RE46914p OS=Drosophila melanogaster GN=Gk1 PE=2 SV=1;tr|Q9W0U0|Q9W0U0_DROME GH12641p OS=Drosophila melanogaster GN=Gk1 PE=1 SV=1	3	6	6	51.827	474	22.889	13.3	17.3	9.3	10081000	38116000	38200000
M9NFP2;A8JNN3;A8JNN2;A8JNN1;M9PHR5;M9NE45;Q6IDD9	tr|M9NFP2|M9NFP2_DROME Ectoderm-expressed 4, isoform J OS=Drosophila melanogaster GN=Ect4 PE=1 SV=1;tr|A8JNN3|A8JNN3_DROME Ectoderm-expressed 4, isoform H OS=Drosophila melanogaster GN=Ect4 PE=1 SV=1;tr|A8JNN2|A8JNN2_DROME Ectoderm-expressed 4, isoform G O	7	6	6	115.81	1059	89.655	6.6	2.7	9.3	10018000	3617200	56069000
B5RJ36;Q86BN8	tr|B5RJ36|B5RJ36_DROME FI07205p OS=Drosophila melanogaster GN=Plip-RB PE=2 SV=1;sp|Q86BN8|PTPM1_DROME Phosphatidylglycerophosphatase and protein-tyrosine phosphatase 1 OS=Drosophila melanogaster GN=PTPMT1 PE=2 SV=1	2	2	2	23.155	200	7.7871	17.5	17.5	17.5	9995900	14744000	21528000
Q8IMF5;P23226;A0A0B4KI71	tr|Q8IMF5|Q8IMF5_DROME Microtubule-associated protein 205, isoform B OS=Drosophila melanogaster GN=Map205 PE=1 SV=1;sp|P23226|MA205_DROME 205 kDa microtubule-associated protein OS=Drosophila melanogaster GN=Map205 PE=1 SV=2;tr|A0A0B4KI71|A0A0B4KI71_DROME M	3	11	11	126.67	1185	80.79	5.9	2.5	17	9988700	5817900	301120000
Q0KHZ6;Q8MR58	tr|Q0KHZ6|Q0KHZ6_DROME CG7834, isoform A OS=Drosophila melanogaster GN=CG 7834 PE=1 SV=1;tr|Q8MR58|Q8MR58_DROME GH14462p (Fragment) OS=Drosophila melanogaster GN=CG7834 PE=2 SV=1	2	5	5	27.217	253	9.2537	20.2	12.3	20.6	9987100	16608000	95276000
Q01637	sp|Q01637|UMPS_DROME Uridine 5-monophosphate synthase OS=Drosophila melanogaster GN=r-l PE=2 SV=2	1	4	4	53.419	493	7.8979	9.5	9.5	3.2	9920100	32150000	16062000
M9PJP0;Q9VXK0	tr|M9PJP0|M9PJP0_DROME Nipsnap, isoform F OS=Drosophila melanogaster GN=Nipsnap PE=4 SV=2;sp|Q9VXK0|NIPSN_DROME Protein NipSnap OS=Drosophila melanogaster GN=Nipsnap PE=2 SV=2	2	2	2	31.965	273	5.2907	9.2	9.2	9.2	9905600	28558000	34504000
Q8IML5;Q86M57;Q8IML3;Q8IML4;Q6NLA3;Q9XZ10;N0A2P0;Q86P41	tr|Q8IML5|Q8IML5_DROME V-type proton ATPase subunit a OS=Drosophila melanogaster GN=Vha100-1 PE=1 SV=1;tr|Q86M57|Q86M57_DROME V-type proton ATPase subunit a OS=Drosophila melanogaster GN=Vha100-1 PE=2 SV=1;tr|Q8IML3|Q8IML3_DROME V-type proton ATPase subuni	8	3	3	94.676	833	8.6987	4.2	4.2	4.2	9866100	14690000	30393000
M9PDA6;Q9VIK9	tr|M9PDA6|M9PDA6_DROME CG2614, isoform C OS=Drosophila melanogaster GN=38D.29 PE=4 SV=1;sp|Q9VIK9|MET13_DROME Methyltransferase-like protein 13 OS=Drosophila melanogaster GN=CG2614 PE=2 SV=1	2	5	5	75.533	669	25.215	9	9.3	11.7	9848700	18018000	70649000
Q7K569	tr|Q7K569|Q7K569_DROME Glycerol-3-phosphate dehydrogenase OS=Drosophila melanogaster GN=Gpo-1 PE=1 SV=1	1	5	5	80.421	724	14.446	7.6	8.1	9.9	9844400	24749000	59327000
Q9W2I2;Q8T3L8	tr|Q9W2I2|Q9W2I2_DROME CG9752 OS=Drosophila melanogaster GN=CG9752 PE=1 SV=1	2	4	4	39.545	343	10.12	7	5.2	9	9778300	18647000	58103000
Q9V3A7;Q9U6I2;Q9U9P6;Q867M1;B1PGE2;B1PGE1;B1PGD9;B1PGD8;B1PGD5;B1PGD4;B1PGD3;B1PGD2;B1PGD1;B1PGD0;B1PGC9;B1PGC8;B1PGC7;B1PGC5;B1PGC4;B1PGC3;B1PGC2;B1PGC0;B1PGB9;B1PGB8;B1PGB7;B1PGB6;B1PGB4;B1PGB3;B1PGB2;Q961A5	tr|Q9V3A7|Q9V3A7_DROME Structural maintenance of chromosomes protein OS=Drosophila melanogaster GN=glu PE=1 SV=1;tr|Q9U6I2|Q9U6I2_DROME Structural maintenance of chromosomes protein OS=Drosophila melanogaster GN=glu PE=2 SV=1;tr|Q9U9P6|Q9U9P6_DROME LD20207	30	10	10	159.88	1409	66.734	6	5.5	11.8	9746000	32234000	133320000
Q9V948;E1JGN7;Q7KA80;A1ZBW1;A1ZBW0;Q7KHL0;D3DMD1;A1ZBW3;Q8IGP8;A1ZBW4	tr|Q9V948|Q9V948_DROME HnRNP K protein homolog OS=Drosophila melanogaster GN=HnRNP-K PE=2 SV=3;tr|E1JGN7|E1JGN7_DROME Heterogeneous nuclear ribonucleoprotein K, isoform E OS=Drosophila melanogaster GN=HnRNP-K PE=1 SV=1;tr|Q7KA80|Q7KA80_DROME Heterogeneous	10	5	5	49.623	490	34.252	5.3	7.1	12	9693500	26162000	98685000
Q9VP77	tr|Q9VP77|Q9VP77_DROME LD23875p OS=Drosophila melanogaster GN=Dmel\CG10565 PE=1 SV=1	1	15	15	73.619	646	112.4	3.4	7.7	29.4	9685200	23653000	292630000
Q9VW57	tr|Q9VW57|Q9VW57_DROME Grasp65 OS=Drosophila melanogaster GN=Grasp65 PE=1 SV=1	1	2	2	47.723	460	6.4229	8.7	4.1	4.1	9674500	10397000	11786000
B7YZZ9;P27864	tr|B7YZZ9|B7YZZ9_DROME DNA-(apurinic or apyrimidinic site) lyase OS=Drosophila melanogaster GN=Rrp1 PE=1 SV=1;sp|P27864|RRP1_DROME Recombination repair protein 1 OS=Drosophila melanogaster GN=Rrp1 PE=1 SV=2	2	9	9	77.39	706	57.933	4.5	16.3	1	9671900	138540000	5936400
N0A733;Q9V4S8	tr|N0A733|N0A733_DROME FI20803p1 OS=Drosophila melanogaster GN=CSN7-RA PE=2 SV=1;sp|Q9V4S8|CSN7_DROME COP9 signalosome complex subunit 7 OS=Drosophila melanogaster GN=CSN7 PE=1 SV=2	2	3	3	31.067	278	7.7277	9.7	18.3	14.7	9656700	46680000	19421000
Q9VHS0;Q8MZ20	tr|Q9VHS0|Q9VHS0_DROME CG9601 OS=Drosophila melanogaster GN=PNKP PE=1 SV=2;tr|Q8MZ20|Q8MZ20_DROME RE13646p OS=Drosophila melanogaster GN=CG9601 PE=2 SV=1	2	1	1	58.567	523	2.0076	1.7	1.7	1.7	9650800	39108000	56797000
Q9W3N9	tr|Q9W3N9|Q9W3N9_DROME LD24105p OS=Drosophila melanogaster GN=154229_at PE=1 SV=1	1	2	2	43.47	410	10.892	5.9	11	11	9633500	46261000	78868000
Q9VCB6;Q7K112;Q8MTZ5;Q8IMX1;Q8IMX0	tr|Q9VCB6|Q9VCB6_DROME AT23187p OS=Drosophila melanogaster GN=twin PE=1 SV=2;tr|Q7K112|Q7K112_DROME LD18435p OS=Drosophila melanogaster GN=twin PE=1 SV=1;tr|Q8MTZ5|Q8MTZ5_DROME CCR4 (Fragment) OS=Drosophila melanogaster GN=twin PE=2 SV=1;tr|Q8IMX1|Q8IMX1_D	5	5	5	62.382	545	10.334	7.9	7.5	6.1	9585800	22436000	23827000
Q8T8Q1;A1Z6H6	tr|Q8T8Q1|Q8T8Q1_DROME SD07787p OS=Drosophila melanogaster GN=CG7791 PE=2 SV=1;tr|A1Z6H6|A1Z6H6_DROME CG7791 OS=Drosophila melanogaster GN=CG7791 PE=1 SV=1	2	8	8	80.236	699	20.795	10.2	8.3	8.9	9533200	34392000	93928000
M9PFN1;Q9V3K3	tr|M9PFN1|M9PFN1_DROME RuvB-like helicase OS=Drosophila melanogaster GN=rept PE=3 SV=1;sp|Q9V3K3|RUVB2_DROME RuvB-like helicase 2 OS=Drosophila melanogaster GN=rept PE=1 SV=1	2	6	6	53.541	481	11.611	9.6	13.1	13.1	9480900	87809000	117320000
Q8T6B9;A4V193	sp|Q8T6B9|PUF68_DROME Poly(U)-binding-splicing factor half pint OS=Drosophila melanogaster GN=pUf68 PE=1 SV=2;tr|A4V193|A4V193_DROME Half pint, isoform D OS=Drosophila melanogaster GN=hfp PE=1 SV=1	2	6	6	67.939	637	27.337	5.7	9.6	9.7	9468600	40453000	107220000
Q9VV51;D5AEK7;Q961F9	tr|Q9VV51|Q9VV51_DROME CG4729, isoform A OS=Drosophila melanogaster GN=Dmel\CG4729 PE=1 SV=1;tr|D5AEK7|D5AEK7_DROME CG4729, isoform E OS=Drosophila melanogaster GN=Dmel\CG4729 PE=1 SV=1;tr|Q961F9|Q961F9_DROME CG4729, isoform D OS=Drosophila melanogaster GN	3	2	2	44.397	386	7.9416	8.3	8.3	8.3	9415100	31236000	44724000
P45888;F6J178	sp|P45888|ARP2_DROME Actin-related protein 2 OS=Drosophila melanogaster GN=Arp2 PE=2 SV=3;tr|F6J178|F6J178_DROME CG9901 (Fragment) OS=Drosophila melanogaster GN=CG9901 PE=3 SV=1	2	3	3	45.282	399	38.683	5.8	7.5	7.5	9339200	42979000	153480000
Q9GQ87;Q9W541;O46090	tr|Q9GQ87|Q9GQ87_DROME Eukaryotic initiation factor eIF2B epsilon subunit OS=Drosophila melanogaster GN=eIF2Bepsilon PE=2 SV=1;tr|Q9W541|Q9W541_DROME LD41433p OS=Drosophila melanogaster GN=eIF2Bepsilon PE=1 SV=1;tr|O46090|O46090_DROME EG:86E4.1 protein OS=	3	5	5	74.836	668	15.079	5.8	5.8	9.6	9302800	17454000	79159000
Q9W4K8;Q8MQN6	tr|Q9W4K8|Q9W4K8_DROME CG3626 OS=Drosophila melanogaster GN=Dmel\CG3626 PE=1 SV=3;tr|Q8MQN6|Q8MQN6_DROME RE39339p OS=Drosophila melanogaster GN=CG3626 PE=2 SV=1	2	5	5	106.33	939	7.8242	5.3	2.9	5.1	9288800	4674900	61403000
M9NFA7;Q9VX91	tr|M9NFA7|M9NFA7_DROME Ubr1 ubiquitin ligase, isoform B OS=Drosophila melanogaster GN=Ubr1 PE=4 SV=1;sp|Q9VX91|UBR1_DROME E3 ubiquitin-protein ligase UBR1 OS=Drosophila melanogaster GN=Ubr1 PE=2 SV=2	2	5	5	208.36	1824	13.263	4.4	2.4	4.4	9287700	7140400	60023000
Q9VZ20;Q8IR93	tr|Q9VZ20|Q9VZ20_DROME Dynein light intermediate chain, isoform A OS=Drosophila melanogaster GN=Dlic PE=1 SV=2;tr|Q8IR93|Q8IR93_DROME Dynein light intermediate chain, isoform B OS=Drosophila melanogaster GN=Dlic PE=1 SV=1	2	5	5	54.457	493	24.534	12.4	0	17.8	9281600	0	64080000
A0A0B4LI86;P08266	tr|A0A0B4LI86|A0A0B4LI86_DROME DNA-directed RNA polymerase subunit beta OS=Drosophila melanogaster GN=RpII140 PE=3 SV=1;sp|P08266|RPB2_DROME DNA-directed RNA polymerase II subunit RPB2 OS=Drosophila melanogaster GN=RpII140 PE=2 SV=2	2	12	12	134.04	1176	30.676	4.5	10.6	7.8	9276700	101890000	85940000
X2JBC1;Q9VYS3	tr|X2JBC1|X2JBC1_DROME Upf1, isoform B OS=Drosophila melanogaster GN=Upf1 PE=4 SV=1;sp|Q9VYS3|RENT1_DROME Regulator of nonsense transcripts 1 homolog OS=Drosophila melanogaster GN=Upf1 PE=1 SV=2	2	6	6	129.91	1180	10.871	4.5	1.7	5.3	9266600	6179300	58776000
E8NH46;A0A0B4K6D2;Q9VH95	tr|E8NH46|E8NH46_DROME MIP29050p OS=Drosophila melanogaster GN=CG16817-RA PE=2 SV=1;tr|A0A0B4K6D2|A0A0B4K6D2_DROME Uncharacterized protein, isoform B OS=Drosophila melanogaster GN=Dmel\CG16817 PE=1 SV=1;sp|Q9VH95|YC17_DROME Uncharacterized protein CG16817	3	4	4	20.722	184	16.69	13	13	16.3	9174900	33753000	91897000
A0A0B4K812;Q7KNS3	tr|A0A0B4K812|A0A0B4K812_DROME Lissencephaly-1 homolog OS=Drosophila melanogaster GN=Lis-1 PE=3 SV=1;sp|Q7KNS3|LIS1_DROME Lissencephaly-1 homolog OS=Drosophila melanogaster GN=Lis-1 PE=1 SV=2	2	6	6	46.459	411	43.685	10.2	15.1	12.9	9149400	77769000	127230000
Q9VD22	tr|Q9VD22|Q9VD22_DROME LP02352p OS=Drosophila melanogaster GN=Dmel\CG18596 PE=1 SV=2	1	5	5	130.19	1136	19.128	6.2	5.1	5.1	9149100	20448000	63568000
Q9W0L7;M9PDK3	tr|Q9W0L7|Q9W0L7_DROME LD28815p OS=Drosophila melanogaster GN=Usp10 PE=1 SV=2;tr|M9PDK3|M9PDK3_DROME Ubiquitin specific protease 10, isoform B OS=Drosophila melanogaster GN=Usp10 PE=1 SV=1	2	6	6	164.69	1517	104.15	2	1.1	5.3	9112700	7715800	129720000
Q9VU28;Q8T8X0;B5RJP8	tr|Q9VU28|Q9VU28_DROME Malate dehydrogenase OS=Drosophila melanogaster GN=Dmel\CG10748 PE=3 SV=1;tr|Q8T8X0|Q8T8X0_DROME Malate dehydrogenase OS=Drosophila melanogaster GN=CG10748 PE=2 SV=1;tr|B5RJP8|B5RJP8_DROME Malate dehydrogenase (Fragment) OS=Drosophil	3	2	2	36.783	349	2.8743	3.2	3.2	6.6	9072500	31719000	84018000
Q9VIW7	sp|Q9VIW7|RTCB_DROME tRNA-splicing ligase RtcB homolog OS=Drosophila melanogaster GN=RtcB PE=2 SV=1	1	4	4	55.916	506	14.033	8.7	14.8	8.7	8990000	59460000	64282000
E1JH01;Q9V345	tr|E1JH01|E1JH01_DROME COP9 signalosome subunit 4, isoform B OS=Drosophila melanogaster GN=CSN4 PE=1 SV=1;sp|Q9V345|CSN4_DROME COP9 signalosome complex subunit 4 OS=Drosophila melanogaster GN=CSN4 PE=1 SV=1	2	3	3	46.473	407	20.763	10.6	6.6	6.6	8966200	6925500	34924000
Q8MZI3;Q7KU78;Q8T0I3	tr|Q8MZI3|Q8MZI3_DROME GH10652p OS=Drosophila melanogaster GN=BcDNA:HL01868 PE=1 SV=1;tr|Q7KU78|Q7KU78_DROME Uncharacterized protein, isoform C OS=Drosophila melanogaster GN=BcDNA:HL01868 PE=1 SV=1	3	11	9	88.209	818	27.93	7.7	1.6	18	8946200	0	247340000
Q6NP57;Q2Q3W1;Q2Q3W0;Q2Q3V9;Q2Q3V7;Q2Q3V6;Q2Q3V5;Q2Q3V4;A0A0B4LFK8;Q95YG3;A1ZAW0;Q2Q3V8	tr|Q6NP57|Q6NP57_DROME SD11113p (Fragment) OS=Drosophila melanogaster GN=Dcr-2-RA PE=2 SV=2;tr|Q2Q3W1|Q2Q3W1_DROME Dicer-2 (Fragment) OS=Drosophila melanogaster GN=Dcr-2 PE=3 SV=1;tr|Q2Q3W0|Q2Q3W0_DROME Dicer-2 (Fragment) OS=Drosophila melanogaster GN=Dcr-	12	14	14	195.24	1701	40.071	5.2	6.2	11.5	8930900	58055000	127160000
Q9VCA5	sp|Q9VCA5|SYFB_DROME Phenylalanine--tRNA ligase beta subunit OS=Drosophila melanogaster GN=beta-PheRS PE=1 SV=1	1	8	8	65.777	589	34.801	10.4	16.3	15.6	8866900	73625000	135130000
Q86BY9	sp|Q86BY9|RIG_DROME Protein rigor mortis OS=Drosophila melanogaster GN=rig PE=1 SV=1	1	5	5	137.83	1235	20.173	5.5	6.4	4.9	8848100	52244000	63347000
Q9VSL9	tr|Q9VSL9|Q9VSL9_DROME CG6638 OS=Drosophila melanogaster GN=Dmel\CG6638 PE=1 SV=1	1	3	3	46.195	420	10.037	5.5	2.9	7.9	8741500	7967000	25871000
Q9VQZ0;A0APR8	tr|Q9VQZ0|Q9VQZ0_DROME Protein YIPF OS=Drosophila melanogaster GN=Dmel\CG3652 PE=1 SV=2;tr|A0APR8|A0APR8_DROME Protein YIPF OS=Drosophila melanogaster GN=CG3652 PE=3 SV=1	2	1	1	24.92	224	8.3441	11.6	11.6	0	8736800	13321000	0
E1JIK0;P48810	tr|E1JIK0|E1JIK0_DROME Heterogeneous nuclear ribonucleoprotein at 87F, isoform C OS=Drosophila melanogaster GN=Hrb87F PE=1 SV=1;sp|P48810|RB87F_DROME Heterogeneous nuclear ribonucleoprotein 87F OS=Drosophila melanogaster GN=Hrb87F PE=2 SV=2	2	4	3	39.499	385	7.3482	7.5	10.1	4.2	8735900	28343000	48700000
A0A0B4KFW0;Q8T0S6	tr|A0A0B4KFW0|A0A0B4KFW0_DROME Hippo, isoform B OS=Drosophila melanogaster GN=hpo PE=4 SV=1;sp|Q8T0S6|HIPPO_DROME Serine/threonine-protein kinase hippo OS=Drosophila melanogaster GN=hpo PE=1 SV=1	2	4	4	75.109	669	17.864	7.6	1.9	7.6	8730100	3163100	71726000
A0A0B4KFX5;A0A0B4KGG9;A4V2S3;A0A0B4KHB2;A0A0B4KFT4;A0A0B4KGZ7;O46036;E8NH65	tr|A0A0B4KFX5|A0A0B4KFX5_DROME C-terminal binding protein, isoform I OS=Drosophila melanogaster GN=CtBP PE=1 SV=1;tr|A0A0B4KGG9|A0A0B4KGG9_DROME C-terminal binding protein, isoform F OS=Drosophila melanogaster GN=CtBP PE=1 SV=1;tr|A4V2S3|A4V2S3_DROME C-ter	8	4	4	41.344	379	8.1713	8.2	7.4	5	8717000	28895000	22765000
Q8IQN2;Q8MQK2;Q9VUY1;C9QP60	tr|Q8IQN2|Q8IQN2_DROME Chloride channel protein OS=Drosophila melanogaster GN=ClC-c PE=3 SV=1;tr|Q8MQK2|Q8MQK2_DROME Chloride channel protein (Fragment) OS=Drosophila melanogaster GN=ClC-c PE=2 SV=1;tr|Q9VUY1|Q9VUY1_DROME Chloride channel protein OS=Drosop	4	8	8	90.546	822	31.141	5.8	1.2	10	8711600	6446700	207400000
Q9VAJ1	tr|Q9VAJ1|Q9VAJ1_DROME Condensin complex subunit 1 OS=Drosophila melanogaster GN=Cap-D2 PE=1 SV=1	1	6	6	157.5	1380	13.532	3.6	4.8	4.9	8682400	31523000	37790000
Q9VG23;Q86PF4	tr|Q9VG23|Q9VG23_DROME GH22994p OS=Drosophila melanogaster GN=CT28495 PE=1 SV=2;tr|Q86PF4|Q86PF4_DROME GH08978p OS=Drosophila melanogaster GN=CT28495 PE=1 SV=2	2	4	4	24.394	215	11.613	19.1	16.3	13.5	8660100	37274000	33762000
Q9VWS1	tr|Q9VWS1|Q9VWS1_DROME CG6617 OS=Drosophila melanogaster GN=anon-EST:Posey180 PE=1 SV=1	1	3	3	25.996	225	11.118	19.1	19.1	17.3	8657100	15788000	32121000
M9PCF8;Q9VUC6;I0B8L8;E8NH76	tr|M9PCF8|M9PCF8_DROME Formin-like, isoform D OS=Drosophila melanogaster GN=Frl PE=1 SV=1;sp|Q9VUC6|Y2138_DROME Formin-like protein CG32138 OS=Drosophila melanogaster GN=CG32138 PE=1 SV=3;tr|I0B8L8|I0B8L8_DROME MIP35420p1 (Fragment) OS=Drosophila melanogas	4	4	4	124.97	1113	21.053	4.1	3.2	5.3	8573400	9638000	57159000
Q94901	sp|Q94901|LARK_DROME RNA-binding protein lark OS=Drosophila melanogaster GN=lark PE=1 SV=1	1	5	5	39.911	352	13.929	10.8	6.2	14.8	8568500	9901900	121970000
Q9Y114;E8NH00	tr|Q9Y114|Q9Y114_DROME BcDNA.GH10229 OS=Drosophila melanogaster GN=anon-WO0140519.245 PE=1 SV=1;tr|E8NH00|E8NH00_DROME AT10981p OS=Drosophila melanogaster GN=CG8042-RB PE=2 SV=1	2	3	3	71.204	656	5.7685	5.3	5.3	5.3	8542200	12641000	36797000
A0A0B4JD24;A0A0B4JCR9;Q7JQT8	tr|A0A0B4JD24|A0A0B4JD24_DROME Uncharacterized protein, isoform C OS=Drosophila melanogaster GN=CG17002 PE=1 SV=1;tr|A0A0B4JCR9|A0A0B4JCR9_DROME Uncharacterized protein, isoform D OS=Drosophila melanogaster GN=CG17002 PE=1 SV=1;tr|Q7JQT8|Q7JQT8_DROME LD414	3	10	10	44.4	404	110.99	9.2	0	35.1	8486700	0	484820000
H1ZYE3;Q94533;P91656;Q8SWT5	tr|H1ZYE3|H1ZYE3_DROME RPS6-p70-protein kinase (Fragment) OS=Drosophila melanogaster GN=S6k PE=3 SV=1;tr|Q94533|Q94533_DROME Ribosomal protein S6 kinase OS=Drosophila melanogaster GN=S6k PE=1 SV=2;tr|P91656|P91656_DROME Ribosomal protein S6 kinase OS=Droso	4	5	5	44.895	395	20.369	10.4	7.1	19.2	8460600	9459700	68673000
P06604	sp|P06604|TBA2_DROME Tubulin alpha-2 chain OS=Drosophila melanogaster GN=alphaTub85E PE=1 SV=1	1	16	1	49.966	449	-2	36.5	35.4	40.8	8458300	0	43541000
Q8T4C9	tr|Q8T4C9|Q8T4C9_DROME AT03632p OS=Drosophila melanogaster GN=BcDNA:AT03632 PE=1 SV=1	1	4	4	22.413	193	8.0649	13.5	13.5	18.7	8430200	26065000	78406000
Q9VHN5	sp|Q9VHN5|UNC50_DROME Protein unc-50 homolog OS=Drosophila melanogaster GN=CG9773 PE=2 SV=1	1	1	1	32.472	275	9.5047	6.5	6.5	6.5	8396900	19337000	19210000
Q8MT06	sp|Q8MT06|GNL3_DROME Guanine nucleotide-binding protein-like 3 homolog OS=Drosophila melanogaster GN=Ns1 PE=1 SV=2	1	7	7	65.984	581	25.041	9.3	7.2	15.3	8384100	21678000	173210000
Q7K126	tr|Q7K126|Q7K126_DROME LD13864p OS=Drosophila melanogaster GN=Not3 PE=1 SV=1	1	4	4	92.367	844	24.125	5.2	2.3	6.8	8353700	5691900	67289000
Q8IQQ4	tr|Q8IQQ4|Q8IQQ4_DROME Uncharacterized protein OS=Drosophila melanogaster GN=Dmel\CG33052 PE=1 SV=1	1	1	1	37.707	338	-2	5.9	5.9	5.9	8283700	131340000	91333000
I1V501;Q94517	tr|I1V501|I1V501_DROME Histone deacetylase OS=Drosophila melanogaster GN=Rpd3 PE=3 SV=1;sp|Q94517|HDAC1_DROME Histone deacetylase Rpd3 OS=Drosophila melanogaster GN=Rpd3 PE=1 SV=2	2	4	4	57.125	521	6.8671	5.8	5.8	7.3	8215000	42578000	61607000
Q9VVV7;Q95R49;B5RIS0	tr|Q9VVV7|Q9VVV7_DROME CG3808 OS=Drosophila melanogaster GN=Dmel\CG3808 PE=1 SV=3;tr|Q95R49|Q95R49_DROME SD08036p OS=Drosophila melanogaster GN=CG3808 PE=2 SV=1;tr|B5RIS0|B5RIS0_DROME FI05218p (Fragment) OS=Drosophila melanogaster PE=2 SV=1	3	5	5	68.614	615	15.521	8.6	14.6	13.2	8213100	56600000	67315000
Q7K4L8	tr|Q7K4L8|Q7K4L8_DROME CG7878 OS=Drosophila melanogaster GN=DmRH26 PE=1 SV=1	1	7	7	78.567	703	20.053	2.4	4	14.8	8188100	11629000	209540000
P53034	sp|P53034|RFC2_DROME Replication factor C subunit 2 OS=Drosophila melanogaster GN=RfC4 PE=1 SV=1	1	6	6	37.173	331	22.509	16.3	15.4	19	8174800	26679000	37491000
Q8SYJ7;Q9VAQ0	tr|Q8SYJ7|Q8SYJ7_DROME RE55959p OS=Drosophila melanogaster GN=Cul5 PE=2 SV=1;tr|Q9VAQ0|Q9VAQ0_DROME Cullin 5 OS=Drosophila melanogaster GN=Cul5 PE=1 SV=1	2	6	6	74.366	636	13.907	7.9	6.9	8.5	8153000	22840000	47089000
Q9VWL0	tr|Q9VWL0|Q9VWL0_DROME Mec2 OS=Drosophila melanogaster GN=Mec2 PE=1 SV=1	1	2	2	38.667	350	4.5114	8	0	8	8149100	0	0
Q6IG95	tr|Q6IG95|Q6IG95_DROME HDC06907 OS=Drosophila melanogaster GN=HDC06907 PE=4 SV=1	1	1	1	7.2433	65	-2	16.9	16.9	16.9	8128200	5717400	53642000
A0A0B4KHS9;P12982;P48461;C0MKX3;B4F4X2;Q05547;Q95V52;Q95V51;Q5K375;Q5LJN2;A8QI94;Q9VQL9;Q6NNT3	tr|A0A0B4KHS9|A0A0B4KHS9_DROME Serine/threonine-protein phosphatase OS=Drosophila melanogaster GN=Pp1alpha-96A PE=3 SV=1;sp|P12982|PP12_DROME Serine/threonine-protein phosphatase alpha-2 isoform OS=Drosophila melanogaster GN=Pp1-87B PE=1 SV=1;sp|P48461|PP1	13	5	4	37.37	327	36.362	13.5	9.2	18.3	8112100	19359000	80841000
A0A0B4KHJ5;D5SHR2;Q9VFC8	tr|A0A0B4KHJ5|A0A0B4KHJ5_DROME Glycogen [starch] synthase OS=Drosophila melanogaster GN=GlyS PE=1 SV=1;tr|D5SHR2|D5SHR2_DROME Glycogen [starch] synthase OS=Drosophila melanogaster GN=CG6904-RA PE=2 SV=1;sp|Q9VFC8|GYS_DROME Glycogen [starch] synthase OS=Dro	3	9	9	79.233	689	34.282	7.3	9.6	16.4	8110600	67547000	136360000
Q9VCC2	tr|Q9VCC2|Q9VCC2_DROME CG5510 OS=Drosophila melanogaster GN=Dmel\CG5510 PE=1 SV=1	1	4	4	37.639	329	13.502	12.5	16.4	7.9	8081100	31019000	21774000
A1ZAS3;Q8MQK4	tr|A1ZAS3|A1ZAS3_DROME Uridine kinase OS=Drosophila melanogaster GN=l(2)k01209 PE=1 SV=1;tr|Q8MQK4|Q8MQK4_DROME Uridine kinase OS=Drosophila melanogaster GN=l(2)k01209 PE=1 SV=1	2	3	3	63.012	561	9.0875	3.7	2.3	6.2	8078500	9031800	111920000
B6IDT4;X2JC55;H9ZJM9;F3YDP2;P56079	tr|B6IDT4|B6IDT4_DROME Phosphatidate cytidylyltransferase OS=Drosophila melanogaster GN=CdsA-RA PE=2 SV=1;tr|X2JC55|X2JC55_DROME Phosphatidate cytidylyltransferase OS=Drosophila melanogaster GN=CdsA PE=1 SV=1;tr|H9ZJM9|H9ZJM9_DROME Phosphatidate cytidylylt	5	1	1	48.673	420	8.3718	5	5	5	8053300	14692000	28464000
Q9VL70;Q9NIU5	tr|Q9VL70|Q9VL70_DROME HL08109p OS=Drosophila melanogaster GN=yip2 PE=1 SV=1	2	3	3	41.61	398	16.709	6.3	6.3	12.8	8026700	19071000	116200000
Q9VR89	sp|Q9VR89|PNO1_DROME RNA-binding protein pno1 OS=Drosophila melanogaster GN=l(1)G0004 PE=2 SV=1	1	4	4	26.676	240	20.707	12.1	12.1	22.9	8025700	14808000	105010000
Q9VN77	tr|Q9VN77|Q9VN77_DROME LD31216p OS=Drosophila melanogaster GN=PTAR3 PE=1 SV=1	1	4	4	59.793	515	10.116	6	9.3	11.1	7935800	47838000	123270000
Q9VXV6;Q9NHD7	tr|Q9VXV6|Q9VXV6_DROME Secretory carrier-associated membrane protein OS=Drosophila melanogaster GN=Scamp PE=1 SV=1;tr|Q9NHD7|Q9NHD7_DROME Secretory carrier-associated membrane protein OS=Drosophila melanogaster GN=Scamp PE=2 SV=1	2	2	2	38.543	343	11.442	10.2	10.2	10.2	7920900	30416000	32023000
M9PEB9;M9PB20;Q9VQL0;Q32KC0	tr|M9PEB9|M9PEB9_DROME Uncharacterized protein, isoform C OS=Drosophila melanogaster GN=Dmel\CG17258 PE=4 SV=1;tr|M9PB20|M9PB20_DROME Uncharacterized protein, isoform D OS=Drosophila melanogaster GN=Dmel\CG17258 PE=4 SV=1;tr|Q9VQL0|Q9VQL0_DROME Uncharacter	4	1	1	103.57	873	1.9827	0.9	0.9	0.9	7916200	35316000	19078000
Q9VYV3	sp|Q9VYV3|TXND5_DROME Thioredoxin domain-containing protein 5 homolog OS=Drosophila melanogaster GN=prtp PE=1 SV=2	1	3	3	46.65	416	5.433	7.7	2.6	0	7882600	2883700	0
Q9VIP9;P91663	tr|Q9VIP9|Q9VIP9_DROME Condensin complex subunit 2 OS=Drosophila melanogaster GN=barr PE=1 SV=1;tr|P91663|P91663_DROME Condensin complex subunit 2 OS=Drosophila melanogaster GN=barr PE=2 SV=1	2	4	4	82.761	735	9.6136	8.3	4.5	6.1	7874800	9595600	78555000
Q9U916;Q53YH3;P29413	tr|Q9U916|Q9U916_DROME Calreticulin OS=Drosophila melanogaster GN=Calr PE=2 SV=1;tr|Q53YH3|Q53YH3_DROME Calreticulin, isoform B OS=Drosophila melanogaster GN=Calr PE=1 SV=1;sp|P29413|CALR_DROME Calreticulin OS=Drosophila melanogaster GN=Crc PE=1 SV=2	3	1	1	46.809	406	7.9763	6.2	0	0	7868500	0	0
X2JGP4;P54399	tr|X2JGP4|X2JGP4_DROME Protein disulfide-isomerase OS=Drosophila melanogaster GN=Pdi PE=3 SV=1;sp|P54399|PDI_DROME Protein disulfide-isomerase OS=Drosophila melanogaster GN=Pdi PE=2 SV=1	2	5	5	55.78	496	9.7611	9.5	15.5	5.2	7839900	22924000	22613000
Q9NH01;Q9VFW4;Q6NP11	tr|Q9NH01|Q9NH01_DROME DID OS=Drosophila melanogaster GN=poly PE=2 SV=1;tr|Q9VFW4|Q9VFW4_DROME MIP09035p OS=Drosophila melanogaster GN=poly PE=1 SV=1;tr|Q6NP11|Q6NP11_DROME LD12690p (Fragment) OS=Drosophila melanogaster GN=did PE=2 SV=1	3	4	4	27.899	251	41.33	19.9	17.9	25.5	7826600	58707000	110200000
Q7PLS8	sp|Q7PLS8|INT3_DROME Integrator complex subunit 3 OS=Drosophila melanogaster GN=IntS3 PE=1 SV=1	1	5	5	123.95	1068	13.173	3.3	3	6.2	7817800	9339400	36200000
Q8IPF5;Q9U7E6;Q9VLL3;Q86BM5;Q8SY32;Q9U7E7	tr|Q8IPF5|Q8IPF5_DROME A kinase anchor protein 200, isoform B OS=Drosophila melanogaster GN=Akap200 PE=1 SV=1;tr|Q9U7E6|Q9U7E6_DROME Delta-A kinase anchor protein 200 OS=Drosophila melanogaster GN=Akap200 PE=2 SV=1;tr|Q9VLL3|Q9VLL3_DROME A kinase anchor pr	6	3	3	38.168	372	13.773	13.4	13.4	8.9	7772300	15227000	28336000
Q9VIG1;Q95RG7	tr|Q9VIG1|Q9VIG1_DROME FI12406p OS=Drosophila melanogaster GN=l(2)05287 PE=1 SV=2;tr|Q95RG7|Q95RG7_DROME LD30416p OS=Drosophila melanogaster GN=l(2)05287 PE=2 SV=1	2	5	5	120.01	1071	19.241	3.1	4.5	1.7	7689300	18166000	12656000
Q9VRL1;Q8IGH9	tr|Q9VRL1|Q9VRL1_DROME GEO06356p1 OS=Drosophila melanogaster GN=Uev1A PE=1 SV=1;tr|Q8IGH9|Q8IGH9_DROME RH13862p (Fragment) OS=Drosophila melanogaster GN=Uev1A PE=2 SV=1	2	2	2	16.669	145	4.8538	8.3	15.2	15.2	7678800	59715000	113550000
A0A1B2AJC2;Q9VI10	tr|A0A1B2AJC2|A0A1B2AJC2_DROME GEO05036p1 (Fragment) OS=Drosophila melanogaster PE=2 SV=1;sp|Q9VI10|SMD2_DROME Probable small nuclear ribonucleoprotein Sm D2 OS=Drosophila melanogaster GN=SmD2 PE=1 SV=1	2	3	3	13.504	119	10.344	16	24.4	16	7664300	65720000	56402000
E1JJ73;O97067	tr|E1JJ73|E1JJ73_DROME CG1307, isoform C OS=Drosophila melanogaster GN=BG:DS00004.12 PE=1 SV=1;sp|O97067|PTH2_DROME Probable peptidyl-tRNA hydrolase 2 OS=Drosophila melanogaster GN=CG1307 PE=2 SV=2	2	3	3	19.873	186	12.514	13.4	21.5	21.5	7642700	30407000	31864000
Q9VAH9	sp|Q9VAH9|INT11_DROME Integrator complex subunit 11 OS=Drosophila melanogaster GN=IntS11 PE=1 SV=1	1	4	4	67.591	597	7.5149	5.9	7.5	7.5	7600200	48865000	120620000
Q7K332	tr|Q7K332|Q7K332_DROME GH17623p OS=Drosophila melanogaster GN=CG3364 PE=2 SV=1	1	3	3	27.611	239	5.8816	8.4	12.6	12.6	7597500	18992000	39974000
Q9VUV9	sp|Q9VUV9|U520_DROME Putative U5 small nuclear ribonucleoprotein 200 kDa helicase OS=Drosophila melanogaster GN=l(3)72Ab PE=2 SV=4	1	18	18	244.51	2142	72.666	1.9	10.5	7.2	7560900	195330000	187170000
A0A0B4LGA7;P27091	tr|A0A0B4LGA7|A0A0B4LGA7_DROME Glass bottom boat, isoform B OS=Drosophila melanogaster GN=gbb PE=3 SV=1;sp|P27091|60A_DROME Protein 60A OS=Drosophila melanogaster GN=gbb PE=1 SV=1	2	3	3	51.687	455	19.154	5.7	7.7	5.7	7541700	30858000	31937000
Q9I7S8;F0JAN1	sp|Q9I7S8|PUR6_DROME Multifunctional protein ADE2 OS=Drosophila melanogaster GN=ade5 PE=2 SV=2;tr|F0JAN1|F0JAN1_DROME Ade5, isoform B OS=Drosophila melanogaster GN=ade5 PE=1 SV=1	2	6	6	47.281	429	13.73	11.9	8.2	9.6	7517900	37553000	62576000
A0A0B4KG41;Q9VES1	tr|A0A0B4KG41|A0A0B4KG41_DROME Uncharacterized protein, isoform B OS=Drosophila melanogaster GN=Arl6IP1 PE=4 SV=1;sp|Q9VES1|AR6P1_DROME ARL-6-interacting protein 1 homolog OS=Drosophila melanogaster GN=CG10326 PE=2 SV=1	2	1	1	22.233	197	3.1839	7.6	7.6	0	7501700	13824000	0
Q9VE85;B5RJQ1;Q8SYC6	tr|Q9VE85|Q9VE85_DROME Nucleoporin 43kD OS=Drosophila melanogaster GN=Nup43 PE=1 SV=1;tr|B5RJQ1|B5RJQ1_DROME FI09332p (Fragment) OS=Drosophila melanogaster GN=CG7671-RA PE=2 SV=1;tr|Q8SYC6|Q8SYC6_DROME RE68083p OS=Drosophila melanogaster GN=Nup43 PE=2 SV=1	3	3	3	40.148	358	76.395	8.9	12	8.9	7483100	36595000	26146000
Q9W3Y3	tr|Q9W3Y3|Q9W3Y3_DROME CG3226 OS=Drosophila melanogaster GN=Q9W3Y3 PE=1 SV=1	1	2	2	25.783	230	5.1717	10.9	10.9	10.9	7475700	17466000	15045000
Q8SX88;Q9VRV8;Q86PD5;O76331	tr|Q8SX88|Q8SX88_DROME LD12333p OS=Drosophila melanogaster GN=Tnpo PE=2 SV=1;tr|Q9VRV8|Q9VRV8_DROME FI21453p1 OS=Drosophila melanogaster GN=Tnpo PE=1 SV=1;tr|Q86PD5|Q86PD5_DROME RE59670p OS=Drosophila melanogaster GN=Tnpo PE=2 SV=1;tr|O76331|O76331_DROME T	4	3	3	73.028	642	7.1514	6.5	8.3	6.5	7465800	11840000	19215000
O44116;A1Z6S6;Q8T996;Q86LF4;A1Z6S7;Q9V3N4;Q9U999	tr|O44116|O44116_DROME Vimar OS=Drosophila melanogaster GN=vimar PE=2 SV=1;tr|A1Z6S6|A1Z6S6_DROME RE54322p OS=Drosophila melanogaster GN=vimar PE=1 SV=1;tr|Q8T996|Q8T996_DROME SD10607p OS=Drosophila melanogaster GN=vimar PE=2 SV=1;tr|Q86LF4|Q86LF4_DROME RE	7	5	5	70.237	634	8.9177	6.6	4.7	5.7	7456300	10528000	21331000
P20028	sp|P20028|RPA2_DROME DNA-directed RNA polymerase I subunit RPA2 OS=Drosophila melanogaster GN=RpI135 PE=1 SV=2	1	6	6	128.44	1129	21.266	3.1	7.5	7.5	7417400	65799000	73823000
Q7K3D4	tr|Q7K3D4|Q7K3D4_DROME Peptidylprolyl isomerase OS=Drosophila melanogaster GN=CG5482 PE=1 SV=1	1	5	5	44.861	397	11.681	13.1	18.1	11.3	7345000	47888000	114030000
D2NUK9;Q9U3Z7	tr|D2NUK9|D2NUK9_DROME Hoi-polloi, isoform B OS=Drosophila melanogaster GN=hoip PE=1 SV=1;sp|Q9U3Z7|NH2L1_DROME NHP2-like protein 1 homolog OS=Drosophila melanogaster GN=hoip PE=2 SV=1	2	2	2	13.883	127	8.9539	18.9	18.9	9.4	7338200	11043000	7386800
E2QD63;Q86DS1;C4NYP8	tr|E2QD63|E2QD63_DROME Hsc/Hsp70-interacting protein related, isoform B OS=Drosophila melanogaster GN=HIP-R PE=4 SV=1;sp|Q86DS1|F10A2_DROME Hsc70-interacting protein 2 OS=Drosophila melanogaster GN=HIP-R PE=1 SV=2;sp|C4NYP8|F10A1_DROME Hsc70-interacting pr	3	3	3	41.036	377	7.3257	6.4	6.4	7.4	7318600	19694000	41849000
M9PGW2;M9MSJ7;Q9W081	tr|M9PGW2|M9PGW2_DROME Uncharacterized protein, isoform E OS=Drosophila melanogaster GN=Dmel\CG42676 PE=4 SV=1;tr|M9MSJ7|M9MSJ7_DROME Uncharacterized protein, isoform C OS=Drosophila melanogaster GN=Dmel\CG42676 PE=4 SV=1;tr|Q9W081|Q9W081_DROME AT01075p OS	3	2	2	10.132	86	2.3974	29.1	0	0	7296900	0	0
P17917;Q868I9	sp|P17917|PCNA_DROME Proliferating cell nuclear antigen OS=Drosophila melanogaster GN=PCNA PE=1 SV=2;tr|Q868I9|Q868I9_DROME PCNA (Fragment) OS=Drosophila melanogaster GN=PCNA PE=4 SV=1	2	2	2	28.83	260	7.0001	3.1	8.1	8.1	7229400	90823000	86115000
Q8MSW6;Q9XYF7;Q9VAJ2;O76523	tr|Q8MSW6|Q8MSW6_DROME LD23540p OS=Drosophila melanogaster GN=Bub3 PE=2 SV=1;tr|Q9XYF7|Q9XYF7_DROME WD-40 repeat protein OS=Drosophila melanogaster GN=Bub3 PE=2 SV=1;tr|Q9VAJ2|Q9VAJ2_DROME Bub3, isoform A OS=Drosophila melanogaster GN=Bub3 PE=1 SV=1;tr|O76	4	3	3	37.514	323	12.258	6.5	6.5	9.3	7227400	26710000	96449000
Q8IN02	tr|Q8IN02|Q8IN02_DROME BcDNA.LD12153 OS=Drosophila melanogaster GN=Dph5 PE=1 SV=2	1	2	2	31.619	281	4.0933	13.5	13.5	13.5	7218400	14097000	30222000
T2GFI6;Q960E6;Q0E993;A0A0B4KF06	tr|T2GFI6|T2GFI6_DROME FI22042p1 OS=Drosophila melanogaster GN=Aats-val-RA PE=2 SV=1;tr|Q960E6|Q960E6_DROME SD04748p OS=Drosophila melanogaster GN=ValRS PE=2 SV=1;tr|Q0E993|Q0E993_DROME Valyl-tRNA synthetase, isoform A OS=Drosophila melanogaster GN=ValRS P	4	11	11	118.28	1049	57.87	3.6	5.9	11.6	7195000	17875000	189620000
B8A403;A0A0B4KHB7;B8A3Z2;Q9VCF4;Q9GQM8	tr|B8A403|B8A403_DROME AP complex subunit sigma OS=Drosophila melanogaster GN=AP-1sigma PE=2 SV=1;tr|A0A0B4KHB7|A0A0B4KHB7_DROME AP complex subunit sigma OS=Drosophila melanogaster GN=AP-1sigma PE=3 SV=1;tr|B8A3Z2|B8A3Z2_DROME AP complex subunit sigma OS=D	5	2	2	18.51	157	76.944	5.7	17.8	17.8	7104000	26210000	37029000
Q961S9;Q9VIH3	tr|Q961S9|Q961S9_DROME SD01502p OS=Drosophila melanogaster GN=Mtp PE=2 SV=1;tr|Q9VIH3|Q9VIH3_DROME Microsomal triacylglycerol transfer protein OS=Drosophila melanogaster GN=Mtp PE=1 SV=2	2	7	7	98.89	886	17.033	4.7	7.9	9	7077500	42620000	95812000
Q8IQP2;Q9VV89;D2NUJ2	tr|Q8IQP2|Q8IQP2_DROME Coat protein (Coatomer) zeta, isoform C OS=Drosophila melanogaster GN=zetaCOP PE=1 SV=1;tr|Q9VV89|Q9VV89_DROME Coat protein (Coatomer) zeta, isoform A OS=Drosophila melanogaster GN=zetaCOP PE=1 SV=2;tr|D2NUJ2|D2NUJ2_DROME MIP01145p (	3	1	1	18.697	163	15.635	11.7	11.7	11.7	7075100	24663000	40339000
E1JJN1;P35128;Q9VJS5	tr|E1JJN1|E1JJN1_DROME Bendless, isoform B OS=Drosophila melanogaster GN=ben PE=1 SV=1;sp|P35128|UBE2N_DROME Ubiquitin-conjugating enzyme E2 N OS=Drosophila melanogaster GN=ben PE=1 SV=1;tr|Q9VJS5|Q9VJS5_DROME AT16033p OS=Drosophila melanogaster GN=BG:DS01	3	2	2	17.236	151	4.31	5.3	11.9	11.9	7060700	34665000	42733000
Q960C7;A1Z729;C1C590;Q7JYX2;Q8MZG9;Q7JUS1	tr|Q960C7|Q960C7_DROME SD07613p OS=Drosophila melanogaster GN=CG2064 PE=2 SV=1;tr|A1Z729|A1Z729_DROME CG2064 OS=Drosophila melanogaster GN=CG2064 PE=1 SV=1;tr|C1C590|C1C590_DROME FI07747p (Fragment) OS=Drosophila melanogaster GN=CG2064-RA PE=2 SV=1	6	5	5	36.591	330	11.379	9.1	12.4	11.2	7042500	21794000	52136000
Q9V3H2	sp|Q9V3H2|PSDE_DROME 26S proteasome non-ATPase regulatory subunit 14 OS=Drosophila melanogaster GN=Rpn11 PE=1 SV=1	1	2	2	34.4	308	4.3119	4.2	6.5	6.5	7034900	27855000	74480000
Q8IPZ5;Q9VQJ6	tr|Q8IPZ5|Q8IPZ5_DROME CG9641, isoform B OS=Drosophila melanogaster GN=Dmel\CG9641 PE=1 SV=1;tr|Q9VQJ6|Q9VQJ6_DROME CG9641, isoform A OS=Drosophila melanogaster GN=Dmel\CG9641 PE=1 SV=1	2	3	3	49.998	443	10.244	3.2	5.4	8.6	7000800	8907100	78731000
Q9VIK1	tr|Q9VIK1|Q9VIK1_DROME Transmembrane 9 superfamily member OS=Drosophila melanogaster GN=TM9SF2 PE=1 SV=1	1	1	1	74.64	659	2.5951	1.4	1.4	1.4	6960200	8299400	11018000
Q86NS4;A1Z7H3;Q8T3L1;A1Z7H2;A0A0B4KFE4;Q960I0;H1UUA9	tr|Q86NS4|Q86NS4_DROME RH17880p OS=Drosophila melanogaster GN=l(2)44DEa PE=2 SV=1;tr|A1Z7H3|A1Z7H3_DROME Acyl-CoA synthetase long-chain, isoform C OS=Drosophila melanogaster GN=Acsl PE=1 SV=1;tr|Q8T3L1|Q8T3L1_DROME Acyl-CoA synthetase long-chain, isoform A	7	5	5	79.482	707	35.385	3.4	4.8	8.5	6959700	32486000	68780000
Q9VPQ7;A7KX20;A7KX19	tr|Q9VPQ7|Q9VPQ7_DROME SD07518p OS=Drosophila melanogaster GN=Spp PE=1 SV=1;tr|A7KX20|A7KX20_DROME Signal peptide peptidase OS=Drosophila melanogaster GN=spp PE=4 SV=1;tr|A7KX19|A7KX19_DROME Signal peptide peptidase OS=Drosophila melanogaster GN=spp PE=4 S	3	2	2	43.214	389	4.0692	4.6	4.6	4.6	6897200	25745000	54119000
Q8INK5;Q961T8	tr|Q8INK5|Q8INK5_DROME Defective proboscis extension response 5, isoform B OS=Drosophila melanogaster GN=dpr5 PE=4 SV=1;tr|Q961T8|Q961T8_DROME Defective proboscis extension response 5, isoform A OS=Drosophila melanogaster GN=dpr5 PE=1 SV=1	2	1	1	33.225	298	2.6292	2.3	2.3	2.3	6890900	21512000	24379000
Q9VFF0	tr|Q9VFF0|Q9VFF0_DROME GH01077p OS=Drosophila melanogaster GN=UQCR-C1 PE=1 SV=2	1	3	3	51.874	470	15.413	5.3	10	5.3	6878200	39061000	60690000
A8JV18;Q9VXE6;A1YKB1;A1YKA8;A1YKA5;A1YKA3;A1YKA1;A1YKA7;Q95SX4;Q960L2	tr|A8JV18|A8JV18_DROME Nucleoporin 153kD, isoform D OS=Drosophila melanogaster GN=Nup153 PE=1 SV=1;sp|Q9VXE6|NU153_DROME Nuclear pore complex protein Nup153 OS=Drosophila melanogaster GN=Nup153 PE=1 SV=4;tr|A1YKB1|A1YKB1_DROME Nup153 (Fragment) OS=Drosophi	10	5	5	201.23	1929	19.802	1.5	0	5.2	6870700	0	73807000
X2JAF1;Q8MSS1	tr|X2JAF1|X2JAF1_DROME Lava lamp, isoform D OS=Drosophila melanogaster GN=lva PE=4 SV=1;sp|Q8MSS1|LVA_DROME Protein lava lamp OS=Drosophila melanogaster GN=lva PE=1 SV=2	2	26	26	315.9	2779	231.48	0.8	12.8	15	6854300	156450000	381630000
Q9VHC0	tr|Q9VHC0|Q9VHC0_DROME LD23870p OS=Drosophila melanogaster GN=RnpS1 PE=1 SV=2	1	2	2	41.848	374	8.5632	3.7	0	5.9	6834100	0	61011000
P25991	sp|P25991|SUF_DROME Protein suppressor of forked OS=Drosophila melanogaster GN=su(f) PE=1 SV=2	1	10	10	88.213	765	36.333	6.7	12.2	15.8	6754100	77807000	205050000
Q7K485	tr|Q7K485|Q7K485_DROME CathD OS=Drosophila melanogaster GN=cathD PE=1 SV=1	1	5	5	42.472	392	16.233	15.1	19.4	14.3	6747800	49749000	70041000
O18338;M9NEE8;D5AEN5	tr|O18338|O18338_DROME LD44762p OS=Drosophila melanogaster GN=Rab8 PE=1 SV=1;tr|M9NEE8|M9NEE8_DROME Rab8, isoform B OS=Drosophila melanogaster GN=Rab8 PE=1 SV=1;tr|D5AEN5|D5AEN5_DROME MIP21873p (Fragment) OS=Drosophila melanogaster GN=Rab8-RA PE=2 SV=1	3	3	2	23.691	207	6.9559	19.3	19.3	19.3	6708000	12079000	32715000
P25171	sp|P25171|RCC1_DROME Regulator of chromosome condensation OS=Drosophila melanogaster GN=Rcc1 PE=1 SV=2	1	5	5	58.85	547	20.307	9	10.6	13.7	6698400	46703000	34386000
Q8SX76	tr|Q8SX76|Q8SX76_DROME LD24646p OS=Drosophila melanogaster GN=pch2 PE=1 SV=1	1	3	3	46.563	421	23.419	7.6	7.6	13.8	6685900	7398400	46388000
P29613;K7Z7Z8	sp|P29613|TPIS_DROME Triosephosphate isomerase OS=Drosophila melanogaster GN=Tpi PE=1 SV=3	2	5	5	26.625	247	15.214	13.4	18.6	28.7	6671400	39522000	178650000
C0PPK6	tr|C0PPK6|C0PPK6_DROME MIP06396p OS=Drosophila melanogaster PE=2 SV=1	1	1	1	8.9562	73	-2	31.5	31.5	31.5	6569900	18299000	38167000
Q9VZE6	sp|Q9VZE6|BRX1_DROME Ribosome biogenesis protein BRX1 homolog OS=Drosophila melanogaster GN=CG11583 PE=2 SV=2	1	4	4	41.618	359	21.546	8.4	14.8	8.4	6555100	49298000	46493000
Q9U1H9	sp|Q9U1H9|NXF1_DROME Nuclear RNA export factor 1 OS=Drosophila melanogaster GN=sbr PE=1 SV=2	1	11	11	76.248	672	33.118	7.4	11.8	16.4	6532800	46581000	73376000
Q24439;Q8INE6	sp|Q24439|ATPO_DROME ATP synthase subunit O, mitochondrial OS=Drosophila melanogaster GN=ATPsynO PE=2 SV=2	2	3	3	22.422	209	10.865	17.2	17.2	17.2	6501500	7409100	30878000
Q9VQI5	tr|Q9VQI5|Q9VQI5_DROME LP04564p OS=Drosophila melanogaster GN=Dmel\CG31694 PE=1 SV=2	1	3	3	47.327	425	47.382	7.5	9.6	9.6	6483700	35287000	78028000
Q9VT60;Q7KUD4;Q29R25;Q8MR13	tr|Q9VT60|Q9VT60_DROME Calcium-independent phospholipase A2 VIA, isoform A OS=Drosophila melanogaster GN=iPLA2-VIA PE=1 SV=3;tr|Q7KUD4|Q7KUD4_DROME Calcium-independent phospholipase A2 VIA, isoform B OS=Drosophila melanogaster GN=iPLA2-VIA PE=1 SV=1;tr|Q29	4	5	5	96.862	877	7.7683	4.8	3.9	3.9	6483600	8898900	20147000
X2JEM4;Q9W334	tr|X2JEM4|X2JEM4_DROME GEO07185p1 OS=Drosophila melanogaster GN=RpS28b PE=2 SV=1;sp|Q9W334|RS28_DROME 40S ribosomal protein S28 OS=Drosophila melanogaster GN=RpS28b PE=1 SV=2	2	3	3	7.4766	65	7.0099	13.8	32.3	46.2	6483500	19719000	145470000
Q9V9W7;O96695	tr|Q9V9W7|Q9V9W7_DROME Rough deal OS=Drosophila melanogaster GN=rod PE=1 SV=2;tr|O96695|O96695_DROME Rough deal protein OS=Drosophila melanogaster GN=rod PE=4 SV=1	2	8	8	239.69	2089	30.111	4.4	3.1	4.3	6478700	17073000	45560000
M9PJM7;Q6NNU5;P54362;M9PHJ5;D3DMP9;D6W4T4	tr|M9PJM7|M9PJM7_DROME AP-3 complex subunit delta OS=Drosophila melanogaster GN=g PE=1 SV=1;tr|Q6NNU5|Q6NNU5_DROME AP-3 complex subunit delta OS=Drosophila melanogaster GN=g PE=2 SV=1;sp|P54362|AP3D_DROME AP-3 complex subunit delta OS=Drosophila melanogast	6	3	3	106.99	967	9.1919	3.5	3.5	2.4	6456900	10611000	23055000
C1C3C7;Q8T9F6;B6IDV6;Q8T4M0;E1JHB8;Q7KTI7;M9PCJ1;M9MRE1;Q8T4L8;Q7KTI8;Q9VLQ8;Q95P10;Q8IPG1;E1JHB6;M9PCX2;E1JHB7;C4IXZ5	tr|C1C3C7|C1C3C7_DROME MIP03027p OS=Drosophila melanogaster GN=Pvr-RF PE=2 SV=1;tr|Q8T9F6|Q8T9F6_DROME SD03187p OS=Drosophila melanogaster GN=Pvr PE=2 SV=1;tr|B6IDV6|B6IDV6_DROME PDGF-and VEGF-receptor related, isoform G OS=Drosophila melanogaster GN=Pvr P	17	3	3	137.25	1216	8.2951	4	1.2	0	6454100	0	0
Q94516	sp|Q94516|AT5F1_DROME ATP synthase subunit b, mitochondrial OS=Drosophila melanogaster GN=ATPsynB PE=2 SV=2	1	2	2	27.357	243	3.4429	9.1	9.1	4.5	6410300	11040000	9217100
Q8MZ44;Q7KM04;Q94888;Q7KM08;Q7KM05;C8VUZ5;Q9XTK9;Q7KM03;C9QP46;M9PE01;F0JAN8;E1JIR3;M9PG50;P23573;Q9VP22	tr|Q8MZ44|Q8MZ44_DROME LD27880p OS=Drosophila melanogaster GN=Eip63E PE=2 SV=1;tr|Q7KM04|Q7KM04_DROME Ecdysone-induced protein 63E, isoform H OS=Drosophila melanogaster GN=Eip63E PE=2 SV=1;tr|Q94888|Q94888_DROME Serine/threonine protein kinase OS=Drosophil	15	2	1	42.309	367	2.9439	4.4	2.2	2.2	6404500	1793400	5210400
Q9VZF1	tr|Q9VZF1|Q9VZF1_DROME CG1309 OS=Drosophila melanogaster GN=Dmel\CG1309 PE=1 SV=1	1	5	5	58.402	524	27.831	9.2	9.2	12.6	6400600	23676000	41536000
A0A0B4KFR1;Q9VGR7	tr|A0A0B4KFR1|A0A0B4KFR1_DROME CG6693, isoform B OS=Drosophila melanogaster GN=Dmel\CG6693 PE=4 SV=1;sp|Q9VGR7|Y6693_DROME J domain-containing protein CG6693 OS=Drosophila melanogaster GN=CG6693 PE=1 SV=1	2	4	4	34.889	299	17.907	9.4	13	18.7	6318700	49622000	35596000
M9PH59;Q9VXX8	tr|M9PH59|M9PH59_DROME Ribosomal protein L37 OS=Drosophila melanogaster GN=RpL37a PE=2 SV=1;sp|Q9VXX8|RL371_DROME Probable 60S ribosomal protein L37-A OS=Drosophila melanogaster GN=RpL37a PE=1 SV=1	2	3	3	10.643	93	6.4854	21.5	29	29	6291400	249800000	225390000
Q9VJC7	sp|Q9VJC7|EFTS_DROME Elongation factor Ts, mitochondrial OS=Drosophila melanogaster GN=mEFTs PE=2 SV=1	1	2	2	35.412	318	4.3904	13.5	7.2	13.5	6289500	8747500	16856000
Q8IR23;Q8T9B1	tr|Q8IR23|Q8IR23_DROME GH13542p OS=Drosophila melanogaster GN=vap PE=2 SV=2;tr|Q8T9B1|Q8T9B1_DROME SD09318p OS=Drosophila melanogaster GN=vap PE=2 SV=1	2	4	4	107.95	954	9.8107	2.5	0.9	5.2	6269400	9453300	32180000
A0A0B4LFW6;A1Z7S0;C7LAD8;Q6NP12	tr|A0A0B4LFW6|A0A0B4LFW6_DROME Receptor mediated endocytosis 8, isoform B OS=Drosophila melanogaster GN=Rme-8 PE=1 SV=1;tr|A1Z7S0|A1Z7S0_DROME Receptor mediated endocytosis 8, isoform A OS=Drosophila melanogaster GN=Rme-8 PE=1 SV=1;tr|C7LAD8|C7LAD8_DROME L	4	8	8	272.47	2407	23.85	1.9	3.7	4.9	6264200	22093000	85100000
Q9VKB2;Q8MS15	tr|Q9VKB2|Q9VKB2_DROME Ced-12 OS=Drosophila melanogaster GN=Ced-12 PE=1 SV=1;tr|Q8MS15|Q8MS15_DROME RE62284p OS=Drosophila melanogaster GN=Ced-12 PE=2 SV=1	2	7	7	82.976	724	15.868	3.6	1.8	12	6262600	4702300	88158000
Q9W0M7;Q5BI86;M9PDJ8;Q8T9L6	tr|Q9W0M7|Q9W0M7_DROME FI04459p OS=Drosophila melanogaster GN=Sf3b3 PE=1 SV=2;tr|Q5BI86|Q5BI86_DROME RE01065p OS=Drosophila melanogaster GN=Sf3b3 PE=2 SV=1;tr|M9PDJ8|M9PDJ8_DROME Uncharacterized protein, isoform C OS=Drosophila melanogaster GN=Sf3b3 PE=1 S	4	2	2	136.61	1227	2.7319	2	0	1.1	6240500	0	10660000
Q9VTB0	tr|Q9VTB0|Q9VTB0_DROME CG8003, isoform A OS=Drosophila melanogaster GN=Dmel\CG8003 PE=1 SV=1	1	3	3	45.768	407	6.3374	5.2	5.2	8.1	6237900	21164000	58289000
A0A1B2AKP8;Q9VLM5	tr|A0A1B2AKP8|A0A1B2AKP8_DROME Dolichyl-diphosphooligosaccharide--protein glycosyltransferase subunit DAD1 (Fragment) OS=Drosophila melanogaster PE=2 SV=1;sp|Q9VLM5|DAD1_DROME Dolichyl-diphosphooligosaccharide--protein glycosyltransferase subunit DAD1 OS=D	2	3	3	12.526	112	12.807	26.8	17.9	17.9	6204400	21455000	32162000
A0A0B4LF57;P62152	tr|A0A0B4LF57|A0A0B4LF57_DROME Calmodulin, isoform C OS=Drosophila melanogaster GN=Cam PE=1 SV=1;sp|P62152|CALM_DROME Calmodulin OS=Drosophila melanogaster GN=Cam PE=1 SV=2	2	1	1	16.81	149	5.7837	8.7	0	8.7	6174500	0	0
Q7JVW9;Q9V428	tr|Q7JVW9|Q7JVW9_DROME LD43891p OS=Drosophila melanogaster GN=ics PE=2 SV=1;tr|Q9V428|Q9V428_DROME Icarus, isoform A OS=Drosophila melanogaster GN=ics PE=1 SV=2	2	3	3	30.717	272	5.8997	9.6	5.1	8.5	6113100	13355000	32681000
Q9N6D7;Q8MZ09;A0A0B4KG96;Q9NDU2;Q9NDU1	tr|Q9N6D7|Q9N6D7_DROME FI03258p OS=Drosophila melanogaster GN=hrg PE=1 SV=1;tr|Q8MZ09|Q8MZ09_DROME RE25878p OS=Drosophila melanogaster GN=hrg PE=2 SV=1;tr|A0A0B4KG96|A0A0B4KG96_DROME Hiiragi, isoform D OS=Drosophila melanogaster GN=hrg PE=1 SV=1;tr|Q9NDU2|	5	3	3	74.529	659	9.4809	3.3	4.2	5.8	6112200	14954000	37822000
A4V2K7;P22058	tr|A4V2K7|A4V2K7_DROME D1 chromosomal protein, isoform C OS=Drosophila melanogaster GN=D1 PE=1 SV=1;sp|P22058|CPD1_DROME Chromosomal protein D1 OS=Drosophila melanogaster GN=D1 PE=1 SV=3	2	4	4	37	355	10.869	7.3	11.8	0	6111200	78394000	0
M9NE68;P02516	tr|M9NE68|M9NE68_DROME Heat shock protein 23, isoform B OS=Drosophila melanogaster GN=Hsp23 PE=3 SV=1;sp|P02516|HSP23_DROME Heat shock protein 23 OS=Drosophila melanogaster GN=Hsp23 PE=2 SV=2	2	3	3	20.629	186	10.534	8.1	29.6	16.1	6073500	165610000	105890000
Q7K0F7	tr|Q7K0F7|Q7K0F7_DROME Carbonyl reductase, isoform A OS=Drosophila melanogaster GN=CG11200 PE=1 SV=1	1	4	4	39.643	355	9.4676	9.6	12.1	12.1	6056700	41241000	55249000
Q9VG96	sp|Q9VG96|GSTD4_DROME Glutathione S-transferase D4 OS=Drosophila melanogaster GN=GstD4 PE=1 SV=1	1	1	1	24.736	215	8.7713	9.8	9.8	9.8	6027900	13764000	29370000
X2JEA3;Q8MV48	tr|X2JEA3|X2JEA3_DROME Polypeptide N-acetylgalactosaminyltransferase OS=Drosophila melanogaster GN=GalNAc-T2 PE=3 SV=1;sp|Q8MV48|GALT7_DROME N-acetylgalactosaminyltransferase 7 OS=Drosophila melanogaster GN=GalNAc-T2 PE=2 SV=2	2	3	3	68.332	591	4.8251	3.7	3.7	6.3	5998300	18969000	19183000
Q9VGZ3;Q9NFX2;C7LA95;O76935;B5T1X5;B5T1X0	tr|Q9VGZ3|Q9VGZ3_DROME Iron regulatory protein 1B OS=Drosophila melanogaster GN=Irp-1B PE=1 SV=1;tr|Q9NFX2|Q9NFX2_DROME Iron regulatory protein 1B OS=Drosophila melanogaster GN=Irp-1B PE=2 SV=1;tr|C7LA95|C7LA95_DROME FI05817p (Fragment) OS=Drosophila melan	6	22	15	98.577	899	80.845	5	10.3	32.9	5995100	51274000	798680000
Q9VZE4	tr|Q9VZE4|Q9VZE4_DROME CG1316 OS=Drosophila melanogaster GN=Dmel\CG1316 PE=1 SV=2	1	3	3	52.452	470	13.843	5.3	3.8	8.7	5969900	10086000	104700000
Q5BHU7;Q95X10;A1Z7P1;Q86NU8;Q95RR7	tr|Q5BHU7|Q5BHU7_DROME AT01222p (Fragment) OS=Drosophila melanogaster GN=Pmm45A PE=2 SV=1;tr|Q95X10|Q95X10_DROME Phosphomannomutase 45A OS=Drosophila melanogaster GN=Pmm45A PE=2 SV=1;tr|A1Z7P1|A1Z7P1_DROME Phosphomannomutase 45A OS=Drosophila melanogaster	5	4	4	65.72	586	18.386	7.7	7.7	7.7	5921200	9890200	31420000
M9PBP5;Q9VQ57	tr|M9PBP5|M9PBP5_DROME Derlin OS=Drosophila melanogaster GN=Der-1 PE=3 SV=1;sp|Q9VQ57|DERL1_DROME Derlin-1 OS=Drosophila melanogaster GN=Der-1 PE=2 SV=1	2	2	2	28.256	245	8.0181	7.8	13.1	5.3	5916400	22363000	7454300
Q9W0P3	sp|Q9W0P3|MED30_DROME Mediator of RNA polymerase II transcription subunit 30 OS=Drosophila melanogaster GN=MED30 PE=1 SV=1	1	1	1	35.301	318	3.8934	3.8	3.8	0	5901600	17132000	0
O96692;Q95SU2;A0A0B4LGJ4	tr|O96692|O96692_DROME RE63021p OS=Drosophila melanogaster GN=Rap2l PE=1 SV=1;tr|Q95SU2|Q95SU2_DROME SD07888p OS=Drosophila melanogaster GN=Rap2l PE=2 SV=1;tr|A0A0B4LGJ4|A0A0B4LGJ4_DROME Ras-associated protein 2-like, isoform C OS=Drosophila melanogaster G	3	2	2	20.45	182	5.2373	12.6	12.6	12.6	5899300	12881000	26105000
F7VJU9	tr|F7VJU9|F7VJU9_DROME RT11843p (Fragment) OS=Drosophila melanogaster GN=ranshi-RA PE=2 SV=1	1	1	1	41.262	351	-2	2.6	2.6	2.6	5895500	14859000	20742000
O76863	tr|O76863|O76863_DROME EG:100G10.3 protein OS=Drosophila melanogaster GN=eIF2Bbeta PE=1 SV=1	1	2	2	39.154	352	6.6343	8.5	4.8	8.5	5890500	12809000	35758000
Q9W3Q0;Q8SYS5;F6J915	tr|Q9W3Q0|Q9W3Q0_DROME FI07418p OS=Drosophila melanogaster GN=Rab39 PE=2 SV=1;tr|Q8SYS5|Q8SYS5_DROME RE37651p OS=Drosophila melanogaster GN=Rab39 PE=2 SV=1;tr|F6J915|F6J915_DROME CG12156 (Fragment) OS=Drosophila melanogaster GN=CG12156 PE=4 SV=1	3	3	2	24.704	218	4.9728	14.2	9.6	14.2	5867400	17356000	27214000
P51406	sp|P51406|BYS_DROME Bystin OS=Drosophila melanogaster GN=bys PE=1 SV=2	1	4	4	49.966	436	9.8691	6.4	2.5	10.6	5847000	0	39296000
Q9W4A0;O18337	tr|Q9W4A0|Q9W4A0_DROME GH11193p OS=Drosophila melanogaster GN=Rab18 PE=1 SV=1;tr|O18337|O18337_DROME Rab-related protein 4 OS=Drosophila melanogaster GN=Rab18 PE=2 SV=1	2	1	1	22.064	197	2.0952	6.6	6.6	6.6	5807400	3576000	7160200
Q9VSN9;Q6IDG2	tr|Q9VSN9|Q9VSN9_DROME GM04779p OS=Drosophila melanogaster GN=SrpRbeta PE=1 SV=2;tr|Q6IDG2|Q6IDG2_DROME RE55992p (Fragment) OS=Drosophila melanogaster PE=2 SV=1	2	5	5	27.088	244	17.267	10.7	18.4	19.3	5780000	22203000	59958000
Q9VZS1	tr|Q9VZS1|Q9VZS1_DROME LD28127p OS=Drosophila melanogaster GN=PP2C PE=1 SV=1	1	2	2	41.009	371	3.0827	5.4	0	5.4	5778700	0	19958000
Q9VLS9	sp|Q9VLS9|LACB2_DROME Beta-lactamase-like protein 2 homolog OS=Drosophila melanogaster GN=CG12375 PE=2 SV=1	1	1	1	32.733	292	-2	3.1	3.1	3.1	5750200	7932500	14960000
Q8MT58;A0A0B4LEQ0;E8NHA0	tr|Q8MT58|Q8MT58_DROME RE11562p OS=Drosophila melanogaster GN=CG17337 PE=1 SV=1;tr|A0A0B4LEQ0|A0A0B4LEQ0_DROME Uncharacterized protein, isoform C OS=Drosophila melanogaster GN=CG17337 PE=1 SV=1	3	6	6	53.163	478	14.318	6.9	11.1	13	5740500	36000000	133410000
A0A0B4LEY6;Q94518	tr|A0A0B4LEY6|A0A0B4LEY6_DROME Nascent polypeptide associated complex protein alpha subunit, isoform D OS=Drosophila melanogaster GN=Nacalpha PE=4 SV=1;sp|Q94518|NACA_DROME Nascent polypeptide-associated complex subunit alpha OS=Drosophila melanogaster GN=	2	3	3	23.021	217	20.649	6.9	16.1	12.9	5733000	60561000	39724000
E1JGZ9;Q9XZJ4	tr|E1JGZ9|E1JGZ9_DROME Proteasome subunit alpha type OS=Drosophila melanogaster GN=CG30382 PE=1 SV=1;sp|Q9XZJ4|PSA6_DROME Proteasome subunit alpha type-6 OS=Drosophila melanogaster GN=Prosalpha1 PE=1 SV=2	2	4	4	27.162	244	11.279	5.3	14.3	14.3	5703200	16069000	127940000
Q8MT64;Q7KUW6;Q9VX26;X2JE77	tr|Q8MT64|Q8MT64_DROME RE02873p OS=Drosophila melanogaster GN=chas PE=2 SV=1;tr|Q7KUW6|Q7KUW6_DROME Chascon, isoform B OS=Drosophila melanogaster GN=chas PE=4 SV=1;tr|Q9VX26|Q9VX26_DROME Chascon, isoform A OS=Drosophila melanogaster GN=chas PE=4 SV=2;tr|X2	4	1	1	116.46	1031	-2	1	0	0	5695200	0	0
Q9NGY8;Q9NGY7;Q9NGY9;A4V4C1;C9QPE1;M9NGA3;M9NDU6;M9PHA6;P08182	tr|Q9NGY8|Q9NGY8_DROME Casein kinase II beta subunit (Fragment) OS=Drosophila melanogaster GN=CkIIbeta PE=2 SV=1;tr|Q9NGY7|Q9NGY7_DROME Casein kinase II beta subunit (Fragment) OS=Drosophila melanogaster GN=CkIIbeta PE=2 SV=1;tr|Q9NGY9|Q9NGY9_DROME Casein	9	2	2	7.31	62	43.159	48.4	48.4	48.4	5678900	12609000	74846000
Q9V3D8;Q9NHV8;Q8IH82;A0A0C4FEI8	tr|Q9V3D8|Q9V3D8_DROME GH27579p OS=Drosophila melanogaster GN=grsm PE=1 SV=1;tr|Q9NHV8|Q9NHV8_DROME Putative cytoplasmic aminopeptidase OS=Drosophila melanogaster GN=grsm PE=2 SV=1;tr|Q8IH82|Q8IH82_DROME AT31511p OS=Drosophila melanogaster GN=grsm PE=2 SV=	4	3	3	60.169	558	5.5794	7.2	5	2.2	5670500	19990000	0
Q7K172	tr|Q7K172|Q7K172_DROME LD04933p OS=Drosophila melanogaster GN=ste24a PE=1 SV=1	1	4	4	51.639	451	12.749	8	11.5	8.9	5669300	64030000	62141000
Q8T994;Q6NN82;Q9W1H3	tr|Q8T994|Q8T994_DROME SD10857p OS=Drosophila melanogaster GN=Upf3 PE=2 SV=1;tr|Q6NN82|Q6NN82_DROME AT18503p OS=Drosophila melanogaster GN=CG11184 PE=2 SV=1;tr|Q9W1H3|Q9W1H3_DROME FI21285p1 OS=Drosophila melanogaster GN=Upf3 PE=1 SV=2	3	2	2	50.964	450	5.4268	2.2	2	2	5640500	6864500	9013800
Q9VGH5;Q8IG99;Q8INJ6	tr|Q9VGH5|Q9VGH5_DROME AT27789p OS=Drosophila melanogaster GN=glo PE=1 SV=1;tr|Q8IG99|Q8IG99_DROME SD14463p OS=Drosophila melanogaster GN=glo PE=2 SV=1	3	5	5	61.396	586	10.374	9	5.5	7.3	5613700	13330000	12243000
Q9W423	tr|Q9W423|Q9W423_DROME LD18904p OS=Drosophila melanogaster GN=schlank PE=1 SV=2	1	1	1	46.35	400	2.843	2.8	2.8	2.8	5609100	23683000	23368000
Q9V5P6	sp|Q9V5P6|NOP10_DROME H/ACA ribonucleoprotein complex subunit 3 OS=Drosophila melanogaster GN=CG7637 PE=2 SV=1	1	2	2	7.6337	64	5.5703	20.3	42.2	20.3	5588400	42765000	28063000
Q9VH81	tr|Q9VH81|Q9VH81_DROME GH12714p OS=Drosophila melanogaster GN=PpD3 PE=1 SV=1	1	2	2	59.263	520	5.144	5.4	2.9	2.9	5585000	7347200	24443000
B7YZI0;Q9V7N5	tr|B7YZI0|B7YZI0_DROME Vacuolar H[+] ATPase 44kD subunit, isoform F OS=Drosophila melanogaster GN=Vha44 PE=1 SV=1;sp|Q9V7N5|VATC_DROME V-type proton ATPase subunit C OS=Drosophila melanogaster GN=Vha44 PE=2 SV=5	2	2	2	92.389	836	4.5816	3	3	3	5558700	14100000	19276000
Q9W1H5;Q52KA4	tr|Q9W1H5|Q9W1H5_DROME Decapping protein 1, isoform A OS=Drosophila melanogaster GN=DCP1 PE=1 SV=1;tr|Q52KA4|Q52KA4_DROME GH04763p (Fragment) OS=Drosophila melanogaster GN=CG11183 PE=2 SV=1	2	5	5	41.359	372	54.284	6.2	9.4	18.8	5549100	25617000	48266000
M9PBW0;Q9VSF3	tr|M9PBW0|M9PBW0_DROME Ubiquitin conjugating enzyme E2M, isoform B OS=Drosophila melanogaster GN=UbcE2M PE=3 SV=1;sp|Q9VSF3|UBC12_DROME Nedd8-conjugating enzyme Ubc12 OS=Drosophila melanogaster GN=Ubc12 PE=1 SV=1	2	3	3	20.737	181	11.898	11.6	6.1	28.7	5525000	10278000	71615000
A1Z909;Q8T9K3	tr|A1Z909|A1Z909_DROME CG8545 OS=Drosophila melanogaster GN=CG8545-RA PE=1 SV=1	2	9	9	99.84	891	38.011	4	13.4	8.1	5517900	98148000	37120000
Q9VDV2	tr|Q9VDV2|Q9VDV2_DROME AT06125p OS=Drosophila melanogaster GN=Dmel\CG6195 PE=1 SV=1	1	3	3	40.636	363	4.1224	8.8	5.8	8.8	5504500	6194700	33379000
Q8IA62;Q9VJ11	tr|Q8IA62|Q8IA62_DROME Calcium load-activated calcium channel OS=Drosophila melanogaster GN=anon-37B-2 PE=3 SV=1;tr|Q9VJ11|Q9VJ11_DROME Calcium load-activated calcium channel OS=Drosophila melanogaster GN=TuB2 PE=1 SV=1	2	1	1	20.369	177	4.0169	10.7	10.7	10.7	5475300	9064200	20313000
Q8IQE6	tr|Q8IQE6|Q8IQE6_DROME IRSp53, isoform A OS=Drosophila melanogaster GN=IRSp53 PE=4 SV=2	1	1	1	120.32	1076	2.3737	1	1	1	5475000	33949000	7240100
Q8MQQ9;C3KKC8;A1Z9K0	tr|Q8MQQ9|Q8MQQ9_DROME LD17208p (Fragment) OS=Drosophila melanogaster GN=CG6701 PE=2 SV=1;tr|C3KKC8|C3KKC8_DROME MIP09682p OS=Drosophila melanogaster GN=CG6701-RA PE=2 SV=1;tr|A1Z9K0|A1Z9K0_DROME CG6701, isoform B OS=Drosophila melanogaster GN=CG6701 PE=1	3	7	7	143.28	1261	15.48	4.4	2.5	7.5	5468100	5835400	90033000
Q7KK29;Q9VEN9	tr|Q7KK29|Q7KK29_DROME BcDNA.LD27979 OS=Drosophila melanogaster GN=Patr-1 PE=2 SV=1;tr|Q9VEN9|Q9VEN9_DROME Protein associated with topo II related-1, isoform A OS=Drosophila melanogaster GN=Patr-1 PE=1 SV=1	2	2	2	102.82	919	4.4816	2.4	1.1	2.4	5437300	4994200	36093000
Q24050	tr|Q24050|Q24050_DROME Anon-i1 protein OS=Drosophila melanogaster GN=anon-i1 PE=1 SV=1	1	2	2	28.883	262	5.5948	6.5	13.4	6.5	5374000	13496000	32700000
Q9U972;Q94541;Q7K4Y0;Q8SZK8;Q4V444;Q9VG68;Q9N9Z8;Q9BLE1	tr|Q9U972|Q9U972_DROME Fatty acid desaturase OS=Drosophila melanogaster GN=Desat1 PE=2 SV=1;tr|Q94541|Q94541_DROME Fatty acid desaturase OS=Drosophila melanogaster GN=Desat1 PE=2 SV=1;tr|Q7K4Y0|Q7K4Y0_DROME Desaturase 1, isoform A OS=Drosophila melanogaste	8	4	4	43.466	383	45.855	8.1	5.5	10.2	5359700	3978800	38808000
O77430	tr|O77430|O77430_DROME GEO01111p1 OS=Drosophila melanogaster GN=SkpA PE=1 SV=1	1	3	3	18.597	162	7.8412	26.5	11.7	19.8	5348100	0	5371300
Q9VIV2;M9PDF2	sp|Q9VIV2|SWM_DROME Zinc finger protein swm OS=Drosophila melanogaster GN=swm PE=1 SV=1;tr|M9PDF2|M9PDF2_DROME Second mitotic wave missing, isoform C OS=Drosophila melanogaster GN=swm PE=1 SV=1	2	1	1	115.72	1062	5.2483	2.7	2.7	0	5342800	5647500	0
E1JJI5;P54367	tr|E1JJI5|E1JJI5_DROME Casein kinase ialpha, isoform D OS=Drosophila melanogaster GN=CkIalpha PE=1 SV=1;sp|P54367|KC1A_DROME Casein kinase I isoform alpha OS=Drosophila melanogaster GN=CkIalpha PE=1 SV=1	2	4	4	39.535	337	7.6531	5.9	8.6	11.9	5304000	15692000	69377000
Q9VH84;Q8IFW3;A8JQW3	tr|Q9VH84|Q9VH84_DROME Pinin, isoform A OS=Drosophila melanogaster GN=Pnn PE=1 SV=1;tr|Q8IFW3|Q8IFW3_DROME Pinin OS=Drosophila melanogaster GN=Pnn PE=2 SV=1;tr|A8JQW3|A8JQW3_DROME Pinin, isoform B OS=Drosophila melanogaster GN=Pnn PE=1 SV=1	3	3	3	35.907	303	13.507	12.9	0	8.6	5212400	0	63010000
B5RJ67;Q9I7K0	tr|B5RJ67|B5RJ67_DROME FI07631p (Fragment) OS=Drosophila melanogaster GN=Jupiter-RD PE=2 SV=1;sp|Q9I7K0|JUPIT_DROME Microtubule-associated protein Jupiter OS=Drosophila melanogaster GN=Jupiter PE=1 SV=2	2	3	3	24.452	230	7.989	13.9	0	20.9	5197600	0	48381000
U3PXA7;Q9VNH6	tr|U3PXA7|U3PXA7_DROME FI22107p1 OS=Drosophila melanogaster GN=sec8-RA PE=2 SV=1;sp|Q9VNH6|EXOC4_DROME Exocyst complex component 4 OS=Drosophila melanogaster GN=Sec8 PE=1 SV=3	2	5	5	111.67	985	12.236	5.8	2.1	3.9	5195500	13978000	25497000
Q9VK44;Q8T3I1	tr|Q9VK44|Q9VK44_DROME CG9934, isoform A OS=Drosophila melanogaster GN=Ube4b PE=1 SV=1;tr|Q8T3I1|Q8T3I1_DROME SD06937p OS=Drosophila melanogaster GN=CG9934 PE=2 SV=1	2	6	6	138.59	1217	15.092	3	3.9	3.8	5167100	16358000	26090000
E1JGM9;Q963E6;Q6NPA6;Q9V8V8;A1ZBL5;A1ZBL7;Q7YU80;Q963E5;Q95U75;E1JGN0;A1ZBL9	tr|E1JGM9|E1JGM9_DROME Par-1, isoform S OS=Drosophila melanogaster GN=par-1 PE=1 SV=1;tr|Q963E6|Q963E6_DROME Par-1, isoform W OS=Drosophila melanogaster GN=par-1 PE=1 SV=1;tr|Q6NPA6|Q6NPA6_DROME Par-1, isoform L OS=Drosophila melanogaster GN=par-1 PE=1 SV=	11	4	4	88.549	827	18.933	2.4	1.1	7	5139700	3342200	31745000
Q2XXZ0;Q9VWE7;Q9BP41	tr|Q2XXZ0|Q2XXZ0_DROME CG12234 (Fragment) OS=Drosophila melanogaster GN=Ranbp21 PE=4 SV=1;tr|Q9VWE7|Q9VWE7_DROME LD26789p OS=Drosophila melanogaster GN=Ranbp21 PE=1 SV=1;tr|Q9BP41|Q9BP41_DROME RanBP21 OS=Drosophila melanogaster GN=Ranbp21 PE=1 SV=1	3	3	3	137.82	1228	6.983	2.9	3.8	2.9	5124100	15422000	16968000
H5V888;C8VV04;C7LA80;A0A0B4KFI7;A0A0B4K7L1;P52034	tr|H5V888|H5V888_DROME ATP-dependent 6-phosphofructokinase OS=Drosophila melanogaster GN=Pfk-RB PE=2 SV=1;tr|C8VV04|C8VV04_DROME ATP-dependent 6-phosphofructokinase OS=Drosophila melanogaster GN=Pfk-RB PE=2 SV=1;tr|C7LA80|C7LA80_DROME ATP-dependent 6-phosp	6	4	4	86.647	788	10.839	5.2	5.6	7.2	5088400	24150000	28057000
Q95RX5	sp|Q95RX5|KCMF1_DROME E3 ubiquitin-protein ligase Kcmf1 OS=Drosophila melanogaster GN=Kcmf1 PE=1 SV=1	1	2	2	62.397	599	10.507	2.8	2.8	6	5052500	3833700	17277000
Q8IPJ7;D3DMD4;M9PCQ1;Q27597	tr|Q8IPJ7|Q8IPJ7_DROME Cytochrome P450 reductase, isoform B OS=Drosophila melanogaster GN=Cpr PE=1 SV=1;tr|D3DMD4|D3DMD4_DROME GH28443p (Fragment) OS=Drosophila melanogaster GN=Cpr-RB PE=2 SV=1;tr|M9PCQ1|M9PCQ1_DROME NADPH--cytochrome P450 reductase OS=Dro	4	5	5	62.866	550	12.443	4.5	7.8	6	5049100	23159000	30282000
A0A0B4KH09;A0A0B4K6L6;A0A0B4LHP1;A0A0B4JD02;A0A0B4JDF1;P16371;F0JAN3	tr|A0A0B4KH09|A0A0B4KH09_DROME Groucho, isoform I OS=Drosophila melanogaster GN=gro PE=1 SV=1;tr|A0A0B4K6L6|A0A0B4K6L6_DROME Groucho, isoform H OS=Drosophila melanogaster GN=gro PE=1 SV=1;tr|A0A0B4LHP1|A0A0B4LHP1_DROME Groucho, isoform J OS=Drosophila mela	7	4	4	76.559	698	52.77	7	10.7	7.6	5032200	51369000	26015000
Q9VEE9	tr|Q9VEE9|Q9VEE9_DROME LD22559p OS=Drosophila melanogaster GN=Alg1 PE=1 SV=1	1	2	2	50.97	446	4.0823	6.1	2.5	6.1	5031100	7996200	25729000
Q9W3B2	tr|Q9W3B2|Q9W3B2_DROME Protein MAK16 homolog OS=Drosophila melanogaster GN=Rbm13 PE=1 SV=1	1	3	3	40.585	343	5.6846	7.9	0	7.9	5002600	0	30970000
Q9VB23	tr|Q9VB23|Q9VB23_DROME Serine/threonine protein phosphatase 2A regulatory subunit OS=Drosophila melanogaster GN=wdb PE=1 SV=2	1	3	3	59.726	524	6.2985	4.6	4.2	4.2	4982200	37074000	39134000
Q9VAC1	tr|Q9VAC1|Q9VAC1_DROME CG7920, isoform A OS=Drosophila melanogaster GN=BEST:GH02390 PE=1 SV=1	1	3	3	51.854	477	7.0424	5.5	5.5	7.1	4971700	16891000	57274000
C8VV30;A0A0B4LGZ3;P36872	tr|C8VV30|C8VV30_DROME Serine/threonine-protein phosphatase 2A 55 kDa regulatory subunit B OS=Drosophila melanogaster GN=tws-RB PE=2 SV=1;tr|A0A0B4LGZ3|A0A0B4LGZ3_DROME Serine/threonine-protein phosphatase 2A 55 kDa regulatory subunit B OS=Drosophila melan	3	3	3	50.789	443	14.446	5.6	8.4	8.4	4960300	25276000	69536000
Q9VMX3	tr|Q9VMX3|Q9VMX3_DROME CG3756 OS=Drosophila melanogaster GN=Dmel\CG3756 PE=1 SV=1	1	4	4	38.137	333	28.32	4.2	22.8	5.4	4937200	38563000	32373000
Q9VGQ1	tr|Q9VGQ1|Q9VGQ1_DROME CG5214 OS=Drosophila melanogaster GN=Dmel\CG5214 PE=1 SV=1	1	4	4	49.924	468	8.3988	1.7	4.5	11.1	4895500	14005000	38998000
P91938	sp|P91938|TRXR1_DROME Thioredoxin reductase 1, mitochondrial OS=Drosophila melanogaster GN=Trxr-1 PE=1 SV=2	1	1	1	64.322	596	4.7094	4.4	4.4	4.4	4883600	8411400	11384000
Q9XZ53;Q7KN63	tr|Q9XZ53|Q9XZ53_DROME Oligosaccharyl transferase 3 OS=Drosophila melanogaster GN=Stt3B PE=1 SV=1;tr|Q7KN63|Q7KN63_DROME GM01838p (Fragment) OS=Drosophila melanogaster GN=Stt3B PE=2 SV=1	2	2	1	87.626	774	11.937	2.8	1.9	2.8	4880300	10672000	31171000
Q6NR46	tr|Q6NR46|Q6NR46_DROME RE58623p OS=Drosophila melanogaster GN=Spt-I PE=1 SV=1	1	6	6	52.533	468	26.44	11.1	12.4	17.5	4807500	26617000	76860000
Q7YWB4;Q7K221;A1ZAA5;Q8IHB4	tr|Q7YWB4|Q7YWB4_DROME Aminotransferase OS=Drosophila melanogaster GN=Got1 PE=2 SV=1;tr|Q7K221|Q7K221_DROME Glutamate oxaloacetate transaminase 1, isoform A OS=Drosophila melanogaster GN=Got1 PE=1 SV=1;tr|A1ZAA5|A1ZAA5_DROME Glutamate oxaloacetate transami	4	2	2	46.117	416	5.3716	6.2	6.2	6.2	4782600	19494000	11610000
Q9VQQ9	sp|Q9VQQ9|EXOC2_DROME Exocyst complex component 2 OS=Drosophila melanogaster GN=Sec5 PE=2 SV=1	1	2	2	100.73	894	2.2473	3.9	0	0	4763000	0	0
B5RJN7;Q9VEB3	tr|B5RJN7|B5RJN7_DROME FI07636p (Fragment) OS=Drosophila melanogaster GN=CG7993-RA PE=2 SV=1;sp|Q9VEB3|RPF2_DROME Ribosome production factor 2 homolog OS=Drosophila melanogaster GN=Non3 PE=2 SV=3	2	7	7	38.289	335	16.103	5.7	23.9	20.6	4747400	141400000	135370000
E1JGZ8;A1Z734;A0A0B4KEE7;E1JGZ7;Q6NND6;Q8IGL5;C6TP27	tr|E1JGZ8|E1JGZ8_DROME Leucine-rich repeat, isoform C OS=Drosophila melanogaster GN=LRR PE=1 SV=1;tr|A1Z734|A1Z734_DROME Leucine-rich repeat, isoform B OS=Drosophila melanogaster GN=LRR PE=1 SV=2;tr|A0A0B4KEE7|A0A0B4KEE7_DROME Leucine-rich repeat, isoform	7	8	8	155.08	1429	21.716	2.8	1	8.1	4740300	5518100	154410000
Q9VLQ1	sp|Q9VLQ1|ALG5_DROME Dolichyl-phosphate beta-glucosyltransferase OS=Drosophila melanogaster GN=wol PE=1 SV=1	1	3	3	37.081	326	7.6634	9.8	13.2	13.2	4733200	22969000	21393000
Q9VWQ2;F0JAJ4;E5KZ58;E5KZ57;E5KZ50;A0A0B4KGX7;Q95TN8;Q9VUQ9	sp|Q9VWQ2|S6KL_DROME Serine/threonine-protein kinase S6KL OS=Drosophila melanogaster GN=S6KL PE=1 SV=1;tr|F0JAJ4|F0JAJ4_DROME AT06858p (Fragment) OS=Drosophila melanogaster GN=CG7053-RA PE=2 SV=1;tr|E5KZ58|E5KZ58_DROME CG6498 (Fragment) OS=Drosophila melan	8	2	2	55.372	483	2.2585	3.3	3.3	3.3	4719900	103920000	58218000
Q8MSW3;B7Z0L1;B7Z0L0;Q9VES3;Q8INA9;A0A0B4KH94;A8JR25;P10674	tr|Q8MSW3|Q8MSW3_DROME LD25556p OS=Drosophila melanogaster GN=Fas1 PE=2 SV=1;tr|B7Z0L1|B7Z0L1_DROME Fasciclin 1, isoform E OS=Drosophila melanogaster GN=Fas1 PE=1 SV=1;tr|B7Z0L0|B7Z0L0_DROME Fasciclin 1, isoform F OS=Drosophila melanogaster GN=Fas1 PE=1 SV	8	2	2	46.808	423	2.2174	7.3	0	0	4718800	0	0
Q8SYX1;Q8IR19;Q59E43	tr|Q8SYX1|Q8SYX1_DROME RE29988p OS=Drosophila melanogaster GN=CG32576 PE=2 SV=1;tr|Q8IR19|Q8IR19_DROME Uncharacterized protein, isoform A OS=Drosophila melanogaster GN=BcDNA:RE29988 PE=1 SV=1;tr|Q59E43|Q59E43_DROME Uncharacterized protein, isoform B OS=Dro	3	1	1	14.059	128	15.476	11.7	11.7	11.7	4707100	15137000	13891000
Q5U0X8	tr|Q5U0X8|Q5U0X8_DROME LD10780p OS=Drosophila melanogaster GN=CG12325 PE=1 SV=1	1	4	4	105.99	949	8.4075	2.6	3.5	2.1	4699200	14835000	12618000
Q7JYX3	tr|Q7JYX3|Q7JYX3_DROME GEO08273p1 OS=Drosophila melanogaster GN=CG15083 PE=2 SV=1	1	1	1	16.801	150	5.5562	10	10	10	4692900	7637000	9639400
Q9VBU8	tr|Q9VBU8|Q9VBU8_DROME Nucleoporin 37kD, isoform A OS=Drosophila melanogaster GN=Nup37 PE=2 SV=1	1	4	4	35.35	320	8.9259	12.2	18.8	12.2	4690800	29944000	29595000
M9PEB1;Q95R81;Q9VRV1;M9PEH8	tr|M9PEB1|M9PEB1_DROME Uncharacterized protein, isoform B OS=Drosophila melanogaster GN=Dmel\CG10289 PE=1 SV=1;tr|Q95R81|Q95R81_DROME SD02803p OS=Drosophila melanogaster GN=CG10289 PE=2 SV=1;tr|Q9VRV1|Q9VRV1_DROME Uncharacterized protein, isoform A OS=Dros	4	8	8	108.44	967	12.35	4.4	0.9	9.7	4686200	4894700	113830000
M9PCE0;Q01604	tr|M9PCE0|M9PCE0_DROME Phosphoglycerate kinase OS=Drosophila melanogaster GN=Pgk PE=3 SV=1;sp|Q01604|PGK_DROME Phosphoglycerate kinase OS=Drosophila melanogaster GN=Pgk PE=2 SV=2	2	4	4	43.861	415	13.154	8.7	15.2	15.2	4670400	46925000	53718000
Q7K3W2	tr|Q7K3W2|Q7K3W2_DROME CG8728 OS=Drosophila melanogaster GN=CG8728-RA PE=1 SV=1	1	2	2	61.049	556	5.0171	4.7	0	0	4653500	0	0
Q9VHX9;Q8SYR7;A0A0B4KFA6	tr|Q9VHX9|Q9VHX9_DROME CD98 heavy chain, isoform A OS=Drosophila melanogaster GN=CD98hc PE=1 SV=1;tr|Q8SYR7|Q8SYR7_DROME RE39378p OS=Drosophila melanogaster GN=CD98hc PE=2 SV=1;tr|A0A0B4KFA6|A0A0B4KFA6_DROME CD98 heavy chain, isoform D OS=Drosophila melano	3	2	2	62.676	565	7.8352	6.5	3.2	0	4628400	0	0
Q95RX9;A0A0B4LFE8;B6IDW1;P82711	tr|Q95RX9|Q95RX9_DROME LD02462p OS=Drosophila melanogaster GN=Cyp6a19 PE=2 SV=1;tr|A0A0B4LFE8|A0A0B4LFE8_DROME Cyp6a19, isoform B OS=Drosophila melanogaster GN=Cyp6a19 PE=4 SV=1;tr|B6IDW1|B6IDW1_DROME RE34964p (Fragment) OS=Drosophila melanogaster GN=Cyp6a	4	1	1	36.772	318	-2	4.4	0	0	4606500	0	0
Q961C3;Q9VH75;Q6NN19;E1JIH4	tr|Q961C3|Q961C3_DROME CG8478, isoform B OS=Drosophila melanogaster GN=Dmel\CG8478 PE=1 SV=1;tr|Q9VH75|Q9VH75_DROME CG8478, isoform C OS=Drosophila melanogaster GN=Dmel\CG8478 PE=1 SV=4;tr|Q6NN19|Q6NN19_DROME RE04973p OS=Drosophila melanogaster GN=CG8478 P	4	3	3	62.427	571	10.172	6.8	3.2	8.9	4588200	2848200	67036000
E2QD00;Q7K1V5	tr|E2QD00|E2QD00_DROME Jagunal, isoform B OS=Drosophila melanogaster GN=jagn PE=4 SV=1;sp|Q7K1V5|JAGN_DROME Protein jagunal OS=Drosophila melanogaster GN=jagn PE=1 SV=1	2	2	2	23.036	197	5.6318	12.7	12.7	6.1	4587700	19873000	10775000
Q8IR72	tr|Q8IR72|Q8IR72_DROME FI19011p1 OS=Drosophila melanogaster GN=Dmel\CG32638 PE=1 SV=2	1	1	1	17.721	159	3.3193	10.1	10.1	10.1	4569000	9815600	17264000
Q4QPS8	tr|Q4QPS8|Q4QPS8_DROME IP03802p (Fragment) OS=Drosophila melanogaster PE=2 SV=1	1	1	1	8.9163	81	-2	25.9	0	25.9	4548100	0	25882000
D0Z769;A9UNH9;P04052;Q8SXM3;A9YGC1;F6J9L9;A0A0P0I6H8;A0A0P0HG20;A0A0P0H2M6	tr|D0Z769|D0Z769_DROME DNA-directed RNA polymerase subunit OS=Drosophila melanogaster GN=RpII215-RA PE=2 SV=1;tr|A9UNH9|A9UNH9_DROME DNA-directed RNA polymerase subunit OS=Drosophila melanogaster PE=2 SV=1;sp|P04052|RPB1_DROME DNA-directed RNA polymerase I	9	11	11	209.17	1887	22.658	1.4	5.6	2.4	4541800	84100000	32452000
Q7JWF1	tr|Q7JWF1|Q7JWF1_DROME Electron transfer flavoprotein-ubiquinone oxidoreductase, isoform A OS=Drosophila melanogaster GN=Etf-QO PE=1 SV=1	1	5	5	65.987	604	38.377	4.6	5.8	10.4	4539700	17294000	95360000
A0A0B4LHL7;Q24251	tr|A0A0B4LHL7|A0A0B4LHL7_DROME ATP synthase subunit d, mitochondrial OS=Drosophila melanogaster GN=ATPsynD PE=3 SV=1;sp|Q24251|ATP5H_DROME ATP synthase subunit d, mitochondrial OS=Drosophila melanogaster GN=ATPsynD PE=2 SV=2	2	3	3	20.2	178	5.4918	15.2	7.9	13.5	4505100	6514400	30994000
P20240	sp|P20240|OTE_DROME Otefin OS=Drosophila melanogaster GN=Ote PE=1 SV=2	1	9	9	46.583	424	111.79	11.3	4	40.8	4494600	0	269840000
Q9VZW1;Q8SZE1	tr|Q9VZW1|Q9VZW1_DROME Phospholipid scramblase OS=Drosophila melanogaster GN=scramb2 PE=1 SV=1;tr|Q8SZE1|Q8SZE1_DROME Phospholipid scramblase OS=Drosophila melanogaster GN=scramb2 PE=2 SV=1	2	2	2	29.58	263	2.7847	8	0	0	4487200	0	0
Q8IHC4;Q8I934;D3DMM9;Q9VRR4;Q8I0D5;Q8IGR6;Q8I935;I0DHK9;M9PBR6	tr|Q8IHC4|Q8IHC4_DROME AT14559p OS=Drosophila melanogaster GN=CG10977 PE=2 SV=1;tr|Q8I934|Q8I934_DROME Uncharacterized protein, isoform B OS=Drosophila melanogaster GN=BcDNA:GH09028 PE=1 SV=1;tr|D3DMM9|D3DMM9_DROME MIP15655p OS=Drosophila melanogaster GN=C	9	1	1	22.68	206	2.0349	4.9	0	4.9	4470600	0	22529000
A0A0B4LGI1;P20354;M9PDM5;P16378;P25157	tr|A0A0B4LGI1|A0A0B4LGI1_DROME G protein alpha s subunit, isoform E OS=Drosophila melanogaster GN=Galphas PE=1 SV=1;sp|P20354|GNAS_DROME G protein alpha s subunit OS=Drosophila melanogaster GN=Galphas PE=2 SV=1	5	3	2	44.699	382	3.2816	8.4	2.9	5.5	4459100	0	6881400
A1Z945;A0A0B4K859	tr|A1Z945|A1Z945_DROME CG8771, isoform B OS=Drosophila melanogaster GN=CG8771 PE=1 SV=2;tr|A0A0B4K859|A0A0B4K859_DROME CG8771, isoform C OS=Drosophila melanogaster GN=CG8771 PE=1 SV=1	2	5	5	210.31	1839	26.245	2.1	2.2	3.7	4450900	24970000	60493000
D8FT34;Q8IMF0	tr|D8FT34|D8FT34_DROME MIP18914p OS=Drosophila melanogaster GN=CG31601-RA PE=2 SV=1;tr|Q8IMF0|Q8IMF0_DROME Uncharacterized protein, isoform B OS=Drosophila melanogaster GN=Dmel\CG31601 PE=4 SV=2	2	2	2	82.232	724	5.2394	6.1	0	2.3	4449200	0	7130200
Q9VIZ3	tr|Q9VIZ3|Q9VIZ3_DROME LD25692p OS=Drosophila melanogaster GN=l(2)37Cb PE=1 SV=1	1	5	5	102.83	894	11.797	3.1	2.7	3.8	4447200	9482800	25158000
C6TP86;Q9W0L0;Q7KY09;Q7KVD1;Q8IRI4;C8VV43;Q8T987;Q7YZA0;Q8IRI5;Q8IH76	tr|C6TP86|C6TP86_DROME LP19492p OS=Drosophila melanogaster GN=trio-RA PE=2 SV=1;tr|Q9W0L0|Q9W0L0_DROME Guanine-nucleotide-exchange-factor TRIO OS=Drosophila melanogaster GN=trio PE=2 SV=3;tr|Q7KY09|Q7KY09_DROME Trio OS=Drosophila melanogaster GN=trio PE=2	10	4	4	226.08	1987	13.814	1.2	0	2.3	4429400	0	38510000
Q9VCN6;O96679;C9QP02	tr|Q9VCN6|Q9VCN6_DROME Cell division cycle 16 OS=Drosophila melanogaster GN=Cdc16 PE=1 SV=1;tr|O96679|O96679_DROME CDC16 OS=Drosophila melanogaster GN=Cdc16 PE=2 SV=1;tr|C9QP02|C9QP02_DROME MIP13609p (Fragment) OS=Drosophila melanogaster GN=cdc16-RA PE=2 S	3	2	2	81.737	718	7.9033	3.1	3.1	2.5	4379300	8265800	13628000
O77434;M9PGI6	tr|O77434|O77434_DROME EG:34F3.8 protein OS=Drosophila melanogaster GN=Sec22 PE=1 SV=2;tr|M9PGI6|M9PGI6_DROME Secretory 22, isoform B OS=Drosophila melanogaster GN=Sec22 PE=1 SV=1	2	2	2	24.646	211	5.2962	13.7	9	9	4377300	10105000	16400000
O18405	sp|O18405|SURF4_DROME Surfeit locus protein 4 homolog OS=Drosophila melanogaster GN=Surf4 PE=2 SV=1	1	3	3	30.545	270	12.696	4.8	8.9	8.9	4357400	50342000	52068000
Q9VRP2;Q5U0Z2	tr|Q9VRP2|Q9VRP2_DROME Uncharacterized protein, isoform A OS=Drosophila melanogaster GN=BEST:CK00496 PE=1 SV=1;tr|Q5U0Z2|Q5U0Z2_DROME LD30448p OS=Drosophila melanogaster GN=CG10576 PE=2 SV=2	2	4	4	42.773	391	7.608	8.7	5.1	0	4338400	7835500	0
X2J9M9;Q4V5C6;X2JDZ6;Q9VK04;Q9VK06	tr|X2J9M9|X2J9M9_DROME Phospholipid-transporting ATPase OS=Drosophila melanogaster GN=Dmel\CG31729 PE=1 SV=1;tr|Q4V5C6|Q4V5C6_DROME Phospholipid-transporting ATPase OS=Drosophila melanogaster GN=CG31729 PE=2 SV=1;tr|X2JDZ6|X2JDZ6_DROME Phospholipid-transpo	5	2	2	111.46	994	5.971	3.9	3.9	0	4335600	13212000	0
Q9W396;Q95SE0	tr|Q9W396|Q9W396_DROME FI06908p OS=Drosophila melanogaster GN=HP1b PE=1 SV=1;tr|Q95SE0|Q95SE0_DROME GM01918p OS=Drosophila melanogaster GN=HP1b PE=2 SV=1	2	2	2	25.974	240	7.2158	4.6	9.6	9.6	4319700	16584000	47320000
Q8SY06;A1Z8D0;B5X0K1	tr|Q8SY06|Q8SY06_DROME RE21021p OS=Drosophila melanogaster GN=nclb PE=2 SV=1;tr|A1Z8D0|A1Z8D0_DROME No child left behind OS=Drosophila melanogaster GN=nclb PE=1 SV=1;tr|B5X0K1|B5X0K1_DROME FI03249p (Fragment) OS=Drosophila melanogaster GN=CG6751-RA PE=2 SV	3	6	6	51.292	459	25.003	2.2	12.6	21.1	4316700	72038000	226950000
Q9VXF4;Q8T9H7	tr|Q9VXF4|Q9VXF4_DROME CG9902, isoform A OS=Drosophila melanogaster GN=Dmel\CG9902 PE=4 SV=1;tr|Q8T9H7|Q8T9H7_DROME GM14421p OS=Drosophila melanogaster GN=CG9902 PE=2 SV=1	2	4	1	129.33	1137	4.0018	3.1	4.3	3.6	4294600	10547000	31526000
V5P0Q7;Q9VVG4	tr|V5P0Q7|V5P0Q7_DROME FI21227p1 OS=Drosophila melanogaster GN=sec3-RA PE=2 SV=1;sp|Q9VVG4|EXOC1_DROME Exocyst complex component 1 OS=Drosophila melanogaster GN=Sec3 PE=1 SV=2	2	2	2	102.69	889	4.0083	1.2	0	2.5	4289800	0	15287000
Q9GSP5;Q0E965;G2J5W6;A0A0B4KF69;Q95SW3;A1ZA05;Q6NP56;C4JC89;C5WLP3	tr|Q9GSP5|Q9GSP5_DROME SR protein kinase 1 OS=Drosophila melanogaster GN=SRPK PE=2 SV=1;tr|Q0E965|Q0E965_DROME SR protein kinase, isoform A OS=Drosophila melanogaster GN=SRPK PE=1 SV=1;tr|G2J5W6|G2J5W6_DROME RE75274p1 OS=Drosophila melanogaster GN=SRPK-RA	9	3	3	85.089	764	21.928	3.4	5	5	4279200	10738000	19260000
P91634;H1ZY91;H1ZY88	tr|P91634|P91634_DROME PI-3 kinase OS=Drosophila melanogaster GN=Pi3K92E PE=1 SV=1;tr|H1ZY91|H1ZY91_DROME Uncharacterized protein Pi3K92E OS=Drosophila melanogaster GN=Pi3K92E PE=3 SV=1;tr|H1ZY88|H1ZY88_DROME Uncharacterized protein Pi3K92E OS=Drosophila m	3	3	3	127	1088	10.822	1.6	2.9	4	4276400	6970100	43947000
P17210;Q6NNT8	sp|P17210|KINH_DROME Kinesin heavy chain OS=Drosophila melanogaster GN=Khc PE=1 SV=2;tr|Q6NNT8|Q6NNT8_DROME Kinesin-like protein (Fragment) OS=Drosophila melanogaster PE=2 SV=1	2	5	5	110.4	975	14.63	4	0	6.1	4274400	0	47792000
M9PI82;P91891	tr|M9PI82|M9PI82_DROME Mo25, isoform B OS=Drosophila melanogaster GN=Mo25 PE=4 SV=1;sp|P91891|MO25_DROME Protein Mo25 OS=Drosophila melanogaster GN=Mo25 PE=2 SV=2	2	2	2	39.385	339	4.3996	2.9	5.3	0	4256100	3468600	0
Q5U151;Q8IRI8	tr|Q5U151|Q5U151_DROME LP20617p (Fragment) OS=Drosophila melanogaster GN=CG32483 PE=2 SV=1;tr|Q8IRI8|Q8IRI8_DROME Uncharacterized protein OS=Drosophila melanogaster GN=Dmel\CG32483 PE=1 SV=1	2	1	1	49.199	438	-2	4.1	0	4.1	4251800	0	33427000
C9QP09;Q9GNC8;A0A0B4KFY5;Q0KI94;Q8T4D1;Q0KI96;A0A023UKB8;Q9GQN3;Q6AWM9;Q9GQN4;Q8INP0;A0A0B4LGY5;Q8IGS7;A0A0B4LI06;A0A0B4JCX5;A0A0B4KGY6	tr|C9QP09|C9QP09_DROME MIP13670p (Fragment) OS=Drosophila melanogaster GN=ps-RK PE=2 SV=1;tr|Q9GNC8|Q9GNC8_DROME PASILLA splice variant 1 OS=Drosophila melanogaster GN=ps PE=1 SV=1;tr|A0A0B4KFY5|A0A0B4KFY5_DROME Pasilla, isoform Q OS=Drosophila melanogaste	16	2	2	36.303	346	3.5816	4	7.2	4	4221400	8494000	18815000
Q9VNV3	sp|Q9VNV3|DDX1_DROME ATP-dependent RNA helicase Ddx1 OS=Drosophila melanogaster GN=Ddx1 PE=2 SV=1	1	2	2	80.869	727	9.3192	3.3	3.3	3.3	4213000	16607000	10122000
Q9VZP2;Q960F0	tr|Q9VZP2|Q9VZP2_DROME FI19868p1 OS=Drosophila melanogaster GN=Dmel\CG14971 PE=2 SV=1;tr|Q960F0|Q960F0_DROME SD04505p OS=Drosophila melanogaster GN=CG14971 PE=2 SV=1	2	2	2	51.927	469	12.431	2.6	6.6	2.6	4188000	13856000	18022000
A0A0B4LHF7;Q9VD51	tr|A0A0B4LHF7|A0A0B4LHF7_DROME Pitchoune, isoform C OS=Drosophila melanogaster GN=pit PE=3 SV=1;sp|Q9VD51|DDX18_DROME Probable ATP-dependent RNA helicase pitchoune OS=Drosophila melanogaster GN=pit PE=2 SV=2	2	10	10	76.927	680	40.871	5.6	21.5	11	4164900	132870000	68147000
X2JCY2;Q9VUL1	tr|X2JCY2|X2JCY2_DROME CTP synthase OS=Drosophila melanogaster GN=CTPsyn PE=3 SV=1;sp|Q9VUL1|PYRG_DROME CTP synthase OS=Drosophila melanogaster GN=CTPsyn PE=1 SV=2	2	4	4	69.447	627	10.466	1.9	6.7	9.6	4136900	23276000	76180000
Q960F6;A1A714	tr|Q960F6|Q960F6_DROME SD03655p OS=Drosophila melanogaster GN=anon-EST:fe3A8 PE=2 SV=1;tr|A1A714|A1A714_DROME IP17403p OS=Drosophila melanogaster GN=anon-EST:fe3A8 PE=2 SV=1	2	2	2	45.265	403	3.7488	5.2	2.7	2.7	4125000	2623800	5302400
Q6A4W6;Q6A4W4;Q6A4T7;Q6A4T5;Q6A4S5;Q6A4R8;Q6A4R5;Q7KVY5;C0PUX5;B6IDN4;A4V3W2;A4V3W1;Q0KHW6;A8JUV9;H5V852;M9PGC4;M9PGV7;P18431	tr|Q6A4W6|Q6A4W6_DROME SGG (Fragment) OS=Drosophila melanogaster GN=sgg PE=4 SV=1;tr|Q6A4W4|Q6A4W4_DROME SGG (Fragment) OS=Drosophila melanogaster GN=sgg PE=4 SV=1;tr|Q6A4T7|Q6A4T7_DROME SGG (Fragment) OS=Drosophila melanogaster GN=sgg PE=4 SV=1;tr|Q6A4T5|	18	1	1	19.543	211	3.0954	9.5	0	0	4110800	0	0
Q9VQK5	tr|Q9VQK5|Q9VQK5_DROME CG3542 OS=Drosophila melanogaster GN=prp40 PE=1 SV=1	1	9	9	91.327	806	25.946	5	10.2	10.8	4096300	58118000	137050000
Q9VQZ6	sp|Q9VQZ6|ELP3_DROME Probable elongator complex protein 3 OS=Drosophila melanogaster GN=Elp3 PE=2 SV=1	1	2	2	62.821	552	3.1052	3.3	1.8	3.3	4092700	0	18522000
Q86DS7;Q53ZT0;Q24133	tr|Q86DS7|Q86DS7_DROME DNAJ-1 OS=Drosophila melanogaster GN=DnaJ-1 PE=4 SV=1;tr|Q53ZT0|Q53ZT0_DROME DNAJ-1 OS=Drosophila melanogaster GN=DnaJ-1 PE=1 SV=1;sp|Q24133|DNAJ1_DROME DnaJ protein homolog 1 OS=Drosophila melanogaster GN=DnaJ-1 PE=1 SV=3	3	6	6	37.058	334	17.416	11.7	17.7	17.7	4083800	32943000	74291000
Q9VY91;B4YX27;B4YX26;F6J2H2;F6J2G8;F6J2G6;F6J2G4;A9YHE2;A9YHD3;A9YHD2	tr|Q9VY91|Q9VY91_DROME LD21074p OS=Drosophila melanogaster GN=Pdcd4 PE=1 SV=2;tr|B4YX27|B4YX27_DROME Uncharacterized protein (Fragment) OS=Drosophila melanogaster GN=CG10990 PE=4 SV=1;tr|B4YX26|B4YX26_DROME Uncharacterized protein (Fragment) OS=Drosophila	10	2	2	56.354	509	5.5779	4.1	4.1	4.1	4073900	10040000	31175000
Q9XZ68	tr|Q9XZ68|Q9XZ68_DROME Beta subunit of type II geranylgeranyl transferase OS=Drosophila melanogaster GN=betaggt-II PE=1 SV=1	1	3	3	38.542	347	5.9316	7.8	6.6	9.8	4070700	5483100	35501000
F6JQA7;F6JQA6;F6JQA2;F6JQ98;F6JQ95;F6JQ92;O77277	tr|F6JQA7|F6JQA7_DROME CG3024 (Fragment) OS=Drosophila melanogaster GN=CG3024 PE=4 SV=1;tr|F6JQA6|F6JQA6_DROME CG3024 (Fragment) OS=Drosophila melanogaster GN=Torsin PE=1 SV=1;tr|F6JQA2|F6JQA2_DROME CG3024 (Fragment) OS=Drosophila melanogaster GN=CG3024 PE	7	2	2	38.151	340	4.8556	5.6	5.6	2.6	4068000	17925000	11204000
Q9VIE7;Q8WSN4;C4IXY5	tr|Q9VIE7|Q9VIE7_DROME Burgundy, isoform B OS=Drosophila melanogaster GN=bur PE=1 SV=3;tr|Q8WSN4|Q8WSN4_DROME GMP synthetase OS=Drosophila melanogaster GN=bur PE=2 SV=1;tr|C4IXY5|C4IXY5_DROME MIP06849p OS=Drosophila melanogaster GN=bur-RA PE=2 SV=1	3	8	8	76.789	683	31.632	6	6	17.4	4049400	15764000	114200000
D6W4V2;D3DN23;Q7KVH7;T2GGE7;A0A0B4K7M9;A0A0F7J3E9;Q27237	tr|D6W4V2|D6W4V2_DROME UT01205p OS=Drosophila melanogaster GN=l(2)tid-RC PE=2 SV=1;tr|D3DN23|D3DN23_DROME GH23452p OS=Drosophila melanogaster GN=l(2)tid PE=1 SV=1;tr|Q7KVH7|Q7KVH7_DROME Lethal (2) tumorous imaginal discs, isoform C OS=Drosophila melanogast	7	3	3	56.262	507	10.098	5.9	10.1	10.1	4015800	18912000	47440000
P54358	sp|P54358|DPOD1_DROME DNA polymerase delta catalytic subunit OS=Drosophila melanogaster GN=DNApol-delta PE=2 SV=2	1	4	4	124.9	1092	10.529	3.4	3.2	4.5	4013000	10037000	30565000
Q9VKK1	sp|Q9VKK1|EDC4_DROME Enhancer of mRNA-decapping protein 4 homolog OS=Drosophila melanogaster GN=Ge-1 PE=1 SV=2	1	4	4	149.25	1354	9.2753	1.7	0.8	2.1	4000300	3779200	27316000
Q7JV69	tr|Q7JV69|Q7JV69_DROME SD11922p OS=Drosophila melanogaster GN=Spn55B PE=1 SV=1	1	5	5	42.148	374	25.563	7.8	16.3	20.3	3998100	50577000	84689000
Q9VJH2	tr|Q9VJH2|Q9VJH2_DROME Aspartyl-tRNA synthetase, mitochondrial, isoform A OS=Drosophila melanogaster GN=AspRS-m PE=1 SV=3	1	8	8	121.52	1082	15.449	3.5	1.1	6.7	3995900	5386400	48755000
Q7K2X8	tr|Q7K2X8|Q7K2X8_DROME Nucleoporin at 44A, isoform A OS=Drosophila melanogaster GN=Nup44A PE=1 SV=1	1	4	4	39.514	354	36.652	11.9	21.5	21.5	3989700	26687000	41332000
Q3KN34;Q9W053;Q7Z1Y4;Q0E8J5;Q0E8J4;M9PE03;Q0E8J3;M9PBJ1	tr|Q3KN34|Q3KN34_DROME GH18167p (Fragment) OS=Drosophila melanogaster GN=CG33484-RA PE=2 SV=1;tr|Q9W053|Q9W053_DROME Zormin, isoform F OS=Drosophila melanogaster GN=zormin PE=1 SV=4;tr|Q7Z1Y4|Q7Z1Y4_DROME Zormin OS=Drosophila melanogaster GN=zormin PE=4 SV	8	2	2	312.34	2753	2.5	0.4	0.4	0.8	3976800	12246000	25753000
Q9VMS1	tr|Q9VMS1|Q9VMS1_DROME Cyclope, isoform A OS=Drosophila melanogaster GN=cype PE=1 SV=3	1	1	1	8.2955	77	2.9566	18.2	0	0	3975400	0	0
Q58CJ2;H8F4T6;Q9V6U9	tr|Q58CJ2|Q58CJ2_DROME AT25977p OS=Drosophila melanogaster GN=CG16935 PE=2 SV=1;tr|H8F4T6|H8F4T6_DROME FI19911p1 OS=Drosophila melanogaster GN=CG16935-RA PE=1 SV=1;sp|Q9V6U9|MECR_DROME Enoyl-[acyl-carrier-protein] reductase, mitochondrial OS=Drosophila mel	3	2	2	35.366	325	11.42	5.2	10.8	5.2	3973800	11869000	14298000
Q9W141	sp|Q9W141|ATPK_DROME Putative ATP synthase subunit f, mitochondrial OS=Drosophila melanogaster GN=CG4692 PE=3 SV=1	1	1	1	12.483	107	2.3849	11.2	11.2	11.2	3967300	7822900	16178000
M9NFF8;P40793	tr|M9NFF8|M9NFF8_DROME Cdc42, isoform C OS=Drosophila melanogaster GN=Cdc42 PE=3 SV=1;sp|P40793|CDC42_DROME Cdc42 homolog OS=Drosophila melanogaster GN=Cdc42 PE=1 SV=1	2	2	1	21.403	191	1.9235	11	11	11	3928200	6397200	13219000
Q9W0R0	tr|Q9W0R0|Q9W0R0_DROME Cell division cycle 5, isoform A OS=Drosophila melanogaster GN=Cdc5 PE=1 SV=2	1	9	9	93.084	814	37.101	3.6	6.8	19	3927300	40066000	193420000
Q9VLQ9;M9NDI3	tr|Q9VLQ9|Q9VLQ9_DROME Sorting nexin OS=Drosophila melanogaster GN=Snx6 PE=1 SV=2;tr|M9NDI3|M9NDI3_DROME Sorting nexin 6, isoform B OS=Drosophila melanogaster GN=Snx6 PE=1 SV=1	2	5	5	50.128	449	13.58	7.1	8.7	13.4	3920100	19747000	89383000
Q9VVW8	sp|Q9VVW8|NNRD_DROME ATP-dependent (S)-NAD(P)H-hydrate dehydratase OS=Drosophila melanogaster GN=CG10424 PE=2 SV=1	1	2	2	32.153	300	2.6329	11.7	11.7	11.7	3919600	10544000	21892000
A0A1B2AJ64;Q9VLR5	tr|A0A1B2AJ64|A0A1B2AJ64_DROME GEO10165p1 (Fragment) OS=Drosophila melanogaster PE=2 SV=1;sp|Q9VLR5|TCP4_DROME RNA polymerase II transcriptional coactivator OS=Drosophila melanogaster GN=Ssb-c31a PE=2 SV=1	2	2	2	12.189	110	4.9236	18.2	9.1	18.2	3918000	22643000	63807000
Q9VK46	tr|Q9VK46|Q9VK46_DROME Protein YIPF OS=Drosophila melanogaster GN=Dmel\CG12404 PE=1 SV=1	1	2	2	28.199	264	8.4033	3.4	15.2	15.2	3911900	34830000	36291000
Q8T3K8;Q9W3D2;Q9W3D3;A9YK25;A9YK27;A9YK16;F6JBR5;O96957	tr|Q8T3K8|Q8T3K8_DROME SD04240p OS=Drosophila melanogaster GN=Crag PE=2 SV=1;tr|Q9W3D2|Q9W3D2_DROME Calmodulin-binding protein related to a Rab3 GDP/GTP exchange protein, isoform B OS=Drosophila melanogaster GN=Crag PE=1 SV=3;tr|Q9W3D3|Q9W3D3_DROME Calmodu	8	4	4	120.41	1083	7.5617	3.4	1	3.1	3900300	1397500	16716000
P39205;E4NKI3;Q6W4E3;Q6W4C3;Q6W4C2	sp|P39205|CIN_DROME Molybdenum cofactor synthesis protein cinnamon OS=Drosophila melanogaster GN=cin PE=1 SV=3;tr|E4NKI3|E4NKI3_DROME MIP27737p (Fragment) OS=Drosophila melanogaster GN=cin-RA PE=2 SV=1	5	3	3	65.732	601	6.8217	4.7	2.5	4.7	3895400	5101800	21777000
Q59E09;Q9VP61	tr|Q59E09|Q59E09_DROME Acetyl-coenzyme A synthetase OS=Drosophila melanogaster GN=AcCoAS PE=1 SV=2;sp|Q9VP61|ACSA_DROME Acetyl-coenzyme A synthetase OS=Drosophila melanogaster GN=AcCoAS PE=2 SV=1	2	3	3	75.945	670	34.543	3.9	3.9	9.1	3893500	12619000	91171000
Q8MSU4	sp|Q8MSU4|SYMPK_DROME Symplekin OS=Drosophila melanogaster GN=Sym PE=1 SV=1	1	5	5	132.08	1165	8.9995	2.4	4	3.2	3863700	22362000	34083000
Q9V426	tr|Q9V426|Q9V426_DROME LD07162p OS=Drosophila melanogaster GN=vig PE=1 SV=1	1	4	4	52.708	490	85.757	4.7	4.7	12.4	3848900	7927900	77545000
X2JD07;H0RNM5;Q9W3C1	tr|X2JD07|X2JD07_DROME RNA cytidine acetyltransferase OS=Drosophila melanogaster GN=l(1)G0020 PE=1 SV=1;tr|H0RNM5|H0RNM5_DROME RNA cytidine acetyltransferase OS=Drosophila melanogaster GN=l(1)G0020-RA PE=2 SV=1;sp|Q9W3C1|NAT10_DROME RNA cytidine acetyltran	3	13	13	108.4	967	72.828	3	18.9	10.4	3837100	185510000	56935000
M9PB96;Q9VKQ3	tr|M9PB96|M9PB96_DROME Ribosome biogenesis protein WDR12 homolog OS=Drosophila melanogaster GN=Dmel\CG6724 PE=3 SV=1;sp|Q9VKQ3|WDR12_DROME Ribosome biogenesis protein WDR12 homolog OS=Drosophila melanogaster GN=CG6724 PE=2 SV=1	2	3	3	46.966	418	5.6537	7.9	7.9	5	3833800	37446000	23007000
P23257	sp|P23257|TBG1_DROME Tubulin gamma-1 chain OS=Drosophila melanogaster GN=gammaTub23C PE=1 SV=2	1	3	3	53.339	475	6.9063	4.2	1.9	6.5	3812600	4613000	13515000
Q9VRP3;Q7KMR7	tr|Q9VRP3|Q9VRP3_DROME AT08565p OS=Drosophila melanogaster GN=Txl PE=1 SV=1;tr|Q7KMR7|Q7KMR7_DROME Thioredoxin-like protein TXL OS=Drosophila melanogaster GN=Txl PE=2 SV=1	2	2	2	31.728	287	4.8021	3.8	8.7	8.7	3810800	13499000	17711000
Q8T9J8;Q9VD26	tr|Q8T9J8|Q8T9J8_DROME GM05688p OS=Drosophila melanogaster GN=CG5382 PE=2 SV=1;sp|Q9VD26|ZFPL1_DROME Zinc finger protein-like 1 homolog OS=Drosophila melanogaster GN=CG5382 PE=1 SV=1	2	2	2	30.404	276	6.999	3.6	3.6	9.8	3780500	7123500	0
U3PXB1;Q9VZE7	tr|U3PXB1|U3PXB1_DROME FI21576p1 OS=Drosophila melanogaster GN=CG1311-RA PE=2 SV=1;sp|Q9VZE7|CTLH1_DROME CTL-like protein 1 OS=Drosophila melanogaster GN=CG1311 PE=2 SV=1	2	1	1	76.84	691	1.9329	1.4	1.4	0	3774700	0	0
Q9VRN1	tr|Q9VRN1|Q9VRN1_DROME Transmembrane 9 superfamily member OS=Drosophila melanogaster GN=TM9SF3 PE=1 SV=2	1	2	2	67.808	592	4.1026	1.9	3.5	0	3768800	9481300	0
M9NCV1;Q9VJD3	tr|M9NCV1|M9NCV1_DROME Four way stop, isoform D OS=Drosophila melanogaster GN=fws PE=4 SV=1;sp|Q9VJD3|COG5_DROME Conserved oligomeric Golgi complex subunit 5 OS=Drosophila melanogaster GN=fws PE=2 SV=1	2	2	2	84.953	751	3.3079	2.5	0	0	3733600	0	0
Q9VRQ7;A9UND8;D3DMG0;Q95RJ7	tr|Q9VRQ7|Q9VRQ7_DROME DNA polymerase epsilon subunit OS=Drosophila melanogaster GN=DNApol-epsilon58 PE=3 SV=1;tr|A9UND8|A9UND8_DROME DNA polymerase epsilon subunit OS=Drosophila melanogaster GN=CG10489 PE=2 SV=1;tr|D3DMG0|D3DMG0_DROME FI13109p (Fragment)	4	3	3	58.758	525	7.9794	6.1	6.1	10.1	3720400	4701700	22921000
M9PGG0;M9PG88;M9PIL3;Q9VNS2;A8JNX0	tr|M9PGG0|M9PGG0_DROME ADP-ribosylation factor GTPase activating protein 3, isoform E OS=Drosophila melanogaster GN=ArfGAP3 PE=1 SV=1;tr|M9PG88|M9PG88_DROME ADP-ribosylation factor GTPase activating protein 3, isoform F OS=Drosophila melanogaster GN=ArfGAP	5	2	2	54.454	513	8.6959	6.6	0	6.6	3707200	0	14658000
Q9VSV2;Q86P29;A9LRV8	tr|Q9VSV2|Q9VSV2_DROME Transporter OS=Drosophila melanogaster GN=DmNAT3 PE=2 SV=2;tr|Q86P29|Q86P29_DROME Transporter OS=Drosophila melanogaster GN=CG4476 PE=2 SV=1;tr|A9LRV8|A9LRV8_DROME Transporter OS=Drosophila melanogaster GN=CG4476 PE=2 SV=1	3	1	1	69.778	629	-2	2.4	0	2.4	3696900	0	22746000
E1JHV7;M9PBG5;M9PE12;E1JHV6;M9PDH1;Q9W0T1	tr|E1JHV7|E1JHV7_DROME Enhancer of bithorax, isoform F OS=Drosophila melanogaster GN=E(bx) PE=1 SV=1;tr|M9PBG5|M9PBG5_DROME Enhancer of bithorax, isoform G OS=Drosophila melanogaster GN=E(bx) PE=1 SV=1;tr|M9PE12|M9PE12_DROME Enhancer of bithorax, isoform I	6	8	8	239.45	2139	21.967	1.1	3.8	4.3	3668800	20728000	88962000
Q24090	tr|Q24090|Q24090_DROME GH08712p OS=Drosophila melanogaster GN=Snr1 PE=1 SV=2	1	1	1	41.911	370	2.3597	3.5	0	3.5	3666300	0	10290000
Q9VD14	tr|Q9VD14|Q9VD14_DROME GH07286p OS=Drosophila melanogaster GN=GH07286p PE=1 SV=3	1	6	6	61.874	564	34.641	7.8	14.7	17.6	3665400	49616000	97445000
Q9VXI3;Q95TL8	tr|Q9VXI3|Q9VXI3_DROME CG9911, isoform C OS=Drosophila melanogaster GN=LD41494p PE=1 SV=1;tr|Q95TL8|Q95TL8_DROME CG9911, isoform A OS=Drosophila melanogaster GN=LD41494p PE=1 SV=1	2	2	2	43.348	375	3.994	5.9	5.9	5.9	3664800	10258000	16317000
Q9VDT4	tr|Q9VDT4|Q9VDT4_DROME CG4686, isoform A OS=Drosophila melanogaster GN=Dmel\CG4686 PE=4 SV=1	1	1	1	19.719	181	9.1849	9.4	0	9.4	3654000	0	12554000
Q9VVI0	tr|Q9VVI0|Q9VVI0_DROME SD09427p OS=Drosophila melanogaster GN=U4-U6-60K PE=1 SV=1	1	8	8	61.563	553	33.094	6.5	13.6	14.6	3634700	42748000	71922000
Q960W6	sp|Q960W6|FACR3_DROME Putative fatty acyl-CoA reductase CG8306 OS=Drosophila melanogaster GN=CG8306 PE=2 SV=1	1	2	2	58.466	516	4.2848	7.2	3.5	7.2	3626600	12743000	26196000
Q9V4C8	sp|Q9V4C8|HCF_DROME Host cell factor OS=Drosophila melanogaster GN=Hcf PE=1 SV=2	1	3	3	160.18	1500	11.147	1.7	1.7	3.3	3621700	10355000	15482000
Q9VXY9;Q8T8Q0	tr|Q9VXY9|Q9VXY9_DROME Opossum, isoform A OS=Drosophila melanogaster GN=opm PE=1 SV=2;tr|Q8T8Q0|Q8T8Q0_DROME SD08771p (Fragment) OS=Drosophila melanogaster GN=opm PE=2 SV=2	2	2	2	27.801	242	2.6364	3.7	9.1	0	3601300	0	0
Q8SY19;O97471	tr|Q8SY19|Q8SY19_DROME Microsomal glutathione S-transferase-like, isoform A OS=Drosophila melanogaster GN=Mgstl PE=1 SV=1;tr|O97471|O97471_DROME Microsomal glutathione S-transferase-like protein OS=Drosophila melanogaster GN=Mgstl PE=2 SV=1	2	1	1	16.867	152	4.0196	9.9	9.9	9.9	3592200	8412800	20108000
Q541C9;O76511	tr|Q541C9|Q541C9_DROME RE18955p OS=Drosophila melanogaster GN=Ts PE=1 SV=1;sp|O76511|TYSY_DROME Thymidylate synthase OS=Drosophila melanogaster GN=Ts PE=1 SV=2	2	1	1	36.656	321	13.698	4	4	4	3584600	12323000	32995000
Q9VZU4	tr|Q9VZU4|Q9VZU4_DROME LD25561p OS=Drosophila melanogaster GN=ND-30 PE=1 SV=1	1	2	2	29.971	265	4.3739	9.8	4.2	9.8	3569000	2972800	30134000
Q95R61;A0A0B4LFQ2;Q7JRJ9;Q8IGP7	tr|Q95R61|Q95R61_DROME SD04909p OS=Drosophila melanogaster GN=Incenp PE=2 SV=1;tr|A0A0B4LFQ2|A0A0B4LFQ2_DROME Inner centromere protein, isoform C OS=Drosophila melanogaster GN=Incenp PE=1 SV=1;tr|Q7JRJ9|Q7JRJ9_DROME Inner centromere protein, isoform A OS=D	4	1	1	35.146	310	2.2547	6.1	0	0	3566700	0	0
M9PH75;X2JEC4;A8JUZ9;M9MS17;M9PH82;A8JUZ8;M9PJ82;E2QD99;X2JIN0;M9MSA5;X2JDY1;A8JV00;M9PGT0;M9PDW8;A8JV02;Q3KN62;M9PDW3;M9PJ79;M9PGI5	tr|M9PH75|M9PH75_DROME Uncharacterized protein, isoform Q OS=Drosophila melanogaster GN=BcDNA:GH23906 PE=1 SV=1;tr|X2JEC4|X2JEC4_DROME Uncharacterized protein, isoform Y OS=Drosophila melanogaster GN=BcDNA:GH23906 PE=1 SV=1;tr|A8JUZ9|A8JUZ9_DROME Uncharact	19	12	12	357.39	3183	164.94	0.9	0.5	5.9	3548600	0	197360000
Q9VAX8;Q86NS3	tr|Q9VAX8|Q9VAX8_DROME CG4849 OS=Drosophila melanogaster GN=EFTUD2 PE=1 SV=1;tr|Q86NS3|Q86NS3_DROME RE71343p OS=Drosophila melanogaster GN=CG4849 PE=2 SV=1	2	11	11	110.65	975	53.912	2.4	14.2	10.6	3508900	54997000	91125000
Q9VMB9;Q86NN8	tr|Q9VMB9|Q9VMB9_DROME Cytochrome c oxidase subunit 5B, isoform A OS=Drosophila melanogaster GN=COX5B PE=1 SV=1;tr|Q86NN8|Q86NN8_DROME RH49324p (Fragment) OS=Drosophila melanogaster GN=COX5B PE=2 SV=1	2	1	1	13.579	120	2.3149	10.8	0	10.8	3494500	0	0
B7YZY9;Q9Y0H4	tr|B7YZY9|B7YZY9_DROME E3 ubiquitin-protein ligase OS=Drosophila melanogaster GN=Su(dx) PE=1 SV=1;sp|Q9Y0H4|SUDX_DROME E3 ubiquitin-protein ligase Su(dx) OS=Drosophila melanogaster GN=Su(dx) PE=1 SV=1	2	3	3	107.97	949	7.2303	1.7	2.7	3.1	3472500	19742000	24858000
H0RNI1;Q9V9A7	tr|H0RNI1|H0RNI1_DROME FI18111p1 OS=Drosophila melanogaster GN=CG3267-RA PE=2 SV=1;sp|Q9V9A7|MCCB_DROME Probable methylcrotonoyl-CoA carboxylase beta chain, mitochondrial OS=Drosophila melanogaster GN=l(2)04524 PE=2 SV=1	2	2	2	62.648	578	3.2361	2.1	2.1	4.3	3458300	15356000	29021000
Q8IP63;O97183	tr|Q8IP63|Q8IP63_DROME RH25219p OS=Drosophila melanogaster GN=RpII33 PE=2 SV=2;tr|O97183|O97183_DROME GH07456p OS=Drosophila melanogaster GN=RpII33 PE=1 SV=1	2	2	2	13.099	117	16.57	12	12	28.2	3448700	13190000	21710000
A0A0B4K6B8;A0A0B4K7A6;C7LAE7;Q86B87	tr|A0A0B4K6B8|A0A0B4K6B8_DROME Modifier of mdg4, isoform AE OS=Drosophila melanogaster GN=mod(mdg4) PE=1 SV=1;tr|A0A0B4K7A6|A0A0B4K7A6_DROME Modifier of mdg4, isoform AD OS=Drosophila melanogaster GN=mod(mdg4) PE=1 SV=1;tr|C7LAE7|C7LAE7_DROME MIP06802p OS=	4	2	2	52.406	479	4.4689	6.3	6.3	6.3	3442700	8695500	40184000
Q9VBU5	tr|Q9VBU5|Q9VBU5_DROME LD07939p OS=Drosophila melanogaster GN=Dmel\CG10425 PE=1 SV=1	1	1	1	36.569	336	2.811	3.9	3.9	3.9	3441500	9364100	12609000
Q9VL96	sp|Q9VL96|PESC_DROME Pescadillo homolog OS=Drosophila melanogaster GN=CG4364 PE=1 SV=1	1	6	6	73.862	627	30.099	3.5	12.1	16.4	3420500	59544000	57779000
Q9VEP6;Q95SP9	tr|Q9VEP6|Q9VEP6_DROME Adenylosuccinate lyase OS=Drosophila melanogaster GN=AdSL PE=1 SV=1;tr|Q95SP9|Q95SP9_DROME Adenylosuccinate lyase OS=Drosophila melanogaster GN=AdSL PE=2 SV=1	2	5	5	53.797	481	12.647	1.5	10.6	10.8	3419300	79870000	135080000
P40304	sp|P40304|PSB1_DROME Proteasome subunit beta type-1 OS=Drosophila melanogaster GN=Prosbeta6 PE=2 SV=2	1	3	3	25.842	235	9.2974	8.5	0	22.6	3406300	0	32196000
Q962I2;P48555	tr|Q962I2|Q962I2_DROME RAL2 OS=Drosophila melanogaster GN=Rala PE=1 SV=1;sp|P48555|RALA_DROME Ras-related protein Ral-a OS=Drosophila melanogaster GN=Rala PE=1 SV=2	2	2	2	22.436	197	2.7319	7.6	0	12.7	3394400	0	17946000
Q9VC94	tr|Q9VC94|Q9VC94_DROME CG5728 OS=Drosophila melanogaster GN=Dmel\CG5728 PE=1 SV=2	1	10	10	159.8	1430	24.901	2	9.1	2.6	3391100	92874000	27554000
Q9XZ34;Q4V5E2	tr|Q9XZ34|Q9XZ34_DROME Rap1 interacting factor 1 OS=Drosophila melanogaster GN=Rif1 PE=1 SV=1;tr|Q4V5E2|Q4V5E2_DROME RE66338p OS=Drosophila melanogaster GN=CG30085 PE=2 SV=1	2	4	4	156.82	1416	8.8257	1.7	0.5	3.2	3389400	2218300	19796000
Q9NCC3	tr|Q9NCC3|Q9NCC3_DROME Sorting nexin OS=Drosophila melanogaster GN=SH3PX1 PE=1 SV=1	1	10	10	63.166	565	25.747	6.2	17.9	14.3	3372000	27841000	114130000
Q9V4P1	sp|Q9V4P1|ANLN_DROME Anillin OS=Drosophila melanogaster GN=scra PE=1 SV=3	1	1	1	136.03	1239	3.4991	1.9	0	0	3371200	0	0
Q9VRL2	sp|Q9VRL2|GOSR2_DROME Probable Golgi SNAP receptor complex member 2 OS=Drosophila melanogaster GN=Membrin PE=2 SV=1	1	3	3	24.833	216	6.5725	5.6	18.1	10.2	3371000	22066000	28852000
H0RNN8;Q9VLK2	tr|H0RNN8|H0RNN8_DROME FI17503p1 OS=Drosophila melanogaster GN=CG13096-RA PE=1 SV=1;sp|Q9VLK2|Y3096_DROME Ribosomal L1 domain-containing protein CG13096 OS=Drosophila melanogaster GN=CG13096 PE=1 SV=1	2	7	7	74.363	681	8.9116	1.3	12.3	8.1	3341900	63597000	44600000
Q960M5;Q9VDS7;A0A0B4LID7	tr|Q960M5|Q960M5_DROME LD45279p OS=Drosophila melanogaster GN=CG4538 PE=2 SV=1;tr|Q9VDS7|Q9VDS7_DROME CG4538, isoform A OS=Drosophila melanogaster GN=ClpX PE=1 SV=2;tr|A0A0B4LID7|A0A0B4LID7_DROME CG4538, isoform C OS=Drosophila melanogaster GN=ClpX PE=1 SV	3	2	2	51.081	478	4.3191	2.3	2.3	4.6	3324900	9772800	26264000
Q0E9G4;G3LFI2;G3LFG9;Q961L4	tr|Q0E9G4|Q0E9G4_DROME CG1600-PA OS=Drosophila melanogaster GN=Drat PE=1 SV=1;tr|G3LFI2|G3LFI2_DROME CG1600-PA OS=Drosophila melanogaster GN=CG1600 PE=4 SV=1;tr|G3LFG9|G3LFG9_DROME CG1600-PA OS=Drosophila melanogaster GN=CG1600 PE=4 SV=1;tr|Q961L4|Q961L4_D	4	1	1	41.387	381	3.1149	7.1	7.1	7.1	3317500	1272300	3317300
P54622	sp|P54622|SSBP_DROME Single-stranded DNA-binding protein, mitochondrial OS=Drosophila melanogaster GN=mtSSB PE=1 SV=2	1	7	7	16.367	146	45.15	9.6	43.2	15.8	3316800	113180000	39969000
Q8T0B0;A1ZAT5;A8WHL6;H1UUM7	tr|Q8T0B0|Q8T0B0_DROME LD14485p OS=Drosophila melanogaster GN=Tes PE=2 SV=1;tr|A1ZAT5|A1ZAT5_DROME Testin ortholog OS=Drosophila melanogaster GN=Tes PE=1 SV=1;tr|A8WHL6|A8WHL6_DROME RE57334p (Fragment) OS=Drosophila melanogaster GN=CG6522 PE=2 SV=1;tr|H1UU	4	2	2	66.548	604	20.21	4.8	3.5	4.8	3310900	4985500	53669000
Q9W3F5	tr|Q9W3F5|Q9W3F5_DROME GH02722p OS=Drosophila melanogaster GN=Dmel\CG12123 PE=2 SV=1	1	4	4	25.93	218	11.043	6	18.8	10.1	3267800	30178000	17916000
J9XXX0;Q9VF02;Q71V44;K4MNB1;Q86NV8	tr|J9XXX0|J9XXX0_DROME SD05972p1 (Fragment) OS=Drosophila melanogaster GN=Hel89B-RB PE=2 SV=1;tr|Q9VF02|Q9VF02_DROME Helicase 89B, isoform B OS=Drosophila melanogaster GN=Hel89B PE=1 SV=3;tr|Q71V44|Q71V44_DROME 89B helicase OS=Drosophila melanogaster GN=He	5	2	2	207.07	1869	19.402	1	1	1.7	3249600	5038700	20911000
Q9VMY9	sp|Q9VMY9|GUAD_DROME Guanine deaminase OS=Drosophila melanogaster GN=DhpD PE=1 SV=1	1	3	3	48.884	448	6.5636	3.6	3.6	8.9	3224700	5086700	30545000
Q8SY53	tr|Q8SY53|Q8SY53_DROME GH11935p OS=Drosophila melanogaster GN=Ostgamma PE=1 SV=1	1	2	2	37.01	330	3.1165	5.8	3.3	3.3	3222600	18004000	22301000
Q9VFT4;Q9NH72	tr|Q9VFT4|Q9VFT4_DROME AT27578p OS=Drosophila melanogaster GN=rin PE=1 SV=1;tr|Q9NH72|Q9NH72_DROME Rasputin OS=Drosophila melanogaster GN=rin PE=2 SV=1	2	3	3	74.942	690	13.22	1.2	2.6	5.5	3191700	5291400	53693000
E4NKG1;Q9I7D3	tr|E4NKG1|E4NKG1_DROME Caprin, isoform B OS=Drosophila melanogaster GN=Capr PE=1 SV=1;sp|Q9I7D3|CAPR1_DROME Caprin homolog OS=Drosophila melanogaster GN=Capr PE=1 SV=1	2	5	5	103.59	961	26.927	4	2.2	5	3179800	11075000	60624000
Q8MT27;M9WDW1;A0A0C5K8A0;P34739	tr|Q8MT27|Q8MT27_DROME RE70645p OS=Drosophila melanogaster GN=lds PE=2 SV=1;tr|M9WDW1|M9WDW1_DROME FI21104p1 OS=Drosophila melanogaster GN=lds-RA PE=2 SV=1;tr|A0A0C5K8A0|A0A0C5K8A0_DROME FI21128p1 OS=Drosophila melanogaster GN=lds-RA PE=2 SV=1;sp|P34739|TT	4	6	6	93.762	835	11.571	3.8	0	8.9	3176600	0	46087000
C8VV03;Q7KRW8	tr|C8VV03|C8VV03_DROME RE67017p OS=Drosophila melanogaster GN=CG1646-RC PE=2 SV=1;sp|Q7KRW8|PRP39_DROME Pre-mRNA-processing factor 39 OS=Drosophila melanogaster GN=CG1646 PE=1 SV=1	2	2	2	59.553	511	4.533	4.5	1.4	1.4	3146600	1959500	4428900
Q9VAN8	tr|Q9VAN8|Q9VAN8_DROME FI15955p1 OS=Drosophila melanogaster GN=Dmel\CG11882 PE=1 SV=1	1	1	1	29.698	263	2.7079	7.6	0	0	3128300	0	0
Q8MYY9;Q95S36;Q9VYE3	tr|Q8MYY9|Q8MYY9_DROME RE44143p OS=Drosophila melanogaster GN=CG15747 PE=2 SV=1;tr|Q95S36|Q95S36_DROME GM10183p OS=Drosophila melanogaster GN=CG15747 PE=2 SV=1;tr|Q9VYE3|Q9VYE3_DROME FI21110p1 OS=Drosophila melanogaster GN=Dmel\CG15747 PE=1 SV=2	3	4	4	28.473	248	10.519	10.5	4.8	20.6	3121000	3476600	153090000
P21914	sp|P21914|SDHB_DROME Succinate dehydrogenase [ubiquinone] iron-sulfur subunit, mitochondrial OS=Drosophila melanogaster GN=SdhB PE=2 SV=2	1	3	3	33.741	297	4.4268	7.1	6.7	9.8	3119900	9841900	30812000
E1JIH5;Q8MSX2	tr|E1JIH5|E1JIH5_DROME Mediator of RNA polymerase II transcription subunit 6 OS=Drosophila melanogaster GN=MED6 PE=1 SV=1;sp|Q8MSX2|MED6_DROME Mediator of RNA polymerase II transcription subunit 6 OS=Drosophila melanogaster GN=MED6 PE=1 SV=1	2	2	2	28.374	249	5.3669	4.4	4.4	12.4	3118600	6933900	14062000
Q0IGW6;M9ND86;A0A024E347;P43248	tr|Q0IGW6|Q0IGW6_DROME RE64551p OS=Drosophila melanogaster GN=spel1 PE=2 SV=1;tr|M9ND86|M9ND86_DROME Spellchecker1, isoform D OS=Drosophila melanogaster GN=spel1 PE=1 SV=1;tr|A0A024E347|A0A024E347_DROME FI23518p1 (Fragment) OS=Drosophila melanogaster GN=sp	4	3	3	103.34	917	10.014	2.4	3.7	3.7	3112700	17796000	25658000
Q7JWD3	sp|Q7JWD3|ASNA_DROME ATPase ASNA1 homolog OS=Drosophila melanogaster GN=CG1598 PE=2 SV=1	1	1	1	37.581	336	2.1006	3	3	3	3096400	13325000	8016300
Q5BI36;Q8SY24;Q7PLP4;A8Y582;Q7PLP5	tr|Q5BI36|Q5BI36_DROME LD32875p OS=Drosophila melanogaster GN=CG41099 PE=2 SV=1;tr|Q8SY24|Q8SY24_DROME RE06111p OS=Drosophila melanogaster GN=CG17419 PE=2 SV=1;tr|Q7PLP4|Q7PLP4_DROME Uncharacterized protein, isoform B OS=Drosophila melanogaster GN=BEST:GM1	5	3	3	92.897	843	9.6777	4.4	0	5.9	3091100	0	30732000
Q7K2L7	tr|Q7K2L7|Q7K2L7_DROME GH27120p OS=Drosophila melanogaster GN=CG17765 PE=1 SV=1	1	1	1	22.491	199	2.9745	5.5	5.5	5.5	3088100	3425500	10199000
Q9VC05;O18397	tr|Q9VC05|Q9VC05_DROME Oxysterol-binding protein OS=Drosophila melanogaster GN=Osbp PE=1 SV=1;tr|O18397|O18397_DROME Oxysterol-binding protein OS=Drosophila melanogaster GN=Osbp PE=2 SV=2	2	2	2	89.324	784	4.4949	3.1	0	1	3065300	0	13279000
A0A0B4KH25;P08985	tr|A0A0B4KH25|A0A0B4KH25_DROME Histone H2A OS=Drosophila melanogaster GN=His2Av PE=3 SV=1;sp|P08985|H2AV_DROME Histone H2A.v OS=Drosophila melanogaster GN=His2Av PE=1 SV=2	2	5	3	14.981	141	34.619	27	48.9	31.9	3061600	93573000	5451900
T2GGB6;Q9W088	tr|T2GGB6|T2GGB6_DROME FI21646p1 OS=Drosophila melanogaster GN=CG12018-RA PE=2 SV=1;sp|Q9W088|DPOD2_DROME DNA polymerase delta small subunit OS=Drosophila melanogaster GN=CG12018 PE=2 SV=1	2	5	5	48.008	431	14.227	3.9	13.9	10.9	3061100	37655000	21820000
A0A0B4KGJ1;P54359;C7LAA7;Q7KLG8	tr|A0A0B4KGJ1|A0A0B4KGJ1_DROME Septin 2, isoform B OS=Drosophila melanogaster GN=Sep2 PE=3 SV=1;sp|P54359|SEPT2_DROME Septin-2 OS=Drosophila melanogaster GN=Sep2 PE=2 SV=2;tr|C7LAA7|C7LAA7_DROME RE03077p OS=Drosophila melanogaster GN=Sep5-RB PE=2 SV=1;tr|Q	4	2	2	42.011	360	4.5593	2.5	5.3	7.8	3055300	10293000	38660000
A0A0B4LHC1;B5RIZ2;Q9VDS5;A0A0B4LHN0;A0A0B4LHC3	tr|A0A0B4LHC1|A0A0B4LHC1_DROME Rho GTPase activating protein at 92B, isoform B OS=Drosophila melanogaster GN=RhoGAP92B PE=1 SV=1;tr|B5RIZ2|B5RIZ2_DROME FI06314p OS=Drosophila melanogaster GN=RhoGAP92B PE=1 SV=1;sp|Q9VDS5|RG92B_DROME Rho GTPase-activating p	5	4	4	82.955	739	9.4179	2.4	3.5	7.8	3050700	18526000	83624000
Q9VVU5	sp|Q9VVU5|CSN1_DROME COP9 signalosome complex subunit 1b OS=Drosophila melanogaster GN=CSN1b PE=2 SV=1	1	1	1	58.214	525	3.0407	2.3	2.3	2.3	3048300	7958800	12799000
Q8T9D1;Q86BS3;Q5MAI1	tr|Q8T9D1|Q8T9D1_DROME SD06626p OS=Drosophila melanogaster GN=Chro PE=2 SV=1;tr|Q86BS3|Q86BS3_DROME Chromator, isoform A OS=Drosophila melanogaster GN=Chro PE=1 SV=1	3	3	3	101.09	926	3.5207	3	3	4.3	3045700	7017400	42177000
E3CTT3;Q95SP1;Q9VHV3;Q5U162	tr|E3CTT3|E3CTT3_DROME RT10411p (Fragment) OS=Drosophila melanogaster GN=CG7800-RA PE=2 SV=1;tr|Q95SP1|Q95SP1_DROME GH11496p OS=Drosophila melanogaster GN=CG7800 PE=2 SV=1;tr|Q9VHV3|Q9VHV3_DROME CG7800 OS=Drosophila melanogaster GN=CT23295 PE=1 SV=2;tr|Q5U	4	2	2	51.859	458	3.8585	3.1	5.2	2.2	3017400	3629500	0
Q9VZV8	tr|Q9VZV8|Q9VZV8_DROME LD46404p OS=Drosophila melanogaster GN=Dmel\CG16753 PE=2 SV=1	1	3	3	20.576	177	10.542	6.2	18.6	18.6	2969500	35729000	46363000
B5X0M9;Q9VA00	tr|B5X0M9|B5X0M9_DROME RE71749p (Fragment) OS=Drosophila melanogaster GN=zwilch-RA PE=2 SV=1;sp|Q9VA00|ZWILC_DROME Protein zwilch OS=Drosophila melanogaster GN=Zwilch PE=1 SV=1	2	2	2	74.045	654	4.4397	2.4	0	2.4	2966200	0	10956000
X2J9R2;Q9V3D2	tr|X2J9R2|X2J9R2_DROME Coproporphyrinogen oxidase, isoform B OS=Drosophila melanogaster GN=Coprox PE=4 SV=1;sp|Q9V3D2|HEM6_DROME Oxygen-dependent coproporphyrinogen-III oxidase OS=Drosophila melanogaster GN=Coprox PE=2 SV=1	2	3	3	44.419	390	7.5845	7.7	10	2.8	2937800	19469000	9164200
Q86P66;Q8SZF5;Q9VPJ9;Q8IPV3	tr|Q86P66|Q86P66_DROME RH38575p OS=Drosophila melanogaster GN=BEST:CK02656 PE=2 SV=1;tr|Q8SZF5|Q8SZF5_DROME RE02452p OS=Drosophila melanogaster GN=BEST:CK02656 PE=2 SV=1;tr|Q9VPJ9|Q9VPJ9_DROME CG3164, isoform B OS=Drosophila melanogaster GN=BEST:CK02656 PE	4	1	1	57.319	517	2.5079	2.1	2.1	2.1	2930300	8066100	0
Q9VDE3;O44382;A0A0B4KHK1	tr|Q9VDE3|Q9VDE3_DROME LD08669p OS=Drosophila melanogaster GN=slmb PE=1 SV=1;tr|O44382|O44382_DROME Slimb OS=Drosophila melanogaster GN=slmb PE=2 SV=1;tr|A0A0B4KHK1|A0A0B4KHK1_DROME Supernumerary limbs, isoform B OS=Drosophila melanogaster GN=slmb PE=4 SV=	3	4	4	58.952	510	6.8701	6.3	1.8	6.1	2930300	4097500	22070000
Q9VCY1;B7FNI7;Q8SYV4	tr|Q9VCY1|Q9VCY1_DROME CG6937 OS=Drosophila melanogaster GN=Dmel\CG6937 PE=1 SV=1;tr|B7FNI7|B7FNI7_DROME FI03269p (Fragment) OS=Drosophila melanogaster GN=CG6937-RA PE=2 SV=1	3	3	3	39.561	356	11.473	3.9	0	13.2	2920700	0	45066000
M9NDW2;Q76NQ9;Q6NP70;Q961Q7;Q9VY76;Q76NR0;D0IQK3;X2JFA0;M9MS55;X2JEY5	tr|M9NDW2|M9NDW2_DROME AMP deaminase, isoform I OS=Drosophila melanogaster GN=AMPdeam PE=1 SV=1;tr|Q76NQ9|Q76NQ9_DROME AMP deaminase OS=Drosophila melanogaster GN=AMPdeam PE=1 SV=2;tr|Q6NP70|Q6NP70_DROME RE05438p OS=Drosophila melanogaster GN=CG32626 PE=2	10	1	1	29.073	258	5.553	7	0	7	2915500	0	19743000
Q9VYK8	tr|Q9VYK8|Q9VYK8_DROME Apoptosis and caspase activation inhibitor, isoform A OS=Drosophila melanogaster GN=Aven PE=1 SV=1	1	1	1	31.828	294	4.8136	8.2	0	8.2	2881700	0	20604000
Q9W1I8	tr|Q9W1I8|Q9W1I8_DROME LD03592p OS=Drosophila melanogaster GN=Snap29 PE=1 SV=1	1	2	2	31.595	284	14.839	4.6	4.6	7.4	2878100	5305500	17471000
Q9VNH2;E8NH36;Q86P00	tr|Q9VNH2|Q9VNH2_DROME CG2100, isoform A OS=Drosophila melanogaster GN=Dmel\CG2100 PE=1 SV=1	3	3	3	55.37	477	9.0758	5.2	8	5.2	2870300	12054000	10956000
P48592	sp|P48592|RIR2_DROME Ribonucleoside-diphosphate reductase subunit M2 OS=Drosophila melanogaster GN=RnrS PE=1 SV=2	1	2	2	45.114	393	5.6804	6.4	3.6	6.4	2865600	5189800	31125000
Q9GQ89;Q9VAD4	tr|Q9GQ89|Q9GQ89_DROME Eukaryotic initiation factor eIF2B alpha subunit OS=Drosophila melanogaster GN=eIF2Balpha PE=2 SV=1;tr|Q9VAD4|Q9VAD4_DROME HL01112p OS=Drosophila melanogaster GN=eIF2Balpha PE=1 SV=1	2	2	2	33.726	300	2.8649	7.3	0	4	2863500	0	0
Q9VMW1;C6TP45	tr|Q9VMW1|Q9VMW1_DROME Reticulon-like protein OS=Drosophila melanogaster GN=Rtnl1 PE=1 SV=2;tr|C6TP45|C6TP45_DROME Reticulon-like protein OS=Drosophila melanogaster GN=Rtnl1-RD PE=2 SV=1	2	3	1	24.92	224	15.248	21.9	21.9	12.9	2854900	7574800	27674000
M9PF85;Q7JVP2	tr|M9PF85|M9PF85_DROME Required for cell differentiation 1, isoform C OS=Drosophila melanogaster GN=Rcd-1 PE=1 SV=1;tr|Q7JVP2|Q7JVP2_DROME GH15157p OS=Drosophila melanogaster GN=Rcd-1 PE=1 SV=1	2	2	2	33.814	301	6.1104	9.6	0	0	2847500	0	0
C3KGI3;A1Z9G2	tr|C3KGI3|C3KGI3_DROME RE06860p OS=Drosophila melanogaster GN=CG6197-RA PE=2 SV=1;tr|A1Z9G2|A1Z9G2_DROME FI18620p1 OS=Drosophila melanogaster GN=fand PE=1 SV=1	2	4	4	103.35	883	10.58	2.5	2.3	5.1	2839700	9460300	29901000
Q29QY3	tr|Q29QY3|Q29QY3_DROME IP15837p OS=Drosophila melanogaster PE=2 SV=1	1	1	1	22.612	202	3.0518	7.9	7.9	7.9	2838200	14986000	9373000
O76268;Q9VQI8;D5AEL4;M9PBV2;Q8IPZ6	tr|O76268|O76268_DROME LD11641p OS=Drosophila melanogaster GN=NTPase PE=1 SV=1;tr|Q9VQI8|Q9VQI8_DROME FI18627p1 OS=Drosophila melanogaster GN=NTPase PE=1 SV=1;tr|D5AEL4|D5AEL4_DROME RE08887p OS=Drosophila melanogaster PE=2 SV=1;tr|M9PBV2|M9PBV2_DROME NTPas	5	4	4	50.845	461	11.423	5.2	13.7	5.2	2804600	16898000	21475000
A0A0B4JD39;P17789	tr|A0A0B4JD39|A0A0B4JD39_DROME Tramtrack, isoform H OS=Drosophila melanogaster GN=ttk PE=4 SV=1;sp|P17789|TTKB_DROME Protein tramtrack, beta isoform OS=Drosophila melanogaster GN=ttk PE=1 SV=2	2	1	1	68.77	643	2.9254	3.6	0	0	2800400	0	0
A1Z6E6;A0A0B4KEC3;Q7K3G5	tr|A1Z6E6|A1Z6E6_DROME D4, isoform C OS=Drosophila melanogaster GN=d4 PE=1 SV=1;tr|A0A0B4KEC3|A0A0B4KEC3_DROME D4, isoform D OS=Drosophila melanogaster GN=d4 PE=1 SV=1;tr|Q7K3G5|Q7K3G5_DROME D4, isoform A OS=Drosophila melanogaster GN=d4 PE=1 SV=1	3	2	2	55.12	495	4.9585	2.2	4.4	2.2	2797800	6447300	18855000
Q9VFB5	tr|Q9VFB5|Q9VFB5_DROME IP02321p OS=Drosophila melanogaster GN=Rpb7 PE=1 SV=2	1	2	2	19.107	173	3.2418	6.4	13.9	6.4	2781600	17684000	14289000
A4V3G8;Q7KRY6	tr|A4V3G8|A4V3G8_DROME Ballchen, isoform B OS=Drosophila melanogaster GN=ball PE=1 SV=1;sp|Q7KRY6|NHK1_DROME Nucleosomal histone kinase 1 OS=Drosophila melanogaster GN=ball PE=1 SV=1	2	1	1	65.993	599	2.3496	2	2	2	2762800	7236500	9192700
Q9W3M7	tr|Q9W3M7|Q9W3M7_DROME LD32873p OS=Drosophila melanogaster GN=mahe PE=1 SV=1	1	3	2	100.42	945	2.5121	3.2	0	3.2	2758200	0	28548000
E1JHM5;E0R948;Q9I7L8;B8A417	tr|E1JHM5|E1JHM5_DROME Uncharacterized protein, isoform B OS=Drosophila melanogaster GN=CG31687-PA PE=4 SV=1;tr|E0R948|E0R948_DROME MIP23949p (Fragment) OS=Drosophila melanogaster GN=CG31688-RC PE=2 SV=1;tr|Q9I7L8|Q9I7L8_DROME Cell division cycle 23, isofo	4	1	1	40.816	351	2.0369	2.8	2.8	2.8	2720000	2925700	7923300
A0A075BJ02;A0A075BIZ6;A0A075BLM9;A0A075BLM7;A0A075BJK0;A0A075BJJ3;A0A075BJ54;A0A075BJ51;A0A075BIZ9;A0A075BIZ4;A0A075BHV8;A0A075BHV6;A0A075BHW2;A0A075BLM5;A0A075BJJ9;A0A075BJ63;A0A075BLM0	tr|A0A075BJ02|A0A075BJ02_DROME Female sterile (1) Yb OS=Drosophila melanogaster GN=fs(1)Yb PE=4 SV=1;tr|A0A075BIZ6|A0A075BIZ6_DROME Female sterile (1) Yb OS=Drosophila melanogaster GN=fs(1)Yb PE=4 SV=1;tr|A0A075BLM9|A0A075BLM9_DROME Female sterile (1) Yb O	17	15	1	116.71	1036	3.756	8.1	0	18.3	2718700	0	39047000
X2J5E8;Q9VL78	tr|X2J5E8|X2J5E8_DROME Peptidylprolyl isomerase OS=Drosophila melanogaster GN=FKBP59 PE=4 SV=1;sp|Q9VL78|FKB59_DROME FK506-binding protein 59 OS=Drosophila melanogaster GN=FKBP59 PE=1 SV=1	2	1	1	48.795	439	1.9899	3	3	3	2689900	6466900	0
Q8IRD2;Q8IH35;Q9Y172;Q9VZQ1	tr|Q8IRD2|Q8IRD2_DROME YT521-B, isoform B OS=Drosophila melanogaster GN=Ythdc1 PE=1 SV=1;tr|Q8IH35|Q8IH35_DROME GH27257p (Fragment) OS=Drosophila melanogaster GN=Ythdc1 PE=2 SV=1;tr|Q9Y172|Q9Y172_DROME BcDNA.GH01918 OS=Drosophila melanogaster GN=Ythdc1 PE=	4	1	1	75.007	710	3.9277	2.5	2.5	2.5	2688300	10949000	11081000
Q9VP57	tr|Q9VP57|Q9VP57_DROME LD15904p OS=Drosophila melanogaster GN=pzg PE=1 SV=1	1	9	9	105.08	996	36.783	4.5	5.9	13.8	2685300	18526000	153300000
Q9VGG9;Q7KSN8;Q8MSA2;Q8MQK8	tr|Q9VGG9|Q9VGG9_DROME RE35509p OS=Drosophila melanogaster GN=Dmel\CG31368 PE=1 SV=4;tr|Q7KSN8|Q7KSN8_DROME Uncharacterized protein, isoform D OS=Drosophila melanogaster GN=Dmel\CG31368 PE=1 SV=2	4	3	3	172	1483	5.8984	0.8	2.7	0.8	2642200	8784300	11386000
Q9W5W6	tr|Q9W5W6|Q9W5W6_DROME CG9578 OS=Drosophila melanogaster GN=Dmel\CG9578 PE=1 SV=2	1	1	1	32.337	272	3.3593	5.9	5.9	5.9	2638400	4743500	12296000
Q9VZI3;Q9VVD2	sp|Q9VZI3|UN112_DROME Unc-112-related protein OS=Drosophila melanogaster GN=Fit1 PE=1 SV=1;tr|Q9VVD2|Q9VVD2_DROME Fermitin 2 OS=Drosophila melanogaster GN=Fit2 PE=2 SV=1	2	2	2	80.496	708	3.854	1.3	1.3	3.4	2630000	2255400	36556000
Q9VUQ1;Q95RY2	tr|Q9VUQ1|Q9VUQ1_DROME CG7945, isoform B OS=Drosophila melanogaster GN=Dmel\CG7945 PE=1 SV=2;tr|Q95RY2|Q95RY2_DROME CG7945, isoform A OS=Drosophila melanogaster GN=Dmel\CG7945 PE=1 SV=1	2	1	1	28.379	248	3.3244	4.4	4.4	4.4	2628700	4962700	23702000
A0A0B4LGC6;Q8MLS7;A0A0B4LG95;Q7K274	tr|A0A0B4LGC6|A0A0B4LGC6_DROME Lethal (2) k09913, isoform G OS=Drosophila melanogaster GN=l(2)k09913 PE=1 SV=1;tr|Q8MLS7|Q8MLS7_DROME Lethal (2) k09913, isoform D OS=Drosophila melanogaster GN=l(2)k09913 PE=1 SV=1;tr|A0A0B4LG95|A0A0B4LG95_DROME Lethal (2)	4	1	1	33.302	288	2.8609	7.3	0	7.3	2618000	0	11395000
Q9VB10	tr|Q9VB10|Q9VB10_DROME CG5590 OS=Drosophila melanogaster GN=Dmel\CG5590 PE=1 SV=1	1	3	3	44.354	412	20.545	5.6	0	12.1	2570600	0	29317000
A0A0B4JD46;Q8T8R1	tr|A0A0B4JD46|A0A0B4JD46_DROME CG3800, isoform B OS=Drosophila melanogaster GN=CNBP PE=2 SV=1;sp|Q8T8R1|Y3800_DROME CCHC-type zinc finger protein CG3800 OS=Drosophila melanogaster GN=CG3800 PE=1 SV=1	2	4	4	17.615	165	27.635	7.3	18.2	33.3	2569600	14452000	121230000
Q9W254;O44432	tr|Q9W254|Q9W254_DROME Quaking related 58E-2, isoform A OS=Drosophila melanogaster GN=qkr58E-2 PE=1 SV=1;tr|O44432|O44432_DROME QKR58E-2 OS=Drosophila melanogaster GN=qkr58E-2 PE=2 SV=1	2	4	4	44.144	416	8.648	2.4	2.2	12.3	2569500	3645300	84614000
Q7JYX5	tr|Q7JYX5|Q7JYX5_DROME RH15778p OS=Drosophila melanogaster GN=Vamp7 PE=1 SV=1	1	1	1	24.942	218	2.4768	5.5	0	0	2569000	0	0
O61345	sp|O61345|PENG_DROME Protein penguin OS=Drosophila melanogaster GN=peng PE=2 SV=1	1	4	4	81.301	737	7.5238	3.7	5.4	5.7	2559700	14370000	37965000
Q8I937;Q5U108;Q8MR24;C0MJR6;A0APD6;A0APD3;A0APD1;A0APD0;A0APC8	tr|Q8I937|Q8I937_DROME Ribosome biogenesis regulatory protein OS=Drosophila melanogaster GN=BcDNA:LD24586 PE=1 SV=2;tr|Q5U108|Q5U108_DROME Ribosome biogenesis regulatory protein (Fragment) OS=Drosophila melanogaster GN=CG32409 PE=2 SV=1;tr|Q8MR24|Q8MR24_DR	9	4	4	39.454	349	42.242	6.3	14.6	17.5	2531900	45924000	81839000
X5D3H6;A0A0B4KFL0;A0A0B4K851;C4IY22;A0A126GUM4;Q4Z8K6	tr|X5D3H6|X5D3H6_DROME FI24005p1 OS=Drosophila melanogaster GN=RanBPM-RC PE=2 SV=1;tr|A0A0B4KFL0|A0A0B4KFL0_DROME Ran-binding protein M, isoform F OS=Drosophila melanogaster GN=RanBPM PE=1 SV=1;tr|A0A0B4K851|A0A0B4K851_DROME Ran-binding protein M, isoform	6	1	1	66.42	598	5.6809	2.5	0	2.5	2529200	0	0
Q9VZU7	tr|Q9VZU7|Q9VZU7_DROME Ubiquitinyl hydrolase 1 OS=Drosophila melanogaster GN=Usp5 PE=1 SV=1	1	1	1	92.091	827	3.5447	2.5	2.5	2.5	2523800	7481300	0
Q9GV40;Q9VCN1;G3M399;Q95R46	tr|Q9GV40|Q9GV40_DROME DNA polymerase epsilon OS=Drosophila melanogaster GN=DNApol-epsilon255 PE=4 SV=1;tr|Q9VCN1|Q9VCN1_DROME DNA polymerase epsilon 255kD subunit OS=Drosophila melanogaster GN=DNApol-epsilon255 PE=1 SV=3;tr|G3M399|G3M399_DROME DNApol-epsi	4	3	3	255.02	2220	10.436	1.1	0.5	1.9	2511500	0	28725000
A8Y589;Q8SYT2	tr|A8Y589|A8Y589_DROME Apoptosis-linked gene-2 OS=Drosophila melanogaster GN=Alg-2 PE=1 SV=2;tr|Q8SYT2|Q8SYT2_DROME RE34768p (Fragment) OS=Drosophila melanogaster GN=Alg-2 PE=2 SV=2	2	1	1	20.765	178	3.8805	15.2	0	0	2501700	0	0
Q9VXM4	tr|Q9VXM4|Q9VXM4_DROME LD12946p OS=Drosophila melanogaster GN=MSBP PE=1 SV=1	1	2	2	27.92	248	4.9631	12.1	0	5.6	2500000	0	21904000
Q7K519	tr|Q7K519|Q7K519_DROME GH16429p OS=Drosophila melanogaster GN=RagC-D PE=1 SV=1	1	3	3	43.965	385	5.5512	2.6	7.3	7.3	2495700	16134000	38474000
B9EQU6;A0A0B4K807;D3DN03;A0A0B4K7R5;D3DMK9;E1JH79;C0PUX0;Q9NKV0	tr|B9EQU6|B9EQU6_DROME MIP01764p (Fragment) OS=Drosophila melanogaster GN=Mlf-RC PE=2 SV=1;tr|A0A0B4K807|A0A0B4K807_DROME Myelodysplasia/myeloid leukemia factor, isoform G OS=Drosophila melanogaster GN=Mlf PE=1 SV=1;tr|D3DN03|D3DN03_DROME AT03418p OS=Droso	8	1	1	29.506	266	4.7393	7.9	0	7.9	2484300	0	10829000
Q7JRH5	tr|Q7JRH5|Q7JRH5_DROME CG5726 OS=Drosophila melanogaster GN=CG5726 PE=1 SV=1	1	3	3	86.591	766	10.941	4.3	2.6	4.4	2465000	4127500	29782000
X2JBJ9;Q9VYG1	tr|X2JBJ9|X2JBJ9_DROME Uncharacterized protein, isoform B OS=Drosophila melanogaster GN=12096 PE=1 SV=1;sp|Q9VYG1|PSMD5_DROME 26S proteasome non-ATPase regulatory subunit 5 OS=Drosophila melanogaster GN=CG12096 PE=1 SV=3	2	2	2	56.667	506	4.6364	4.7	2.4	2.4	2442500	6238600	20225000
Q9VWD0	tr|Q9VWD0|Q9VWD0_DROME GH23568p OS=Drosophila melanogaster GN=parvin PE=1 SV=2	1	2	2	41.863	367	5.1771	4.1	0	8.7	2441300	0	21523000
Q9VPW9;Q8MRS6	tr|Q9VPW9|Q9VPW9_DROME CG4552 OS=Drosophila melanogaster GN=Dmel\CG4552 PE=1 SV=2;tr|Q8MRS6|Q8MRS6_DROME AT03044p OS=Drosophila melanogaster GN=CG4552 PE=2 SV=1	2	2	2	77.471	689	6.2556	2.2	2.2	3.6	2441000	2678400	54161000
Q9VLB7;Q24349	tr|Q9VLB7|Q9VLB7_DROME Rab GDP dissociation inhibitor OS=Drosophila melanogaster GN=Gdi PE=1 SV=1;tr|Q24349|Q24349_DROME Rab GDP dissociation inhibitor OS=Drosophila melanogaster GN=Gdi PE=2 SV=1	2	1	1	49.902	443	3.1834	4.1	0	0	2407500	0	0
M9PDQ2;B7Z120;Q8IRT7;Q1RL19;M9PIZ6;Q9W4Q4;Q29R23;Q8IRT8;B7Z126;D3DMJ2;Q058T2;A4IJ82	tr|M9PDQ2|M9PDQ2_DROME Tousled-like kinase, isoform L OS=Drosophila melanogaster GN=Tlk PE=1 SV=1;tr|B7Z120|B7Z120_DROME Tousled-like kinase, isoform I OS=Drosophila melanogaster GN=Tlk PE=1 SV=1;tr|Q8IRT7|Q8IRT7_DROME Tousled-like kinase, isoform C OS=Dro	12	6	6	109.95	1011	44.254	0.8	4.7	9.2	2396000	31660000	101320000
Q9VKX2;Q8MQS7	tr|Q9VKX2|Q9VKX2_DROME Malate dehydrogenase OS=Drosophila melanogaster GN=Mdh1 PE=1 SV=2;tr|Q8MQS7|Q8MQS7_DROME Malate dehydrogenase OS=Drosophila melanogaster GN=Mdh1 PE=2 SV=1	2	2	2	36.058	337	3.4896	6.8	3.6	6.8	2388500	3214800	12008000
Q7KTZ2;O18683	tr|Q7KTZ2|Q7KTZ2_DROME Pi3K21B, isoform B OS=Drosophila melanogaster GN=Pi3K21B PE=1 SV=1;tr|O18683|O18683_DROME LD42724p OS=Drosophila melanogaster GN=Pi3K21B PE=2 SV=3	2	2	2	56.285	496	4.4254	2.6	5	2.6	2378600	7793400	9057800
A0A0B4LEY9;C5WLT8;Q9V411;A0AVV0	tr|A0A0B4LEY9|A0A0B4LEY9_DROME Nucleolar GTP-binding protein 1 OS=Drosophila melanogaster GN=Non1 PE=1 SV=1;tr|C5WLT8|C5WLT8_DROME Nucleolar GTP-binding protein 1 OS=Drosophila melanogaster GN=CG8801-RA PE=2 SV=1;sp|Q9V411|NOG1_DROME Nucleolar GTP-binding	4	6	6	75.351	652	19.266	1.5	1.8	11.8	2370800	2269800	100840000
Q9VHK5;Q7KSU3	tr|Q9VHK5|Q9VHK5_DROME CG8379, isoform A OS=Drosophila melanogaster GN=anon-WO0118547.250 PE=2 SV=2;tr|Q7KSU3|Q7KSU3_DROME CG8379, isoform B OS=Drosophila melanogaster GN=anon-WO0118547.250 PE=2 SV=1	2	2	2	80.926	706	5.8224	4	4	1.4	2354300	13210000	12153000
A0A0B4K6U2;E1JIJ7;Q8INH9;A0A0B4K6G6;Q9VG05;Q8MQW9	tr|A0A0B4K6U2|A0A0B4K6U2_DROME CG7518, isoform G OS=Drosophila melanogaster GN=Dmel\CG7518 PE=1 SV=1;tr|E1JIJ7|E1JIJ7_DROME CG7518, isoform I OS=Drosophila melanogaster GN=Dmel\CG7518 PE=1 SV=2;tr|Q8INH9|Q8INH9_DROME CG7518, isoform J OS=Drosophila melanog	6	4	4	252.51	2306	28.38	1.2	1.2	3	2354000	4929000	49038000
P17336	sp|P17336|CATA_DROME Catalase OS=Drosophila melanogaster GN=Cat PE=1 SV=2	1	2	2	57.149	506	3.6759	3	5.7	3	2349200	7331600	20336000
Q9GQS3;Q9GNH8;Q9W330	tr|Q9GQS3|Q9GQS3_DROME Phosphotransferase (Fragment) OS=Drosophila melanogaster GN=Hex-A PE=2 SV=1;tr|Q9GNH8|Q9GNH8_DROME Phosphotransferase OS=Drosophila melanogaster GN=Hex-A PE=1 SV=1;tr|Q9W330|Q9W330_DROME Phosphotransferase OS=Drosophila melanogaster	3	1	1	28.598	254	3.814	4.7	0	4.7	2338200	0	6261800
Q9VGH0	tr|Q9VGH0|Q9VGH0_DROME CG6962 OS=Drosophila melanogaster GN=Dmel\CG6962 PE=1 SV=1	1	2	2	86.946	767	6.3415	1.6	3.4	3.4	2323600	14394000	13223000
O61613	sp|O61613|NMT_DROME Glycylpeptide N-tetradecanoyltransferase OS=Drosophila melanogaster GN=Nmt PE=2 SV=2	1	2	2	53.832	472	3.5802	4.2	4.2	4.2	2323100	12395000	12326000
A0A0B4LGQ1;Q00637	tr|A0A0B4LGQ1|A0A0B4LGQ1_DROME Superoxide dismutase OS=Drosophila melanogaster GN=Sod2 PE=3 SV=1;sp|Q00637|SODM_DROME Superoxide dismutase [Mn], mitochondrial OS=Drosophila melanogaster GN=Sod2 PE=2 SV=3	2	1	1	24.659	217	2.5671	6.5	6.5	6.5	2321400	5561700	12473000
Q7JXE1	tr|Q7JXE1|Q7JXE1_DROME CG8297 OS=Drosophila melanogaster GN=bug PE=2 SV=1	1	1	1	33.575	295	3.0066	4.7	4.7	4.7	2316100	6294900	14129000
Q9VWL4	tr|Q9VWL4|Q9VWL4_DROME CG7556, isoform A OS=Drosophila melanogaster GN=Dmel\CG7556 PE=1 SV=1	1	3	3	59.989	522	16.461	3.4	13.4	6.1	2314400	31997000	15166000
Q9VW22;B7FNQ9;Q95TM6	tr|Q9VW22|Q9VW22_DROME FI18195p1 OS=Drosophila melanogaster GN=l(3)76BDm PE=1 SV=2;tr|B7FNQ9|B7FNQ9_DROME RE63961p OS=Drosophila melanogaster GN=CG8793-RA PE=2 SV=1;tr|Q95TM6|Q95TM6_DROME LD38816p OS=Drosophila melanogaster GN=l(3)76BDm PE=2 SV=1	3	2	2	147.68	1319	4.2464	2.4	0.8	2.4	2301800	2435800	17026000
T2FGD8;A1Z9A8	tr|T2FGD8|T2FGD8_DROME FI21483p1 OS=Drosophila melanogaster GN=CG4679-RA PE=2 SV=1;sp|A1Z9A8|PTCD3_DROME Protein PTCD3 homolog, mitochondrial OS=Drosophila melanogaster GN=CG4679 PE=2 SV=1	2	5	5	74.206	652	20.624	3.2	4.8	13.7	2299700	9422900	55671000
A0A126GUU0;T1UM80;Q9V3G6	tr|A0A126GUU0|A0A126GUU0_DROME CCR4-NOT transcription complex subunit 10, isoform B OS=Drosophila melanogaster GN=Not10 PE=4 SV=1;tr|T1UM80|T1UM80_DROME LD30516p1 (Fragment) OS=Drosophila melanogaster GN=CG18616-RA PE=2 SV=1;sp|Q9V3G6|CNO10_DROME CCR4-NOT	3	2	2	69.692	635	3.2764	3.5	3.5	2.2	2294500	11990000	0
M9PBM1;Q94535	tr|M9PBM1|M9PBM1_DROME U2 small nuclear riboprotein auxiliary factor 38, isoform B OS=Drosophila melanogaster GN=U2af38 PE=4 SV=1;sp|Q94535|U2AF1_DROME Splicing factor U2af 38 kDa subunit OS=Drosophila melanogaster GN=U2af38 PE=1 SV=2	2	2	2	29.877	264	6.1993	4.5	5.3	5.3	2292800	13720000	24953000
Q9VHW4;Q960B1	tr|Q9VHW4|Q9VHW4_DROME FI21225p1 OS=Drosophila melanogaster GN=unc-45 PE=1 SV=1;tr|Q960B1|Q960B1_DROME SD10334p OS=Drosophila melanogaster GN=unc-45 PE=1 SV=1	2	4	4	105.05	947	11.091	3.3	1.7	6.5	2267500	2585400	19618000
Q0E8G6;Q9VSY2	tr|Q0E8G6|Q0E8G6_DROME CG3689, isoform C OS=Drosophila melanogaster GN=Dmel\CG3689 PE=1 SV=1;tr|Q9VSY2|Q9VSY2_DROME CG3689, isoform B OS=Drosophila melanogaster GN=Dmel\CG3689 PE=1 SV=2	2	4	4	26.961	237	14	7.6	11.8	24.1	2256700	11498000	113610000
Q7K0B6	tr|Q7K0B6|Q7K0B6_DROME Glutathione S transferase T1 OS=Drosophila melanogaster GN=GstT1 PE=1 SV=1	1	1	1	26.571	228	2.6709	4.8	0	4.8	2251500	0	8664300
Q9VHJ4	tr|Q9VHJ4|Q9VHJ4_DROME GH04846p OS=Drosophila melanogaster GN=RagA-B PE=1 SV=1	1	2	2	35.616	311	5.8671	6.4	10.6	6.4	2247100	19657000	19389000
Q0KHQ1;C4IXV9	tr|Q0KHQ1|Q0KHQ1_DROME GEO13361p1 OS=Drosophila melanogaster GN=SLIRP1 PE=1 SV=1;tr|C4IXV9|C4IXV9_DROME GM17572p (Fragment) OS=Drosophila melanogaster GN=CG33714-RA PE=2 SV=1	2	1	1	10.031	90	3.984	17.8	17.8	17.8	2244800	7619000	9723300
A0A0B4K6W2;A0A0B4K7S0;P55824;D5A7R4	tr|A0A0B4K6W2|A0A0B4K6W2_DROME Fat facets, isoform E OS=Drosophila melanogaster GN=faf PE=3 SV=1;tr|A0A0B4K7S0|A0A0B4K7S0_DROME Fat facets, isoform D OS=Drosophila melanogaster GN=faf PE=3 SV=1;sp|P55824|FAF_DROME Probable ubiquitin carboxyl-terminal hydro	4	2	2	309.93	2761	3.4459	0.5	0	0.4	2239400	0	0
A1ZBM2;Q7K1S6	tr|A1ZBM2|A1ZBM2_DROME Tubulin-binding cofactor B OS=Drosophila melanogaster GN=TBCB PE=1 SV=1;tr|Q7K1S6|Q7K1S6_DROME LD45244p (Fragment) OS=Drosophila melanogaster GN=TBCB PE=2 SV=1	2	1	1	26.974	244	2.2927	6.1	6.1	0	2237000	5436200	0
A8DYB0;Q95TG7;A2VEG7	tr|A8DYB0|A8DYB0_DROME Midasin OS=Drosophila melanogaster GN=CG13185 PE=1 SV=2;tr|Q95TG7|Q95TG7_DROME SD07158p OS=Drosophila melanogaster GN=CG13185 PE=2 SV=1;tr|A2VEG7|A2VEG7_DROME IP16981p (Fragment) OS=Drosophila melanogaster PE=2 SV=1	3	4	4	631.32	5526	8.3063	0.4	0.5	0.9	2214000	2138800	11793000
Q8T9C4	tr|Q8T9C4|Q8T9C4_DROME SD07683p OS=Drosophila melanogaster PE=2 SV=1	1	1	1	57.712	512	1.999	2	0	2	2204600	0	10026000
A0A1B2AJY7;Q9VLV5	tr|A0A1B2AJY7|A0A1B2AJY7_DROME GEO07186p1 (Fragment) OS=Drosophila melanogaster PE=2 SV=1;sp|Q9VLV5|RUXE_DROME Probable small nuclear ribonucleoprotein E OS=Drosophila melanogaster GN=SmE PE=1 SV=1	2	2	2	11.096	94	3.8703	16	27.7	0	2189500	12801000	0
M9PGI3;Q27884	tr|M9PGI3|M9PGI3_DROME Serine/threonine-protein phosphatase OS=Drosophila melanogaster GN=PpV PE=3 SV=1;sp|Q27884|PPP6_DROME Serine/threonine-protein phosphatase 6 catalytic subunit OS=Drosophila melanogaster GN=PpV PE=2 SV=1	2	1	1	34.759	303	2.1018	4	4	4	2177300	2275400	8182800
A1Z8W9;A0A0B4K7N0;A1Z8W8;Q8T4A1	tr|A1Z8W9|A1Z8W9_DROME Gartenzwerg, isoform A OS=Drosophila melanogaster GN=garz PE=1 SV=1;tr|A0A0B4K7N0|A0A0B4K7N0_DROME Gartenzwerg, isoform C OS=Drosophila melanogaster GN=garz PE=1 SV=1;tr|A1Z8W8|A1Z8W8_DROME Gartenzwerg, isoform B OS=Drosophila melano	4	6	6	194.87	1740	22.366	3	3.6	4.1	2170900	17021000	33210000
Q7K0D3;C0MJK5;A0AP75;A0AP71;A0AP73	tr|Q7K0D3|Q7K0D3_DROME CG12909 protein OS=Drosophila melanogaster GN=CG12909 PE=1 SV=1;tr|C0MJK5|C0MJK5_DROME CG12909-PA OS=Drosophila melanogaster GN=CG12909 PE=4 SV=1;tr|A0AP75|A0AP75_DROME CG12909 protein OS=Drosophila melanogaster GN=CG12909 PE=4 SV=1;	5	4	4	32.108	281	13.767	4.6	15.3	0	2167100	17591000	0
X2JEB4;O96651	tr|X2JEB4|X2JEB4_DROME DNA topoisomerase OS=Drosophila melanogaster GN=Top3beta PE=1 SV=1;sp|O96651|TOP3B_DROME DNA topoisomerase 3-beta OS=Drosophila melanogaster GN=Top3beta PE=2 SV=2	2	1	1	96.972	875	-2	0.9	0.9	0	2166300	12792000	0
M9NFL1;M9ND37;L7X6D0;Q9VZP5;Q9NJH7;M9WSU4;R4TCQ6;Q494K9	tr|M9NFL1|M9NFL1_DROME eIF5B, isoform D OS=Drosophila melanogaster GN=eIF5B PE=1 SV=1;tr|M9ND37|M9ND37_DROME eIF5B, isoform E OS=Drosophila melanogaster GN=eIF5B PE=1 SV=1;tr|L7X6D0|L7X6D0_DROME LD42524p1 (Fragment) OS=Drosophila melanogaster GN=eIF5B-RB P	8	4	4	121.12	1090	27.613	0.8	8	3.1	2119500	54926000	22234000
Q7JXZ2;O97121	tr|Q7JXZ2|Q7JXZ2_DROME Eip55E, isoform A OS=Drosophila melanogaster GN=Eip55E PE=1 SV=1;tr|O97121|O97121_DROME Ecdysteroid-inducible polypeptide EIP40 OS=Drosophila melanogaster GN=Eip55E PE=3 SV=1	2	3	3	42.988	393	8.093	2.5	6.1	8.7	2117300	6951500	16528000
Q86NM8;C4IY07;Q24276	tr|Q86NM8|Q86NM8_DROME SD25413p OS=Drosophila melanogaster GN=Cdc37 PE=2 SV=1;tr|C4IY07|C4IY07_DROME FI07667p OS=Drosophila melanogaster GN=Cdc37-RA PE=2 SV=1;sp|Q24276|CDC37_DROME Hsp90 co-chaperone Cdc37 OS=Drosophila melanogaster GN=Cdc37 PE=1 SV=1	3	3	3	45.148	389	9.9925	2.8	8	12.6	2114400	16461000	39887000
Q9VF78	sp|Q9VF78|COG2_DROME Conserved oligomeric Golgi complex subunit 2 OS=Drosophila melanogaster GN=ldlCp PE=2 SV=1	1	2	2	81.135	710	10.401	3.4	7.3	7.3	2113500	10499000	22165000
Q8SWU2;Q9VW13	tr|Q8SWU2|Q8SWU2_DROME RE26764p OS=Drosophila melanogaster GN=CG9330 PE=2 SV=1;tr|Q9VW13|Q9VW13_DROME CG9330 OS=Drosophila melanogaster GN=Dmel\CG9330 PE=1 SV=1	2	1	1	71.54	638	2.6804	1.7	1.7	1.7	2110500	5599000	8337500
Q9VZL3;B6IDR5;Q95R45	tr|Q9VZL3|Q9VZL3_DROME Sc2 OS=Drosophila melanogaster GN=Sc2 PE=1 SV=1;tr|B6IDR5|B6IDR5_DROME FI06688p (Fragment) OS=Drosophila melanogaster GN=Sc2-RA PE=2 SV=1;tr|Q95R45|Q95R45_DROME SD09294p (Fragment) OS=Drosophila melanogaster GN=Sc2 PE=2 SV=2	3	3	3	34.185	302	7.4885	3	10.6	6	2102800	21469000	17006000
Q95T98	tr|Q95T98|Q95T98_DROME Elongation of very long chain fatty acids protein OS=Drosophila melanogaster GN=CG9798 PE=2 SV=1	1	1	1	41.165	354	2.238	2.5	2.5	2.5	2061600	4856000	10356000
M9PIA6;E1JI46;Q59E34;O97159;L7S4V9;M9WKL1;B1PGL6;B1PGM0;B1PGN0;B1PGM9;B1PGM7;B1PGM4;B1PGM1;B1PGL5;B1PGK6;B1PGK4	tr|M9PIA6|M9PIA6_DROME Mi-2, isoform D OS=Drosophila melanogaster GN=Mi-2 PE=1 SV=1;tr|E1JI46|E1JI46_DROME Mi-2, isoform C OS=Drosophila melanogaster GN=Mi-2 PE=1 SV=1;tr|Q59E34|Q59E34_DROME Mi-2, isoform B OS=Drosophila melanogaster GN=Mi-2 PE=1 SV=1;sp|O	16	4	4	223.13	1973	20.929	0.6	2.5	2.5	2060300	30879000	44671000
I1WYH6;Q9VCX4	tr|I1WYH6|I1WYH6_DROME RH61333p1 (Fragment) OS=Drosophila melanogaster GN=CG31159-RA PE=2 SV=1;sp|Q9VCX4|RRF2M_DROME Ribosome-releasing factor 2, mitochondrial OS=Drosophila melanogaster GN=EF-G2 PE=2 SV=3	2	1	1	77.429	703	2.0022	1.6	1.6	1.6	2056700	8164500	15706000
Q9VPW1	sp|Q9VPW1|ASTE_DROME Protein asteroid OS=Drosophila melanogaster GN=ast PE=2 SV=1	1	3	3	98.375	854	9.6593	1.6	1.6	4.7	2056100	2840000	34419000
C0PV70;S5WMX5;Q9W3C7	tr|C0PV70|C0PV70_DROME MIP09280p OS=Drosophila melanogaster GN=Ppt1-RA PE=2 SV=1;tr|S5WMX5|S5WMX5_DROME FI22366p1 OS=Drosophila melanogaster GN=Ppt1 PE=1 SV=1;sp|Q9W3C7|PPT1_DROME Palmitoyl-protein thioesterase 1 OS=Drosophila melanogaster GN=Ppt1 PE=2 SV=	3	3	3	30.309	266	7.1504	8.6	13.5	5.3	2049000	24159000	13349000
Q9VHG1	tr|Q9VHG1|Q9VHG1_DROME RE66051p OS=Drosophila melanogaster GN=Vps16A PE=1 SV=1	1	1	1	95.971	833	-2	1.4	1.4	0	2013700	7611400	0
Q9W1C5	sp|Q9W1C5|INT1_DROME Integrator complex subunit 1 OS=Drosophila melanogaster GN=IntS1 PE=1 SV=2	1	3	3	235.1	2053	3.9903	0.5	1.3	0.6	2012300	5583800	2861700
Q9VK59	tr|Q9VK59|Q9VK59_DROME CG5787, isoform A OS=Drosophila melanogaster GN=Dmel\CG5787 PE=1 SV=2	1	7	7	100.26	950	20.776	2.4	10	0.8	1992600	61038000	4816100
Q7JXU4	tr|Q7JXU4|Q7JXU4_DROME Nucleolar GTP-binding protein 2 OS=Drosophila melanogaster GN=Ns2 PE=1 SV=1	1	3	3	76.607	674	8.0856	2.2	2.2	4.7	1988400	3383900	25533000
Q9VFP0	tr|Q9VFP0|Q9VFP0_DROME CG3061 OS=Drosophila melanogaster GN=Dmel\CG3061 PE=1 SV=1	1	1	1	41.701	370	2.4184	3.5	3.5	3.5	1978100	6183800	16855000
M9PFB5;Q94899	tr|M9PFB5|M9PFB5_DROME Alien, isoform D OS=Drosophila melanogaster GN=alien PE=4 SV=1;sp|Q94899|CSN2_DROME COP9 signalosome complex subunit 2 OS=Drosophila melanogaster GN=alien PE=1 SV=2	2	2	2	51.526	444	3.5661	2.7	2.7	5	1975100	15528000	19343000
A0A0B4LHK4;A0A0B4KHZ8;A0A0B4KHR8;A0A0H4XWY3;A0A0B4K725;Q9VCA8	tr|A0A0B4LHK4|A0A0B4LHK4_DROME Multiple ankyrin repeats single KH domain, isoform F OS=Drosophila melanogaster GN=mask PE=4 SV=1;tr|A0A0B4KHZ8|A0A0B4KHZ8_DROME Multiple ankyrin repeats single KH domain, isoform D OS=Drosophila melanogaster GN=mask PE=4 SV=	6	8	8	386.81	3623	36.505	0.4	0	3.5	1970200	0	55372000
M9PF42;Q9VLT9;Q86M30;M9NEC0;D3DML3	tr|M9PF42|M9PF42_DROME Connector of kinase to AP-1, isoform G OS=Drosophila melanogaster GN=Cka PE=1 SV=1;tr|Q9VLT9|Q9VLT9_DROME Connector of kinase to AP-1, isoform A OS=Drosophila melanogaster GN=Cka PE=1 SV=2;tr|Q86M30|Q86M30_DROME WD-40 family member p	5	1	1	77.105	722	2.8919	2.5	0	2.5	1961300	0	10569000
Q6SBV5	tr|Q6SBV5|Q6SBV5_DROME Epidermal growth factor receptor (Fragment) OS=Drosophila melanogaster GN=Egfr PE=4 SV=1	1	1	1	5.5435	51	-2	23.5	0	0	1943900	0	0
C8VV60;M9NE87;Q9VTX8;Q86D35	tr|C8VV60|C8VV60_DROME FI03659p OS=Drosophila melanogaster GN=CG10616-RA PE=1 SV=1;tr|M9NE87|M9NE87_DROME Uncharacterized protein, isoform B OS=Drosophila melanogaster GN=Dmel\CG10616 PE=1 SV=1;sp|Q9VTX8|ODR4_DROME Protein odr-4 homolog OS=Drosophila melan	4	7	7	54.586	492	38.68	2.8	8.3	16.5	1936300	16535000	68184000
M9NH51;M9NDZ4;M9NF89;Q24562	tr|M9NH51|M9NH51_DROME U2 snRNP auxiliary factor large subunit OS=Drosophila melanogaster GN=U2af50 PE=3 SV=1;tr|M9NDZ4|M9NDZ4_DROME U2 snRNP auxiliary factor large subunit OS=Drosophila melanogaster GN=U2af50 PE=3 SV=1;tr|M9NF89|M9NF89_DROME U2 snRNP auxi	4	2	2	39.456	360	3.0734	4.4	3.9	8.3	1933700	7373400	29549000
Q9VVW7;Q95S24	tr|Q9VVW7|Q9VVW7_DROME Uncharacterized protein OS=Drosophila melanogaster GN=CNPYb PE=1 SV=2;tr|Q95S24|Q95S24_DROME GM14561p OS=Drosophila melanogaster GN=CNPYb PE=2 SV=1	2	1	1	25.632	221	2.4365	5	0	0	1914700	0	0
Q9VLN1	sp|Q9VLN1|WDR82_DROME WD repeat-containing protein 82 OS=Drosophila melanogaster GN=Wdr82 PE=1 SV=1	1	1	1	35.355	317	2.8344	7.3	7.3	7.3	1903900	2692900	25908000
Q9V3D6	sp|Q9V3D6|CPSF2_DROME Probable cleavage and polyadenylation specificity factor subunit 2 OS=Drosophila melanogaster GN=Cpsf100 PE=1 SV=1	1	2	2	85.417	756	3.3236	2	1.1	2	1899400	0	14611000
Q9V9Z9	sp|Q9V9Z9|EBP2_DROME Probable rRNA-processing protein EBP2 homolog OS=Drosophila melanogaster GN=CG1542 PE=2 SV=1	1	2	2	35.077	307	4.7966	2.9	6.8	6.8	1899200	26135000	24561000
Q7KMJ6;Q8T0B2	tr|Q7KMJ6|Q7KMJ6_DROME BcDNA.GH11110 OS=Drosophila melanogaster GN=nito PE=1 SV=1;tr|Q8T0B2|Q8T0B2_DROME LD14125p OS=Drosophila melanogaster GN=nito PE=2 SV=1	2	8	8	89.052	793	26.596	1.3	3	10.6	1898200	9915100	204420000
Q9VD00;Q8MRU8	tr|Q9VD00|Q9VD00_DROME CG5377 OS=Drosophila melanogaster GN=Dmel\CG5377 PE=1 SV=1;tr|Q8MRU8|Q8MRU8_DROME SD22712p OS=Drosophila melanogaster GN=CG5377 PE=2 SV=1	2	2	2	31.703	278	3.0164	2.9	5.4	5.4	1877500	6253000	14401000
Q540V5;P42207	tr|Q540V5|Q540V5_DROME RE30523p OS=Drosophila melanogaster GN=Sep1 PE=2 SV=1;sp|P42207|SEPT1_DROME Septin-1 OS=Drosophila melanogaster GN=Sep1 PE=1 SV=1	2	2	2	41.131	361	8.2772	4.4	6.1	10.5	1868500	11692000	36629000
Q8MRI4	tr|Q8MRI4|Q8MRI4_DROME CG1578, isoform A OS=Drosophila melanogaster GN=Dmel\CG1578 PE=1 SV=1	1	1	1	97.592	901	4.2061	2.2	0	2.2	1864700	0	8156900
Q95TK6;A0A0B4KI43;Q9VB55;Q6AWL3;A0A0B4KHZ0;A8JRE3;D6W4L7;A0A0B4K7W6;Q9N9Z6	tr|Q95TK6|Q95TK6_DROME LD44304p OS=Drosophila melanogaster GN=woc PE=2 SV=1;tr|A0A0B4KI43|A0A0B4KI43_DROME Without children, isoform D OS=Drosophila melanogaster GN=woc PE=1 SV=1;tr|Q9VB55|Q9VB55_DROME Without children, isoform A OS=Drosophila melanogaster	9	3	3	117.76	1043	7.7628	1.9	1.2	1.3	1857000	5808500	7041100
A0A0B4KH36;A0A0B4KFQ0;A0A0B4KGR9;Q9VH01;A0A0B4KG50;Q8MS47	tr|A0A0B4KH36|A0A0B4KH36_DROME BIR repeat containing ubiquitin-conjugating enzyme, isoform C OS=Drosophila melanogaster GN=Bruce PE=1 SV=1;tr|A0A0B4KFQ0|A0A0B4KFQ0_DROME BIR repeat containing ubiquitin-conjugating enzyme, isoform E OS=Drosophila melanogast	6	4	4	536.53	4852	12.583	0.2	0	1.1	1856600	0	23017000
P05205	sp|P05205|HP1_DROME Heterochromatin protein 1 OS=Drosophila melanogaster GN=Su(var)205 PE=1 SV=2	1	3	3	23.185	206	39.906	9.2	20.4	13.1	1851200	33452000	17868000
Q9W0K9;Q8IGC7	tr|Q9W0K9|Q9W0K9_DROME CG9205, isoform A OS=Drosophila melanogaster GN=Dmel\CG9205 PE=1 SV=1;tr|Q8IGC7|Q8IGC7_DROME RH55218p (Fragment) OS=Drosophila melanogaster GN=CG9205 PE=2 SV=1	2	2	2	24.322	224	3.1419	8	0	5.8	1849200	0	0
A0A0B4KGK3;Q95RA8	tr|A0A0B4KGK3|A0A0B4KGK3_DROME Mob as tumor suppressor, isoform B OS=Drosophila melanogaster GN=mats PE=4 SV=1;sp|Q95RA8|MOB1_DROME MOB kinase activator-like 1 OS=Drosophila melanogaster GN=mats PE=1 SV=1	2	1	1	25.229	219	2.1573	5	0	0	1845800	0	0
Q9V3V3;B9EQW0	tr|Q9V3V3|Q9V3V3_DROME Pez, isoform A OS=Drosophila melanogaster GN=Pez PE=2 SV=1	2	3	3	139.65	1252	12.79	1	0	3.4	1835900	0	21186000
O96936;E1JH64;B7YZG2;A1Z9I8	tr|O96936|O96936_DROME Kakapo (Fragment) OS=Drosophila melanogaster GN=shot PE=2 SV=1;tr|E1JH64|E1JH64_DROME Short stop, isoform Q OS=Drosophila melanogaster GN=shot PE=1 SV=1;tr|B7YZG2|B7YZG2_DROME Short stop, isoform K OS=Drosophila melanogaster GN=shot	4	1	1	472.27	4151	-2	0.3	0	0	1832600	0	0
T2FFB7;Q9VLM8;Q8T9G8;K7ZI11	tr|T2FFB7|T2FFB7_DROME FI21402p1 OS=Drosophila melanogaster GN=Aats-ala-RB PE=2 SV=1;sp|Q9VLM8|SYAC_DROME Alanine--tRNA ligase, cytoplasmic OS=Drosophila melanogaster GN=Aats-ala PE=2 SV=1;tr|Q8T9G8|Q8T9G8_DROME SD01519p OS=Drosophila melanogaster GN=AlaRS	4	6	6	107.74	966	12.201	2.7	4.3	5.5	1832300	26119000	39340000
A1Z942;A1Z943;Q0E9A1;Q8IHB6;E1JH47;A4IJ68;Q7JQK6;A0A0B4LGA3;Q961I1;A0A0B4LF95;A1Z944;Q1RL13	tr|A1Z942|A1Z942_DROME Glutaminase, isoform E OS=Drosophila melanogaster GN=GLS PE=1 SV=1;tr|A1Z943|A1Z943_DROME Glutaminase, isoform C OS=Drosophila melanogaster GN=GLS PE=1 SV=1;tr|Q0E9A1|Q0E9A1_DROME Glutaminase, isoform F OS=Drosophila melanogaster GN=	12	2	2	72.049	648	5.0607	2	5.1	5.1	1829900	6193900	10978000
Q9VHC5	tr|Q9VHC5|Q9VHC5_DROME JmjC domain-containing histone demethylase 2, isoform A OS=Drosophila melanogaster GN=JHDM2 PE=2 SV=1	1	2	2	97.193	854	3.867	2.7	1.8	2.7	1811400	3422400	10386000
A0A0B4K891;Q7K581	tr|A0A0B4K891|A0A0B4K891_DROME CG8963, isoform E OS=Drosophila melanogaster GN=CG8963 PE=1 SV=1;tr|Q7K581|Q7K581_DROME CG8963, isoform A OS=Drosophila melanogaster GN=CG8963 PE=1 SV=1	2	4	4	58.357	520	8.253	5	5	9.8	1792200	8889300	63049000
Q9VPF9	tr|Q9VPF9|Q9VPF9_DROME CG5274, isoform A OS=Drosophila melanogaster GN=Dmel\CG5274 PE=2 SV=1	1	1	1	41.316	373	3.798	5.4	5.4	5.4	1789800	2984800	2883400
Q9VZ04;Q95R68;A9UNC0	tr|Q9VZ04|Q9VZ04_DROME Glucosidase 1, isoform B OS=Drosophila melanogaster GN=GCS1 PE=1 SV=4;tr|Q95R68|Q95R68_DROME SD04273p OS=Drosophila melanogaster GN=GCS1 PE=2 SV=1;tr|A9UNC0|A9UNC0_DROME RE03215p OS=Drosophila melanogaster GN=CG1597 PE=2 SV=1	3	1	1	96.148	849	2.547	1.8	0	1.8	1785700	0	11388000
Q9VI70	tr|Q9VI70|Q9VI70_DROME CG2656 OS=Drosophila melanogaster GN=NEST:bs33f03 PE=1 SV=2	1	1	1	31.862	283	8.6348	5.7	0	5.7	1780600	0	7769500
Q7JXC4;A0APE6;A0APE4	tr|Q7JXC4|Q7JXC4_DROME CG6459 protein OS=Drosophila melanogaster GN=P32 PE=1 SV=1;tr|A0APE6|A0APE6_DROME CG6459 protein OS=Drosophila melanogaster GN=CG6459 PE=4 SV=1;tr|A0APE4|A0APE4_DROME CG6459 protein OS=Drosophila melanogaster GN=CG6459 PE=4 SV=1	3	1	1	28.975	263	5.8173	5.3	5.3	5.3	1776700	2057800	6187800
Q9U9Q7;Q7KM15	tr|Q9U9Q7|Q9U9Q7_DROME Transcription factor BTF3 OS=Drosophila melanogaster GN=bic PE=2 SV=1;tr|Q7KM15|Q7KM15_DROME Transcription factor BTF3 OS=Drosophila melanogaster GN=bic PE=1 SV=1	2	1	1	17.793	169	2.7221	9.5	9.5	9.5	1771100	9659300	9486600
D2NUI9;Q9VBX1;Q3ZAL4	tr|D2NUI9|D2NUI9_DROME MIP15468p OS=Drosophila melanogaster GN=Clbn-RA PE=2 SV=1;sp|Q9VBX1|NEMF_DROME Nuclear export mediator factor NEMF homolog OS=Drosophila melanogaster GN=Clbn PE=1 SV=2;tr|Q3ZAL4|Q3ZAL4_DROME IP12823p (Fragment) OS=Drosophila melanoga	3	4	4	106.75	939	8.1555	1.1	4.8	0	1767500	33041000	0
Q9VC06	tr|Q9VC06|Q9VC06_DROME LD37516p OS=Drosophila melanogaster GN=anon-EST:Posey100 PE=1 SV=1	1	4	4	81.398	730	10.494	1.5	7.1	3.2	1765000	24971000	26680000
Q9VB05	tr|Q9VB05|Q9VB05_DROME ALG-2 interacting protein X OS=Drosophila melanogaster GN=ALiX PE=1 SV=1	1	1	1	92.538	836	2.2925	1.6	1.6	1.6	1758600	2413700	8891800
Q8SZQ6;Q9VDE8	tr|Q8SZQ6|Q8SZQ6_DROME RE68655p OS=Drosophila melanogaster GN=CG7044 PE=2 SV=1;tr|Q9VDE8|Q9VDE8_DROME CG7044 OS=Drosophila melanogaster GN=Dmel\CG7044 PE=1 SV=1	2	1	1	77.764	676	2.0337	1.2	1.2	1.2	1755700	2868000	3733900
Q9VC52;Q9U8D0	tr|Q9VC52|Q9VC52_DROME Protoporphyrinogen oxidase OS=Drosophila melanogaster GN=Ppox PE=1 SV=1;tr|Q9U8D0|Q9U8D0_DROME Protoporphyrinogen oxidase OS=Drosophila melanogaster GN=Ppox PE=2 SV=1	2	3	3	53.201	475	61.017	6.9	6.9	10.1	1738400	11545000	38281000
O01382;O02002	sp|O01382|DRICE_DROME Caspase OS=Drosophila melanogaster GN=Drice PE=1 SV=2	2	4	4	37.363	339	8.7182	10.9	0	4.1	1725600	0	8474300
Q9V475;C3KGQ1;Q8IP45	tr|Q9V475|Q9V475_DROME Cullin 3, isoform C OS=Drosophila melanogaster GN=Cul3 PE=1 SV=1;tr|C3KGQ1|C3KGQ1_DROME GH13892p OS=Drosophila melanogaster GN=gft-RB PE=2 SV=1;tr|Q8IP45|Q8IP45_DROME Cullin 3, isoform F OS=Drosophila melanogaster GN=Cul3 PE=1 SV=2	3	4	4	89.553	773	15.721	4	1.9	7.5	1724300	14737000	46076000
Q95SH7	tr|Q95SH7|Q95SH7_DROME GH26007p OS=Drosophila melanogaster GN=Dmel\CG14969 PE=1 SV=1	1	2	2	34.892	315	15.65	3.5	5.4	5.4	1717800	7297800	10789000
H1ZYC1;H1ZYB7;H1ZYB5;M9PFS0;Q9VK45	tr|H1ZYC1|H1ZYC1_DROME Target for rapamycin OS=Drosophila melanogaster GN=Tor PE=3 SV=1;tr|H1ZYB7|H1ZYB7_DROME Target for rapamycin OS=Drosophila melanogaster GN=Tor PE=3 SV=1;tr|H1ZYB5|H1ZYB5_DROME Target for rapamycin OS=Drosophila melanogaster GN=Tor PE	5	1	1	281.06	2470	3.3011	0.6	0	0.6	1702100	0	21175000
Q7KUT2;Q960X9	sp|Q7KUT2|LONM_DROME Lon protease homolog, mitochondrial OS=Drosophila melanogaster GN=Lon PE=1 SV=1;tr|Q960X9|Q960X9_DROME Lon protease homolog, mitochondrial OS=Drosophila melanogaster GN=Lon PE=2 SV=1	2	4	4	115.03	1024	5.9874	1.1	4.2	4.4	1682200	5127300	23456000
Q6IDG3;S5MHR4;Q9XTM1	tr|Q6IDG3|Q6IDG3_DROME RE68722p OS=Drosophila melanogaster PE=2 SV=1;tr|S5MHR4|S5MHR4_DROME FI22538p1 OS=Drosophila melanogaster GN=sec10-RA PE=2 SV=1;sp|Q9XTM1|EXOC5_DROME Exocyst complex component 5 OS=Drosophila melanogaster GN=Sec10 PE=2 SV=1	3	3	3	77.247	669	4.9137	1.5	1.5	4.8	1678700	2445200	8011800
Q9VQ76;M9PE28;E2QCS8;Q960L4	tr|Q9VQ76|Q9VQ76_DROME LD36155p OS=Drosophila melanogaster GN=tho2 PE=1 SV=2;tr|M9PE28|M9PE28_DROME Tho2, isoform C OS=Drosophila melanogaster GN=tho2 PE=1 SV=1;tr|E2QCS8|E2QCS8_DROME Tho2, isoform B OS=Drosophila melanogaster GN=tho2 PE=1 SV=1	4	9	9	188.51	1641	47.753	2.9	6.2	5.2	1671800	37179000	84928000
P61851	sp|P61851|SODC_DROME Superoxide dismutase [Cu-Zn] OS=Drosophila melanogaster GN=Sod PE=1 SV=2	1	1	1	15.698	153	3.4442	9.8	0	0	1662800	0	0
Q32KC5;Q9VUA5	tr|Q32KC5|Q32KC5_DROME AT29009p OS=Drosophila melanogaster GN=CG9028 PE=2 SV=1;tr|Q9VUA5|Q9VUA5_DROME LD42058p OS=Drosophila melanogaster GN=ssp2 PE=1 SV=1	2	2	2	96.508	891	5.4566	1.1	0	3.1	1652700	0	30362000
Q23983	sp|Q23983|SNAP_DROME Alpha-soluble NSF attachment protein OS=Drosophila melanogaster GN=alphaSnap PE=1 SV=1	1	2	2	33	292	3.1675	3.8	0	8.2	1648700	0	7823900
Q9VY54	tr|Q9VY54|Q9VY54_DROME LD24737p OS=Drosophila melanogaster GN=l(1)G0007 PE=1 SV=2	1	1	1	139.58	1222	3.6719	1	1	1	1639400	6303400	10466000
Q9V414;Q8T080;Q95TL1	tr|Q9V414|Q9V414_DROME LD36341p OS=Drosophila melanogaster GN=Smg5 PE=1 SV=1;tr|Q8T080|Q8T080_DROME LD22235p OS=Drosophila melanogaster GN=Smg5 PE=2 SV=1;tr|Q95TL1|Q95TL1_DROME LD42783p OS=Drosophila melanogaster GN=Smg5 PE=2 SV=1	3	4	4	135.31	1177	6.7716	0.8	0.8	3.4	1629700	3685100	17063000
X2JE34;Q8IR13;Q9VXF8;E8NH88;Q7KUX7;Q29R50;X2JC79	tr|X2JE34|X2JE34_DROME RNA-binding protein 2, isoform E OS=Drosophila melanogaster GN=eIF4H1 PE=1 SV=1;tr|Q8IR13|Q8IR13_DROME RNA-binding protein 2, isoform B OS=Drosophila melanogaster GN=eIF4H1 PE=1 SV=1;tr|Q9VXF8|Q9VXF8_DROME RNA-binding protein 2, isof	7	3	3	34.23	317	10.259	3.5	15.8	15.8	1623700	35344000	100930000
X2JAB9;Q24584;O46037	tr|X2JAB9|X2JAB9_DROME Vinculin, isoform B OS=Drosophila melanogaster GN=Vinc PE=1 SV=1;tr|Q24584|Q24584_DROME Vinculin OS=Drosophila melanogaster GN=Vinc PE=4 SV=1;sp|O46037|VINC_DROME Vinculin OS=Drosophila melanogaster GN=Vinc PE=1 SV=1	3	2	2	106.3	961	8.5298	2.7	0	1.6	1611500	0	0
Q9VP27;M9PIG4	tr|Q9VP27|Q9VP27_DROME Golgi complex-localized glycoprotein 1, isoform A OS=Drosophila melanogaster GN=Glg1 PE=1 SV=2;tr|M9PIG4|M9PIG4_DROME Golgi complex-localized glycoprotein 1, isoform B OS=Drosophila melanogaster GN=Glg1 PE=1 SV=1	2	6	6	125	1103	18.878	1.1	5.2	2.7	1601300	39470000	14604000
A0A0B4LF82;O77025;Q5U0Y0;A0A0B4K765;A0A0B4LF93;O17143;A1Z928;O17142;A1Z927;A0A126GUN9;J7KHF5;J7KEE9;J7KED4;J7KB13;J7K9E8;Q960C3	tr|A0A0B4LF82|A0A0B4LF82_DROME Sin3A, isoform H OS=Drosophila melanogaster GN=Sin3A PE=1 SV=1;tr|O77025|O77025_DROME Transcription factor OS=Drosophila melanogaster GN=Sin3A PE=2 SV=1;tr|Q5U0Y0|Q5U0Y0_DROME LD13852p OS=Drosophila melanogaster GN=Sin3A PE=1	16	4	4	220.36	2060	10.931	0.5	1.3	3.5	1596800	6754000	46258000
D8FT09;Q9W592;Q5BIM0;V5P006;C3KGM3	tr|D8FT09|D8FT09_DROME LD01992p (Fragment) OS=Drosophila melanogaster GN=CG14786-RA PE=2 SV=1;tr|Q9W592|Q9W592_DROME EG:BACN32G11.3 protein OS=Drosophila melanogaster GN=Lrpprc2 PE=1 SV=1;tr|Q5BIM0|Q5BIM0_DROME UT01249p OS=Drosophila melanogaster GN=Lrpprc	5	2	2	85.613	764	3.8433	1.6	1.6	4.1	1595200	4999200	9603500
Q9VFM9	sp|Q9VFM9|TWF_DROME Twinfilin OS=Drosophila melanogaster GN=twf PE=1 SV=1	1	1	1	39.07	343	2.7506	4.7	4.7	0	1591700	2193800	0
A0A0B4KGQ0;Q9VCI7	tr|A0A0B4KGQ0|A0A0B4KGQ0_DROME Ran binding protein 3, isoform B OS=Drosophila melanogaster GN=RanBP3 PE=1 SV=1;tr|Q9VCI7|Q9VCI7_DROME LD02979p OS=Drosophila melanogaster GN=RanBP3 PE=1 SV=1	2	1	1	47.373	448	2.8921	2.7	0	2.7	1582400	0	0
Q9VRG8	tr|Q9VRG8|Q9VRG8_DROME CG1486, isoform A OS=Drosophila melanogaster GN=Dmel\CG1486 PE=1 SV=1	1	2	2	91.521	852	5.2298	1.3	3.1	1.3	1571300	5663300	7382900
Q9VUH8	tr|Q9VUH8|Q9VUH8_DROME RE01471p OS=Drosophila melanogaster GN=Tdrd3 PE=1 SV=1	1	1	1	91.727	836	2.373	1.7	1.7	1.7	1568800	4087900	9088400
Q9VHT2;Q8MSF3	tr|Q9VHT2|Q9VHT2_DROME FI07663p OS=Drosophila melanogaster GN=tex PE=1 SV=1;tr|Q8MSF3|Q8MSF3_DROME GM21396p OS=Drosophila melanogaster GN=tex PE=2 SV=1	2	4	4	36.406	320	13.903	5.3	15	2.8	1556300	51384000	15396000
A1Z6H4;Q7K1T1	tr|A1Z6H4|A1Z6H4_DROME RE52822p OS=Drosophila melanogaster GN=vlc PE=1 SV=1;tr|Q7K1T1|Q7K1T1_DROME LD44824p OS=Drosophila melanogaster GN=vlc PE=1 SV=1	2	1	1	63.597	583	10.099	3.4	0	3.4	1546300	0	28786000
A0A0B4K6Y4;A0A0B4KGS7;A0A0B4K7D1;A0A126GV12;Q86B79	tr|A0A0B4K6Y4|A0A0B4K6Y4_DROME Unkempt, isoform C OS=Drosophila melanogaster GN=unk PE=4 SV=1;tr|A0A0B4KGS7|A0A0B4KGS7_DROME Unkempt, isoform F OS=Drosophila melanogaster GN=unk PE=4 SV=1;tr|A0A0B4K7D1|A0A0B4K7D1_DROME Unkempt, isoform D OS=Drosophila mela	5	1	1	68.442	599	3.1757	2.8	2.8	2.8	1537900	2953800	13529000
A0A0B4LHR3;Q9GQN5	tr|A0A0B4LHR3|A0A0B4LHR3_DROME XNP, isoform C OS=Drosophila melanogaster GN=XNP PE=1 SV=1;sp|Q9GQN5|ATRX_DROME Transcriptional regulator ATRX homolog OS=Drosophila melanogaster GN=XNP PE=1 SV=2	2	1	1	119.48	1046	5.5792	1.4	1.4	1.4	1537900	6882100	16779000
Q95T12;D8FT42;F0JAK1	sp|Q95T12|FLOWR_DROME Calcium channel flower OS=Drosophila melanogaster GN=fwe PE=1 SV=1;tr|D8FT42|D8FT42_DROME RE70003p OS=Drosophila melanogaster PE=2 SV=1;tr|F0JAK1|F0JAK1_DROME RE04270p OS=Drosophila melanogaster GN=flower-RB PE=2 SV=1	3	2	2	20.62	194	11.343	3.6	12.9	12.9	1536400	16997000	17845000
Q9VS47	tr|Q9VS47|Q9VS47_DROME CG8602, isoform A OS=Drosophila melanogaster GN=anon-WO0118547.349 PE=2 SV=1	1	2	2	53.299	478	5.5485	2.1	6.1	4	1519500	28233000	18122000
X2J9P9;Q9VMA3;Q4V6K0	tr|X2J9P9|X2J9P9_DROME Cup, isoform C OS=Drosophila melanogaster GN=cup PE=4 SV=1;sp|Q9VMA3|CUP_DROME Protein cup OS=Drosophila melanogaster GN=cup PE=1 SV=3	3	7	7	125.67	1117	38.056	0.8	0	10.7	1500100	0	95256000
Q9VYV4;A9YGJ9;A9YGK3;F6J9S0;F6J9Q0	tr|Q9VYV4|Q9VYV4_DROME Amun, isoform A OS=Drosophila melanogaster GN=Amun PE=1 SV=1;tr|A9YGJ9|A9YGJ9_DROME CG2446 (Fragment) OS=Drosophila melanogaster GN=CG2446 PE=4 SV=1;tr|A9YGK3|A9YGK3_DROME CG2446 (Fragment) OS=Drosophila melanogaster GN=CG2446 PE=4 S	5	3	3	58.422	550	5.358	3.8	5.1	0	1498800	14044000	0
Q7KMM4	tr|Q7KMM4|Q7KMM4_DROME BcDNA.GH04962 OS=Drosophila melanogaster GN=GCS2alpha PE=1 SV=1	1	9	9	105.73	924	20.453	1.6	4	13.5	1484500	9560300	117370000
X2JGG6;P02517	tr|X2JGG6|X2JGG6_DROME Heat shock protein 26, isoform B OS=Drosophila melanogaster GN=Hsp26 PE=3 SV=1;sp|P02517|HSP26_DROME Heat shock protein 26 OS=Drosophila melanogaster GN=Hsp26 PE=1 SV=2	2	2	2	22.994	208	46.733	7.7	14.9	7.7	1482400	15788000	5528800
Q961R8;Q9VUK8;C9QP25	tr|Q961R8|Q961R8_DROME GH09263p OS=Drosophila melanogaster GN=GlyRS PE=1 SV=1;tr|Q9VUK8|Q9VUK8_DROME FI18749p1 OS=Drosophila melanogaster GN=GlyRS PE=1 SV=1;tr|C9QP25|C9QP25_DROME RE19272p OS=Drosophila melanogaster GN=Aats-gly-RB PE=2 SV=1	3	3	3	75.803	679	8.7021	1.6	0	6	1460700	0	30696000
Q5BI67;A8JUU1;X2JJP5;A8JUU3;X2JEY9;M9PHF1;X2JEM2;Q8T0U9	tr|Q5BI67|Q5BI67_DROME LP14866p OS=Drosophila melanogaster GN=Sec16 PE=2 SV=1;tr|A8JUU1|A8JUU1_DROME Secretory 16, isoform E OS=Drosophila melanogaster GN=Sec16 PE=1 SV=1;tr|X2JJP5|X2JJP5_DROME Secretory 16, isoform H OS=Drosophila melanogaster GN=Sec16 PE	8	4	4	213.17	1953	24.178	0.7	2.1	3.6	1457300	24106000	43941000
B7Z0B1;B7Z0B0;B7Z0A9;Q960W9	tr|B7Z0B1|B7Z0B1_DROME Sosondowah, isoform J OS=Drosophila melanogaster GN=sowah PE=1 SV=2;tr|B7Z0B0|B7Z0B0_DROME Sosondowah, isoform G OS=Drosophila melanogaster GN=sowah PE=1 SV=2;tr|B7Z0A9|B7Z0A9_DROME Sosondowah, isoform H OS=Drosophila melanogaster GN	4	3	3	60.488	548	4.9067	2.2	0	6.6	1449200	0	21490000
Q9VLC5;Q4QPQ0;B0F586;B0F584;A9J7N9;B0F593;B0F597;B0F590;B0F5A6;B0F585;B0F5B7;B0F5B2;B0F5B3;B0F5B1;B0F5A7	tr|Q9VLC5|Q9VLC5_DROME Aldehyde dehydrogenase OS=Drosophila melanogaster GN=Aldh PE=1 SV=1;tr|Q4QPQ0|Q4QPQ0_DROME GH22814p (Fragment) OS=Drosophila melanogaster PE=2 SV=1;tr|B0F586|B0F586_DROME Aldehyde dehydrogenase (Fragment) OS=Drosophila melanogaster G	15	6	6	57.018	520	23.064	4.2	2.7	16.7	1445600	5134700	181590000
Q9VHB5	tr|Q9VHB5|Q9VHB5_DROME SD10846p OS=Drosophila melanogaster GN=Vps45 PE=1 SV=1	1	2	2	65.078	574	2.3946	1.4	3.8	3.8	1428300	7106900	15432000
Q9VM75	sp|Q9VM75|HEAT1_DROME HEAT repeat-containing protein 1 homolog OS=Drosophila melanogaster GN=l(2)k09022 PE=2 SV=2	1	6	6	237.22	2096	25.032	1.2	4.2	0.4	1414400	30227000	5839100
Q9VCU5	sp|Q9VCU5|MTG1_DROME Mitochondrial ribosome-associated GTPase 1 OS=Drosophila melanogaster GN=CG17141 PE=1 SV=2	1	3	3	36.545	323	5.7798	2.5	6.5	6.2	1396100	2408600	8379700
Q95RK9;Q6A1Q0;B3DN53;Q7YU89;A1Z987	tr|Q95RK9|Q95RK9_DROME LD22256p OS=Drosophila melanogaster GN=Cap-G PE=2 SV=1;tr|Q6A1Q0|Q6A1Q0_DROME CAP-G protein OS=Drosophila melanogaster GN=Cap-G PE=4 SV=1;tr|B3DN53|B3DN53_DROME Chromosome associated protein G, isoform G OS=Drosophila melanogaster GN	5	2	2	85.379	743	5.0973	2.3	3.6	2.3	1395500	2481300	12141000
Q7JZR5	tr|Q7JZR5|Q7JZR5_DROME CG6796 OS=Drosophila melanogaster GN=AsnRS-m PE=1 SV=1	1	2	2	52.263	460	3.8181	2	4.1	2	1383200	21947000	9127200
M9PBV6;Q9Y109	tr|M9PBV6|M9PBV6_DROME CG7927, isoform B OS=Drosophila melanogaster GN=anon-WO0172774.138 PE=4 SV=1;tr|Q9Y109|Q9Y109_DROME BcDNA.GH11023 OS=Drosophila melanogaster GN=BcDNA.GH11023 PE=2 SV=1	2	1	1	73.408	653	3.0009	1.7	0	1.7	1378900	0	11414000
Q95S48;Q9VGC2	tr|Q95S48|Q95S48_DROME GM09085p OS=Drosophila melanogaster GN=CG4860 PE=2 SV=1;tr|Q9VGC2|Q9VGC2_DROME CG4860 OS=Drosophila melanogaster GN=Dmel\CG4860 PE=2 SV=1	2	3	3	35.83	333	15.545	2.7	17.1	6.6	1344500	12991000	17972000
P54397	sp|P54397|FKB39_DROME 39 kDa FK506-binding nuclear protein OS=Drosophila melanogaster GN=FK506-bp1 PE=1 SV=2	1	9	9	39.343	357	20.636	2	2.8	25.8	1344000	15304000	300860000
Q9VZM5	sp|Q9VZM5|PIGB_DROME GPI mannosyltransferase 3 OS=Drosophila melanogaster GN=PIG-B PE=2 SV=2	1	1	1	65.006	561	3.9615	3.4	3.4	0	1341900	2348800	0
A1Z6I7;O76755;Q7KN56	tr|A1Z6I7|A1Z6I7_DROME Bub1-related kinase OS=Drosophila melanogaster GN=BubR1 PE=1 SV=1;tr|O76755|O76755_DROME Mitotic checkpoint control protein kinase BUB1 OS=Drosophila melanogaster GN=BubR1 PE=2 SV=1;tr|Q7KN56|Q7KN56_DROME LD23835p (Fragment) OS=Droso	3	4	4	165.06	1460	14.926	2.7	0	4.9	1316000	0	49192000
B7Z0R2;A0A0B4KHD2;Q9VAS8	tr|B7Z0R2|B7Z0R2_DROME Sponge, isoform D OS=Drosophila melanogaster GN=spg PE=1 SV=2;tr|A0A0B4KHD2|A0A0B4KHD2_DROME Sponge, isoform F OS=Drosophila melanogaster GN=spg PE=1 SV=1;tr|Q9VAS8|Q9VAS8_DROME Sponge, isoform E OS=Drosophila melanogaster GN=spg PE=	3	6	6	227.05	2002	12.147	0.7	0	3.4	1309500	0	24504000
B5RJG4;Q9VFE6	tr|B5RJG4|B5RJG4_DROME FI09624p (Fragment) OS=Drosophila melanogaster GN=CG3817-RA PE=2 SV=1;sp|Q9VFE6|RRP15_DROME RRP15-like protein OS=Drosophila melanogaster GN=CG3817 PE=1 SV=1	2	2	2	31.664	280	11.451	3.6	8.9	8.9	1301600	38582000	32003000
Q9VKH0	sp|Q9VKH0|COG8_DROME Conserved oligomeric Golgi complex subunit 8 OS=Drosophila melanogaster GN=CG6488 PE=2 SV=1	1	1	1	64.909	570	2.2318	1.9	1.9	0	1298100	4484200	0
Q9VVS6	tr|Q9VVS6|Q9VVS6_DROME Autophagy-related protein 3 OS=Drosophila melanogaster GN=Atg3 PE=1 SV=1	1	1	1	37.012	330	2.5776	4.5	0	4.5	1275400	0	6981600
Q9VGV8	tr|Q9VGV8|Q9VGV8_DROME CG4511, isoform A OS=Drosophila melanogaster GN=Dmel\CG4511 PE=2 SV=1	1	1	1	25.109	216	2.8762	6	0	6	1265300	0	8434700
Q9VIF6;Q8MRB7	tr|Q9VIF6|Q9VIF6_DROME CG9253 OS=Drosophila melanogaster GN=DmRH24 PE=1 SV=1;tr|Q8MRB7|Q8MRB7_DROME RE27528p OS=Drosophila melanogaster GN=CG9253 PE=2 SV=1	2	5	5	56.486	507	49.525	2.2	14.2	10.7	1257000	48499000	69136000
Q9GU73;Q9VAN7;A5XD89;A5XD88;A5XD87;A5XD86;A5XD83	tr|Q9GU73|Q9GU73_DROME Phosphoglycerate mutase (Fragment) OS=Drosophila melanogaster GN=Pglym78 PE=4 SV=1;tr|Q9VAN7|Q9VAN7_DROME Phosphoglycerate mutase OS=Drosophila melanogaster GN=Pglym78 PE=1 SV=2;tr|A5XD89|A5XD89_DROME Phosphoglycerate mutase (Fragmen	7	2	2	24.499	220	3.6168	4.5	8.6	0	1235500	5003400	0
Q24472	sp|Q24472|RBF_DROME Retinoblastoma family protein OS=Drosophila melanogaster GN=Rbf PE=1 SV=2	1	2	2	96.825	845	4.6908	1.3	3	3	1232300	7702900	16263000
Q9U4F8	tr|Q9U4F8|Q9U4F8_DROME BcDNA.LD34475 OS=Drosophila melanogaster GN=BcDNA.LD34475 PE=1 SV=1	1	3	3	113.06	993	29.115	4.8	6	6	1225600	17101000	18612000
Q9W0M0;Q8MR61	tr|Q9W0M0|Q9W0M0_DROME Uncharacterized protein OS=Drosophila melanogaster GN=Dmel\CG13890 PE=1 SV=1;tr|Q8MR61|Q8MR61_DROME GH11143p (Fragment) OS=Drosophila melanogaster GN=CG13890 PE=2 SV=1	2	1	1	29.203	262	2.333	3.4	0	3.4	1225000	0	7842100
A0A0B4KH51;Q9Y0S9;A0A0B4K774	tr|A0A0B4KH51|A0A0B4KH51_DROME Abelson interacting protein, isoform C OS=Drosophila melanogaster GN=Abi PE=1 SV=1;tr|Q9Y0S9|Q9Y0S9_DROME Abelson interacting protein, isoform A OS=Drosophila melanogaster GN=Abi PE=1 SV=1;tr|A0A0B4K774|A0A0B4K774_DROME Abels	3	3	3	51.854	472	4.3932	4.9	0	9.7	1218000	0	26591000
Q9W1R5	sp|Q9W1R5|VIR_DROME Protein virilizer OS=Drosophila melanogaster GN=vir PE=1 SV=1	1	2	2	209	1854	3.3587	1	1	0.6	1211400	2930500	0
M9PBS9;M9PEJ2;M9PHL4;M9PES8;M9PEC1;Q9VRY6	tr|M9PBS9|M9PBS9_DROME Uncharacterized protein, isoform F OS=Drosophila melanogaster GN=Dmel\CG10103 PE=1 SV=1;tr|M9PEJ2|M9PEJ2_DROME Uncharacterized protein, isoform D OS=Drosophila melanogaster GN=Dmel\CG10103 PE=1 SV=1;tr|M9PHL4|M9PHL4_DROME Uncharacter	6	1	1	35.623	327	2.6261	3.7	3.7	3.7	1199400	1645200	8612400
Q8IMT3	tr|Q8IMT3|Q8IMT3_DROME IP12392p OS=Drosophila melanogaster GN=Dmel\CG31436 PE=2 SV=1	1	2	2	49.657	420	2.8089	2.1	2.1	4	1191900	3252900	17497000
I1WYG8;Q9VPH2	tr|I1WYG8|I1WYG8_DROME DNA primase large subunit OS=Drosophila melanogaster GN=DNApol-alpha60-RA PE=2 SV=1;sp|Q9VPH2|PRI2_DROME DNA primase large subunit OS=Drosophila melanogaster GN=DNApol-alpha60 PE=1 SV=2	2	1	1	61.435	533	10.176	2.1	2.1	2.1	1185800	3394100	13208000
Q95RC5	tr|Q95RC5|Q95RC5_DROME CG5745 OS=Drosophila melanogaster GN=Dmel\CG5745 PE=2 SV=1	1	2	2	61.511	546	4.8839	1.5	0	4.6	1182900	0	14334000
A0A0C4DHE7;Q8IMY1;P54385	tr|A0A0C4DHE7|A0A0C4DHE7_DROME Glutamate dehydrogenase OS=Drosophila melanogaster GN=Gdh PE=1 SV=1;tr|Q8IMY1|Q8IMY1_DROME Glutamate dehydrogenase OS=Drosophila melanogaster GN=Gdh PE=1 SV=1;sp|P54385|DHE3_DROME Glutamate dehydrogenase, mitochondrial OS=Dro	3	1	1	43.064	391	2.6617	4.1	0	4.1	1170300	0	8268900
P32748	sp|P32748|PYRD_DROME Dihydroorotate dehydrogenase (quinone), mitochondrial OS=Drosophila melanogaster GN=Dhod PE=2 SV=2	1	5	5	44.341	405	72.576	3.5	15.3	24.4	1167700	33443000	63095000
Q7K0X3	tr|Q7K0X3|Q7K0X3_DROME CG2469, isoform A OS=Drosophila melanogaster GN=Ctr9 PE=1 SV=1	1	2	2	130.47	1150	5.6961	1	1	2.6	1155600	4514800	0
C8VV50;Q9VU68	tr|C8VV50|C8VV50_DROME RE63353p OS=Drosophila melanogaster GN=CG10724-RB PE=2 SV=1;sp|Q9VU68|WDR1_DROME Actin-interacting protein 1 OS=Drosophila melanogaster GN=flr PE=2 SV=1	2	2	2	66.111	604	5.9491	1.8	5	3.1	1150600	13279000	12957000
X2JEF0;B7FNK0;P12646	tr|X2JEF0|X2JEF0_DROME Glucose-6-phosphate 1-dehydrogenase OS=Drosophila melanogaster GN=Zw PE=1 SV=1;tr|B7FNK0|B7FNK0_DROME Glucose-6-phosphate 1-dehydrogenase OS=Drosophila melanogaster GN=Zw-RA PE=2 SV=1;sp|P12646|G6PD_DROME Glucose-6-phosphate 1-dehydr	3	2	2	57.991	502	6.5368	3.2	3.2	7.8	1118100	5352300	9685100
A1Z968;Q5KTT4;Q86NR8;Q0E996	tr|A1Z968|A1Z968_DROME NAT1, isoform D OS=Drosophila melanogaster GN=NAT1 PE=1 SV=1;tr|Q5KTT4|Q5KTT4_DROME Uncharacterized protein dNAT1 (Fragment) OS=Drosophila melanogaster GN=dNAT1 PE=2 SV=1;tr|Q86NR8|Q86NR8_DROME RE34257p OS=Drosophila melanogaster GN=	4	5	5	162.87	1488	23.713	0.7	1.6	5.7	1116500	11237000	50225000
Q9VFE7	tr|Q9VFE7|Q9VFE7_DROME Nuclear pore protein OS=Drosophila melanogaster GN=Nup93-2 PE=1 SV=1	1	9	9	90.598	796	40.795	2.1	12.6	14.3	1098200	27434000	109520000
X2JA43;Q9W590	tr|X2JA43|X2JA43_DROME Nucleostemin 3, isoform B OS=Drosophila melanogaster GN=Ns3 PE=4 SV=1;sp|Q9W590|LSG1_DROME Large subunit GTPase 1 homolog OS=Drosophila melanogaster GN=Ns3 PE=1 SV=1	2	2	2	70.245	606	3.0558	1.3	0	3	1068600	0	12787000
Q24021;Q9VS37	tr|Q24021|Q24021_DROME CDC27Dm OS=Drosophila melanogaster GN=Cdc27 PE=2 SV=1;tr|Q9VS37|Q9VS37_DROME Cell division cycle 27, isoform A OS=Drosophila melanogaster GN=Cdc27 PE=1 SV=1	2	1	1	97.658	875	6.3329	1.8	1.8	1.8	1061200	5504200	14293000
Q9VDZ4	tr|Q9VDZ4|Q9VDZ4_DROME LD16340p OS=Drosophila melanogaster GN=Nsun5 PE=1 SV=1	1	1	1	49.279	433	3.8275	2.3	0	2.3	1056600	0	7243200
Q9W4M9	sp|Q9W4M9|NSUN2_DROME tRNA (cytosine(34)-C(5))-methyltransferase OS=Drosophila melanogaster GN=Nsun2 PE=2 SV=1	1	8	8	84.161	746	25.682	2.1	11.7	16.4	1051800	39599000	128420000
Q9W425;Q24593	tr|Q9W425|Q9W425_DROME Rabconnectin-3A OS=Drosophila melanogaster GN=Rbcn-3A PE=1 SV=3;tr|Q24593|Q24593_DROME Uncharacterized protein DmX OS=Drosophila melanogaster GN=Rbcn-3A PE=4 SV=1	2	8	8	377.32	3426	15.009	0.2	0	3.1	1047500	0	64209000
I0DHK3;P12881	tr|I0DHK3|I0DHK3_DROME Proteasome subunit alpha type OS=Drosophila melanogaster GN=Prosalpha6 PE=2 SV=1;sp|P12881|PSA1_DROME Proteasome subunit alpha type-1 OS=Drosophila melanogaster GN=Prosalpha6 PE=1 SV=1	2	2	2	31.058	279	5.5286	12.5	0	7.2	1044400	0	8717300
Q9VYG8;C0MLD8;C0MLC9;B4F5F8;B4F5F6;B4F5F5;B4F5F4;B4F5F3;B4F5F2;B4F5F0	tr|Q9VYG8|Q9VYG8_DROME CG15717-PA OS=Drosophila melanogaster GN=Dmel\CG15717 PE=1 SV=1;tr|C0MLD8|C0MLD8_DROME CG15717-PA OS=Drosophila melanogaster GN=CG15717 PE=4 SV=1;tr|C0MLC9|C0MLC9_DROME CG15717-PA OS=Drosophila melanogaster GN=CG15717 PE=4 SV=1;tr|B4	10	1	1	27.766	252	2.3803	4.8	4.8	4.8	1034500	2570700	6384000
A0A0B4KF92;A0A0B4LGS6;Q9VNC3;A0A0B4LGM5	tr|A0A0B4KF92|A0A0B4KF92_DROME Holocarboxylase synthetase, isoform B OS=Drosophila melanogaster GN=Hcs PE=1 SV=1;tr|A0A0B4LGS6|A0A0B4LGS6_DROME Holocarboxylase synthetase, isoform D OS=Drosophila melanogaster GN=Hcs PE=1 SV=1;tr|Q9VNC3|Q9VNC3_DROME Holocar	4	1	1	110.35	993	2.4641	1.3	0	0	1006300	0	0
A0A0B4KHM2;Q9XZ58	tr|A0A0B4KHM2|A0A0B4KHM2_DROME COP9 signalosome subunit 5, isoform B OS=Drosophila melanogaster GN=CSN5 PE=4 SV=1;sp|Q9XZ58|CSN5_DROME COP9 signalosome complex subunit 5 OS=Drosophila melanogaster GN=CSN5 PE=1 SV=1	2	1	1	36.87	325	2.618	2.5	0	2.5	1005400	0	9380500
Q9W0T7;Q8IRJ7;Q6AWL1	tr|Q9W0T7|Q9W0T7_DROME LD37985p OS=Drosophila melanogaster GN=Dis3l2 PE=1 SV=2;tr|Q8IRJ7|Q8IRJ7_DROME FI04463p OS=Drosophila melanogaster GN=Dis3l2 PE=1 SV=1;tr|Q6AWL1|Q6AWL1_DROME RE03681p OS=Drosophila melanogaster PE=2 SV=1	3	3	3	116.84	1032	9.7298	1.3	2.9	4.1	998450	10846000	22991000
Q24317	sp|Q24317|PRI1_DROME DNA primase small subunit OS=Drosophila melanogaster GN=DNApol-alpha50 PE=2 SV=2	1	3	3	50.221	438	7.8142	2.3	2.3	9.1	997600	3527700	24173000
Q9VPL0	tr|Q9VPL0|Q9VPL0_DROME CG3436, isoform A OS=Drosophila melanogaster GN=Dmel\CG3436 PE=1 SV=1	1	2	2	38.859	347	4.1686	3.5	3.5	7.2	995610	5927800	12405000
Q9VL25	tr|Q9VL25|Q9VL25_DROME CG4901, isoform A OS=Drosophila melanogaster GN=Dmel\CG4901 PE=1 SV=2	1	2	2	78.318	694	4.1426	1.7	3.9	1.7	964290	7751000	5764600
A0A0H4YFU3;Q9I7T7	tr|A0A0H4YFU3|A0A0H4YFU3_DROME FI24706p1 OS=Drosophila melanogaster GN=CG11505-RD PE=2 SV=1;sp|Q9I7T7|Y1505_DROME La-related protein CG11505 OS=Drosophila melanogaster GN=CG11505 PE=1 SV=2	2	2	2	160.77	1521	4.5645	0.9	0	0.9	955190	0	21016000
O76922	sp|O76922|AUB_DROME Protein aubergine OS=Drosophila melanogaster GN=aub PE=1 SV=1	1	5	5	98.558	866	14.628	2.8	0	7.2	946400	0	47208000
A0A0B4K7L0;D0Z764;Q9W252	tr|A0A0B4K7L0|A0A0B4K7L0_DROME Rad50, isoform E OS=Drosophila melanogaster GN=rad50 PE=1 SV=1;tr|D0Z764|D0Z764_DROME FI13085p (Fragment) OS=Drosophila melanogaster GN=rad50-RB PE=2 SV=1;sp|Q9W252|RAD50_DROME DNA repair protein RAD50 OS=Drosophila melanogas	3	3	3	152.13	1318	11.563	0.9	0.9	3.1	944510	2028700	34460000
Q9V4E0	tr|Q9V4E0|Q9V4E0_DROME LD47962p OS=Drosophila melanogaster GN=ND-49 PE=1 SV=2	1	1	1	52.92	468	2.6847	1.9	1.9	1.9	943580	3916800	14070000
Q4V5E9;Q9VPR5	tr|Q4V5E9|Q4V5E9_DROME RH74732p (Fragment) OS=Drosophila melanogaster GN=CG2807 PE=2 SV=1;tr|Q9VPR5|Q9VPR5_DROME CG2807, isoform A OS=Drosophila melanogaster GN=Sf3b1 PE=1 SV=2	2	3	3	146.7	1316	7.464	1.2	3.3	2	937230	22231000	7382000
H0RNM3;B8A3X9;Q9VC45	tr|H0RNM3|H0RNM3_DROME FI18026p1 OS=Drosophila melanogaster GN=asp-RA PE=2 SV=1;tr|B8A3X9|B8A3X9_DROME LD18929p OS=Drosophila melanogaster GN=asp-RA PE=2 SV=1;sp|Q9VC45|ASP_DROME Protein abnormal spindle OS=Drosophila melanogaster GN=asp PE=1 SV=3	3	1	1	230.18	1954	2.3673	0.6	0	0.6	936700	0	5836700
Q9V3V9	tr|Q9V3V9|Q9V3V9_DROME Endonuclease G inhibitor, isoform A OS=Drosophila melanogaster GN=EndoGI PE=1 SV=1	1	1	1	40.614	359	1.9227	3.9	3.9	0	931160	2061300	0
Q9VDS6	sp|Q9VDS6|SURF6_DROME Surfeit locus protein 6 homolog OS=Drosophila melanogaster GN=Surf6 PE=1 SV=1	1	3	3	38.134	324	24.832	2.8	13.3	13.3	925300	38938000	51494000
M9NF33;Q9VSH4	tr|M9NF33|M9NF33_DROME CG7185, isoform B OS=Drosophila melanogaster GN=CFlm-68k PE=4 SV=1;sp|Q9VSH4|CPSF6_DROME Cleavage and polyadenylation specificity factor subunit CG7185 OS=Drosophila melanogaster GN=CG7185 PE=1 SV=2	2	5	5	66.125	605	30.994	4.1	10.4	11.7	859510	19951000	104750000
Q9VHI1	tr|Q9VHI1|Q9VHI1_DROME Hyrax OS=Drosophila melanogaster GN=hyx PE=2 SV=1	1	2	2	61.384	538	4.0227	2.4	0	6.5	853720	0	17791000
Q9VEB1	tr|Q9VEB1|Q9VEB1_DROME IP09655p OS=Drosophila melanogaster GN=Mdh2 PE=1 SV=1	1	2	2	35.318	336	3.7561	3.3	7.1	0	847180	10877000	0
Q9VMJ2	tr|Q9VMJ2|Q9VMJ2_DROME RT07854p OS=Drosophila melanogaster GN=Dmel\CG13996 PE=2 SV=1	1	1	1	30.023	256	-2	3.5	3.5	3.5	846000	80669000	7263200
Q9VLW8;Q2Q0L4;Q2Q0L3;Q2Q0L0;Q2Q0K9;Q2Q0K8;Q2Q0K7	tr|Q9VLW8|Q9VLW8_DROME LD06392p OS=Drosophila melanogaster GN=r2d2 PE=1 SV=1;tr|Q2Q0L4|Q2Q0L4_DROME R2D2 OS=Drosophila melanogaster GN=r2d2 PE=4 SV=1;tr|Q2Q0L3|Q2Q0L3_DROME R2D2 OS=Drosophila melanogaster GN=r2d2 PE=4 SV=1;tr|Q2Q0L0|Q2Q0L0_DROME R2D2 OS=Dr	7	2	2	35.069	311	2.729	4.2	8	4.2	842280	9818300	9652200
Q9W0G6	sp|Q9W0G6|MSD5_DROME Augmin complex subunit msd5 OS=Drosophila melanogaster GN=msd5 PE=1 SV=1	1	2	2	28.461	253	4.3105	5.1	0	9.5	841170	0	16521000
Q9VQL4;Q8SZK7;Q8IPZ3	tr|Q9VQL4|Q9VQL4_DROME Uncharacterized protein, isoform B OS=Drosophila melanogaster GN=DM_7295851 PE=4 SV=1;tr|Q8SZK7|Q8SZK7_DROME RH24774p OS=Drosophila melanogaster GN=CG17221 PE=2 SV=1;tr|Q8IPZ3|Q8IPZ3_DROME FI02982p OS=Drosophila melanogaster GN=DM_72	3	1	1	39.067	362	1.964	3	3	3	830860	2671200	5442700
X2JEX7;Q9VYQ8	tr|X2JEX7|X2JEX7_DROME Ubiquitin-specific protease 7, isoform C OS=Drosophila melanogaster GN=Usp7 PE=3 SV=1;sp|Q9VYQ8|UBP7_DROME Ubiquitin carboxyl-terminal hydrolase 7 OS=Drosophila melanogaster GN=Usp7 PE=1 SV=1	2	2	2	130.05	1125	17.167	1.2	0	2.7	803080	0	5207800
A8DYJ3;A0A0B4LG26;Q11002	tr|A8DYJ3|A8DYJ3_DROME Calpain-A, isoform C OS=Drosophila melanogaster GN=CalpA PE=1 SV=1;tr|A0A0B4LG26|A0A0B4LG26_DROME Calpain-A, isoform D OS=Drosophila melanogaster GN=CalpA PE=1 SV=1;sp|Q11002|CANA_DROME Calpain-A OS=Drosophila melanogaster GN=CalpA P	3	4	3	93.962	828	17.037	1.2	1.2	7.4	791600	2312600	43907000
O02373	sp|O02373|UGDH_DROME UDP-glucose 6-dehydrogenase OS=Drosophila melanogaster GN=sgl PE=1 SV=1	1	4	4	52.874	476	17.679	5	8.6	6.3	782310	11123000	43653000
M9NFC6	tr|M9NFC6|M9NFC6_DROME Uncharacterized protein, isoform B OS=Drosophila melanogaster GN=lincRNA.1011 PE=4 SV=1	1	1	1	9.2388	82	-2	11	0	11	781370	0	43502000
D3DMX2;Q24311	tr|D3DMX2|D3DMX2_DROME AT30355p OS=Drosophila melanogaster GN=lin19-RC PE=2 SV=1;sp|Q24311|CUL1_DROME Cullin homolog 1 OS=Drosophila melanogaster GN=Cul1 PE=1 SV=2	2	2	2	89.476	774	6.9075	1.2	0	3.5	772510	0	13707000
Q8I725;Q8MR05	tr|Q8I725|Q8I725_DROME CG1236 OS=Drosophila melanogaster GN=Dmel\CG1236 PE=1 SV=2;tr|Q8MR05|Q8MR05_DROME LD48009p (Fragment) OS=Drosophila melanogaster GN=CG1236 PE=2 SV=1	2	4	4	38.374	347	19.537	7.2	0	19.9	739700	0	30959000
Q86PC5;A0A0B4LFJ8;Q95S44;A1ZAU6	tr|Q86PC5|Q86PC5_DROME SD26770p OS=Drosophila melanogaster GN=CG4853 PE=2 SV=1;tr|A0A0B4LFJ8|A0A0B4LFJ8_DROME CG4853, isoform C OS=Drosophila melanogaster GN=CG4853 PE=1 SV=1;tr|Q95S44|Q95S44_DROME GM09415p OS=Drosophila melanogaster GN=CG4853 PE=2 SV=1;tr	4	1	1	58.52	522	1.9726	2.1	0	2.1	727690	0	4130300
Q9W4Z9;O46069	tr|Q9W4Z9|Q9W4Z9_DROME CG3071 OS=Drosophila melanogaster GN=EG:25E8.3 PE=1 SV=1;tr|O46069|O46069_DROME EG:25E8.3 protein OS=Drosophila melanogaster GN=EG:25E8.3 PE=4 SV=1	2	2	2	60.369	535	6.1876	2.4	4.7	4.7	678600	15035000	16644000
M9NDP2;B7Z0G3;Q9VTJ8	tr|M9NDP2|M9NDP2_DROME CG7394, isoform C OS=Drosophila melanogaster GN=BcDNA:RE52392 PE=2 SV=1;tr|B7Z0G3|B7Z0G3_DROME CG7394, isoform B OS=Drosophila melanogaster GN=BcDNA:RE52392 PE=4 SV=1;sp|Q9VTJ8|TIM14_DROME Mitochondrial import inner membrane transloc	3	1	1	12.868	118	5.1851	16.1	16.1	16.1	656180	2195900	3226900
M9NDM3;M9PEJ8;M9PBW9;Q9VSL8;D0IQH8;M9PF06;Q960C2	tr|M9NDM3|M9NDM3_DROME Rhea, isoform C OS=Drosophila melanogaster GN=rhea PE=1 SV=1;tr|M9PEJ8|M9PEJ8_DROME Rhea, isoform H OS=Drosophila melanogaster GN=rhea PE=1 SV=1;tr|M9PBW9|M9PBW9_DROME Rhea, isoform G OS=Drosophila melanogaster GN=rhea PE=1 SV=1;tr|Q	7	3	3	235.28	2169	14.406	0.6	0.6	2.8	635130	2055300	20580000
Q9W351	tr|Q9W351|Q9W351_DROME LD42637p OS=Drosophila melanogaster GN=Aladin PE=1 SV=1	1	3	3	52.278	466	9.2997	5.2	10.5	10.5	634120	8727200	15695000
Q9VFP1	sp|Q9VFP1|CP6D5_DROME Probable cytochrome P450 6d5 OS=Drosophila melanogaster GN=Cyp6d5 PE=2 SV=1	1	1	1	57.384	508	3.0904	2	2	2	607470	4082000	2497600
Q95TR0;E1JJS2;Q6IDH3;M9NFH4;Q9VRA6;X2JEI9	tr|Q95TR0|Q95TR0_DROME LD29482p OS=Drosophila melanogaster GN=RhoGAP19D PE=2 SV=1;tr|E1JJS2|E1JJS2_DROME Rho GTPase activating protein at 19D, isoform B OS=Drosophila melanogaster GN=RhoGAP19D PE=1 SV=1;tr|Q6IDH3|Q6IDH3_DROME SD12316p OS=Drosophila melanog	6	2	2	163.05	1553	4.1461	0.8	0	1.6	541780	0	14616000
Q9W246	tr|Q9W246|Q9W246_DROME CG4554 OS=Drosophila melanogaster GN=CG4554 PE=1 SV=2	1	4	4	311.9	2733	9.3934	0.4	1.9	0.3	461540	19794000	3914400
A0A0B4K603;A0A0B4K6V2;A0A0B4KF90;A0A0B4K631;A0A0B4KGC6;C1C3H4;B7Z0U7;A0A0B4KFE2;E1JJ78;Q9VI75	tr|A0A0B4K603|A0A0B4K603_DROME Like-AP180, isoform E OS=Drosophila melanogaster GN=lap PE=1 SV=1;tr|A0A0B4K6V2|A0A0B4K6V2_DROME Like-AP180, isoform G OS=Drosophila melanogaster GN=lap PE=1 SV=1;tr|A0A0B4KF90|A0A0B4KF90_DROME Like-AP180, isoform J OS=Drosop	10	1	1	61.702	572	3.2093	0	0	3.3	0	0	8038800
A0A0B4K6W1;P08970	tr|A0A0B4K6W1|A0A0B4K6W1_DROME Suppressor of hairy wing, isoform C OS=Drosophila melanogaster GN=su(Hw) PE=4 SV=1;sp|P08970|SUHW_DROME Protein suppressor of hairy wing OS=Drosophila melanogaster GN=su(Hw) PE=1 SV=2	2	1	1	105.78	941	4.7149	0	0	2.2	0	0	5712300
A0A0B4KF05;Q9V359	tr|A0A0B4KF05|A0A0B4KF05_DROME Vacuolar protein sorting-associated protein 28 homolog OS=Drosophila melanogaster GN=Vps28 PE=3 SV=1;sp|Q9V359|VPS28_DROME Vacuolar protein sorting-associated protein 28 homolog OS=Drosophila melanogaster GN=Vps28 PE=1 SV=1	2	2	2	24.512	210	5.4824	7.1	7.1	12.4	0	2740900	18707000
A0A0B4KFE5;Q04448	tr|A0A0B4KFE5|A0A0B4KFE5_DROME NAD-dependent methylenetetrahydrofolate dehydrogenase, isoform C OS=Drosophila melanogaster GN=Nmdmc PE=3 SV=1;sp|Q04448|MTDC_DROME Bifunctional methylenetetrahydrofolate dehydrogenase/cyclohydrolase, mitochondrial OS=Drosoph	2	1	1	32.814	303	2.1271	0	9.9	0	0	31004000	0
A0A0B4KFE9;A1Z8P9;Q8IGK6;B5RJS5	tr|A0A0B4KFE9|A0A0B4KFE9_DROME Megator, isoform B OS=Drosophila melanogaster GN=Mtor PE=1 SV=1;sp|A1Z8P9|TPR_DROME Nucleoprotein TPR OS=Drosophila melanogaster GN=Mtor PE=1 SV=1	4	4	4	262.35	2346	7.9693	0	0	2.1	0	0	24808000
A0A0B4KGU0;A0A0B4KFR6;H1UUI3;Q9VGK7;Q5BID1	tr|A0A0B4KGU0|A0A0B4KGU0_DROME Elongator complex protein 1 OS=Drosophila melanogaster GN=Elp1 PE=1 SV=1;tr|A0A0B4KFR6|A0A0B4KFR6_DROME Elongator complex protein 1 OS=Drosophila melanogaster GN=Elp1 PE=1 SV=1;tr|H1UUI3|H1UUI3_DROME FI18107p1 (Fragment) OS=D	5	5	5	142.88	1253	17.514	0	3.3	4.8	0	15968000	36528000
A0A0B4KHB1;Q7KSE8;A0A0B4KGD1;E1JIN6;Q8IN94;B6IDZ6	tr|A0A0B4KHB1|A0A0B4KHB1_DROME Osa, isoform E OS=Drosophila melanogaster GN=osa PE=1 SV=1;tr|Q7KSE8|Q7KSE8_DROME Osa, isoform C OS=Drosophila melanogaster GN=osa PE=1 SV=1;tr|A0A0B4KGD1|A0A0B4KGD1_DROME Osa, isoform F OS=Drosophila melanogaster GN=osa PE=1	6	2	2	268.84	2555	4.6543	0.3	0.7	0.3	0	11840000	6899300
A0A0B4LEV3;Q7JWR9	tr|A0A0B4LEV3|A0A0B4LEV3_DROME CG8635, isoform B OS=Drosophila melanogaster GN=CG8635 PE=4 SV=1;sp|Q7JWR9|ZC3HF_DROME Zinc finger CCCH domain-containing protein 15 homolog OS=Drosophila melanogaster GN=CG8635 PE=1 SV=1	2	2	2	45.291	404	3.9041	0	2.5	5	0	7147500	29700000
A0A0B4LGT4;Q9VHV5	tr|A0A0B4LGT4|A0A0B4LGT4_DROME GTPase indispensable for equal segregation of chromosomes, isoform B OS=Drosophila melanogaster GN=Gie PE=3 SV=1;sp|Q9VHV5|ARL8_DROME ADP-ribosylation factor-like protein 8 OS=Drosophila melanogaster GN=Gie PE=1 SV=1	2	1	1	21.253	186	2.0195	0	0	7.5	0	0	69107000
A0A0B4LH64;Q8SWR8	tr|A0A0B4LH64|A0A0B4LH64_DROME Ataxin-2, isoform D OS=Drosophila melanogaster GN=Atx2 PE=4 SV=1;sp|Q8SWR8|ATX2_DROME Ataxin-2 homolog OS=Drosophila melanogaster GN=Atx2 PE=1 SV=1	2	2	2	111.41	1023	5.1586	0	1.5	2.4	0	5793100	26380000
A0A0B4LH72;Q9VF08	tr|A0A0B4LH72|A0A0B4LH72_DROME Black pearl, isoform B OS=Drosophila melanogaster GN=blp PE=2 SV=1;sp|Q9VF08|TIM16_DROME Mitochondrial import inner membrane translocase subunit Tim16 OS=Drosophila melanogaster GN=blp PE=2 SV=1	2	2	2	15.73	141	7.3343	6.4	18.4	18.4	0	3242700	27722000
A0A0B4LIF3;A0A0H4Y1G0;A0A0B4KGH5;Q86NP2	tr|A0A0B4LIF3|A0A0B4LIF3_DROME Negative elongation factor A, isoform C OS=Drosophila melanogaster GN=Nelf-A PE=4 SV=1;tr|A0A0H4Y1G0|A0A0H4Y1G0_DROME FI24705p1 OS=Drosophila melanogaster GN=Nelf-A-RB PE=2 SV=1;tr|A0A0B4KGH5|A0A0B4KGH5_DROME Negative elongat	4	1	1	134.82	1250	2.8951	0	0	1.2	0	0	8689400
A0A0B7P9G0	tr|A0A0B7P9G0|A0A0B7P9G0_DROME Unextended, isoform E OS=Drosophila melanogaster GN=uex PE=1 SV=1	1	2	2	93.282	834	4.6212	0	1.4	1.1	0	0	0
A0A0C4DHA1;Q2M1E6;A8JQT5	tr|A0A0C4DHA1|A0A0C4DHA1_DROME Chondrocyte-derived ezrin-like domain containing protein, isoform F OS=Drosophila melanogaster GN=Cdep PE=1 SV=1;tr|Q2M1E6|Q2M1E6_DROME Chondrocyte-derived ezrin-like domain containing protein, isoform E OS=Drosophila melanog	3	2	2	131.6	1163	5.6446	0	0	2.6	0	0	18189000
A0A0S0X119;X2JFU3;M9MSF4;F3YDC5;A8WHD5;M9MSQ1;Q9VX80	tr|A0A0S0X119|A0A0S0X119_DROME CG5004, isoform F OS=Drosophila melanogaster GN=anon-15Db PE=4 SV=1;tr|X2JFU3|X2JFU3_DROME CG5004, isoform E OS=Drosophila melanogaster GN=anon-15Db PE=4 SV=1;tr|M9MSF4|M9MSF4_DROME CG5004, isoform D OS=Drosophila melanogaste	7	1	1	24.228	221	3.9019	0	0	5.9	0	0	0
A0A0U3DWR7;Q8T0T0;A0A0B4KEY6;A0A0B4KFU3;A0A0B4KG58;B7YZJ2;B7YZJ1;E1JH90;A0A0B4KET5;A0A0B4KFA4;E1JH91;H6WS59;A0A0B4KEY4;A1ZAU8	tr|A0A0U3DWR7|A0A0U3DWR7_DROME Patronin OS=Drosophila melanogaster PE=2 SV=1;tr|Q8T0T0|Q8T0T0_DROME GH09618p OS=Drosophila melanogaster GN=Patronin PE=2 SV=1;tr|A0A0B4KEY6|A0A0B4KEY6_DROME Patronin, isoform N OS=Drosophila melanogaster GN=Patronin PE=1 SV=	14	7	7	155.67	1384	20.1	0	0	7.4	0	0	89722000
A0A1B2AK02;Q9GU68	tr|A0A1B2AK02|A0A1B2AK02_DROME Eukaryotic translation initiation factor 5A (Fragment) OS=Drosophila melanogaster PE=2 SV=1;sp|Q9GU68|IF5A_DROME Eukaryotic translation initiation factor 5A OS=Drosophila melanogaster GN=eIF-5A PE=2 SV=2	2	1	1	17.591	159	4.7064	0	9.4	9.4	0	4956200	23382000
A0A1B2AK92;P52656	tr|A0A1B2AK92|A0A1B2AK92_DROME GEO12601p1 (Fragment) OS=Drosophila melanogaster PE=2 SV=1;sp|P52656|T2AG_DROME Transcription initiation factor IIA subunit 2 OS=Drosophila melanogaster GN=TfIIA-S PE=1 SV=1	2	1	1	12.193	106	4.4146	0	26.4	26.4	0	6485100	1598700
A0A1B2AKI4;P49963	tr|A0A1B2AKI4|A0A1B2AKI4_DROME GEO08417p1 (Fragment) OS=Drosophila melanogaster PE=2 SV=1;sp|P49963|SRP19_DROME Signal recognition particle 19 kDa protein OS=Drosophila melanogaster GN=Srp19 PE=2 SV=2	2	1	1	18.395	160	2.0785	0	8.8	8.8	0	0	14548000
A0T1Z5;B7Z0J2;A0T1Z4;Q9VFU8	tr|A0T1Z5|A0T1Z5_DROME Yurt delta OS=Drosophila melanogaster GN=yrt PE=2 SV=1;tr|B7Z0J2|B7Z0J2_DROME Yurt, isoform D OS=Drosophila melanogaster GN=yrt PE=4 SV=1;tr|A0T1Z4|A0T1Z4_DROME Yurt gamma OS=Drosophila melanogaster GN=yrt PE=2 SV=1;tr|Q9VFU8|Q9VFU8_	4	1	1	86.497	786	2.7998	0	0	2.3	0	0	6346100
A1A6R5;X2J9X1;P49866	tr|A1A6R5|A1A6R5_DROME IP16932p (Fragment) OS=Drosophila melanogaster GN=Hnf4 PE=2 SV=1;tr|X2J9X1|X2J9X1_DROME Hepatocyte nuclear factor 4, isoform F OS=Drosophila melanogaster GN=Hnf4 PE=1 SV=1;sp|P49866|HNF4_DROME Transcription factor HNF-4 homolog OS=Dr	3	1	1	45.243	415	-2	0	5.5	0	0	7731200	0
A1Z7K8;Q8SYK9	tr|A1Z7K8|A1Z7K8_DROME CG8235 OS=Drosophila melanogaster GN=AIMP1 PE=1 SV=1;tr|Q8SYK9|Q8SYK9_DROME RE55091p OS=Drosophila melanogaster GN=AIMP1 PE=2 SV=1	2	2	2	34.401	323	10.791	0	10.5	10.5	0	17590000	24353000
A1Z992;U3NIM6;Q8T0H4;B5RJS1	tr|A1Z992|A1Z992_DROME 1,4-Alpha-Glucan branching enzyme OS=Drosophila melanogaster GN=AGBE PE=1 SV=1;tr|U3NIM6|U3NIM6_DROME FI23925p1 (Fragment) OS=Drosophila melanogaster GN=AGBE-RA PE=2 SV=1;tr|Q8T0H4|Q8T0H4_DROME Alpha-amylase OS=Drosophila melanogaste	4	2	2	79.108	685	8.8924	0	6	6	0	9985800	33112000
A1Z9X0;A0A0B4JD26;A0A0B4KFQ6;A0A0B4KEQ8;A0A0B4KEV2;A0A0B4JD78;A0A0B4KG15	sp|A1Z9X0|APKC_DROME Atypical protein kinase C OS=Drosophila melanogaster GN=aPKC PE=1 SV=1;tr|A0A0B4JD26|A0A0B4JD26_DROME Atypical protein kinase C, isoform I OS=Drosophila melanogaster GN=aPKC PE=1 SV=1;tr|A0A0B4KFQ6|A0A0B4KFQ6_DROME Protein kinase C OS=	7	2	2	69.556	606	6.1423	0	0	4.6	0	0	13024000
A1ZB68;Q8SYR1	tr|A1ZB68|A1ZB68_DROME FI01423p OS=Drosophila melanogaster GN=GstE3 PE=1 SV=1;tr|Q8SYR1|Q8SYR1_DROME RE40129p OS=Drosophila melanogaster GN=GstE3 PE=2 SV=1	2	2	2	24.947	220	2.4343	10	0	0	0	0	0
A2RVD2;Q9VF73	tr|A2RVD2|A2RVD2_DROME IP05677p OS=Drosophila melanogaster GN=CG6156 PE=2 SV=1;tr|Q9VF73|Q9VF73_DROME FI17904p1 OS=Drosophila melanogaster GN=anon-FF PE=2 SV=3	2	1	1	51.221	464	2.8465	0	2.6	0	0	0	0
A2RVD5;Q7K0Q2	tr|A2RVD5|A2RVD5_DROME IP06983p (Fragment) OS=Drosophila melanogaster GN=Ranbp11 PE=2 SV=1;tr|Q7K0Q2|Q7K0Q2_DROME LD41918p OS=Drosophila melanogaster GN=Impbeta11 PE=2 SV=1	2	1	1	64.865	563	1.9431	0	3	0	0	4858800	0
A4UZ58;Q8MS42;A1Z6Q0;A1Z6Q1;A0A0B4KEE4	tr|A4UZ58|A4UZ58_DROME Klaroid, isoform E OS=Drosophila melanogaster GN=koi PE=1 SV=1;tr|Q8MS42|Q8MS42_DROME RE12054p OS=Drosophila melanogaster GN=koi PE=2 SV=1;tr|A1Z6Q0|A1Z6Q0_DROME Klaroid, isoform D OS=Drosophila melanogaster GN=koi PE=1 SV=1;tr|A1Z6Q	5	2	2	42.173	365	28.696	0	3.8	8.2	0	5464700	14432000
A4UZZ4;Q9XTL9	tr|A4UZZ4|A4UZZ4_DROME Alpha-1,4 glucan phosphorylase OS=Drosophila melanogaster GN=GlyP PE=1 SV=1;sp|Q9XTL9|PYG_DROME Glycogen phosphorylase OS=Drosophila melanogaster GN=GlyP PE=2 SV=2	2	2	2	96.996	844	23.405	0	3.3	3.3	0	7017700	13039000
A4V4S5;M9PF72;Q9Y1I2	tr|A4V4S5|A4V4S5_DROME Carnation, isoform B OS=Drosophila melanogaster GN=car PE=1 SV=1;tr|M9PF72|M9PF72_DROME Carnation, isoform C OS=Drosophila melanogaster GN=car PE=1 SV=1;sp|Q9Y1I2|VP33A_DROME Vacuolar protein sorting-associated protein 33A OS=Drosoph	3	1	1	68.765	617	2.8411	0	0	3.9	0	0	4869400
A8E6M1;A1ZBB4;E1JGL8	tr|A8E6M1|A8E6M1_DROME GH01011p OS=Drosophila melanogaster GN=CG30122 PE=1 SV=1;tr|A1ZBB4|A1ZBB4_DROME Uncharacterized protein, isoform B OS=Drosophila melanogaster GN=CG30122 PE=1 SV=1;tr|E1JGL8|E1JGL8_DROME Uncharacterized protein, isoform C OS=Drosophil	3	16	1	140.44	1271	15.97	7.3	15.7	11.6	0	0	17069000
A8WHG2;A8JR82;E2QD55;A8JR81;E2QD56;E1JIT7	tr|A8WHG2|A8WHG2_DROME IP15395p OS=Drosophila melanogaster GN=CG31158 PE=2 SV=1;tr|A8JR82|A8JR82_DROME Exchange factor for Arf 6, isoform C OS=Drosophila melanogaster GN=Efa6 PE=1 SV=1;tr|E2QD55|E2QD55_DROME Exchange factor for Arf 6, isoform G OS=Drosophi	6	1	1	120.53	1062	2.4422	0	0	1.2	0	0	6234400
B3LF78;Q9NFU0	tr|B3LF78|B3LF78_DROME Fmr1, isoform F OS=Drosophila melanogaster GN=Fmr1 PE=1 SV=1;sp|Q9NFU0|FMR1_DROME Synaptic functional regulator FMR1 OS=Drosophila melanogaster GN=Fmr1 PE=1 SV=1	2	15	1	71.993	646	2.2341	20.6	18.1	27.1	0	0	0
B4F5J7;Q9V3R3	tr|B4F5J7|B4F5J7_DROME CG3704-PA (Fragment) OS=Drosophila melanogaster GN=CG3704 PE=4 SV=1;tr|Q9V3R3|Q9V3R3_DROME CG3704 OS=Drosophila melanogaster GN=EG:BACR7A4.17 PE=1 SV=1	2	1	1	34.914	312	3.5029	6.1	6.1	0	0	2417700	0
B4F5L6;Q9W328	tr|B4F5L6|B4F5L6_DROME CG3004-PA OS=Drosophila melanogaster GN=CG3004 PE=4 SV=1;sp|Q9W328|LST8_DROME Protein LST8 homolog OS=Drosophila melanogaster GN=Lst8 PE=1 SV=2	2	2	2	35.347	313	6.3008	6.1	3.8	9.9	0	7794200	33120000
B5RIG9;Q8SYG2	tr|B5RIG9|B5RIG9_DROME FI02069p (Fragment) OS=Drosophila melanogaster PE=2 SV=1;sp|Q8SYG2|CSN3_DROME COP9 signalosome complex subunit 3 OS=Drosophila melanogaster GN=CSN3 PE=2 SV=2	2	1	1	55.011	482	5.7232	0	0	3.1	0	0	22126000
B6IDL7;Q9VS46	tr|B6IDL7|B6IDL7_DROME FI03678p OS=Drosophila melanogaster GN=CG8605-RA PE=2 SV=1;sp|Q9VS46|RINT1_DROME RINT1-like protein OS=Drosophila melanogaster GN=Rint1 PE=2 SV=2	2	1	1	83.534	724	2.7071	0	1.7	0	0	4195300	0
B6UY77;B6UY69;B6UY62	tr|B6UY77|B6UY77_DROME Spindle D (Fragment) OS=Drosophila melanogaster GN=spn-D PE=4 SV=1;tr|B6UY69|B6UY69_DROME Spindle D (Fragment) OS=Drosophila melanogaster GN=spn-D PE=4 SV=1;tr|B6UY62|B6UY62_DROME Spindle D (Fragment) OS=Drosophila melanogaster GN=sp	3	1	1	24.314	212	-2	0	3.3	3.3	0	4678600	11102000
B6UYB4;B6UYB0;B6UYB7;B6UYB6;B6UYB5;B6UYB1;B6UYA7;B6UYA6;B6UYA5;B6UYA4;B6UYA3;B6UYA2;B6UYA1;B6UYA0;B6UY99;B6UY98;B6UY97;B6UY96;B6UY95;B6UY94;B6UY93;B6UY92;B6UY91;B6UY86;A0A0B4LGW1;Q9V877	tr|B6UYB4|B6UYB4_DROME Kinesin-like protein (Fragment) OS=Drosophila melanogaster GN=sub PE=3 SV=1;tr|B6UYB0|B6UYB0_DROME Kinesin-like protein (Fragment) OS=Drosophila melanogaster GN=sub PE=3 SV=1;tr|B6UYB7|B6UYB7_DROME Kinesin-like protein (Fragment) OS=	26	1	1	45.495	406	3.5663	0	0	3.7	0	0	16725000
B6V6Z8	tr|B6V6Z8|B6V6Z8_DROME Polyprotein OS=Drosophila melanogaster PE=4 SV=1	1	1	1	150.36	1319	-2	0	0	1.7	0	0	0
B7Z131;B7Z132;X2JIR4;M9PJ95;B7Z129;M9PGJ9;B7Z130;O77086	tr|B7Z131|B7Z131_DROME C3G guanyl-nucleotide exchange factor, isoform G OS=Drosophila melanogaster GN=C3G PE=4 SV=1;tr|B7Z132|B7Z132_DROME C3G guanyl-nucleotide exchange factor, isoform D OS=Drosophila melanogaster GN=C3G PE=4 SV=1;tr|X2JIR4|X2JIR4_DROME C	8	2	2	136.52	1234	2.6722	0	0.7	1.6	0	51898000	70832000
C1C3E7;G3JX31;G3JX29;G3JX30;G3JX27;G3JX28;A0A0B4KFR8;G3JX32;A0A0B4KER6;A0A0B4KEW3;A0A0B4LGL0;A0A126GUN6;A1ZA47;G3JX25;G3JX33	tr|C1C3E7|C1C3E7_DROME MIP09364p OS=Drosophila melanogaster GN=Zasp52 PE=1 SV=1;tr|G3JX31|G3JX31_DROME Z band alternatively spliced PDZ-motif protein 52, isoform O OS=Drosophila melanogaster GN=Zasp52 PE=1 SV=1;tr|G3JX29|G3JX29_DROME Z band alternatively s	15	2	2	48.795	449	4.8022	0	0	5.1	0	0	38484000
C1C3G8	tr|C1C3G8|C1C3G8_DROME MICOS complex subunit MIC13 (Fragment) OS=Drosophila melanogaster GN=CG15296-RA PE=2 SV=1	1	1	1	20.496	182	-2	0	0	11.5	0	0	0
C4IY21;Q9V9M8;Q8SZU4;B7YZY7	tr|C4IY21|C4IY21_DROME GM14140p (Fragment) OS=Drosophila melanogaster GN=CG3262-RD PE=2 SV=1;tr|Q9V9M8|Q9V9M8_DROME CG3262, isoform D OS=Drosophila melanogaster GN=Dmel\CG3262 PE=1 SV=3;tr|Q8SZU4|Q8SZU4_DROME CG3262, isoform F OS=Drosophila melanogaster GN	4	3	3	29.055	267	4.4659	0	10.1	6.4	0	9270600	10304000
C4JC86;A0A0B4LHU8;A8MPH9;P21525	tr|C4JC86|C4JC86_DROME LD16083p OS=Drosophila melanogaster GN=kay-RA PE=2 SV=1;tr|A0A0B4LHU8|A0A0B4LHU8_DROME Kayak, isoform G OS=Drosophila melanogaster GN=kay PE=1 SV=1;sp|A8MPH9|FOSLD_DROME Transcription factor kayak, isoforms D/sro OS=Drosophila melano	4	2	2	62.811	595	6.8577	0	3	4.9	0	2851500	0
C6TP81;A4V392;Q9VCY8	tr|C6TP81|C6TP81_DROME IP14059p OS=Drosophila melanogaster GN=CG5315-RB PE=2 SV=1;tr|A4V392|A4V392_DROME Adiponectin receptor, isoform C OS=Drosophila melanogaster GN=AdipoR PE=1 SV=1;sp|Q9VCY8|ADRL_DROME Adiponectin receptor protein OS=Drosophila melanoga	3	1	1	41.189	362	2.2584	0	7.2	0	0	7051200	0
C7LAH3;A0A0B4K6N7;Q9VE34	tr|C7LAH3|C7LAH3_DROME MIP08945p (Fragment) OS=Drosophila melanogaster GN=CG14299-RC PE=2 SV=1;tr|A0A0B4K6N7|A0A0B4K6N7_DROME Ectopic P-granules autophagy protein 5, isoform D OS=Drosophila melanogaster GN=Epg5 PE=1 SV=1;sp|Q9VE34|EPG5_DROME Ectopic P gran	3	1	1	38.985	340	-2	0	0	3.5	0	0	9856700
C8VUZ0;C8VUY9;A0A0B4LEY5;Q960L7;A1Z7T2;A0A0B4K6U3;A0A0B4K727;A0A0B4LF03;A0A0B4LEI8;E1JH15;A0A0B4JD07;A1Z7T1;A1Z7T3;A0A0B4LFX2;A8DY76;A1Z7T0	tr|C8VUZ0|C8VUZ0_DROME RH06256p OS=Drosophila melanogaster GN=Pkn-RF PE=2 SV=1;tr|C8VUY9|C8VUY9_DROME RH10094p OS=Drosophila melanogaster GN=Pkn-RF PE=2 SV=1;tr|A0A0B4LEY5|A0A0B4LEY5_DROME Protein kinase N, isoform O OS=Drosophila melanogaster GN=Pkn PE=1	16	1	1	91.483	823	2.1735	0	0	1.5	0	0	7947100
D2NUE8;Q8IQ96;Q5U192;Q9U7D8;Q58CL4;A8JNN0;Q8IQ95;Q8IQ97	tr|D2NUE8|D2NUE8_DROME MIP14634p OS=Drosophila melanogaster GN=pbl PE=2 SV=1;tr|Q8IQ96|Q8IQ96_DROME Pebble, isoform C OS=Drosophila melanogaster GN=pbl PE=4 SV=1;tr|Q5U192|Q5U192_DROME RE42782p OS=Drosophila melanogaster PE=2 SV=1;tr|Q9U7D8|Q9U7D8_DROME FI	8	1	1	64.149	567	7.2957	0	0	2.3	0	0	0
D5A7P5	tr|D5A7P5|D5A7P5_DROME MIP20116p OS=Drosophila melanogaster PE=2 SV=1	1	1	1	5.6797	50	-2	0	0	38	0	0	0
D7F9N8	tr|D7F9N8|D7F9N8_DROME Odorant receptor 98a (Fragment) OS=Drosophila melanogaster GN=or98a PE=4 SV=1	1	1	1	34.382	301	2.4466	0	4	4	0	6980800	10715000
E0R929	tr|E0R929|E0R929_DROME MIP25033p OS=Drosophila melanogaster GN=CG14218-RA PE=2 SV=1	1	1	1	37.68	343	-2	0	4.1	0	0	0	0
E1JHQ1;P20477	tr|E1JHQ1|E1JHQ1_DROME Glutamine synthetase OS=Drosophila melanogaster GN=Gs1 PE=1 SV=1;sp|P20477|GLNA1_DROME Glutamine synthetase 1, mitochondrial OS=Drosophila melanogaster GN=Gs1 PE=2 SV=3	2	2	2	44.395	399	8.6684	0	0	7.5	0	0	33950000
E1JHX5;Q7K0L4	tr|E1JHX5|E1JHX5_DROME CG7611, isoform B OS=Drosophila melanogaster GN=WDR26 PE=1 SV=1;sp|Q7K0L4|WDR26_DROME WD repeat-containing protein 26 homolog OS=Drosophila melanogaster GN=CG7611 PE=1 SV=1	2	2	2	69.616	630	3.4176	0	0	3.2	0	0	21064000
E1JI22;Q9VWA1	tr|E1JI22|E1JI22_DROME Clathrin light chain OS=Drosophila melanogaster GN=Clc PE=1 SV=1;sp|Q9VWA1|CLC_DROME Clathrin light chain OS=Drosophila melanogaster GN=Clc PE=2 SV=1	2	1	1	23.84	219	3.4898	8.2	0	8.2	0	0	0
E1NZD5;F0JAL2;E1NZD6;E3CTP8;A0A0B4KES0;P24014;E1NZA8	tr|E1NZD5|E1NZD5_DROME RT09975p (Fragment) OS=Drosophila melanogaster GN=sli-RA PE=2 SV=1;tr|F0JAL2|F0JAL2_DROME RT11125p (Fragment) OS=Drosophila melanogaster GN=sli-RE PE=2 SV=1;tr|E1NZD6|E1NZD6_DROME RT09980p (Fragment) OS=Drosophila melanogaster GN=sli	7	5	5	161.82	1444	11.6	0	5.9	2.7	0	48190000	31055000
E2QD64;Q7K4H4	tr|E2QD64|E2QD64_DROME CG2982, isoform B OS=Drosophila melanogaster GN=anon-4Bd PE=1 SV=1;sp|Q7K4H4|NO66_DROME Bifunctional lysine-specific demethylase and histidyl-hydroxylase NO66 OS=Drosophila melanogaster GN=CG2982 PE=1 SV=1	2	2	2	73.097	653	3.6728	0	3.4	0	0	6568400	0
E3CTU3;Q9VS84;Q86P15	tr|E3CTU3|E3CTU3_DROME RT10325p (Fragment) OS=Drosophila melanogaster GN=CG32372-RA PE=2 SV=1;tr|Q9VS84|Q9VS84_DROME FI03225p OS=Drosophila melanogaster GN=ltl PE=1 SV=2;tr|Q86P15|Q86P15_DROME RE09158p OS=Drosophila melanogaster GN=ltl PE=2 SV=1	3	1	1	89.458	805	-2	0	2	2	0	15654000	20887000
E8NH53	tr|E8NH53|E8NH53_DROME GM01162p OS=Drosophila melanogaster GN=CG2126-RA PE=2 SV=1	1	1	1	12.683	109	-2	0	13.8	13.8	0	8439500	10438000
F0JAG9;A0A0B4LF25;A0A0B4LFA9;A0A0B4K7Z0;A1Z9K8	tr|F0JAG9|F0JAG9_DROME LP20407p (Fragment) OS=Drosophila melanogaster GN=Prosap-RB PE=2 SV=1;tr|A0A0B4LF25|A0A0B4LF25_DROME Prosap, isoform E OS=Drosophila melanogaster GN=Prosap PE=4 SV=1;tr|A0A0B4LFA9|A0A0B4LFA9_DROME Prosap, isoform C OS=Drosophila mela	5	1	1	163.69	1547	4.4093	0	0	1.5	0	0	17382000
F0JAI1;Q9VH48	tr|F0JAI1|F0JAI1_DROME Arginine methyltransferase 4, isoform B OS=Drosophila melanogaster GN=Art4 PE=1 SV=1;sp|Q9VH48|CARM1_DROME Probable histone-arginine methyltransferase CARMER OS=Drosophila melanogaster GN=Art4 PE=1 SV=1	2	4	4	59.727	530	10.313	0	4.3	10	0	13643000	55954000
F0JAQ0	tr|F0JAQ0|F0JAQ0_DROME MIP05809p (Fragment) OS=Drosophila melanogaster GN=CG6704-RA PE=2 SV=1	1	1	1	41.837	356	-2	0	0	4.8	0	0	0
F2FB68;E6PBW7;Q9VZI0;Q9I7T2;Q8IRC0;M9PEK8;M9PBN6;Q8IRB9;M9PE93;M9PHB1;A8JNK1;Q8IRC1	tr|F2FB68|F2FB68_DROME Ensconsin, isoform H OS=Drosophila melanogaster GN=ens PE=1 SV=1;tr|E6PBW7|E6PBW7_DROME LD26877p (Fragment) OS=Drosophila melanogaster GN=ens-RA PE=2 SV=1;tr|Q9VZI0|Q9VZI0_DROME Ensconsin, isoform B OS=Drosophila melanogaster GN=ens	12	3	3	93.786	848	28.209	0	1.7	6.5	0	63035000	33215000
F6J689;F6J686;F6J684;Q9VYL5	tr|F6J689|F6J689_DROME CG1824 (Fragment) OS=Drosophila melanogaster GN=CG1824 PE=4 SV=1;tr|F6J686|F6J686_DROME CG1824 (Fragment) OS=Drosophila melanogaster GN=CG1824 PE=4 SV=1;tr|F6J684|F6J684_DROME CG1824 (Fragment) OS=Drosophila melanogaster GN=CG1824 PE	4	1	1	23.254	209	3.5704	0	11	11	0	3952900	7275500
H0RND2;E4NKP0;E1JI85;E1JI84;Q8IQC1	tr|H0RND2|H0RND2_DROME Golgi apparatus membrane protein TVP23 homolog OS=Drosophila melanogaster GN=CG5021-RB PE=2 SV=1;tr|E4NKP0|E4NKP0_DROME Golgi apparatus membrane protein TVP23 homolog OS=Drosophila melanogaster GN=CG5021-RB PE=2 SV=1;tr|E1JI85|E1JI85	5	1	1	24.563	215	2.4553	0	5.1	0	0	8630100	0
H5V8G4;A0A0B4KI70;Q9V9V7	tr|H5V8G4|H5V8G4_DROME MIP34321p1 (Fragment) OS=Drosophila melanogaster GN=pasha-RA PE=2 SV=1;tr|A0A0B4KI70|A0A0B4KI70_DROME Partner of drosha, isoform B OS=Drosophila melanogaster GN=pasha PE=4 SV=1;tr|Q9V9V7|Q9V9V7_DROME LD23072p OS=Drosophila melanogast	3	1	1	62.042	553	2.8503	0	0	3.4	0	0	0
H6QXJ3	tr|H6QXJ3|H6QXJ3_DROME Suppressor 2 of zeste 4-31 OS=Drosophila melanogaster GN=Su(z)2-4-34 PE=4 SV=1	1	1	1	27.384	237	1.9503	0	3.8	3.8	0	534140000	344450000
K7ZI00;M9PIS3;A0A0F6T1J9;P41572	tr|K7ZI00|K7ZI00_DROME 6-phosphogluconate dehydrogenase (Fragment) OS=Drosophila melanogaster GN=PGD PE=4 SV=1;tr|M9PIS3|M9PIS3_DROME 6-phosphogluconate dehydrogenase, decarboxylating OS=Drosophila melanogaster GN=Pgd PE=3 SV=1;tr|A0A0F6T1J9|A0A0F6T1J9_DRO	4	1	1	28.914	258	2.8565	0	0	7.8	0	0	9237600
M9MS45;B7Z098;Q9VNX8	tr|M9MS45|M9MS45_DROME Eukaryotic translation initiation factor 2A OS=Drosophila melanogaster GN=anon-WO0118547.243 PE=1 SV=1;tr|B7Z098|B7Z098_DROME Eukaryotic translation initiation factor 2A OS=Drosophila melanogaster GN=anon-WO0118547.243 PE=1 SV=2;sp|Q	3	1	1	61.327	555	4.3281	0	2.5	2.5	0	1871900	5147600
M9NCT3;Q9VKL9;Q8IGW4;B5RJK8;M9NEE5;Q8IPB2	tr|M9NCT3|M9NCT3_DROME Uncharacterized protein, isoform K OS=Drosophila melanogaster GN=BEST:LD13681 PE=4 SV=1;tr|Q9VKL9|Q9VKL9_DROME Uncharacterized protein, isoform E OS=Drosophila melanogaster GN=BEST:LD13681 PE=4 SV=2;tr|Q8IGW4|Q8IGW4_DROME RE12363p OS	6	2	2	95.177	827	2.5258	0	1.3	1.2	0	1533100	7139100
M9NDW1;M9PGJ0;M9PDH5;M9PBG6;Q9W0S9;Q8MRM9	tr|M9NDW1|M9NDW1_DROME DISCO interacting protein 2, isoform B OS=Drosophila melanogaster GN=DIP2 PE=4 SV=1;tr|M9PGJ0|M9PGJ0_DROME DISCO interacting protein 2, isoform C OS=Drosophila melanogaster GN=DIP2 PE=4 SV=1;tr|M9PDH5|M9PDH5_DROME DISCO interacting p	6	2	2	192.47	1755	3.4164	0	0	1	0	0	16058000
M9NE73;Q9VT65	tr|M9NE73|M9NE73_DROME Calpain-B, isoform B OS=Drosophila melanogaster GN=CalpB PE=3 SV=1;sp|Q9VT65|CANB_DROME Calpain-B OS=Drosophila melanogaster GN=CalpB PE=1 SV=2	2	2	1	103.81	925	6.0843	1.1	1.1	2.7	0	0	12239000
M9NE89;P08928	tr|M9NE89|M9NE89_DROME Lamin, isoform B OS=Drosophila melanogaster GN=Lam PE=3 SV=1;sp|P08928|LAM0_DROME Lamin Dm0 OS=Drosophila melanogaster GN=Lam PE=1 SV=4	2	8	8	71.299	622	41.456	0	7.4	21.1	0	22299000	130680000
M9NED4;M9NF18;Q9VYW5	tr|M9NED4|M9NED4_DROME CG2247, isoform C OS=Drosophila melanogaster GN=Dmel\CG2247 PE=1 SV=1;tr|M9NF18|M9NF18_DROME CG2247, isoform D OS=Drosophila melanogaster GN=Dmel\CG2247 PE=1 SV=1;tr|Q9VYW5|Q9VYW5_DROME CG2247, isoform A OS=Drosophila melanogaster GN	3	3	3	104.58	944	3.5738	0	1	3.5	0	2468900	56669000
M9PBM3;Q9VPW2	tr|M9PBM3|M9PBM3_DROME Cysteine protease OS=Drosophila melanogaster GN=Atg4a PE=1 SV=1;tr|Q9VPW2|Q9VPW2_DROME Cysteine protease OS=Drosophila melanogaster GN=Atg4a PE=1 SV=1	2	1	1	45.516	410	3.9709	0	0	3.7	0	0	3864300
M9PCM4;P29052	tr|M9PCM4|M9PCM4_DROME Transcription factor IIB, isoform B OS=Drosophila melanogaster GN=TfIIB PE=4 SV=1;sp|P29052|TF2B_DROME Transcription initiation factor IIB OS=Drosophila melanogaster GN=TfIIB PE=2 SV=1	2	1	1	34.369	315	19.887	10.8	0	10.8	0	0	20185000
M9PCU1;M9PI83;M9PFX0;M9PFI5;X2JGR4;A8JNU2;M9PFI8;M9PCT8;M9PFS1;P00522	tr|M9PCU1|M9PCU1_DROME Abl tyrosine kinase, isoform H OS=Drosophila melanogaster GN=Abl PE=1 SV=1;tr|M9PI83|M9PI83_DROME Abl tyrosine kinase, isoform G OS=Drosophila melanogaster GN=Abl PE=1 SV=1;tr|M9PFX0|M9PFX0_DROME Abl tyrosine kinase, isoform E OS=Dro	10	1	1	159.58	1504	2.2172	0	0	0.7	0	0	14217000
M9PD95;C1C5B1;Q03017	tr|M9PD95|M9PD95_DROME Cactus, isoform E OS=Drosophila melanogaster GN=cact PE=1 SV=1;tr|C1C5B1|C1C5B1_DROME RE25277p OS=Drosophila melanogaster GN=cact-RB PE=2 SV=1;sp|Q03017|CACT_DROME NF-kappa-B inhibitor cactus OS=Drosophila melanogaster GN=cact PE=1 S	3	1	1	53.818	500	1.9602	0	0	3.4	0	0	8168200
M9PDE2;Q9U3V5	tr|M9PDE2|M9PDE2_DROME Tiptop, isoform B OS=Drosophila melanogaster GN=tio PE=4 SV=1;sp|Q9U3V5|TIPT_DROME Protein tiptop OS=Drosophila melanogaster GN=tio PE=2 SV=2	2	1	1	108.36	1024	-2	1.3	0	0	0	0	0
M9PDV6;M9PE32	tr|M9PDV6|M9PDV6_DROME Fife, isoform B OS=Drosophila melanogaster GN=Fife PE=1 SV=1;tr|M9PE32|M9PE32_DROME Fife, isoform D OS=Drosophila melanogaster GN=Fife PE=1 SV=1	2	1	1	104.77	969	-2	1.8	0	0	0	0	0
M9PEN1;Q9VSY4	tr|M9PEN1|M9PEN1_DROME Alpha-tubulin N-acetyltransferase OS=Drosophila melanogaster GN=Dmel\CG3967 PE=3 SV=1;sp|Q9VSY4|ATAT1_DROME Alpha-tubulin N-acetyltransferase 1 OS=Drosophila melanogaster GN=CG3967 PE=2 SV=2	2	1	1	32.015	291	2.3123	0	0	4.5	0	0	4024900
M9PG55;Q9VJ42;B7YZX6	tr|M9PG55|M9PG55_DROME Uncharacterized protein, isoform C OS=Drosophila melanogaster GN=Dmel\CG10600 PE=1 SV=1;tr|Q9VJ42|Q9VJ42_DROME Uncharacterized protein, isoform A OS=Drosophila melanogaster GN=Dmel\CG10600 PE=1 SV=3;tr|B7YZX6|B7YZX6_DROME Uncharacter	3	3	3	150.42	1376	5.7307	0	2.8	0.7	0	4764200	4488100
M9PG87;Q9VPA1	tr|M9PG87|M9PG87_DROME Uncharacterized protein, isoform B OS=Drosophila melanogaster GN=Dmel\CG32432 PE=4 SV=1;tr|Q9VPA1|Q9VPA1_DROME GH12701p OS=Drosophila melanogaster GN=FBgn0037032 PE=2 SV=2	2	1	1	144.91	1297	-2	0	0.7	0.7	0	6987900	8099400
M9PGG4;P18824	tr|M9PGG4|M9PGG4_DROME Armadillo, isoform F OS=Drosophila melanogaster GN=arm PE=4 SV=1;sp|P18824|ARM_DROME Armadillo segment polarity protein OS=Drosophila melanogaster GN=arm PE=1 SV=1	2	1	1	91.152	843	2.2747	0	0	1.2	0	0	0
M9PHN8;X2JF40;Q27580	tr|M9PHN8|M9PHN8_DROME Adenosylhomocysteinase OS=Drosophila melanogaster GN=Ahcy PE=3 SV=1;tr|X2JF40|X2JF40_DROME Adenosylhomocysteinase OS=Drosophila melanogaster GN=Ahcy PE=3 SV=1;sp|Q27580|SAHH_DROME Adenosylhomocysteinase OS=Drosophila melanogaster GN=	3	1	1	35.592	323	2.7194	0	0	4.6	0	0	0
M9PHZ8;Q8MPN9;Q9VTB5;Q8MPP0	tr|M9PHZ8|M9PHZ8_DROME Ninjurin A, isoform D OS=Drosophila melanogaster GN=NijA PE=4 SV=1;tr|Q8MPN9|Q8MPN9_DROME Ninjurin A beta OS=Drosophila melanogaster GN=NijA PE=2 SV=1;tr|Q9VTB5|Q9VTB5_DROME Ninjurin A gamma OS=Drosophila melanogaster GN=NijA PE=2 SV	4	1	1	24.161	225	-2	5.8	0	0	0	0	0
M9ZYW3;D9PTS4;P40417	tr|M9ZYW3|M9ZYW3_DROME Mitogen-activated protein kinase OS=Drosophila melanogaster GN=rl-RE PE=2 SV=2;tr|D9PTS4|D9PTS4_DROME Mitogen-activated protein kinase (Fragment) OS=Drosophila melanogaster GN=rl-RB PE=2 SV=1;sp|P40417|ERKA_DROME Mitogen-activated pr	3	3	3	46.806	407	11.111	0	7.1	14.7	0	5482800	28617000
M9ZYW5;M9MSC9;M9MSA2;Q9VY77	tr|M9ZYW5|M9ZYW5_DROME RE30166p1 OS=Drosophila melanogaster GN=jub-RC PE=2 SV=1;tr|M9MSC9|M9MSC9_DROME Ajuba LIM protein, isoform C OS=Drosophila melanogaster GN=jub PE=4 SV=1;tr|M9MSA2|M9MSA2_DROME Ajuba LIM protein, isoform D OS=Drosophila melanogaster G	4	2	2	76.905	718	7.7058	0	0	3.9	0	0	35382000
N0BKF4;Q9VQF9	tr|N0BKF4|N0BKF4_DROME SNAPIN protein homolog OS=Drosophila melanogaster GN=snapin-RA PE=2 SV=1;sp|Q9VQF9|SNAPN_DROME SNAPIN protein homolog OS=Drosophila melanogaster GN=Snapin PE=1 SV=1	2	1	1	15.056	134	3.2962	0	0	12.7	0	0	8306100
O18356;O18353;Q7KVG9	tr|O18356|O18356_DROME Short form of CHIP OS=Drosophila melanogaster GN=Chip PE=4 SV=1;tr|O18353|O18353_DROME CHIP OS=Drosophila melanogaster GN=Chi PE=1 SV=1;tr|Q7KVG9|Q7KVG9_DROME Chip, isoform B OS=Drosophila melanogaster GN=Chi PE=2 SV=1	3	1	1	39.437	365	3.4692	0	0	4.1	0	0	0
O77267;Q9W531	tr|O77267|O77267_DROME EG:22E5.7 protein OS=Drosophila melanogaster GN=EG:22E5.7 PE=4 SV=1;tr|Q9W531|Q9W531_DROME CG4281 OS=Drosophila melanogaster GN=EG:22E5.7 PE=2 SV=1	2	1	1	66.259	592	2.3392	0	0	4.6	0	0	0
O77477	tr|O77477|O77477_DROME CG4882, isoform A OS=Drosophila melanogaster GN=CG4882 PE=1 SV=1	1	1	1	45.707	406	17.392	0	0	7.4	0	0	6700200
O97066;Q3YMT4	tr|O97066|O97066_DROME Signal peptidase complex catalytic subunit SEC11 OS=Drosophila melanogaster GN=twr PE=1 SV=1;tr|Q3YMT4|Q3YMT4_DROME Signal peptidase complex catalytic subunit SEC11 (Fragment) OS=Drosophila melanogaster GN=twr PE=2 SV=1	2	1	1	20.98	185	4.0979	0	8.1	0	0	15294000	0
P02299	sp|P02299|H3_DROME Histone H3 OS=Drosophila melanogaster GN=His3 PE=1 SV=4	1	5	1	15.388	136	11.376	16.9	43.4	16.9	0	8387500	0
P22769	sp|P22769|PSA71_DROME Proteasome subunit alpha type-7-1 OS=Drosophila melanogaster GN=Prosalpha4 PE=1 SV=2	1	1	1	27.973	249	8.7375	8.8	8.8	0	0	14231000	0
P25167	sp|P25167|RPC2_DROME DNA-directed RNA polymerase III subunit RPC2 OS=Drosophila melanogaster GN=RpIII128 PE=2 SV=2	1	1	1	128.51	1137	3.3139	0	1.4	0	0	4343200	0
P26802	sp|P26802|DDX51_DROME Probable ATP-dependent RNA helicase Dbp73D OS=Drosophila melanogaster GN=Dbp73D PE=2 SV=3	1	2	2	77.589	687	4.9432	0	0	4.5	0	0	5950900
P28166	sp|P28166|ZFH1_DROME Zinc finger protein 1 OS=Drosophila melanogaster GN=zfh1 PE=1 SV=2	1	1	1	116.6	1054	2.8348	0	0	1.1	0	0	0
P35421	sp|P35421|PUR4_DROME Phosphoribosylformylglycinamidine synthase OS=Drosophila melanogaster GN=ade2 PE=2 SV=2	1	7	7	148.08	1354	23.519	0	0	8.3	0	0	119180000
P40301	sp|P40301|PSA2_DROME Proteasome subunit alpha type-2 OS=Drosophila melanogaster GN=Prosalpha2 PE=1 SV=1	1	2	2	25.906	234	8.6508	0	0	13.7	0	0	40124000
P91639;Q9VKH3;Q5U0U8;Q5U0U1	tr|P91639|P91639_DROME Spalt-related protein OS=Drosophila melanogaster GN=salr PE=4 SV=1;tr|Q9VKH3|Q9VKH3_DROME FI23031p1 OS=Drosophila melanogaster GN=salr PE=2 SV=1;tr|Q5U0U8|Q5U0U8_DROME AT24316p OS=Drosophila melanogaster GN=salr PE=2 SV=1;tr|Q5U0U1|Q	4	1	1	138.99	1263	-2	0	0.6	0.6	0	19798000	33640000
P92030;Q9W1K4;Q7YU43	tr|P92030|P92030_DROME Egalitarian OS=Drosophila melanogaster GN=egl PE=2 SV=2;tr|Q9W1K4|Q9W1K4_DROME Egalitarian, isoform B OS=Drosophila melanogaster GN=egl PE=1 SV=4;tr|Q7YU43|Q7YU43_DROME RE33408p OS=Drosophila melanogaster GN=egl PE=2 SV=1	3	3	3	110.71	993	5.3028	0	0	3.6	0	0	30128000
Q1EC00;M9PAY6;M9PDS0;Q9VPM7	tr|Q1EC00|Q1EC00_DROME IP13429p (Fragment) OS=Drosophila melanogaster GN=CG17078 PE=2 SV=1;tr|M9PAY6|M9PAY6_DROME Uncharacterized protein, isoform D OS=Drosophila melanogaster GN=anon-21Cb PE=1 SV=1;tr|M9PDS0|M9PDS0_DROME Uncharacterized protein, isoform C	4	2	2	64.28	577	2.4521	0	3.6	2.3	0	8763900	3608600
Q1WWC8;Q9NCL3;M9PJN0;Q8IR54;M9NGE4;M9NEG4;Q9VY43;Q9NCW7;Q1KN24;M9PEK6;Q8IR55	tr|Q1WWC8|Q1WWC8_DROME IP14842p (Fragment) OS=Drosophila melanogaster GN=mud PE=2 SV=1;tr|Q9NCL3|Q9NCL3_DROME Mud protein OS=Drosophila melanogaster GN=mud PE=2 SV=2;tr|M9PJN0|M9PJN0_DROME Mushroom body defect, isoform K OS=Drosophila melanogaster GN=mud P	11	1	1	64.7	563	-2	0	1.4	0	0	0	0
Q27IU4;Q27IU9;Q27IU8;Q27IU7;Q27IU6;Q27IU5;Q27IU3;Q27IU2;Q9VCU9	tr|Q27IU4|Q27IU4_DROME Dicer-1 (Fragment) OS=Drosophila melanogaster GN=Dcr-1 PE=4 SV=1;tr|Q27IU9|Q27IU9_DROME Dicer-1 (Fragment) OS=Drosophila melanogaster GN=Dcr-1 PE=4 SV=1;tr|Q27IU8|Q27IU8_DROME Dicer-1 (Fragment) OS=Drosophila melanogaster GN=Dcr-1 PE	9	3	3	231.16	2043	8.3109	0.7	0	1.9	0	0	19378000
Q2EJP2;Q2EJI9;B9UYC2;Q2EJQ0;Q2EJN2;Q2EJG6;Q2EJD4;Q2EJS1;Q2EJR7;Q2EJR6;Q2EJR5;Q2EJR3;Q2EJR1;Q2EJR0;Q2EJQ9;Q2EJQ8;Q2EJQ7;Q2EJQ6;Q2EJQ4;Q2EJQ2;Q2EJP5;Q2EJP0;Q2EJN0;Q2EJM6;Q2EJM5;Q2EJM1;Q2EJM0;Q2EJL9;Q2EJL5;Q2EJL0;Q2EJK9;Q2EJK8;Q2EJJ7;Q2EJH2;Q2EJF5;Q2EJF3;Q2EJF2;Q2EJE9;Q2EJE6;Q2EJE2;Q2EJD8;Q2EJD6;Q2EJD1;Q2EJC0;Q2EJB7;Q2EJB6;Q2EJA5;B9UYE3;B9UYE2;B9UYC5;B9UYC1;B9UYA8;B9UYA7;Q9V3A4	tr|Q2EJP2|Q2EJP2_DROME Catsup protein OS=Drosophila melanogaster GN=Catsup PE=4 SV=1;tr|Q2EJI9|Q2EJI9_DROME Catsup protein OS=Drosophila melanogaster GN=Catsup PE=4 SV=1;tr|B9UYC2|B9UYC2_DROME Catsup protein OS=Drosophila melanogaster GN=Catsup PE=4 SV=1;t	54	1	1	46.402	430	2.0993	0	2.3	2.3	0	3679600	8044500
Q2XXT6;Q9VZX7;Q95TX2	tr|Q2XXT6|Q2XXT6_DROME CG1241 (Fragment) OS=Drosophila melanogaster GN=Atg2 PE=4 SV=1;tr|Q9VZX7|Q9VZX7_DROME Autophagy-related 2, isoform A OS=Drosophila melanogaster GN=Atg2 PE=2 SV=1;tr|Q95TX2|Q95TX2_DROME GH26553p OS=Drosophila melanogaster GN=Atg2 PE=2	3	2	2	210.98	1873	3.4577	0	0	1.4	0	0	14891000
Q3KN57;Q0E8J0;Q8T078	tr|Q3KN57|Q3KN57_DROME RE60032p2 OS=Drosophila melanogaster GN=CG42245-RA PE=2 SV=1;tr|Q0E8J0|Q0E8J0_DROME MEP-1, isoform A OS=Drosophila melanogaster GN=MEP-1 PE=1 SV=1;tr|Q8T078|Q8T078_DROME LD22412p OS=Drosophila melanogaster GN=MEP-1 PE=2 SV=1	3	3	3	124.07	1152	37.366	0	4.6	5.9	0	20936000	54285000
Q4QQC4;Q0KIB3	tr|Q4QQC4|Q4QQC4_DROME Histone acetyltransferase type B catalytic subunit OS=Drosophila melanogaster PE=2 SV=1;tr|Q0KIB3|Q0KIB3_DROME Histone acetyltransferase type B catalytic subunit OS=Drosophila melanogaster GN=Hat1 PE=1 SV=1	2	3	3	47.976	405	28.82	3.2	10.4	10.4	0	20941000	34524000
Q4V4B0;Q4V4D4	tr|Q4V4B0|Q4V4B0_DROME IP03772p OS=Drosophila melanogaster PE=2 SV=1;tr|Q4V4D4|Q4V4D4_DROME IP03672p OS=Drosophila melanogaster PE=2 SV=1	2	1	1	6.3083	56	-2	0	0	19.6	0	0	11463000
Q4V5H1	tr|Q4V5H1|Q4V5H1_DROME Peptidyl-prolyl cis-trans isomerase OS=Drosophila melanogaster GN=CG17266 PE=1 SV=1	1	1	1	20.182	183	15.347	0	0	10.9	0	0	11026000
Q4V5N2;Q4V5V4;A0A0C4DHG1;Q9VNE3	tr|Q4V5N2|Q4V5N2_DROME O-phosphoseryl-tRNA(Sec) selenium transferase OS=Drosophila melanogaster GN=CG1427 PE=2 SV=1;tr|Q4V5V4|Q4V5V4_DROME IP11878p (Fragment) OS=Drosophila melanogaster GN=CG1427 PE=2 SV=1;tr|A0A0C4DHG1|A0A0C4DHG1_DROME O-phosphoseryl-tRNA	4	1	1	46.544	422	2.5386	0	2.6	0	0	1710200	0
Q4V654;Q4V5R8;Q4V5Y6	tr|Q4V654|Q4V654_DROME IP11730p OS=Drosophila melanogaster GN=CG12014 PE=2 SV=1;tr|Q4V5R8|Q4V5R8_DROME IP11930p OS=Drosophila melanogaster GN=CG12014 PE=2 SV=1;tr|Q4V5Y6|Q4V5Y6_DROME IP11830p (Fragment) OS=Drosophila melanogaster GN=CG12014 PE=2 SV=1	3	1	1	41.385	359	4.9897	0	0	5.3	0	0	0
Q59DZ3;Q7YU78;A8DZ03;A8DZ02;Q9VJW9;Q94902	tr|Q59DZ3|Q59DZ3_DROME FI21209p1 OS=Drosophila melanogaster GN=kuz PE=1 SV=1;tr|Q7YU78|Q7YU78_DROME SD03071p OS=Drosophila melanogaster GN=kuz PE=2 SV=1;tr|A8DZ03|A8DZ03_DROME Kuzbanian, isoform G OS=Drosophila melanogaster GN=kuz PE=1 SV=2;tr|A8DZ02|A8DZ0	6	1	1	121.16	1090	3.1935	0	0	1.1	0	0	11592000
Q5BI37;Q9Y0W1;Q9V9T4;Q9NG24	tr|Q5BI37|Q5BI37_DROME LD32807p (Fragment) OS=Drosophila melanogaster GN=Acf PE=2 SV=1;tr|Q9Y0W1|Q9Y0W1_DROME ATP-dependent chromatin assembly factor large subunit OS=Drosophila melanogaster GN=Acf PE=2 SV=1;tr|Q9V9T4|Q9V9T4_DROME ATP-dependent chromatin a	4	1	1	132.92	1151	3.107	0	0	1	0	0	4288900
Q6NP22;Q3ZAN3;A1Z843;B9EQR0	tr|Q6NP22|Q6NP22_DROME LD47325p (Fragment) OS=Drosophila melanogaster GN=CG1371 PE=2 SV=1;tr|Q3ZAN3|Q3ZAN3_DROME LD18215p OS=Drosophila melanogaster GN=CG1371 PE=2 SV=1;tr|A1Z843|A1Z843_DROME CG1371 OS=Drosophila melanogaster GN=CG1371 PE=1 SV=1;tr|B9EQR0|	4	3	3	129.82	1190	7.3395	0	3.8	3.8	0	19688000	34146000
Q6NP69;Q8INS9	tr|Q6NP69|Q6NP69_DROME GST-containing FLYWCH zinc-finger protein OS=Drosophila melanogaster GN=gfzf PE=1 SV=1	2	3	3	119.28	1045	7.3127	0	0	4.2	0	0	9436400
Q6NPB3;Q7K209	tr|Q6NPB3|Q6NPB3_DROME SD14515p OS=Drosophila melanogaster GN=CG8525 PE=2 SV=1;tr|Q7K209|Q7K209_DROME CG8525, isoform A OS=Drosophila melanogaster GN=CG8525 PE=1 SV=1	2	1	1	32.138	290	2.0748	0	0	4.1	0	0	14694000
Q709R6	sp|Q709R6|BOCKS_DROME LEM domain-containing protein Bocksbeutel OS=Drosophila melanogaster GN=bocks PE=1 SV=1	1	1	1	44.203	399	2.2686	0	0	3.5	0	0	8817300
Q7JQN4;Q7KK34	tr|Q7JQN4|Q7JQN4_DROME LD15481p OS=Drosophila melanogaster GN=Rs1 PE=1 SV=1;tr|Q7KK34|Q7KK34_DROME BcDNA.GM05306 (Fragment) OS=Drosophila melanogaster GN=Rs1 PE=2 SV=1	2	3	3	87.839	782	8.0472	0	6.6	1.5	0	20447000	16072000
Q7JQT9	tr|Q7JQT9|Q7JQT9_DROME CG1671 OS=Drosophila melanogaster GN=CG1671 PE=1 SV=1	1	4	4	88.536	787	9.6833	0	5.7	5.7	0	44010000	40669000
Q7JR49	tr|Q7JR49|Q7JR49_DROME LD09158p OS=Drosophila melanogaster GN=VhaAC45 PE=1 SV=1	1	1	1	41.123	379	1.9512	3.7	0	0	0	0	0
Q7JYZ9	tr|Q7JYZ9|Q7JYZ9_DROME Glutathione S transferase E2 OS=Drosophila melanogaster GN=GstE2 PE=2 SV=1	1	1	1	25.228	221	3.9658	0	5.9	5.9	0	5067500	14086000
Q7JZ25	tr|Q7JZ25|Q7JZ25_DROME Chloride channel protein OS=Drosophila melanogaster GN=ClC-b PE=1 SV=1	1	2	2	90.519	813	2.8389	0	3	0	0	4499400	0
Q7JZF5	tr|Q7JZF5|Q7JZF5_DROME RE34924p OS=Drosophila melanogaster GN=Rpb5 PE=1 SV=1	1	1	1	24.484	210	30.762	0	8.1	8.1	0	19310000	23524000
Q7JZN0	tr|Q7JZN0|Q7JZN0_DROME Protein transport protein Sec61 subunit beta OS=Drosophila melanogaster GN=Sec61beta PE=1 SV=1	1	1	1	10.246	100	2.6992	0	14	14	0	8681400	25071000
Q7K0Y1	sp|Q7K0Y1|BOP1_DROME Ribosome biogenesis protein BOP1 homolog OS=Drosophila melanogaster GN=CG5033 PE=2 SV=1	1	1	1	90.443	784	2.1659	0	1.4	0	0	0	0
Q7K127	tr|Q7K127|Q7K127_DROME CG7997, isoform A OS=Drosophila melanogaster GN=CG7997 PE=1 SV=1	1	1	1	47.403	417	1.9759	0	1.9	1.9	0	37030000	52357000
Q7K159	tr|Q7K159|Q7K159_DROME LD06557p OS=Drosophila melanogaster GN=mip40 PE=1 SV=1	1	1	1	30.101	267	3.8068	0	6.4	0	0	3256300	0
Q7K1M4	tr|Q7K1M4|Q7K1M4_DROME CG1902, isoform A OS=Drosophila melanogaster GN=CG1902 PE=1 SV=1	1	1	1	35.791	312	7.3704	0	3.5	3.5	0	0	0
Q7K1P7;Q8IMV6;Q8IGV1	tr|Q7K1P7|Q7K1P7_DROME LP03039p OS=Drosophila melanogaster GN=Saf-B PE=2 SV=1;tr|Q8IMV6|Q8IMV6_DROME Scaffold attachment factor B, isoform B OS=Drosophila melanogaster GN=Saf-B PE=1 SV=2;tr|Q8IGV1|Q8IGV1_DROME RE24907p (Fragment) OS=Drosophila melanogaster	3	1	1	44.353	392	3.6975	0	5.1	0	0	6676200	0
Q7K1W5	tr|Q7K1W5|Q7K1W5_DROME CG8187 OS=Drosophila melanogaster GN=CG8187 PE=1 SV=1	1	1	1	41.626	376	2.004	0	0	3.5	0	0	3829500
Q7K2B0	sp|Q7K2B0|RRP8_DROME Ribosomal RNA-processing protein 8 OS=Drosophila melanogaster GN=CG7137 PE=1 SV=1	1	2	2	40.288	358	10.197	3.4	3.4	7.8	0	10639000	0
Q7K2V9	tr|Q7K2V9|Q7K2V9_DROME Mevalonate kinase OS=Drosophila melanogaster GN=CG16804 PE=2 SV=1	1	1	1	42.464	390	2.2855	0	0	2.6	0	0	0
Q7K3K5;M9PEG6	tr|Q7K3K5|Q7K3K5_DROME LD22804p OS=Drosophila melanogaster GN=ZnT63C PE=1 SV=1;tr|M9PEG6|M9PEG6_DROME Zinc transporter 63C, isoform F OS=Drosophila melanogaster GN=ZnT63C PE=1 SV=1	2	1	1	49.032	449	4.2774	0	4.7	0	0	4594400	0
Q7K3M5	tr|Q7K3M5|Q7K3M5_DROME DHX15 ortholog, isoform A OS=Drosophila melanogaster GN=Dhx15 PE=1 SV=1	1	2	2	82.651	729	4.8449	0	0	3.6	0	0	27673000
Q7K4C7	tr|Q7K4C7|Q7K4C7_DROME CTP:phosphocholine cytidylyltransferase 1, isoform A OS=Drosophila melanogaster GN=Pcyt1 PE=1 SV=1	1	1	1	58.201	526	7.8093	0	0	5.1	0	0	12545000
Q7K7A9	sp|Q7K7A9|FEN1_DROME Flap endonuclease 1 OS=Drosophila melanogaster GN=Fen1 PE=2 SV=1	1	3	3	42.948	385	14.264	0	7.8	11.2	0	18862000	80155000
Q7KN97;Q0E9E2;Q6NKL9;Q86NV1	tr|Q7KN97|Q7KN97_DROME Pyruvate carboxylase OS=Drosophila melanogaster GN=PCB PE=1 SV=1;tr|Q0E9E2|Q0E9E2_DROME Pyruvate carboxylase OS=Drosophila melanogaster GN=PCB PE=1 SV=1;tr|Q6NKL9|Q6NKL9_DROME RH57795p (Fragment) OS=Drosophila melanogaster PE=2 SV=1;	4	4	4	130.86	1181	8.4412	0	3	5.3	0	6546800	28421000
Q7KQM6	sp|Q7KQM6|GGYF1_DROME GIGYF family protein CG11148 OS=Drosophila melanogaster GN=CG11148 PE=1 SV=2	1	3	3	173.73	1574	6.0091	0	0	2.5	0	0	28518000
Q7KSB7;Q9VDS9;Q8I6M5;Q4QQD0;B9EQQ2	tr|Q7KSB7|Q7KSB7_DROME Apoptotic signal-regulating kinase 1, isoform B OS=Drosophila melanogaster GN=Ask1 PE=1 SV=1;tr|Q9VDS9|Q9VDS9_DROME Apoptotic signal-regulating kinase 1, isoform C OS=Drosophila melanogaster GN=Ask1 PE=1 SV=3;tr|Q8I6M5|Q8I6M5_DROME D	5	1	1	136.51	1196	1.9472	0	0	0.8	0	0	0
Q7KTY3;Q0GT94;Q0GT88;Q86PD7	tr|Q7KTY3|Q7KTY3_DROME CG5976 OS=Drosophila melanogaster GN=isoQC PE=2 SV=1;tr|Q0GT94|Q0GT94_DROME CG5976 OS=Drosophila melanogaster GN=CG5976 PE=4 SV=1;tr|Q0GT88|Q0GT88_DROME CG5976 OS=Drosophila melanogaster GN=CG5976 PE=4 SV=1;tr|Q86PD7|Q86PD7_DROME Iso	4	3	3	40.336	352	8.255	0	11.6	8	0	29301000	28904000
Q7KVQ7;C9QP43;Q9W2S1	tr|Q7KVQ7|Q7KVQ7_DROME Transport and golgi organization 5, isoform B OS=Drosophila melanogaster GN=Tango5 PE=1 SV=1;tr|C9QP43|C9QP43_DROME IP15944p OS=Drosophila melanogaster GN=Tango5-RC PE=2 SV=1;tr|Q9W2S1|Q9W2S1_DROME FI17817p1 OS=Drosophila melanogaste	3	4	4	47.893	428	26.178	0	9.8	10.7	0	24087000	51056000
Q7KVS9	sp|Q7KVS9|TRF41_DROME Non-canonical poly(A) RNA polymerase protein Trf4-1 OS=Drosophila melanogaster GN=Trf4-1 PE=1 SV=1	1	2	2	108.72	1001	5.0225	0	0	2.9	0	0	12392000
Q7KVT8;Q9W3M4	tr|Q7KVT8|Q7KVT8_DROME Lethal (1) G0193, isoform B OS=Drosophila melanogaster GN=l(1)G0193 PE=1 SV=1;tr|Q9W3M4|Q9W3M4_DROME LD24308p OS=Drosophila melanogaster GN=l(1)G0193 PE=1 SV=1	2	1	1	75.385	646	20.695	0	3.1	3.1	0	0	0
Q7KVW2;B3DN73;Q9W4A7	tr|Q7KVW2|Q7KVW2_DROME FI18256p1 OS=Drosophila melanogaster GN=l(1)G0045 PE=2 SV=1;tr|B3DN73|B3DN73_DROME RE46306p OS=Drosophila melanogaster GN=CG32763-RA PE=2 SV=1;tr|Q9W4A7|Q9W4A7_DROME Uncharacterized protein OS=Drosophila melanogaster GN=l(1)G0045 PE=	3	2	2	98.825	857	2.6174	0	0.9	2.3	0	5625800	13661000
Q7PLI7	sp|Q7PLI7|DCLK_DROME Serine/threonine-protein kinase CG17528 OS=Drosophila melanogaster GN=CG17528 PE=1 SV=1	1	1	1	82.97	748	4.1135	0	0	2.3	0	0	21162000
Q7PLL6;Q5BIL6	tr|Q7PLL6|Q7PLL6_DROME Uncharacterized protein, isoform A OS=Drosophila melanogaster GN=Dmel\CG17514 PE=1 SV=2	2	3	3	293.91	2630	4.6177	1	0	0.9	0	0	0
Q7YU24;B4YW91;A9YJ70;F6JB17	sp|Q7YU24|MARF_DROME Transmembrane GTPase Marf OS=Drosophila melanogaster GN=Marf PE=1 SV=1;tr|B4YW91|B4YW91_DROME Uncharacterized protein (Fragment) OS=Drosophila melanogaster GN=CG3869 PE=4 SV=1;tr|A9YJ70|A9YJ70_DROME CG3869 (Fragment) OS=Drosophila mela	4	2	2	91.371	810	4.6836	0	0	3.6	0	0	0
Q7YU82;Q9W3L1	tr|Q7YU82|Q7YU82_DROME SD07232p OS=Drosophila melanogaster GN=Upf2 PE=2 SV=1;tr|Q9W3L1|Q9W3L1_DROME RE04053p OS=Drosophila melanogaster GN=Upf2 PE=1 SV=1	2	1	1	78.459	698	3.089	0	3	3	0	3818400	10242000
Q7YZA2	sp|Q7YZA2|Y7065_DROME Uncharacterized protein CG7065 OS=Drosophila melanogaster GN=CG7065 PE=1 SV=1	1	2	2	136.77	1231	9.5734	0	0	3.6	0	0	19046000
Q86NN5;A0A024E3A5;Q9VPE2;Q059D4	tr|Q86NN5|Q86NN5_DROME GM13757p OS=Drosophila melanogaster GN=ND-39 PE=2 SV=1;tr|A0A024E3A5|A0A024E3A5_DROME FI24283p1 OS=Drosophila melanogaster GN=CG6020-RA PE=2 SV=1;tr|Q9VPE2|Q9VPE2_DROME NADH dehydrogenase (Ubiquinone) 39 kDa subunit, isoform A OS=Dro	4	4	4	37.789	327	14.68	0	4.3	22	0	3401900	15662000
Q86NS0;A0A0B4LEK8;A1Z813;Q95R66	tr|Q86NS0|Q86NS0_DROME RE70550p OS=Drosophila melanogaster GN=CG1472 PE=2 SV=1;tr|A0A0B4LEK8|A0A0B4LEK8_DROME Sec24AB ortholog, isoform C OS=Drosophila melanogaster GN=Sec24AB PE=1 SV=1;tr|A1Z813|A1Z813_DROME Sec24AB ortholog, isoform A OS=Drosophila melan	4	5	5	95.549	852	17.685	0	8.1	6.3	0	37285000	30678000
Q8I0S9;Q9V9T5	tr|Q8I0S9|Q8I0S9_DROME CG2118, isoform B OS=Drosophila melanogaster GN=mcc PE=1 SV=1;tr|Q9V9T5|Q9V9T5_DROME CG2118, isoform A OS=Drosophila melanogaster GN=mcc PE=1 SV=2	2	1	1	69.41	634	3.5453	0	0	2.5	0	0	17294000
Q8I941	tr|Q8I941|Q8I941_DROME GH16843p OS=Drosophila melanogaster GN=Dmel\CG32485 PE=2 SV=1	1	2	2	25.988	222	6.451	0	0	11.3	0	0	12147000
Q8IA36;Q9W253	tr|Q8IA36|Q8IA36_DROME DAP3 OS=Drosophila melanogaster GN=mRpS29 PE=4 SV=1;tr|Q9W253|Q9W253_DROME LD41023p OS=Drosophila melanogaster GN=mRpS29 PE=1 SV=1	2	1	1	44.071	390	1.9755	0	0	2.6	0	0	13063000
Q8IG85;Q8IRE3;Q6AWD7;Q960U6;W8PHN3	tr|Q8IG85|Q8IG85_DROME SD21833p (Fragment) OS=Drosophila melanogaster GN=gry PE=2 SV=1;tr|Q8IRE3|Q8IRE3_DROME Gryzun OS=Drosophila melanogaster GN=gry PE=1 SV=2;tr|Q6AWD7|Q6AWD7_DROME AT04056p OS=Drosophila melanogaster PE=2 SV=1;tr|Q960U6|Q960U6_DROME LD3	5	7	7	141.76	1252	10.611	0.6	3.4	7.5	0	12657000	44202000
Q8IGH0;Q8MTA2;Q8IMR3;Q9VBC5;Q8IMR4;Q6NNZ6;H8F4V3	tr|Q8IGH0|Q8IGH0_DROME RH23428p OS=Drosophila melanogaster GN=CG5484 PE=2 SV=1;tr|Q8MTA2|Q8MTA2_DROME AT18469p OS=Drosophila melanogaster GN=CG5484 PE=2 SV=1;tr|Q8IMR3|Q8IMR3_DROME CG5484, isoform B OS=Drosophila melanogaster GN=COP PE=1 SV=1;tr|Q9VBC5|Q9V	7	2	2	28.216	245	8.1975	0	9	9	0	23700000	10779000
Q8IH00	sp|Q8IH00|NOL6_DROME Nucleolar protein 6 OS=Drosophila melanogaster GN=Mat89Ba PE=1 SV=1	1	4	4	136.38	1193	9.5311	0	4.4	3.9	0	20298000	22933000
Q8IHB3;Q8ING1	tr|Q8IHB3|Q8IHB3_DROME AT17065p (Fragment) OS=Drosophila melanogaster GN=CG31327 PE=2 SV=1;tr|Q8ING1|Q8ING1_DROME Uncharacterized protein OS=Drosophila melanogaster GN=BcDNA:AT17065 PE=4 SV=1	2	1	1	78.514	687	-2	0	1	0	0	0	0
Q8INE8;Q9VFB3	tr|Q8INE8|Q8INE8_DROME Arginine methyltransferase 3, isoform B OS=Drosophila melanogaster GN=Art3 PE=1 SV=1;tr|Q9VFB3|Q9VFB3_DROME Arginine methyltransferase 3, isoform A OS=Drosophila melanogaster GN=Art3 PE=1 SV=1	2	1	1	54.203	474	5.0497	0	3.4	3.4	0	7252700	12200000
Q8IPB9;M9PCL9;Q9VKX1;M9PFI0;M9MRH8;M9PB92	tr|Q8IPB9|Q8IPB9_DROME CCR4-NOT transcription complex subunit 4, isoform G OS=Drosophila melanogaster GN=Cnot4 PE=1 SV=1;tr|M9PCL9|M9PCL9_DROME CCR4-NOT transcription complex subunit 4, isoform L OS=Drosophila melanogaster GN=Cnot4 PE=1 SV=1;tr|Q9VKX1|Q9VK	6	2	2	116.19	1047	2.3284	0	0	3.6	0	0	27674000
Q8IR39;C6TPA7;X2JKD2;M9NDX3;Q494M1;P30189;Q1WWG8	tr|Q8IR39|Q8IR39_DROME Topoisomerase 1, isoform B OS=Drosophila melanogaster GN=Top1 PE=1 SV=1;tr|C6TPA7|C6TPA7_DROME AT12251p OS=Drosophila melanogaster GN=Top1-RB PE=2 SV=1;tr|X2JKD2|X2JKD2_DROME Topoisomerase 1, isoform E OS=Drosophila melanogaster GN=T	7	5	5	68.641	581	20.265	0	12	3.4	0	31570000	10351000
Q8IRD1	tr|Q8IRD1|Q8IRD1_DROME Uncharacterized protein OS=Drosophila melanogaster GN=Dmel\CG12010 PE=4 SV=1	1	1	1	80.235	717	-2	0	0	1.8	0	0	15256000
Q8IRH4;B8A420;I0B1P6;D3DMI1;Q9W0G1	tr|Q8IRH4|Q8IRH4_DROME Protein tyrosine phosphatase 61F, isoform D OS=Drosophila melanogaster GN=Ptp61F PE=1 SV=1;tr|B8A420|B8A420_DROME RE73935p OS=Drosophila melanogaster GN=Ptp61F-RA PE=2 SV=1;tr|I0B1P6|I0B1P6_DROME FI19882p1 OS=Drosophila melanogaster	5	1	1	48.516	431	2.2889	0	2.1	2.1	0	7245800	9714600
Q8MLP1;Q7YZB2;Q59E61;B7YZQ1;Q9W179;A4UZU8	tr|Q8MLP1|Q8MLP1_DROME Sterile20-like kinase, isoform A OS=Drosophila melanogaster GN=Slik PE=1 SV=1;tr|Q7YZB2|Q7YZB2_DROME Polo kinase kinase 1 OS=Drosophila melanogaster GN=Slik PE=2 SV=1;tr|Q59E61|Q59E61_DROME FI24227p1 OS=Drosophila melanogaster GN=Sli	6	3	3	147.47	1300	23.189	0	0	4.8	0	0	24627000
Q8MRJ1;H1UUH6;B7Z0P8;Q9VC99	tr|Q8MRJ1|Q8MRJ1_DROME LD13909p OS=Drosophila melanogaster GN=CG6364 PE=2 SV=1;tr|H1UUH6|H1UUH6_DROME CG6364, isoform C OS=Drosophila melanogaster GN=CG6364-RA PE=1 SV=1;tr|B7Z0P8|B7Z0P8_DROME CG6364, isoform B OS=Drosophila melanogaster GN=CR42873 PE=1 SV	4	1	1	29.223	260	5.7553	5.8	0	0	0	0	0
Q8MRT0;Q9VHR5;N0A2N3	tr|Q8MRT0|Q8MRT0_DROME SD27884p OS=Drosophila melanogaster GN=CG9684 PE=2 SV=1;tr|Q9VHR5|Q9VHR5_DROME CG9684 OS=Drosophila melanogaster GN=Dmel\CG9684 PE=1 SV=2;tr|N0A2N3|N0A2N3_DROME LD24381p1 (Fragment) OS=Drosophila melanogaster GN=CG9684-RA PE=2 SV=1	3	1	1	51.614	466	2.4182	0	0	2.8	0	0	7954500
Q8MRT3;V9GZW9	tr|Q8MRT3|Q8MRT3_DROME SD27140p OS=Drosophila melanogaster PE=2 SV=1;tr|V9GZW9|V9GZW9_DROME Uncharacterized protein OS=Drosophila melanogaster GN=ORF PE=4 SV=1	2	2	2	115.49	1015	5.8276	0	0	3.2	0	0	10431000
Q8MRW1	tr|Q8MRW1|Q8MRW1_DROME SD19278p OS=Drosophila melanogaster GN=Tim23 PE=1 SV=1	1	1	1	22.138	206	3.4248	0	0	8.3	0	0	13731000
Q8MSB1	tr|Q8MSB1|Q8MSB1_DROME LD35157p OS=Drosophila melanogaster GN=CG13638 PE=1 SV=1	1	2	2	45.375	394	3.4797	0	3.3	5.3	0	0	0
Q8MSN1;A1ZBP5	tr|Q8MSN1|Q8MSN1_DROME AT17959p OS=Drosophila melanogaster GN=CG15128 PE=2 SV=1;tr|A1ZBP5|A1ZBP5_DROME FI19322p1 OS=Drosophila melanogaster GN=CG15128-RA PE=2 SV=1	2	1	1	67.436	580	-2	0	1.6	0	0	7921300	0
Q8MSV1;D3DMZ2;Q9XZF0	tr|Q8MSV1|Q8MSV1_DROME Protein yippee-like OS=Drosophila melanogaster GN=Yippee PE=1 SV=1;tr|D3DMZ2|D3DMZ2_DROME Protein yippee-like OS=Drosophila melanogaster GN=Yippee-RA PE=2 SV=1;sp|Q9XZF0|YIPP_DROME Protein yippee OS=Drosophila melanogaster GN=Yippee	3	1	1	12.681	110	-2	0	0	11.8	0	0	0
Q8MSW9	tr|Q8MSW9|Q8MSW9_DROME LD17611p OS=Drosophila melanogaster GN=U3-55K PE=1 SV=1	1	7	7	53.285	484	17.421	0	12.6	6.6	0	47755000	21454000
Q8SWU0;Q9VBI4;Q7KRZ3;H1UUJ5	tr|Q8SWU0|Q8SWU0_DROME RE36786p OS=Drosophila melanogaster GN=Exo84 PE=2 SV=1;tr|Q9VBI4|Q9VBI4_DROME Exocyst 84, isoform A OS=Drosophila melanogaster GN=Exo84 PE=1 SV=1;tr|Q7KRZ3|Q7KRZ3_DROME Exocyst 84, isoform B OS=Drosophila melanogaster GN=Exo84 PE=1 S	4	3	3	60.165	529	9.5249	0	1.3	8.1	0	0	18206000
Q8SX50;Q9W039	tr|Q8SX50|Q8SX50_DROME CG9018, isoform B OS=Drosophila melanogaster GN=Dmel\CG9018 PE=1 SV=1;tr|Q9W039|Q9W039_DROME CG9018, isoform A OS=Drosophila melanogaster GN=Dmel\CG9018 PE=1 SV=1	2	1	1	38.386	341	7.205	0	4.7	4.7	0	4719500	0
Q8SX73;Q9VJI6;X2JED0;A8DZ09;M9PG25;M9PBC6	tr|Q8SX73|Q8SX73_DROME LD27810p OS=Drosophila melanogaster GN=BuGZ PE=2 SV=1;tr|Q9VJI6|Q9VJI6_DROME Bub3 interacting GLEBS and zinc finger domain protein, isoform A OS=Drosophila melanogaster GN=BuGZ PE=1 SV=2;tr|X2JED0|X2JED0_DROME Bub3 interacting GLEBS	6	1	1	10.6	101	2.4598	0	0	13.9	0	0	5927200
Q8SXU3	tr|Q8SXU3|Q8SXU3_DROME CG8207 OS=Drosophila melanogaster GN=CG8207 PE=1 SV=1	1	2	2	48.11	438	4.333	0	0	6.2	0	0	35165000
Q8SXX1	tr|Q8SXX1|Q8SXX1_DROME Phosphatidylinositol 5-phosphate 4-kinase, isoform A OS=Drosophila melanogaster GN=PIP4K PE=1 SV=1	1	3	3	47.032	404	5.2331	0	5	9.2	0	8782700	48912000
Q8SY39	tr|Q8SY39|Q8SY39_DROME LD28101p OS=Drosophila melanogaster GN=CG6994 PE=1 SV=1	1	1	1	93.369	827	5.6777	0	0	4	0	0	8237100
Q8SYP9	tr|Q8SYP9|Q8SYP9_DROME Mitochondrial ribosomal protein S5, isoform A OS=Drosophila melanogaster GN=mRpS5 PE=1 SV=1	1	2	2	45.985	407	5.7818	0	0	6.6	0	0	0
Q8SZ63	sp|Q8SZ63|GOGA5_DROME Golgin-84 OS=Drosophila melanogaster GN=Golgin84 PE=1 SV=2	1	2	2	58.679	516	3.846	0	2.9	5	0	3201100	5123500
Q8SZY9	tr|Q8SZY9|Q8SZY9_DROME LD47413p OS=Drosophila melanogaster GN=CG6316 PE=1 SV=1	1	2	2	61.785	541	5.5134	0	5	5	0	10046000	9013300
Q8T0A7;A0A0B4KG14;A0A0B4KF57;Q9VMY8	tr|Q8T0A7|Q8T0A7_DROME LD15107p OS=Drosophila melanogaster GN=aux PE=2 SV=1;tr|A0A0B4KG14|A0A0B4KG14_DROME Auxilin, isoform C OS=Drosophila melanogaster GN=aux PE=1 SV=1;tr|A0A0B4KF57|A0A0B4KF57_DROME Auxilin, isoform D OS=Drosophila melanogaster GN=aux PE	4	1	1	72.866	664	8.6907	0	0	3.3	0	0	9342800
Q8T0C2;Q2PDW1;Q9VPT9	tr|Q8T0C2|Q8T0C2_DROME LD11211p OS=Drosophila melanogaster GN=CG3662 PE=2 SV=1;tr|Q2PDW1|Q2PDW1_DROME CG3662, isoform B OS=Drosophila melanogaster GN=Dmel\CG3662 PE=1 SV=1;tr|Q9VPT9|Q9VPT9_DROME CG3662, isoform A OS=Drosophila melanogaster GN=Dmel\CG3662 P	3	1	1	30.923	269	-2	0	0	3.3	0	0	0
Q8T3J2;Q2XY32;Q9VK54;P91643;L7XBB4	tr|Q8T3J2|Q8T3J2_DROME SD01674p OS=Drosophila melanogaster GN=kek1 PE=2 SV=1;tr|Q2XY32|Q2XY32_DROME CG12283 (Fragment) OS=Drosophila melanogaster GN=kek1 PE=4 SV=1;tr|Q9VK54|Q9VK54_DROME Kekkon-1, isoform B OS=Drosophila melanogaster GN=kek1 PE=4 SV=3;tr|P	5	1	1	87.657	810	-2	2.8	0	0	0	0	0
Q8T3K2;Q0KHR5;Q9VX92	tr|Q8T3K2|Q8T3K2_DROME SD08167p OS=Drosophila melanogaster GN=RhoGAP15B PE=2 SV=1;tr|Q0KHR5|Q0KHR5_DROME Rho GTPase activating protein at 15B, isoform B OS=Drosophila melanogaster GN=RhoGAP15B PE=1 SV=1;tr|Q9VX92|Q9VX92_DROME Rho GTPase activating protein	3	4	4	139.05	1226	10.608	0	0	3.7	0	0	44790000
Q8T4D6	tr|Q8T4D6|Q8T4D6_DROME Aconitate hydratase, mitochondrial OS=Drosophila melanogaster GN=Dmel\CG4706 PE=2 SV=1	1	3	1	85.053	783	-2	1.1	3.6	4.5	0	0	84241000
Q8T4E1	sp|Q8T4E1|GPI8_DROME Putative GPI-anchor transamidase OS=Drosophila melanogaster GN=PIG-K PE=2 SV=1	1	1	1	40.368	355	4.7446	0	0	6.5	0	0	8102800
Q8T4F9;Q9VCH1	tr|Q8T4F9|Q8T4F9_DROME SD03848p OS=Drosophila melanogaster GN=eIF4G2 PE=2 SV=1;tr|Q9VCH1|Q9VCH1_DROME Eukaryotic translation initiation factor 4G2, isoform A OS=Drosophila melanogaster GN=eIF4G2 PE=1 SV=2	2	4	3	106.86	933	6.8483	0.8	0	4.7	0	0	30151000
Q8T9D2;Q9VVM8;Q5U160	tr|Q8T9D2|Q8T9D2_DROME SD05938p OS=Drosophila melanogaster GN=CG5290 PE=2 SV=1;tr|Q9VVM8|Q9VVM8_DROME CG5290 OS=Drosophila melanogaster GN=Dmel\CG5290 PE=1 SV=1;tr|Q5U160|Q5U160_DROME RE04643p OS=Drosophila melanogaster GN=CG5290 PE=2 SV=1	3	2	2	57.383	500	3.5999	0	0	4.8	0	0	12123000
Q8T9D5;Q7KV27;Q9VYD9	tr|Q8T9D5|Q8T9D5_DROME SD05601p OS=Drosophila melanogaster GN=CG1640 PE=2 SV=1;tr|Q7KV27|Q7KV27_DROME CG1640, isoform A OS=Drosophila melanogaster GN=Dmel\CG1640 PE=1 SV=1;tr|Q9VYD9|Q9VYD9_DROME AT04676p OS=Drosophila melanogaster GN=Dmel\CG1640 PE=1 SV=3	3	1	1	63.155	568	5.3973	0	3	0	0	9283700	0
Q94513;Q7JN06;D0IQ89	tr|Q94513|Q94513_DROME Boundary element associated factor OS=Drosophila melanogaster GN=BEAF-32 PE=1 SV=1;tr|Q7JN06|Q7JN06_DROME Boundary element associated factor OS=Drosophila melanogaster GN=BEAF-32 PE=1 SV=1;tr|D0IQ89|D0IQ89_DROME SD16942p (Fragment) O	3	2	2	31.776	282	4.6881	0	3.9	10.3	0	3711400	32950000
Q94527	sp|Q94527|NFKB1_DROME Nuclear factor NF-kappa-B p110 subunit OS=Drosophila melanogaster GN=Rel PE=1 SV=1	1	1	1	109.77	971	2.4179	0	0	1.1	0	0	5642400
Q95PE4	tr|Q95PE4|Q95PE4_DROME GEO07784p1 OS=Drosophila melanogaster GN=Mpp6 PE=2 SV=1	1	1	1	18.468	162	6.223	6.2	0	6.2	0	0	0
Q95R82;Q7KGU6;F2FB78	tr|Q95R82|Q95R82_DROME SD02746p OS=Drosophila melanogaster GN=CG14767 PE=2 SV=1;tr|Q7KGU6|Q7KGU6_DROME Lysosomal-associated transmembrane protein OS=Drosophila melanogaster GN=CG14767 PE=2 SV=1;tr|F2FB78|F2FB78_DROME LP21420p (Fragment) OS=Drosophila melan	3	1	1	47.005	428	3.111	0	4.2	0	0	0	0
Q95S25;Q7KND8	tr|Q95S25|Q95S25_DROME GM14169p OS=Drosophila melanogaster GN=Mad1 PE=2 SV=1;tr|Q7KND8|Q7KND8_DROME FI09619p OS=Drosophila melanogaster GN=Mad1 PE=1 SV=1	2	1	1	85.003	730	1.982	0	0	2.1	0	0	0
Q95S89;Q9VGZ4;Q8MSU8	tr|Q95S89|Q95S89_DROME GM05651p OS=Drosophila melanogaster GN=CG6325 PE=2 SV=1;tr|Q9VGZ4|Q9VGZ4_DROME CG6325 OS=Drosophila melanogaster GN=Dmel\CG6325 PE=2 SV=1;tr|Q8MSU8|Q8MSU8_DROME LD43055p OS=Drosophila melanogaster GN=CG6325 PE=2 SV=1	3	1	1	32.847	285	-2	0	4.9	4.9	0	3440100	21296000
Q95SC3;Q9VZ62	tr|Q95SC3|Q95SC3_DROME GM03548p OS=Drosophila melanogaster GN=feo PE=2 SV=1;tr|Q9VZ62|Q9VZ62_DROME Fascetto OS=Drosophila melanogaster GN=feo PE=1 SV=1	2	1	1	47.89	413	13.809	0	0	7.3	0	0	9466300
Q95SH0	tr|Q95SH0|Q95SH0_DROME GH26463p OS=Drosophila melanogaster GN=Pask PE=2 SV=1	1	1	1	109.34	985	-2	0	0	1.3	0	0	0
Q95TH3;Q9VV61	tr|Q95TH3|Q95TH3_DROME SD04694p OS=Drosophila melanogaster GN=CG4638 PE=2 SV=1;tr|Q9VV61|Q9VV61_DROME Uncharacterized protein OS=Drosophila melanogaster GN=Dmel\CG33158 PE=1 SV=3	2	1	1	106.04	949	5.4304	0	0	2.3	0	0	17579000
Q95TJ2;A1Z9M5	tr|Q95TJ2|Q95TJ2_DROME LP06813p OS=Drosophila melanogaster GN=CG13017 PE=2 SV=1;tr|A1Z9M5|A1Z9M5_DROME Uncharacterized protein OS=Drosophila melanogaster GN=CG30069 PE=1 SV=1	2	3	3	142.78	1261	12.265	0	0	3.2	0	0	20435000
Q95U50;M9PEY8;Q9VT34	tr|Q95U50|Q95U50_DROME GH07092p OS=Drosophila melanogaster GN=CG6761 PE=2 SV=1;tr|M9PEY8|M9PEY8_DROME CG6761, isoform B OS=Drosophila melanogaster GN=Dmel\CG6761 PE=4 SV=1;tr|Q9VT34|Q9VT34_DROME CG6761, isoform A OS=Drosophila melanogaster GN=Dmel\CG6761 P	3	1	1	92.606	828	-2	0	0	2.1	0	0	0
Q960F5;Q9VWY8;A9UND9;X2JCF3	tr|Q960F5|Q960F5_DROME SD04011p OS=Drosophila melanogaster GN=RhoGAP16F PE=2 SV=1;tr|Q9VWY8|Q9VWY8_DROME FI19895p1 OS=Drosophila melanogaster GN=RhoGAP16F PE=2 SV=3;tr|A9UND9|A9UND9_DROME SD26845p OS=Drosophila melanogaster GN=RhoGAP16F PE=2 SV=1;tr|X2JCF3	4	2	2	51.316	454	5.9646	0	0	5.9	0	0	24052000
Q960V6;Q7K9H6	tr|Q960V6|Q960V6_DROME LD33044p OS=Drosophila melanogaster GN=Sara PE=2 SV=1;tr|Q7K9H6|Q7K9H6_DROME FI05490p OS=Drosophila melanogaster GN=Sara PE=1 SV=1	2	4	4	146.26	1343	15.106	2.5	0	4.7	0	0	43715000
Q961V1;Q9W464	tr|Q961V1|Q961V1_DROME GH05723p OS=Drosophila melanogaster GN=GAA1 PE=2 SV=1;tr|Q9W464|Q9W464_DROME Glycosylphosphatidylinositol anchor attachment 1 OS=Drosophila melanogaster GN=GAA1 PE=1 SV=1	2	1	1	62.301	561	2.6769	0	2.3	0	0	7136300	0
Q967T6	tr|Q967T6|Q967T6_DROME Gag protein OS=Drosophila melanogaster GN=gag PE=4 SV=1	1	1	1	50.737	454	2.6593	0	0	2.4	0	0	10096000
Q9BKE4;Q8INT6;C7LAC9;Q9BKE5;Q9VID4	tr|Q9BKE4|Q9BKE4_DROME Mlx interactor gamma OS=Drosophila melanogaster GN=Mondo PE=2 SV=1;tr|Q8INT6|Q8INT6_DROME FI20159p1 OS=Drosophila melanogaster GN=Mondo PE=2 SV=1;tr|C7LAC9|C7LAC9_DROME RE22394p OS=Drosophila melanogaster GN=Mio-RE PE=2 SV=1;tr|Q9BKE	5	1	1	92.399	836	7.3521	0	0	3.5	0	0	12267000
Q9BPQ2;Q9BPQ3;A0A0B4JDD2;Q9VF00	tr|Q9BPQ2|Q9BPQ2_DROME DGATAe protein OS=Drosophila melanogaster GN=GATAe PE=2 SV=1;tr|Q9BPQ3|Q9BPQ3_DROME GATA factor e (Fragment) OS=Drosophila melanogaster GN=GATAe PE=2 SV=1;tr|A0A0B4JDD2|A0A0B4JDD2_DROME GATAe, isoform B OS=Drosophila melanogaster GN=	4	1	1	62.103	571	1.9309	0	0	2.1	0	0	11248000
[truncated: 181 more rows]

## Sheet: proteins in flag
Protein IDs	Fasta headers	Peptides	Unique peptides	Sequence coverage R804-flag [%]	Sequence coverage R804-S2 [%]	Intensity R804-flag	Intensity R804-S2
[truncated: 79 more rows]

[truncated: 2 more sheets: proteins in Flag AC, proteins in flag and flag AC]
